# Supplementary material for: Atroposelective synthesis of N–N axially chiral pyrrolyl(aza)-quinolinone by de novo ring formation
Source: Royal Society of Chemistry journal article supplement (doi:10.1039/d3qo01877f), 2023-12-04

# Atroposelective synthesis of N–N axially chiral pyrrolyl(aza)quinolinone by de novo ring formation

Qiwen Huang,<sup>‡</sup> Yanze Li,<sup>‡</sup> Cun Yang, Wendan Wu, Jingjie Hai, Xinyao Li \*

*Department of Chemistry, College of Sciences, Shanghai Engineering Research Center of Organ Repair, Shanghai University, Shanghai 200444, P. R. of China.*

*Email: xinyaoli@shu.edu.cn*

## Electronic Supplementary Information

### Table of contents:

|      |                                                                                |      |
|------|--------------------------------------------------------------------------------|------|
| (1)  | General Information .....                                                      | S1   |
| (2)  | Preparation of Substrates.....                                                 | S1   |
| (3)  | Synthesis and Characterization of Products 3 and 5.....                        | S8   |
| (4)  | Synthesis and Characterization of Products 7, 9-15 .....                       | S32  |
| (5)  | X-ray Crystallographic Data for Compound 3n and 5g.....                        | S38  |
| (6)  | Details of Calculation and Discussion .....                                    | S39  |
| (7)  | NCI and topology analyses of TS1 and TS2 .....                                 | S78  |
| (8)  | Reference.....                                                                 | S81  |
| (9)  | HPLC Resolution Data .....                                                     | S75  |
| (10) | Copies of <sup>1</sup> H, <sup>13</sup> C and <sup>19</sup> F NMR Spectra..... | S126 |

## (1) General Information

All reactions sensitive to air or moisture were carried out in flame-dried glassware under nitrogen pressure using standard Schlenk techniques. All reagents and solvents were purchased from commercial sources (Xi'an Yizhichen Biotechnology Co., Ltd) without further purification unless specially noted. Melting points were taken on a WRS-1B digital melting point apparatus without correction. Flash chromatography was performed on silica (300-400 mesh) with EtOAc-PE. Infrared spectra were obtained using a Nicolet AVATAR 370 FT-IR spectrometer.  $^1\text{H}$ ,  $^{13}\text{C}$ , and  $^{19}\text{F}$ -NMR spectra were recorded on a Bruker AV-500 or Varian 400 MHz spectrometer. NMR spectra were calibrated to the respective residual solvent signals of  $\text{CDCl}_3$  [ $\delta$  ( $^1\text{H}$ ) = 7.26 ppm,  $\delta$  ( $^{13}\text{C}$ ) = 77.16 ppm] and DMSO [ $\delta$  ( $^1\text{H}$ ) = 2.50 ppm,  $\delta$  ( $^{13}\text{C}$ ) = 39.52 ppm]. The following abbreviations for single multiplicities were used: s-singlet, d-doublet, t-triplet, q-quartet. High resolution mass spectroscopy (HR-MS) was performed on a Thermo Fisher Scientific LTQ FTICR-MS (DART) or Thermo Scientific Q Exactive HF Orbitrap-FTMS (ESI). The enantiomeric excess (ee) of products were determined by chiral phase HPLC analysis on Agress 1100 or Agilent HPLC units, chiral column: FLM-MD(2), FLM-ND(2), FLM-NQ(2) and FLM-MJ(2).

## (2) Preparation of Substrates

Typical procedure for synthesis substrate **1**<sup>1</sup> and **4**<sup>1</sup>

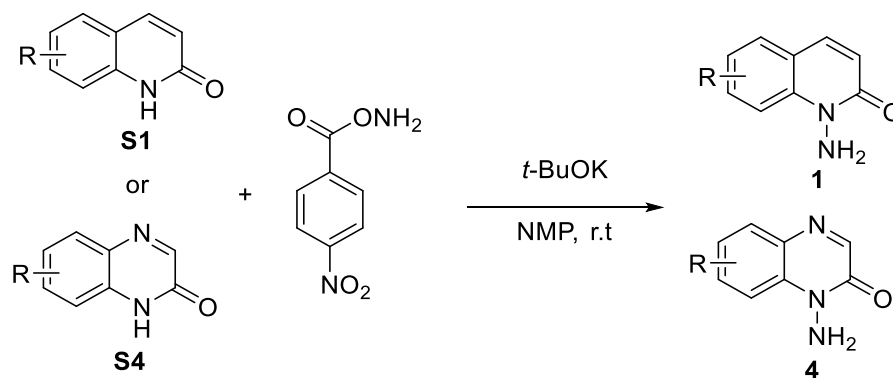

To a solution of **S1** or **S4** (2 mmol) in 15 mL *N*-methylpyrrolidone (NMP) was added 2.4 mL *t*-BuOK (1 M in THF) and the reaction mixture was stirred at room temperature for 0.5 h. Then a solution of *O*-(4-nitrobenzoyl)hydroxylamine (2.4 mmol) was added to the mixture, which was stirred at room temperature for 2 h. After the completion of the reaction which was indicated by TLC, the reaction mixture was quenched with  $\text{H}_2\text{O}$  and the aqueous layer was extracted with EtOAc ( $3 \times 10$  mL). The combined organic layers were dried over anhydrous  $\text{Na}_2\text{SO}_4$  and then concentrated under reduced pressure. The residue was purified through flash column chromatography on silica gel.

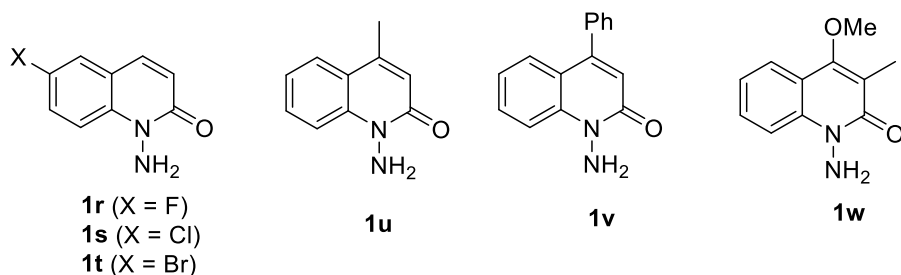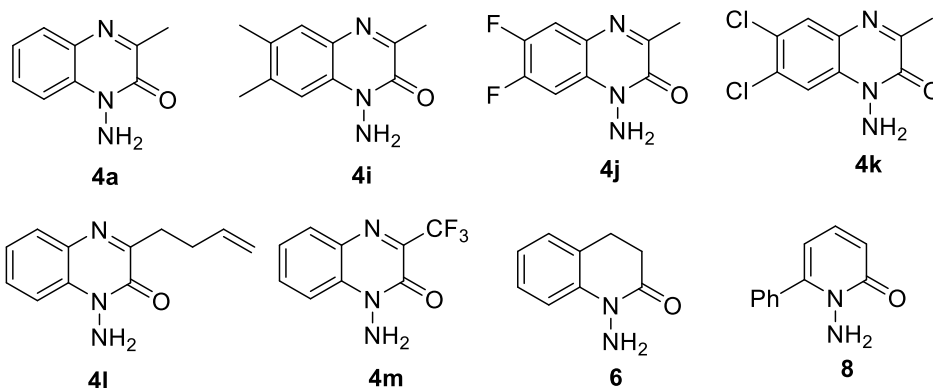

Characterization of the new substrates is shown below:

#### 1-amino-6-fluoroquinolin-2(1H)-one (**1r**):

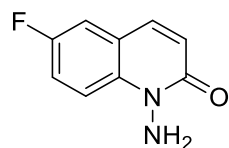

White solid (62% yield).

**M.p.:** 202-204 °C.

**<sup>1</sup>H NMR (400 MHz, DMSO-*d*<sub>6</sub>):** δ 7.88 (dd, *J* = 9.5, 3.6 Hz, 2H), 7.59 (dd, *J* = 9.0, 2.9 Hz, 1H), 7.51 (td, *J* = 8.9, 3.0 Hz, 1H), 6.77 (d, *J* = 9.5 Hz, 1H), 5.90 (s, 2H).

**<sup>13</sup>C NMR (101 MHz, DMSO-*d*<sub>6</sub>):** δ 159.7, 157.5 (d, *J* = 238.4 Hz), 137.7 (d, *J* = 3.0 Hz), 136.9, 121.9, 120.7 (d, *J* = 9.1 Hz), 119.0 (d, *J* = 24.2 Hz), 117.2 (d, *J* = 8.1 Hz), 113.4 (d, *J* = 23.2 Hz).

**<sup>19</sup>F NMR (376 MHz, DMSO-*d*<sub>6</sub>):** δ -121.8.

**HRMS (ESI) m/z:** [C<sub>22</sub>H<sub>18</sub>N<sub>2</sub>O<sub>3</sub>+H]<sup>+</sup> calcd.: 179.0615; found: 179.0611.

#### 1-amino-6-chloroquinolin-2(1H)-one (**1s**):

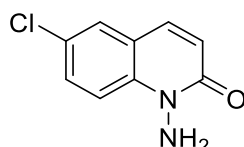

White solid (52% yield).

**M.p.:** 196-198 °C.

**<sup>1</sup>H NMR (400 MHz, CDCl<sub>3</sub>):** δ 7.91 (d, *J* = 8.7 Hz, 2H), 7.44 (d, *J* = 8.6 Hz, 2H), 4.22 (dd, *J* = 8.2, 5.5 Hz, 1H), 3.77 (s, 3H), 3.68 (dd, *J* = 18.4, 8.2 Hz, 1H), 3.47 (dd, *J* = 18.4, 5.6 Hz, 1H), 2.43 (s, 3H).

**<sup>13</sup>C NMR (101 MHz, CDCl<sub>3</sub>):** δ 160.9, 138.7, 137.7, 131.1, 128.0, 127.4, 121.6, 121.1, 116.4.

**HRMS (ESI) m/z:** [C<sub>22</sub>H<sub>18</sub>N<sub>2</sub>O<sub>3</sub>+H]<sup>+</sup> calcd.: 195.0320; found: 195.0315.

**1-amino-6-bromoquinolin-2(1H)-one (1t):**

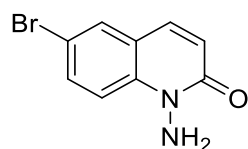

White solid (68% yield).

**M.p.:** 176-178 °C.

**<sup>1</sup>H NMR (400 MHz, CDCl<sub>3</sub>):** δ 7.87 (d, *J* = 8.9 Hz, 1H), 7.69 (d, *J* = 2.1 Hz, 1H), 7.66 (dd, *J* = 8.9, 2.2 Hz, 1H), 7.62 (d, *J* = 9.5 Hz, 1H), 6.78 (d, *J* = 9.5 Hz, 1H), 4.97 (s, 2H).

**<sup>13</sup>C NMR (101 MHz, CDCl<sub>3</sub>):** δ 160.9, 137.6, 133.8, 130.4, 121.6, 121.6, 116.7, 115.4

**HRMS (ESI) m/z:** [C<sub>22</sub>H<sub>18</sub>N<sub>2</sub>O<sub>3</sub>+H]<sup>+</sup> calcd.: 238.9815; found: 238.9813.

**1-amino-4-methylquinolin-2(1H)-one (1u):**

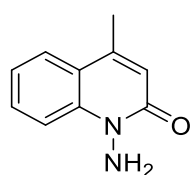

White solid (55% yield).

**M.p.:** 136-138 °C.

**<sup>1</sup>H NMR (400 MHz, CDCl<sub>3</sub>):** δ 7.98 (d, *J* = 8.5 Hz, 1H), 7.67 (dd, *J* = 8.0, 1.4 Hz, 1H), 7.61 - 7.55 (m, 1H), 7.28 - 7.22 (m, 1H), 6.60 (d, *J* = 1.2 Hz, 1H), 4.99 (s, 2H), 2.46 (d, *J* = 1.1 Hz, 3H).

**<sup>13</sup>C NMR (101 MHz, CDCl<sub>3</sub>):** δ 160.8, 146.6, 139.5, 130.8, 124.9, 122.3, 120.7, 119.6, 114.9, 19.1.

**HRMS (ESI) m/z:** [C<sub>22</sub>H<sub>18</sub>N<sub>2</sub>O<sub>3</sub>+H]<sup>+</sup> calcd.: 175.0866; found: 175.0862.

**1-amino-4-phenylquinolin-2(1H)-one (1v):**

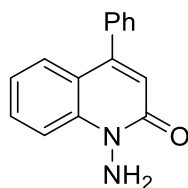

White solid (43% yield).

**M.p.:** 143-145 °C.



**<sup>1</sup>H NMR (400 MHz, CDCl<sub>3</sub>):** δ 8.05 (d, *J* = 8.5 Hz, 1H), 7.60 (t, *J* = 7.8 Hz, 1H), 7.53 (d, *J* = 8.1 Hz, 1H), 7.50 - 7.45 (m, 3H), 7.42 - 7.36 (m, 2H), 7.16 (t, *J* = 7.6 Hz, 1H), 6.70 (s, 1H), 5.13 (s, 2H).

**<sup>13</sup>C NMR (101 MHz, CDCl<sub>3</sub>):** δ 160.5, 150.9, 140.0, 137.0, 131.0, 129.0, 128.8, 128.7, 127.4, 122.3, 119.8, 119.7, 114.9.

**HRMS (ESI) m/z:** [C<sub>22</sub>H<sub>18</sub>N<sub>2</sub>O<sub>3</sub>+H]<sup>+</sup> calcd.:237.1023; found: 237.1017.

**1-amino-4-methoxy-3-methylquinolin-2(1H)-one (1w):**

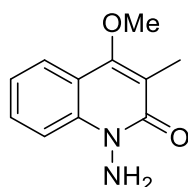

White solid (65% yield).

**M.p.:** 134-136 °C.

**<sup>1</sup>H NMR (400 MHz, CDCl<sub>3</sub>):** δ 7.97 (d, *J* = 8.6 Hz, 1H), 7.82 (d, *J* = 8.0 Hz, 1H), 7.57 (t, *J* = 7.8 Hz, 1H), 7.28-7.23 (m, 1H), 5.00 (s, 2H), 3.91 (s, 3H), 2.24 (s, 3H).

**<sup>13</sup>C NMR (101 MHz, CDCl<sub>3</sub>):** δ 163.3, 160.4, 138.6, 130.4, 122.9, 122.4, 118.0, 117.0, 114.6, 61.4, 10.7.

**HRMS (ESI) m/z:** [C<sub>22</sub>H<sub>18</sub>N<sub>2</sub>O<sub>3</sub>+H]<sup>+</sup> calcd.: 205.0972; found: 205.0967.

**1-Amino-3-methylquinoxalin-2(1H)-one (4a):**

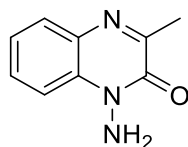

White solid (49% yield).

**M.p.:** 170-172 °C.

**<sup>1</sup>H NMR (400 MHz, CDCl<sub>3</sub>):** δ 7.81 (d, *J* = 9.7 Hz, 2H), 7.56 (t, *J* = 8.5 Hz, 1H), 7.38-7.32 (m, 1H), 5.11 (s, 2H), 2.63 (s, 3H).

**<sup>13</sup>C NMR (101 MHz, CDCl<sub>3</sub>):** δ 157.3, 154.0, 132.9, 132.5, 130.0, 129.1, 124.2, 113.9, 21.6.

**HRMS (ESI) m/z:** [C<sub>22</sub>H<sub>18</sub>N<sub>2</sub>O<sub>3</sub>+H]<sup>+</sup> calcd.:176.0819; found: 176.0813.

**1-Amino-3,6,7-trimethylquinoxalin-2(1H)-one (4i):**

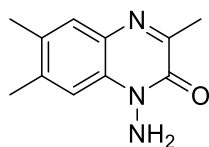

Light yellow solid (65% yield).

**M.p.:** 179-181 °C.

**<sup>1</sup>H NMR (400 MHz, DMSO-*d*<sub>6</sub>):** δ 7.53 (s, 1H), 7.49 (s, 1H), 6.07 (s, 2H), 2.43 (s, 3H), 2.35 (s, 3H), 2.28 (s, 3H).

**<sup>13</sup>C NMR (101 MHz, DMSO-*d*<sub>6</sub>):** δ 155.2, 152.4, 138.9, 132.0, 130.6, 130.2, 128.2, 114.4, 21.1, 20.0, 18.9.

**HRMS (ESI) m/z:** [C<sub>22</sub>H<sub>18</sub>N<sub>2</sub>O<sub>3</sub>+H]<sup>+</sup> calcd.: 204.1132; found: 204.1128.

**1-Amino-6,7-difluoro-3-methylquinoxalin-2(1*H*)-one (4j):**

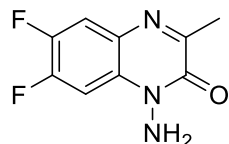

White solid (47% yield).

**M.p.:** 166-168 °C.

**<sup>1</sup>H NMR (400 MHz, DMSO-*d*<sub>6</sub>):** δ 7.82 (dd, *J* = 10.9, 8.2 Hz, 1H), 7.70 (dd, *J* = 12.0, 7.8 Hz, 1H), 6.06 (s, 2H), 2.44 (s, 3H).

**<sup>19</sup>F NMR (376 MHz, DMSO-*d*<sub>6</sub>):** δ -133.8, -143.8.

**<sup>13</sup>C NMR (101 MHz, DMSO-*d*<sub>6</sub>):** δ 158.2, 153.0, 150.3 (dd, *J* = 252.5, 14.1 Hz), 147.2 (d, *J* = 248.0, 14.1 Hz), 130.9 (d, *J* = 10.1 Hz), 128.2 (d, *J* = 8.1 Hz), 116.2 (d, *J* = 18.2 Hz), 103.1 (d, *J* = 23.2 Hz), 21.4.

**HRMS (ESI) m/z:** [C<sub>22</sub>H<sub>18</sub>N<sub>2</sub>O<sub>3</sub>+H]<sup>+</sup> calcd.: 212.0630; found: 212.0628.

**1-Amino-6,7-dichloro-3-methylquinoxalin-2(1*H*)-one (4k):**

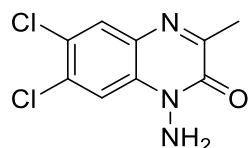

Red solid (56% yield).

**M.p.:** 239-241 °C.

**<sup>1</sup>H NMR (400 MHz, DMSO-*d*<sub>6</sub>):** δ 7.99 (s, 1H), 7.93 (s, 1H), 6.11 (s, 2H), 2.47 (s, 3H).

**<sup>13</sup>C NMR (101 MHz, DMSO-*d*<sub>6</sub>):** δ 159.2, 152.6, 132.9, 131.8, 131.0, 129.2, 125.2, 115.8, 21.3.

**HRMS (ESI) m/z:** [C<sub>22</sub>H<sub>18</sub>N<sub>2</sub>O<sub>3</sub>+H]<sup>+</sup> calcd.: 244.0039; found: 244.0041.

**1-Amino-3-(but-3-en-1-yl)quinoxalin-2(1*H*)-one (4l):**

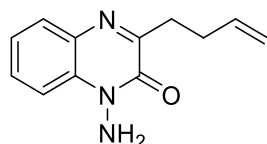

White solid (70% yield).

**M.p.:** 84-86 °C.

**<sup>1</sup>H NMR (400 MHz, CDCl<sub>3</sub>):** δ 7.82 (d, *J* = 7.9 Hz, 1H), 7.78 (d, *J* = 8.6 Hz, 1H), 7.53 (t, *J* = 7.2 Hz, 1H), 7.34 (t, *J* = 7.6 Hz, 1H), 5.93 (ddt, *J* = 16.9, 10.1, 6.5 Hz, 1H), 5.15–5.06 (m, 3H), 4.99 (d, *J* = 10.2 Hz, 1H), 3.08–3.02 (m, 2H), 2.60–2.52 (m, 2H).

**<sup>13</sup>C NMR (101 MHz, CDCl<sub>3</sub>):** δ 159.2, 153.6, 137.6, 132.7, 132.5, 130.0, 129.3, 124.0, 115.4, 113.9, 33.4, 30.7.

**HRMS (ESI) m/z:** [C<sub>22</sub>H<sub>18</sub>N<sub>2</sub>O<sub>3</sub>+H]<sup>+</sup> calcd.: 216.1132; found: 216.1126.

**1-Amino-3-(trifluoromethyl)-8,8a-dihydroquinoxalin-2(1H)-one (4m):**

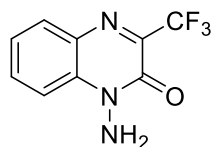

White solid (61% yield).

**M.p.:** 157-159 °C.

**<sup>1</sup>H NMR (400 MHz, DMSO-*d*<sub>6</sub>):** δ 7.87 (t, *J* = 8.0 Hz, 2H), 7.76 (t, *J* = 7.8 Hz, 1H), 7.41 (t, *J* = 7.6 Hz, 1H), 6.34 (s, 2H).

**<sup>13</sup>C NMR (101 MHz, DMSO-*d*<sub>6</sub>):** δ 149.7, 141.8 (q, *J* = 32.3 Hz), 134.3, 133.6, 130.3, 130.0, 124.4, 121.6 (q, *J* = 277.8 Hz), 114.9.

**<sup>19</sup>F NMR (376 MHz, DMSO-*d*<sub>6</sub>):** δ -68.6.

**HRMS (ESI) m/z:** [C<sub>22</sub>H<sub>18</sub>N<sub>2</sub>O<sub>3</sub>+H]<sup>+</sup> calcd.: 230.0536; found: 230.0533.

**1-Amino-3,4-dihydroquinolin-2(1H)-one (6):**

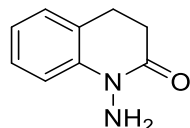

White solid (29% yield).

**M.p.:** 139-141 °C.

**<sup>1</sup>H NMR (400 MHz, CDCl<sub>3</sub>):** δ 7.56 (d, *J* = 8.4 Hz, 1H), 7.29–7.24 (m, 1H), 7.00 (t, *J* = 7.5 Hz, 1H), 4.50 (s, 2H), 2.91 (dd, *J* = 8.7, 6.2 Hz, 2H), 2.71 (dd, *J* = 8.6, 6.3 Hz, 2H).

**<sup>13</sup>C NMR (101 MHz, CDCl<sub>3</sub>):** δ 169.2, 140.2, 127.6, 127.6, 124.7, 123.2, 115.0, 31.1, 25.1.

**HRMS (ESI) m/z:** [C<sub>22</sub>H<sub>18</sub>N<sub>2</sub>O<sub>3</sub>+H]<sup>+</sup> calcd.: 163.0866; found: 163.0865.

**1-Amino-6-phenylpyridin-2(1H)-one (8):**

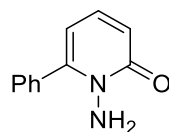

White solid (47% yield).

**M.p.:** 137-139 °C.

**<sup>1</sup>H NMR (400 MHz, CDCl<sub>3</sub>):** δ 7.53–7.44 (m, 5H), 7.35 (dd, *J* = 9.1, 7.0 Hz, 1H), 6.64 (d, *J* = 8.6 Hz, 1H), 6.18 (d, *J* = 7.0 Hz, 1H), 5.29 (s, 2H).

**<sup>13</sup>C NMR (101 MHz, CDCl<sub>3</sub>):** δ 161.0, 148.0, 137.8, 133.8, 129.6, 129.0, 128.5, 117.2, 107.6.

**HRMS (ESI) m/z:** [C<sub>22</sub>H<sub>18</sub>N<sub>2</sub>O<sub>3</sub>+H]<sup>+</sup> calcd.: 187.0866; found: 187.0859.

Typical procedure for synthesis substrate **2**<sup>1</sup>

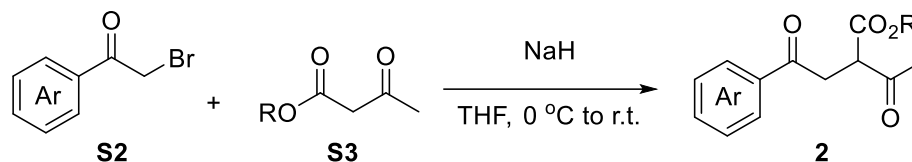

To a solution of sodium hydride (60% dispersion in mineral oil, 25.1 mmol) in 20 mL anhydrous tetrahydrofuran (THF) was slowly added the solution of methyl acetoacetate **S3** (25 mmol) in 20 mL THF at 0 °C. The reaction mixture was stirred at 0 °C for 0.5 h. Then a solution of **S2** (25.1 mmol) in 10 mL THF was added to the mixture, which was stirred at room temperature for another 12 h. After the completion of the reaction which was indicated by TLC, the reaction mixture was quenched with H<sub>2</sub>O and the aqueous layer was extracted with EtOAc (3 × 50 mL). The combined organic layers were dried over anhydrous Na<sub>2</sub>SO<sub>4</sub> and then concentrated under reduced pressure. The residue was purified through flash column chromatography on silica gel to afford pure product **2**.

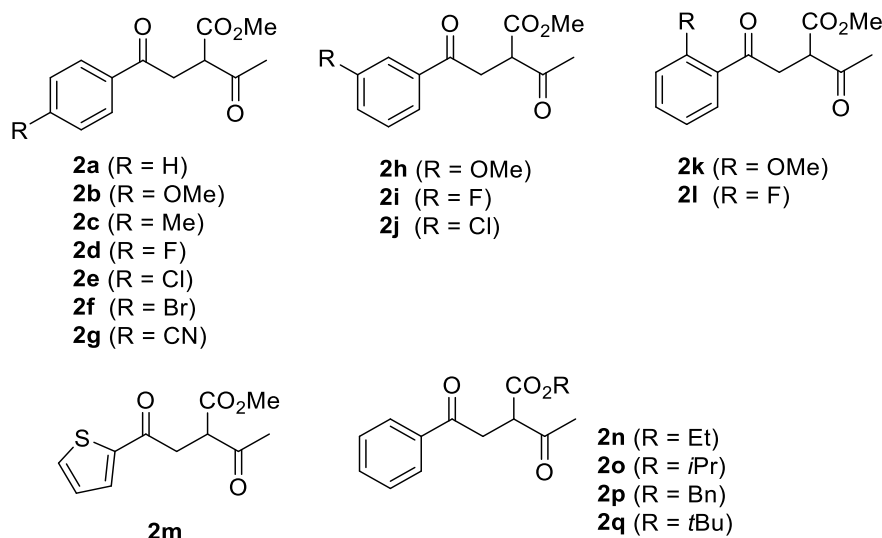

The 1,4-diketone substrates were prepared according to the procedure in the reported literature. Substrates **2a**<sup>1</sup>, **2b**<sup>2</sup>, **2c-2f**<sup>1</sup>, **2h**<sup>3</sup>, **2i-2j**<sup>1</sup>, **2l**<sup>4</sup>, **2m**<sup>1</sup>, **2n**<sup>5</sup>, **2o**<sup>4</sup>, **2p**<sup>5</sup> and **2q**<sup>6</sup> were known compounds.

Characterization of the new compounds is shown below:

**Methyl 2-acetyl-4-(4-cyanophenyl)-4-oxobutanoate (2g):**

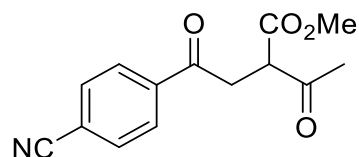

White solid (44% yield).

**M.p.:** 106-108 °C.

**<sup>1</sup>H NMR (400 MHz, CDCl<sub>3</sub>):** δ 8.04 (d, *J* = 8.4 Hz, 2H), 7.76 (d, *J* = 8.4 Hz, 2H), 4.21 (dd, *J* = 8.2, 5.5 Hz, 1H), 3.76 (s, 3H), 3.69 (dd, *J* = 18.5, 8.2 Hz, 1H), 3.47 (dd, *J* = 18.5, 5.5 Hz, 1H), 2.42 (s, 3H).

$^{13}\text{C}$  NMR (101 MHz,  $\text{CDCl}_3$ ):  $\delta$  201.9, 196.0, 169.1, 139.0, 132.6, 128.6, 117.9, 116.8, 53.6, 53.0, 37.6, 30.3.

HRMS (ESI)  $m/z$ :  $[\text{C}_{22}\text{H}_{18}\text{N}_2\text{O}_3+\text{H}]^+$  calcd.: 260.0918; found: 260.0920.

### Methyl 2-acetyl-4-(2-methoxyphenyl)-4-oxobutanoate (2k):

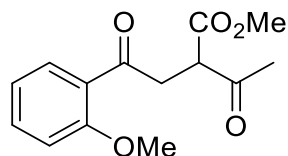

White solid (68% yield).

M.p.: 62-64 °C.

$^1\text{H}$  NMR (400 MHz,  $\text{CDCl}_3$ ):  $\delta$  7.73 (dd,  $J = 7.8, 1.7$  Hz, 1H), 7.45 (ddd,  $J = 8.4, 7.4, 1.9$  Hz, 1H), 6.99–6.92 (m, 2H), 4.17 (dd,  $J = 8.0, 5.8$  Hz, 1H), 3.89 (s, 3H), 3.73 (s, 3H), 3.69 (dd,  $J = 19.0, 8.1$  Hz, 1H), 3.54 (dd,  $J = 19.0, 5.8$  Hz, 1H), 2.38 (s, 3H).

$^{13}\text{C}$  NMR (101 MHz,  $\text{CDCl}_3$ ):  $\delta$  202.9, 198.3, 169.8, 159.2, 134.3, 130.7, 126.5, 120.6, 111.7, 55.6, 54.1, 52.6, 42.8, 30.2.

HRMS (ESI)  $m/z$ :  $[\text{C}_{22}\text{H}_{18}\text{N}_2\text{O}_3+\text{H}]^+$  calcd.: 265.1071; found: 265.1065.

## (3) Synthesis and Characterization of Products 3 and 5

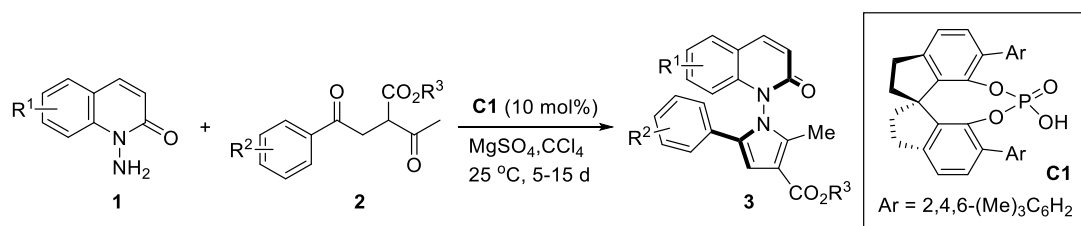

### General Procedure A:

To a flame dried Schlenk tube were added **1** (0.1 mmol), **C1** (5.5 mg, 0.01 mmol),  $\text{MgSO}_4$  (100 mg), anhydrous  $\text{CCl}_4$  (1.0 mL) and **2** (0.12 mmol). The resulting reaction mixture was stirred at 25 °C for 5-15 d. Then the solution was concentrated under vacuum and the mixture was purified through column chromatography to afford the pure product **3**.

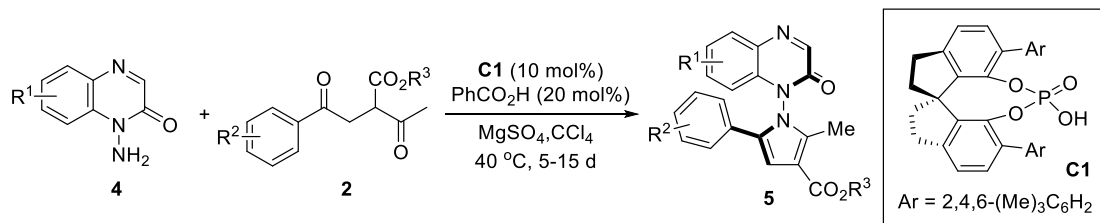

### General Procedure B:

To a flame dried Schlenk tube were added **4** (0.1 mmol), **C1** (5.5 mg, 0.01 mmol),  $\text{MgSO}_4$  (100 mg),  $\text{PhCO}_2\text{H}$  (0.02 mmol), anhydrous  $\text{CCl}_4$  (1.0 mL) and **2** (0.12 mmol). The resulting reaction mixture was stirred at 40 °C for 5-15 d. Then the solution was concentrated under vacuum and the mixture was purified through column

chromatography to afford the pure product **5**.

**Methyl (S)-2-methyl-1-(2-oxoquinolin-1(2H)-yl)-5-phenyl-1H-pyrrole-3-carboxylate (3a):**

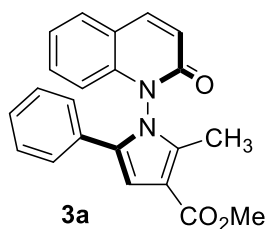

To a flame dried Schlenk tube were added **1a** (16.0 mg, 0.1 mmol), **C1** (5.5 mg, 0.01 mmol), MgSO<sub>4</sub> (100 mg), anhydrous CCl<sub>4</sub> (1.0 mL) and **2a** (28.0 mg, 0.12 mmol). The resulting reaction mixture was stirred at 25 °C for 5 d. Then the solution was concentrated under vacuum and the mixture was purified through column chromatography (PE/EA = 5/1) to afford the product **3a** in 98% yield (36.4 mg) as a white solid.

**M.p.:** 76-78 °C

**IR** (film)  $\nu_{\max}/\text{cm}^{-1}$ : 2947, 1705, 1680, 1597, 1496, 1446, 1251, 1208, 835.

**<sup>1</sup>H NMR** (400 MHz, CDCl<sub>3</sub>):  $\delta$  7.76 (d, *J* = 9.7 Hz, 1H), 7.55 (d, *J* = 6.4 Hz, 1H), 7.41 (t, *J* = 7.2 Hz, 1H), 7.25–7.19 (m, 3H), 7.18–7.11 (m, 3H), 6.89 (s, 1H), 6.76 (d, *J* = 9.7 Hz, 1H), 6.36 (d, *J* = 8.4 Hz, 1H), 3.87 (s, 3H), 2.26 (s, 3H).

**<sup>13</sup>C NMR** (101 MHz, CDCl<sub>3</sub>):  $\delta$  165.4, 160.3, 141.0, 140.6, 137.0, 133.2, 131.9, 130.1, 128.8, 128.6, 127.9, 127.7, 124.0, 121.4, 120.0, 113.0, 112.3, 108.9, 51.3, 10.4.

**HRMS (ESI) m/z**: [C<sub>22</sub>H<sub>18</sub>N<sub>2</sub>O<sub>3</sub>+H]<sup>+</sup> calcd.: 359.1390; found: 359.1381.

**Optical Rotation**:  $[\alpha]_D^{28} = +3.9$  (*c* = 0.1, CHCl<sub>3</sub>) [91% *ee*].

**Chiral HPLC**: 91% *ee* [Chiral MD (2), 250×4.6, *i*-PrOH/*n*-heptane = 25/75, 0.8 mL/min, 254 nm, *t*<sub>R</sub> = 10.12 min (major), 17.15 min (minor)].

**Methyl (S)-5-(4-methoxyphenyl)-2-methyl-1-(2-oxoquinolin-1(2H)-yl)-1H-pyrrole-3-carboxylate (3b):**

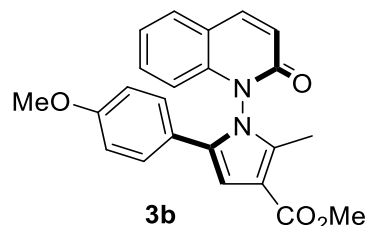

To a flame dried Schlenk tube were added **1a** (16.0 mg, 0.1 mmol), **C1** (5.5 mg, 0.01 mmol), MgSO<sub>4</sub> (100 mg), anhydrous CCl<sub>4</sub> (1.0 mL) and **2b** (26.4 mg, 0.12 mmol). The resulting reaction mixture was stirred at 25 °C for 9 d. Then the solution was concentrated under vacuum and the mixture was purified through column chromatography (PE/EA = 5/1) to afford the product **3b** in 98% yield (38.0 mg) as a faint yellow solid.

**M.p.:** 132-134 °C

**IR** (film)  $\nu_{\max}/\text{cm}^{-1}$ : 2974, 1708, 1681, 1598, 1448, 1243, 1219, 1071, 828, 753, 698.

**<sup>1</sup>H NMR (400 MHz, CDCl<sub>3</sub>):** δ 7.75 (d, *J* = 9.7 Hz, 1H), 7.54 (d, *J* = 7.7 Hz, 1H), 7.40 (t, *J* = 7.9 Hz, 1H), 7.22 (t, *J* = 7.6 Hz, 1H), 7.14 (d, *J* = 8.7 Hz, 2H), 6.80 (s, 1H), 6.76 (d, *J* = 9.7 Hz, 1H), 6.67 (d, *J* = 8.7 Hz, 2H), 6.34 (d, *J* = 8.4 Hz, 1H), 3.86 (s, 3H), 3.68 (s, 3H), 2.25 (s, 3H).

**<sup>13</sup>C NMR (101 MHz, CDCl<sub>3</sub>):** δ 165.5, 160.4, 159.3, 141.0, 140.6, 136.5, 133.0, 131.9, 129.2, 128.8, 123.9, 122.6, 121.4, 120.0, 114.0, 113.0, 112.1, 108.2, 55.2, 51.3, 10.4.

**HRMS (ESI) m/z:** [C<sub>23</sub>H<sub>20</sub>N<sub>2</sub>O<sub>4</sub>+H]<sup>+</sup> calcd.: 389.1496; found: 389.1489.

**Optical Rotation:** [α]<sub>D</sub><sup>28</sup> = +7.9 (*c* = 0.1, CHCl<sub>3</sub>) [85% *ee*].

**Chiral HPLC:** 87% *ee* [Chiral MD(2), 250×4.6, *i*-PrOH/*n*-heptane = 20/80, 0.8 mL/min, 254 nm, t<sub>R</sub> = 20.43 min (major), 33.24 min (minor)].

**Methyl (S)-2-methyl-1-(2-oxoquinolin-1(2H)-yl)-5-(p-tolyl)-1H-pyrrole-3-carboxylate (3c):**

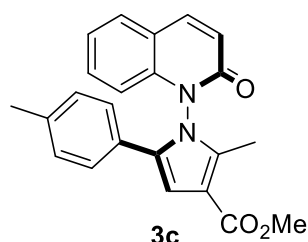

To a flame dried Schlenk tube were added **1a** (16.0 mg, 0.1 mmol), **C1** (5.5 mg, 0.01 mmol), MgSO<sub>4</sub> (100 mg), anhydrous CCl<sub>4</sub> (1.0 mL) and **2c** (30.0 mg, 0.12 mmol). The resulting reaction mixture was stirred at 25 °C for 9 d. Then the solution was concentrated under vacuum and the mixture was purified through column chromatography (PE/EA = 5/1) to afford the product **3c** in 97% yield (35.9 mg) as a faint yellow solid.

**M.p.:** 131-133 °C.

**IR (film)** ν<sub>max</sub>/cm<sup>-1</sup>: 2948, 1708, 1683, 1598, 1448, 1243, 1219, 828.

**<sup>1</sup>H NMR (400 MHz, CDCl<sub>3</sub>):** δ 7.76 (d, *J* = 9.7 Hz, 1H), 7.55 (d, *J* = 7.8 Hz, 1H), 7.44–7.37 (m, 1H), 7.25–7.19 (m, 1H), 7.11 (d, *J* = 8.2 Hz, 2H), 6.95 (d, *J* = 7.9 Hz, 2H), 6.85 (s, 1H), 6.77 (d, *J* = 9.6 Hz, 1H), 6.36 (d, *J* = 8.4 Hz, 1H), 3.87 (s, 3H), 2.25 (s, 3H), 2.20 (s, 3H).

**<sup>13</sup>C NMR (101 MHz, CDCl<sub>3</sub>):** δ 165.5, 160.4, 141.0, 140.7, 137.8, 136.7, 133.3, 131.9, 129.3, 128.8, 127.6, 127.2, 124.0, 121.4, 120.0, 113.0, 112.2, 108.5, 51.3, 21.2, 10.4.

**HRMS (ESI) m/z:** [C<sub>23</sub>H<sub>20</sub>N<sub>2</sub>O<sub>3</sub>+H]<sup>+</sup> calcd.: 373.1547; found: 373.1542.

**Optical Rotation:** [α]<sub>D</sub><sup>28</sup> = +7.7 (*c* = 0.1, CHCl<sub>3</sub>) [82% *ee*].

**Chiral HPLC:** 82% *ee* [Chiral MD(2), 250×4.6, *i*-PrOH/*n*-heptane = 20/80, 0.8 mL/min, 254 nm, t<sub>R</sub> = 11.62 min (major), 19.53 min (minor)].

**Methyl (S)-5-(4-fluorophenyl)-2-methyl-1-(2-oxoquinolin-1(2H)-yl)-1H-pyrrole-3-carboxylate (3d):**

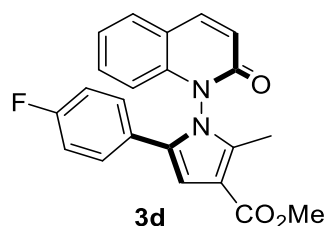

To a flame dried Schlenk tube were added **1a** (16.0 mg, 0.1 mmol), **C1** (5.5 mg, 0.01 mmol), MgSO<sub>4</sub> (100 mg), anhydrous CCl<sub>4</sub> (1.0 mL) and **2d** (30.3 mg, 0.12 mmol). The resulting reaction mixture was stirred at 25 °C for 6 d. Then the solution was concentrated under vacuum and the mixture was purified through column chromatography (PE/EA = 5/1) to afford the product **3d** in 85% yield (32.0 mg) as a faint yellow solid.

**M.p.:** 121-123 °C.

**IR** (film)  $\nu_{\max}/\text{cm}^{-1}$ : 2948, 1708, 1685, 1599, 1439, 1401, 1220, 829, 752.

**<sup>1</sup>H NMR** (400 MHz, CDCl<sub>3</sub>):  $\delta$  7.76 (d,  $J$  = 9.6 Hz, 1H), 7.55 (d,  $J$  = 7.8 Hz, 1H), 7.41 (t,  $J$  = 8.6 Hz, 1H), 7.25–7.15 (m, 3H), 6.87–6.80 (m, 3H), 6.75 (d,  $J$  = 9.7 Hz, 1H), 6.33 (d,  $J$  = 8.4 Hz, 1H), 3.86 (s, 3H), 2.25 (s, 3H).

**<sup>13</sup>C NMR** (101 MHz, CDCl<sub>3</sub>):  $\delta$  165.3, 162.5 (d,  $J$  = 249.5 Hz), 160.3, 141.1, 140.5, 136.9, 132.2, 131.9, 129.8 (d,  $J$  = 10.1 Hz), 128.9, 126.2 (d,  $J$  = 3.0 Hz), 124.1, 121.2, 120.0, 115.6 (d,  $J$  = 21.2 Hz), 112.8, 112.2, 108.9, 51.3, 10.4.

**<sup>19</sup>F NMR** (376 MHz, CDCl<sub>3</sub>):  $\delta$  -113.4.

**HRMS (ESI) m/z:** [C<sub>22</sub>H<sub>17</sub>FN<sub>2</sub>O<sub>3</sub>+H]<sup>+</sup> calcd.: 377.1296; found: 377.1288.

**Optical Rotation:**  $[\alpha]_D^{28} = +9.6$  ( $c$  = 0.1, CHCl<sub>3</sub>) [92% *ee*].

**Chiral HPLC:** 92% *ee* [Chiral ND(2), 250×4.6, *i*-PrOH/*n*-heptane = 20/80, 0.8 mL/min, 254 nm,  $t_R$  = 11.46 min (major), 14.41 min (minor)].

**Methyl (S)-5-(4-chlorophenyl)-2-methyl-1-(2-oxoquinolin-1(2H)-yl)-1H-pyrrole-3-carboxylate (3e):**

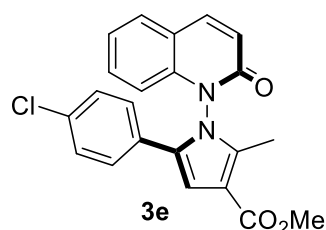

To a flame dried Schlenk tube were added **1a** (16.0 mg, 0.1 mmol), **C1** (5.5 mg, 0.01 mmol), MgSO<sub>4</sub> (100 mg), anhydrous CCl<sub>4</sub> (1.0 mL) and **2e** (32.0 mg, 0.12 mmol). The resulting reaction mixture was stirred at 25 °C for 12 d. Then the solution was concentrated under vacuum and the mixture was purified through column chromatography (PE/EA = 5/1) to afford the product **3e** in 94% yield (36.4 mg) as a faint yellow solid.

**M.p.:** 135-137 °C.

**IR** (film)  $\nu_{\max}/\text{cm}^{-1}$ : 3017, 2949, 1703, 1677, 1599, 1448, 1249, 1212, 843, 752.

**<sup>1</sup>H NMR** (400 MHz, CDCl<sub>3</sub>):  $\delta$  7.78 (d,  $J$  = 9.7 Hz, 1H), 7.57 (d,  $J$  = 6.4 Hz, 1H), 7.41 (t,  $J$  = 7.2 Hz, 1H), 7.26–7.22 (m, 1H), 7.17–7.10 (m, 4H), 6.88 (s, 1H), 6.77 (d,  $J$  = 9.7



Hz, 1H), 6.32 (d,  $J = 8.4$  Hz, 1H), 3.87 (s, 3H), 2.25 (s, 3H).

**$^{13}\text{C}$  NMR (101 MHz,  $\text{CDCl}_3$ ):**  $\delta$  165.2, 160.3, 141.2, 140.5, 137.3, 133.9, 132.0, 128.98, 128.96, 128.90, 128.6, 124.2, 121.3, 120.1, 112.8, 112.5, 109.2, 51.4, 10.4.

**HRMS (ESI)  $m/z$ :**  $[\text{C}_{22}\text{H}_{17}\text{ClN}_2\text{O}_3+\text{H}]^+$  calcd.: 393.1001; found: 393.0997.

**Optical Rotation:**  $[\alpha]_D^{28} = +7.9$  ( $c = 0.1$ ,  $\text{CHCl}_3$ ) [88% *ee*].

**Chiral HPLC:** 89% *ee* [Chiral MD(2), 250 $\times$ 4.6, *i*-PrOH/*n*-heptane = 20/80, 0.8 mL/min, 254 nm,  $t_R = 12.83$  min (major), 23.70 min (minor)].

**Methyl (S)-5-(4-bromophenyl)-2-methyl-1-(2-oxoquinolin-1(2H)-yl)-1H-pyrrole-3-carboxylate (3f):**

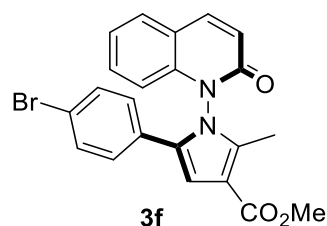

To a flame dried Schlenk tube were added **1a** (16.0 mg, 0.1 mmol), **C1** (5.5 mg, 0.01 mmol),  $\text{MgSO}_4$  (100 mg), anhydrous  $\text{CCl}_4$  (1.0 mL) and **2f** (37.6 mg, 0.12 mmol). The resulting reaction mixture was stirred at 25 °C for 16 d. Then the solution was concentrated under vacuum and the mixture was purified through column chromatography (PE/EA = 5/1) to afford the product **3f** in 90% yield (39.2 mg) as a white solid.

**M.p.:** 118-120 °C.

**IR (film)  $\nu_{\text{max}}/\text{cm}^{-1}$ :** 2944, 1712, 1681, 1598, 1440, 1245, 1217, 1067, 825, 775, 749.

**$^1\text{H}$  NMR (400 MHz,  $\text{CDCl}_3$ ):**  $\delta$  7.78 (d,  $J = 9.7$  Hz, 1H), 7.57 (d,  $J = 7.8$  Hz, 1H), 7.41 (t,  $J = 8.6$  Hz, 1H), 7.30–7.22 (m, 4H), 7.11–7.06 (m, 2H), 6.89 (s, 1H), 6.76 (d,  $J = 9.7$  Hz, 1H), 6.31 (d,  $J = 8.4$  Hz, 1H), 3.87 (s, 3H), 2.25 (s, 3H).

**$^{13}\text{C}$  NMR (101 MHz,  $\text{CDCl}_3$ ):**  $\delta$  165.2, 160.3, 141.2, 140.5, 137.4, 132.0, 131.8, 129.2, 129.1, 129.0, 124.2, 122.2, 121.3, 120.1, 112.8, 112.5, 109.2, 51.4, 10.4.

**HRMS (ESI)  $m/z$ :**  $[\text{C}_{22}\text{H}_{17}\text{BrN}_2\text{O}_3+\text{H}]^+$  calcd.: 437.0496; found: 437.0495.

**Optical Rotation:**  $[\alpha]_D^{28} = +5.6$  ( $c = 0.1$ ,  $\text{CHCl}_3$ ) [89% *ee*].

**Chiral HPLC:** 89% *ee* [Chiral MD(2), 250 $\times$ 4.6, *i*-PrOH/*n*-heptane = 20/80, 0.8 mL/min, 254 nm,  $t_R = 12.83$  min (major), 25.52 min (minor)].

**Methyl (S)-5-(4-cyanophenyl)-2-methyl-1-(2-oxoquinolin-1(2H)-yl)-1H-pyrrole-3-carboxylate (3g):**

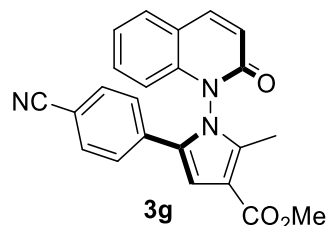

To a flame dried Schlenk tube were added **1a** (16.0 mg, 0.1 mmol), **C1** (5.5 mg, 0.01 mmol),  $\text{MgSO}_4$  (100 mg), anhydrous  $\text{CCl}_4$  (1.0 mL) and **2g** (31.0 mg, 0.12 mmol). The

resulting reaction mixture was stirred at 25 °C for 23 d. Then the solution was concentrated under vacuum and the mixture was purified through column chromatography (PE/EA = 5/1) to afford the product **3g** in 98% yield (34.4 mg) as a yellow solid.

**M.p.:** 150-152 °C.

**IR** (film)  $\nu_{\max}/\text{cm}^{-1}$ : 2942, 2222, 1712, 1678, 1601, 1521, 1439, 1221, 824, 770, 756.

**<sup>1</sup>H NMR** (400 MHz, CDCl<sub>3</sub>):  $\delta$  7.82 (d,  $J$  = 9.7 Hz, 1H), 7.61 (d,  $J$  = 7.8 Hz, 1H), 7.47–7.40 (m, 3H), 7.32–7.23 (m, 4H), 7.02 (s, 1H), 6.78 (d,  $J$  = 9.7 Hz, 1H), 6.33 (d,  $J$  = 8.4 Hz, 1H), 3.87 (s, 3H), 2.26 (s, 3H).

**<sup>13</sup>C NMR** (101 MHz, CDCl<sub>3</sub>):  $\delta$  164.9, 160.1, 141.4, 140.3, 138.6, 134.5, 132.6, 132.2, 131.1, 129.2, 127.4, 124.4, 121.2, 120.0, 118.6, 113.0, 112.5, 111.1, 110.8, 51.5, 10.4.

**HRMS (ESI) m/z:** [C<sub>23</sub>H<sub>17</sub>N<sub>3</sub>O<sub>2</sub>+H]<sup>+</sup> calcd.: 384.1343; found: 384.1334.

**Optical Rotation:**  $[\alpha]_D^{28} = +7.1$  ( $c$  = 0.1, CHCl<sub>3</sub>) [94% *ee*].

**Chiral HPLC:** 90% *ee* [Chiral MD(2), 250×4.6, *i*-PrOH/*n*-heptane = 35/65, 0.8 mL/min, 254 nm,  $t_R$  = 12.66min (major), 30.74 min (minor)].

**Methyl (S)-5-(3-methoxyphenyl)-2-methyl-1-(2-oxoquinolin-1(2H)-yl)-1H-pyrrole-3-carboxylate (3h):**

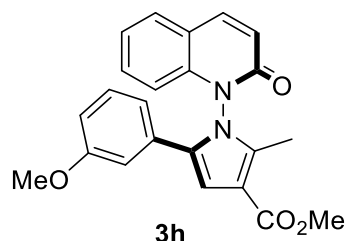

To a flame dried Schlenk tube were added **1a** (16.0 mg, 0.1 mmol), **C1** (5.5 mg, 0.01 mmol), MgSO<sub>4</sub> (100 mg), anhydrous CCl<sub>4</sub> (1.0 mL) and **2h** (31.7 mg, 0.12 mmol). The resulting reaction mixture was stirred at 25 °C for 13 d. Then the solution was concentrated under vacuum. Finally, the mixture was purified through column chromatography (PE/EA = 5/1) to afford the product **3h** in 93% yield (36.1 mg) as a white solid.

**M.p.:** 54-56 °C.

**IR** (film)  $\nu_{\max}/\text{cm}^{-1}$ : 1708, 1680, 1598, 1448, 1223, 1075, 773, 753.

**<sup>1</sup>H NMR** (400 MHz, CDCl<sub>3</sub>):  $\delta$  7.77 (d,  $J$  = 9.9 Hz, 1H), 7.57 (d,  $J$  = 7.8 Hz, 1H), 7.42 (t,  $J$  = 8.6 Hz, 1H), 7.26–7.21 (m, 1H), 7.06 (t,  $J$  = 8.0 Hz, 1H), 6.90 (s, 1H), 6.81 (dt,  $J$  = 7.7, 1.3 Hz, 1H), 6.78–6.75 (m, 2H), 6.68 (dd,  $J$  = 8.3, 2.6 Hz, 1H), 6.38 (d,  $J$  = 8.3 Hz, 1H), 3.87 (s, 3H), 3.58 (s, 3H), 2.27 (s, 3H).

**<sup>13</sup>C NMR** (101 MHz, CDCl<sub>3</sub>):  $\delta$  165.4, 160.3, 159.5, 141.1, 140.7, 137.2, 133.1, 132.0, 131.3, 129.7, 128.9, 124.0, 121.4, 120.1, 120.0, 114.4, 113.0, 112.3, 112.2, 109.0, 55.1, 51.3, 10.4.

**HRMS (ESI) m/z:** [C<sub>23</sub>H<sub>20</sub>N<sub>2</sub>O<sub>4</sub>+H]<sup>+</sup> calcd.: 389.1496; found: 389.1488.

**Optical Rotation:**  $[\alpha]_D^{28} = +1.0$  ( $c$  = 1.0, CHCl<sub>3</sub>) [84% *ee*].

**Chiral HPLC:** 84% *ee* [Chiral MD(2), 250×4.6, *i*-PrOH/*n*-heptane = 20/80, 0.8 mL/min, 254 nm,  $t_R$  = 16.52 min (major), 27.38 min (minor)].

**Methyl (*S*)-5-(3-fluorophenyl)-2-methyl-1-(2-oxoquinolin-1(2*H*)-yl)-1*H*-pyrrole-3-carboxylate (**3i**):**

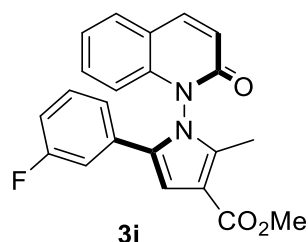

To a flame dried Schlenk tube were added **1a** (16.0 mg, 0.1 mmol), **C1** (5.5 mg, 0.01 mmol), MgSO<sub>4</sub> (100 mg), anhydrous CCl<sub>4</sub> (1.0 mL) and **2i** (30.3 mg, 0.12 mmol). The resulting reaction mixture was stirred at 25 °C for 5 d. Then the solution was concentrated under vacuum and the mixture was purified through column chromatography (PE/EA = 5/1) to afford the product **3i** in 98% yield (36.8 mg) as a white solid.

**M.p.:** 53-55 °C.

**IR** (film)  $\nu_{\max}/\text{cm}^{-1}$ : 3066, 2948, 1709, 1681, 1598, 1448, 1222, 1075, 773, 752.

**<sup>1</sup>H NMR (400 MHz, CDCl<sub>3</sub>):**  $\delta$  7.79 (d, *J* = 9.7 Hz, 1H), 7.58 (d, *J* = 7.8 Hz, 1H), 7.42 (t, *J* = 8.6 Hz, 1H), 7.27–7.22 (m, 1H), 7.11 (td, *J* = 8.0, 6.1 Hz, 1H), 6.99 (d, *J* = 7.8 Hz, 1H), 6.93–6.89 (m, 2H), 6.82 (td, *J* = 8.2, 1.6 Hz, 1H), 6.77 (d, *J* = 9.7 Hz, 1H), 6.35 (d, *J* = 8.4 Hz, 1H), 3.87 (s, 3H), 2.26 (s, 3H).

**<sup>13</sup>C NMR (101 MHz, CDCl<sub>3</sub>):**  $\delta$  165.2, 163.7(d, *J* = 247.4 Hz), 160.2, 141.2, 140.4, 137.5, 132.1, 132.0, 131.8 (d, *J* = 2.0 Hz), 130.2(d, *J* = 10.1 Hz), 128.0, 124.2, 123.1(d, *J* = 3.0 Hz), 121.3, 120.0, 114.8(d, *J* = 20.2 Hz), 114.4(d, *J* = 30.3 Hz), 112.8, 112.5, 109.5, 51.4, 10.4.

**<sup>19</sup>F NMR (376 MHz, CDCl<sub>3</sub>):** -112.4.

**HRMS (ESI) m/z:** [C<sub>22</sub>H<sub>17</sub>FN<sub>2</sub>O<sub>3</sub>+H]<sup>+</sup> calcd: 377.1296; found: 377.1286

**Optical Rotation:**  $[\alpha]_D^{28} = +4.8$  (*c* = 1.0, CHCl<sub>3</sub>) [90% *ee*].

**Chiral HPLC:** 90% *ee* [Chiral MD(2), 250×4.6, *i*-PrOH/*n*-heptane = 20/80, 0.8 mL/min, 254 nm, *t<sub>R</sub>* = 12.44 min (major), 18.87 min (minor)].

**Methyl (*S*)-5-(3-chlorophenyl)-2-methyl-1-(2-oxoquinolin-1(2*H*)-yl)-1*H*-pyrrole-3-carboxylate (**3j**):**

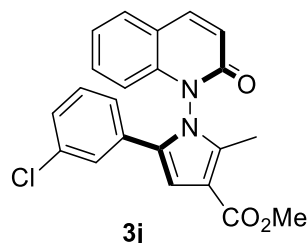

To a flame dried Schlenk tube were added **1a** (16.0 mg, 0.1 mmol), **C1** (5.5 mg, 0.01 mmol), MgSO<sub>4</sub> (100 mg), anhydrous CCl<sub>4</sub> (1.0 mL) and **2j** (32.3 mg, 0.12 mmol). The resulting reaction mixture was stirred at 25 °C for 13 d. Then the solution was

concentrated under vacuum and the mixture was purified through column chromatography (PE/EA = 5/1) to afford the product **3j** in 80% yield (36.4 mg) as a white solid.

**M.p.:** 60-62 °C.

**IR** (film)  $\nu_{\max}/\text{cm}^{-1}$ : 3063, 2947, 1709, 1681, 1599, 1439, 1244, 1219, 1074, 774, 752.

**<sup>1</sup>H NMR (400 MHz, CDCl<sub>3</sub>):**  $\delta$  7.79 (d,  $J$  = 9.3 Hz, 1H), 7.58 (d,  $J$  = 7.8 Hz, 1H), 7.43 (t,  $J$  = 8.6 Hz, 1H), 7.27–7.24 (m, 1H), 7.23–7.21 (m, 1H), 7.12–7.05 (m, 3H), 6.92 (s, 1H), 6.78 (d,  $J$  = 9.7 Hz, 1H), 6.34 (d,  $J$  = 8.4 Hz, 1H), 3.87 (s, 3H), 2.26 (s, 3H).

**<sup>13</sup>C NMR (101 MHz, CDCl<sub>3</sub>):**  $\delta$  165.2, 160.2, 141.2, 140.5, 137.6, 134.5, 132.1, 131.8, 131.6, 129.9, 129.0, 128.0, 127.6, 125.4, 124.2, 121.3, 120.0, 112.8, 112.5, 109.6, 51.4, 10.4.

**HRMS (ESI) m/z:** [C<sub>22</sub>H<sub>17</sub>ClN<sub>2</sub>O<sub>3</sub>+H]<sup>+</sup> calcd: 393.1001; found: 393.0995.

**Optical Rotation:**  $[\alpha]_D^{28} = +2.6$  ( $c = 1.0$ , CHCl<sub>3</sub>) [92% *ee*].

**Chiral HPLC:** 92 % *ee* [Chiral MD(2), 250×4.6, *i*-PrOH/*n*-heptane = 20/80, 0.8 mL/min, 254 nm,  $t_R = 13.27$  min (major), 21.30 min (minor)].

**Methyl (S)-5-(2-methoxyphenyl)-2-methyl-1-(2-oxoquinolin-1(2H)-yl)-1H-pyrrole-3-carboxylate (3k):**

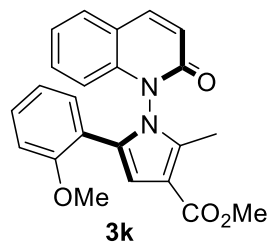

To a flame dried Schlenk tube were added **1a** (16.0 mg, 0.1 mmol), **C1** (5.5 mg, 0.01 mmol), MgSO<sub>4</sub> (100 mg), anhydrous CCl<sub>4</sub> (1.0 mL) and **2k** (32.0 mg, 0.12 mmol). The resulting reaction mixture was stirred at 25 °C for 9 d. Then the solution was concentrated under vacuum and the mixture was purified through column chromatography (PE/EA = 5/1) to afford the product **3k** in 80% yield (30.2 mg) as a white solid.

**M.p.:** 134-136 °C.

**IR** (film)  $\nu_{\max}/\text{cm}^{-1}$ : 3000, 2946, 2830, 1707, 1677, 1598, 1447, 1256, 1218, 1072, 766.

**<sup>1</sup>H NMR (400 MHz, CDCl<sub>3</sub>):**  $\delta$  7.67 (d,  $J$  = 9.7 Hz, 1H), 7.49 (d,  $J$  = 9.2 Hz, 1H), 7.43–7.37 (m, 1H), 7.21–7.15 (m, 2H), 7.15–7.10 (m, 1H), 6.85 (s, 1H), 6.74 (t,  $J$  = 7.5 Hz, 1H), 6.65–7.70 (m, 2H), 6.59 (d,  $J$  = 8.5 Hz, 1H), 3.86 (s, 3H), 3.50 (s, 3H), 2.28 (s, 3H).

**<sup>13</sup>C NMR (101 MHz, CDCl<sub>3</sub>):**  $\delta$  165.6, 160.0, 157.4, 140.6, 140.5, 136.5, 131.9, 131.1, 129.9, 129.0, 128.4, 123.6, 121.3, 120.3, 119.8, 118.9, 113.9, 111.9, 110.6, 110.5, 55.0, 51.2, 10.7.

**HRMS (ESI) m/z:** [C<sub>23</sub>H<sub>20</sub>N<sub>2</sub>O<sub>4</sub>+H]<sup>+</sup> calcd.: 389.1496; found: 389.1493.

**Optical Rotation:**  $[\alpha]_D^{28} = +2.4$  ( $c = 1.0$ , CHCl<sub>3</sub>) [90% *ee*].

**Chiral HPLC:** 90% *ee* [Chiral MD(2), 250×4.6, *i*-PrOH/*n*-heptane = 20/80, 0.8 mL/min, 254 nm,  $t_R = 17.72$  min (minor), 20.66 min (major)].

**Methyl (*S*)-5-(2-fluorophenyl)-2-methyl-1-(2-oxoquinolin-1(2*H*)-yl)-1*H*-pyrrole-3-carboxylate (**3l**):**

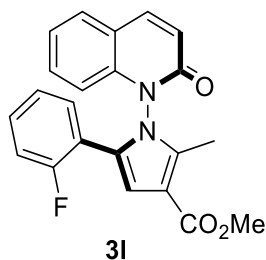

To a flame dried Schlenk tube were added **1a** (16.0 mg, 0.1 mmol), **C1** (5.5 mg, 0.01 mmol), MgSO<sub>4</sub> (100 mg), anhydrous CCl<sub>4</sub> (1.0 mL) and **2l** (30.3 mg, 0.12 mmol). The resulting reaction mixture was stirred at 25 °C for 16 d. Then the solution was concentrated under vacuum and the mixture was purified through column chromatography (PE/EA = 5/1) to afford the product **3l** in 94% yield (35.4 mg) as a white solid.

**M.p.:** 150-152 °C.

**IR** (film)  $\nu_{\max}/\text{cm}^{-1}$ : 2924, 1709, 1685, 1599, 1485, 1449, 1246, 1221, 753.

**<sup>1</sup>H NMR** (400 MHz, CDCl<sub>3</sub>):  $\delta$  7.73 (d, *J* = 9.7 Hz, 1H), 7.52 (d, *J* = 7.7 Hz, 1H), 7.44–7.38 (m, 1H), 7.24–7.16 (m, 2H), 7.15–7.09 (m, 1H), 6.96 (s, 1H), 6.94–6.88 (m, 2H), 6.73 (d, *J* = 9.7 Hz, 1H), 6.41 (d, *J* = 8.4 Hz, 1H), 3.86 (s, 3H), 2.28 (s, 3H).

**<sup>13</sup>C NMR** (101 MHz, CDCl<sub>3</sub>):  $\delta$  165.3, 160.3, 160.0 (d, *J* = 250.5 Hz), 141.0, 140.4, 137.2, 131.8, 130.7, 130.0 (d, *J* = 8.1 Hz), 128.7, 125.5, 124.0, 124.0, 121.2, 119.9, 117.8 (d, *J* = 14.1 Hz), 115.9 (d, *J* = 23.2 Hz), 113.0, 112.3, 111.5 (d, *J* = 3.0 Hz), 51.3, 10.5.

**<sup>19</sup>F NMR** (376 MHz, CDCl<sub>3</sub>):  $\delta$  -113.8.

**HRMS (ESI) m/z:** [C<sub>22</sub>H<sub>17</sub>FN<sub>2</sub>O<sub>3</sub>+H]<sup>+</sup> calcd.: 377.1296; found: 377.1289.

**Optical Rotation:**  $[\alpha]_D^{28} = +3.4$  (*c* = 1.0, CHCl<sub>3</sub>) [71% *ee*].

**Chiral HPLC:** 71% *ee* [Chiral MD(2), 250×4.6, *i*-PrOH/*n*-heptane = 10/90, 0.8 mL/min, 254 nm, *t*<sub>R</sub> = 22.11 min (major), 26.44 min (minor)].

**Methyl (*S*)-2-methyl-1-(2-oxoquinolin-1(2*H*)-yl)-5-(thiophen-2-yl)-1*H*-pyrrole-3-carboxylate (**3m**):**

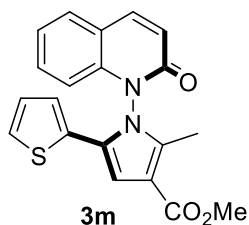

To a flame dried Schlenk tube were added **1a** (16.0 mg, 0.1 mmol), **C1** (5.5 mg, 0.01 mmol), MgSO<sub>4</sub> (100 mg), anhydrous CCl<sub>4</sub> (1.0 mL) and **2m** (28.8 mg, 0.12 mmol). The resulting reaction mixture was stirred at 25 °C for 9 d. Then the solution was concentrated under vacuum. Finally, the mixture was purified through column chromatography (PE/EA = 5/1) to afford the product **3m** in 91% yield (33.0 mg) as a

white solid.

**M.p.:** 78-80 °C.

**IR** (film)  $\nu_{\text{max}}/\text{cm}^{-1}$ : 2946, 1707, 1682, 1598, 1447, 1244, 1222, 1076, 828, 772, 753.

**<sup>1</sup>H NMR (400 MHz, CDCl<sub>3</sub>):**  $\delta$  7.84 (d,  $J = 9.7$  Hz, 1H), 7.64 (d,  $J = 9.2$  Hz, 1H), 7.44 (t,  $J = 8.6$  Hz, 1H), 7.29 (d,  $J = 8.5$  Hz, 1H), 7.04–6.99 (m, 2H), 6.82–6.77 (m, 3H), 6.47 (d,  $J = 7.5$  Hz, 1H), 3.87 (s, 3H), 2.27 (s, 3H).

**<sup>13</sup>C NMR (101 MHz, CDCl<sub>3</sub>):**  $\delta$  165.2, 160.0, 141.2, 140.5, 137.1, 132.0, 130.9, 129.0, 127.4, 126.1, 125.1, 124.6, 124.1, 121.5, 120.2, 112.9, 112.3, 109.0, 51.4, 10.4.

**HRMS (ESI) m/z:** [C<sub>20</sub>H<sub>16</sub>N<sub>2</sub>O<sub>3</sub>S+H]<sup>+</sup> calcd.: 365.0955; found: 365.0945.

**Optical Rotation:**  $[\alpha]_{\text{D}}^{28} = +4.8$  ( $c = 1.0$ , CHCl<sub>3</sub>) [88% *ee*].

**Chiral HPLC:** 88% *ee* [Chiral ND(2), 250×4.6, *i*-PrOH/*n*-heptane = 20/80, 0.8 mL/min, 254 nm,  $t_{\text{R}} = 19.07$  min (major), 48.76 min (minor)].

**Ethyl (S)-2-methyl-1-(2-oxoquinolin-1(2H)-yl)-5-(*o*-tolyl)-1H-pyrrole-3-carboxylate (3n):**

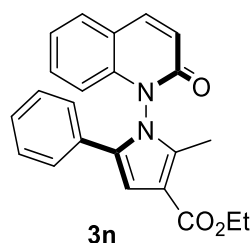

To a flame dried Schlenk tube were added **1a** (16.0 mg, 0.1 mmol), C1 (5.5 mg, 0.01 mmol), MgSO<sub>4</sub> (100 mg), anhydrous CCl<sub>4</sub> (1.0 mL) and **2n** (30.0 mg, 0.12 mmol). The resulting reaction mixture was stirred at 25 °C for 9 d. Then the solution was concentrated under vacuum and the mixture was purified through column chromatography (PE/EA = 5/1) to afford the product **3n** in 89% yield (33.0 mg) as a white solid.

**M.p.:** 138-140 °C.

**IR** (film)  $\nu_{\text{max}}/\text{cm}^{-1}$ : 3068, 2977, 1679, 1598, 1451, 1245, 1219, 1070, 829, 755, 697.

**<sup>1</sup>H NMR (400 MHz, CDCl<sub>3</sub>):**  $\delta$  7.76 (d,  $J = 9.6$  Hz, 1H), 7.55 (d,  $J = 9.2$  Hz, 1H), 7.44–7.38 (m, 1H), 7.25–7.19 (m, 3H), 7.18–7.11 (m, 3H), 6.90 (s, 1H), 6.77 (d,  $J = 9.7$  Hz, 1H), 6.38 (d,  $J = 8.3$  Hz, 1H), 4.38–4.31 (m, 2H), 2.26 (s, 3H), 1.38 (t,  $J = 7.1$  Hz, 3H).

**<sup>13</sup>C NMR (101 MHz, CDCl<sub>3</sub>):**  $\delta$  165.0, 160.4, 141.0, 140.6, 136.8, 133.1, 131.9, 130.2, 128.8, 128.6, 127.9, 127.7, 124.0, 121.4, 120.0, 113.0, 112.6, 109.0, 60.0, 14.6, 10.4.

**HRMS (ESI) m/z:** [C<sub>23</sub>H<sub>20</sub>N<sub>2</sub>O<sub>3</sub>+H]<sup>+</sup> calcd.: 373.1547; found: 373.1539.

**Optical Rotation:**  $[\alpha]_{\text{D}}^{28} = +10.8$  ( $c = 1.0$ , CHCl<sub>3</sub>) [88% *ee*].

**Chiral HPLC:** 88% *ee* [Chiral MD(2), 250×4.6, *i*-PrOH/*n*-heptane = 20/80, 0.8 mL/min, 254 nm,  $t_{\text{R}} = 11.49$  min (major), 15.72 min (minor)].

**Isopropyl (S)-2-methyl-1-(2-oxoquinolin-1(2H)-yl)-5-phenyl-1H-pyrrole-3-carboxylate (3o):**

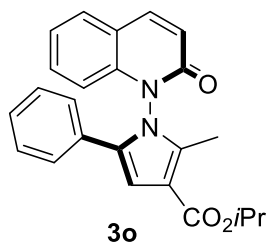

To a flame dried Schlenk tube were added **1a** (16.0 mg, 0.1 mmol), **C1** (5.5 mg, 0.01 mmol), MgSO<sub>4</sub> (100 mg), PhCOOH (1.2 mg, 0.01 mmol) anhydrous CCl<sub>4</sub> (1.0 mL) and **2o** (31.5 mg, 0.12 mmol). The resulting reaction mixture was stirred at 25 °C for 13 d. Then the solution was concentrated under vacuum and the mixture was purified through column chromatography (PE/EA = 5/1) to afford the product **3o** in 97% yield (37.5 mg) as a white solid.

**M.p.:** 118-120 °C.

**IR** (film)  $\nu_{\max}/\text{cm}^{-1}$ : 2977, 2930, 1705, 1672, 1599, 1447, 1246, 1220, 1063, 755.

**<sup>1</sup>H NMR (400 MHz, CDCl<sub>3</sub>):**  $\delta$  7.76 (d,  $J$  = 9.7 Hz, 1H), 7.55 (d,  $J$  = 9.1 Hz, 1H), 7.41 (t,  $J$  = 8.6 Hz, 1H), 7.25–7.20 (m, 3H), 7.18–7.11 (m, 3H), 6.90 (s, 1H), 6.77 (d,  $J$  = 9.7 Hz, 1H), 6.39 (d,  $J$  = 8.4 Hz, 1H), 5.23 (hept,  $J$  = 6.3 Hz, 1H), 2.26 (s, 3H), 1.36 (t,  $J$  = 6.4 Hz, 6H).

**<sup>13</sup>C NMR (101 MHz, CDCl<sub>3</sub>):**  $\delta$  164.6, 160.4, 141.0, 140.6, 136.6, 133.0, 131.9, 130.2, 128.8, 128.6, 127.8, 127.7, 124.0, 121.4, 120.0, 113.1, 113.0, 109.1, 67.2, 22.3, 10.5.

**HRMS (ESI) m/z:** [C<sub>24</sub>H<sub>22</sub>N<sub>2</sub>O<sub>3</sub>+H]<sup>+</sup> calcd.: 387.1703; found: 387.1698.

**Optical Rotation:**  $[\alpha]_D^{28} = +5.8$  ( $c$  = 1.0, CHCl<sub>3</sub>) [88% *ee*].

**Chiral HPLC:** 88% *ee* [Chiral NQ(2), 250×4.6, *i*-PrOH/*n*-heptane = 40/60, 0.8 mL/min, 254 nm,  $t_R$  = 14.97 min (major), 27.96min (minor)].

**Benzyl (S)-2-methyl-1-(2-oxoquinolin-1(2H)-yl)-5-phenyl-1H-pyrrole-3-carboxylate (3p):**

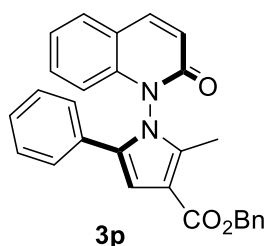

To a flame dried Schlenk tube were added **1a** (16.0 mg, 0.1 mmol), **C1** (5.5 mg, 0.01 mmol), MgSO<sub>4</sub> (100 mg), anhydrous CCl<sub>4</sub> (1.0 mL) and **2p** (37.2 mg, 0.12 mmol). The resulting reaction mixture was stirred at 25 °C for 13 d. Then the solution was concentrated under vacuum and the mixture was purified through column chromatography (PE/EA = 5/1) to afford the product **3p** in 86% yield (37.3 mg) as a white solid.

**M.p.:** 60-62 °C.

**IR** (film)  $\nu_{\max}/\text{cm}^{-1}$ : 2921, 1683, 1598, 1448, 1213, 1119, 1061, 828, 752, 696.

**<sup>1</sup>H NMR (400 MHz, CDCl<sub>3</sub>):**  $\delta$  7.76 (d,  $J$  = 9.7 Hz, 1H), 7.55 (d,  $J$  = 9.2 Hz, 1H), 7.47

(d,  $J = 6.7$  Hz, 2H), 7.44–7.37 (m, 3H), 7.36–7.30 (m, 1H), 7.25–7.20 (m, 3H), 7.16–7.12 (m, 3H), 6.93 (s, 1H), 6.77 (d,  $J = 9.7$  Hz, 1H), 6.38 (d,  $J = 8.4$  Hz, 1H), 5.35 (s, 2H), 2.27 (s, 3H).

$^{13}\text{C}$  NMR (101 MHz,  $\text{CDCl}_3$ ):  $\delta$  164.7, 160.3, 141.0, 140.6, 137.2, 136.7, 133.2, 131.9, 130.1, 128.8, 128.7, 128.6, 128.3, 128.2, 127.9, 127.7, 124.0, 121.4, 120.0, 113.0, 112.2, 109.0, 65.8, 10.5.

HRMS (ESI)  $m/z$ : [ $\text{C}_{28}\text{H}_{22}\text{N}_2\text{O}_3 + \text{H}$ ] $^+$  calcd.: 435.1703; found: 435.1699.

Optical Rotation:  $[\alpha]_D^{28} = +3.3$  ( $c = 1.0$ ,  $\text{CHCl}_3$ ) [84%  $ee$ ].

Chiral HPLC: 84%  $ee$  [Chiral MD(2),  $250 \times 4.6$ ,  $i\text{-PrOH}/n\text{-heptane} = 20/80$ , 0.8 mL/min, 254 nm,  $t_R = 16.96$  min (major), 25.06 min (minor)].

***tert*-Butyl (S)-2-methyl-1-(2-oxoquinolin-1(2H)-yl)-5-phenyl-1H-pyrrole-3-carboxylate (3q):**

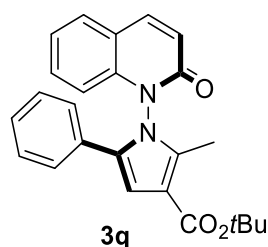

To a flame dried Schlenk tube were added **1a** (16.0 mg, 0.1 mmol), **C1** (5.5 mg, 0.01 mmol),  $\text{MgSO}_4$  (100 mg),  $\text{PhCOOH}$  (1.2 mg, 0.01 mmol), anhydrous  $\text{CCl}_4$  (1.0 mL) and **2q** (33.2 mg, 0.12 mmol). The resulting reaction mixture was stirred at 25 °C for 13 d. Then the solution was concentrated under vacuum and the mixture was purified through column chromatography (PE/EA = 5/1) to afford the product **3q** in 97% yield (38.7 mg) as a white solid.

M.p.: 145–147 °C.

IR (film)  $\nu_{\text{max}}/\text{cm}^{-1}$ : 3068, 2971, 1706, 1678, 1599, 1450, 1246, 1156, 1065, 834, 751, 699.

$^1\text{H}$  NMR (400 MHz,  $\text{CDCl}_3$ ):  $\delta$  7.75 (d,  $J = 9.5$  Hz, 1H), 7.54 (d,  $J = 9.2$  Hz, 1H), 7.41 (t,  $J = 8.6$  Hz, 1H), 7.24–7.19 (m, 3H), 7.17–7.11 (m, 3H), 6.85 (s, 1H), 6.77 (d,  $J = 9.7$  Hz, 1H), 6.39 (d,  $J = 8.5$  Hz, 1H), 2.24 (s, 3H), 1.59 (s, 9H).

$^{13}\text{C}$  NMR (101 MHz,  $\text{CDCl}_3$ ):  $\delta$  164.4, 160.4, 141.0, 140.6, 136.1, 132.7, 131.9, 130.3, 128.8, 128.6, 127.8, 127.6, 123.9, 121.4, 120.0, 114.1, 113.1, 109.2, 80.2, 28.5, 10.4.

HRMS (ESI)  $m/z$ : [ $\text{C}_{25}\text{H}_{24}\text{N}_2\text{O}_3 + \text{H}$ ] $^+$  calcd.: 401.1860; found: 401.1862.

Optical Rotation:  $[\alpha]_D^{28} = +5.0$  ( $c = 1.0$ ,  $\text{CHCl}_3$ ) [86%  $ee$ ].

Chiral HPLC: 86%  $ee$  [Chiral NQ (2),  $250 \times 4.6$ ,  $i\text{-PrOH}/n\text{-heptane} = 35/65$ , 0.8 mL/min, 254 nm,  $t_R = 12.28$  min (major), 43.68 min (minor)].

**Methyl (S)-1-(6-fluoro-2-oxoquinolin-1(2H)-yl)-2-methyl-5-phenyl-1H-pyrrole-3-carboxylate (3r):**



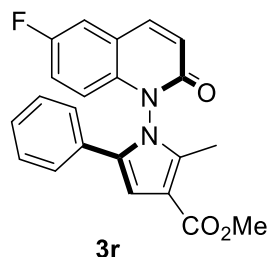

To a flame dried Schlenk tube were added **1r** (17.8 mg, 0.1 mmol), **C1** (5.5 mg, 0.01 mmol), MgSO<sub>4</sub> (100 mg), anhydrous CCl<sub>4</sub> (1.0 mL) and **2a** (28.0 mg, 0.12 mmol). The resulting reaction mixture was stirred at 25 °C for 7 d. Then the solution was concentrated under vacuum and the mixture was purified through column chromatography (PE/EA = 5/1) to afford the product **3r** in 60% yield (22.6 mg) as a white solid.

**M.p.:** 100-102 °C.

**IR** (film)  $\nu_{\max}/\text{cm}^{-1}$ : 3064, 2949, 2923, 1708, 1672, 1570, 1438, 1220, 1070, 886, 811, 759.

**<sup>1</sup>H NMR** (400 MHz, CDCl<sub>3</sub>):  $\delta$  7.70 (d,  $J$  = 9.7 Hz, 1H), 7.25–7.19 (m, 3H), 7.18 – 7.09 (m, 4H), 6.88 (s, 1H), 6.82 (d,  $J$  = 9.7 Hz, 1H), 6.30 (dd,  $J$  = 9.2, 4.3 Hz, 1H), 3.87 (s, 3H), 2.26 (s, 3H).

**<sup>13</sup>C NMR** (101 MHz, CDCl<sub>3</sub>):  $\delta$  165.3, 160.0, 158.9 (d,  $J$  = 245.4 Hz), 140.0 (d,  $J$  = 3.0 Hz), 137.0, 136.9, 133.2, 129.9, 128.7, 128.1, 127.6, 122.8, 120.8 (d,  $J$  = 9.1 Hz), 119.6 (d,  $J$  = 24.2 Hz), 114.8 (d,  $J$  = 8.1 Hz), 114.1 (d,  $J$  = 23.2 Hz), 112.5, 109.0, 51.4, 10.4.

**<sup>19</sup>F NMR** (376 MHz, CDCl<sub>3</sub>):  $\delta$  -118.26.

**HRMS (ESI) m/z:** [C<sub>22</sub>H<sub>17</sub>FN<sub>2</sub>O<sub>3</sub>+H]<sup>+</sup> calcd.: 377.1296; found:377.1286.

**Optical Rotation:**  $[\alpha]_D^{28}$  = +6.0 ( $c$  = 1.0, CHCl<sub>3</sub>) [94% *ee*].

**Chiral HPLC:** 90% *ee* [Chiral MD(2), 250×4.6, *i*-PrOH/*n*-heptane=35/65, 0.8 mL/min, 254 nm,  $t_R$  = 15.03min (major), 26.99min (minor)].

**Methyl (S)-1-(6-chloro-2-oxoquinolin-1(2H)-yl)-2-methyl-5-phenyl-1H-pyrrole-3-carboxylate (3s):**

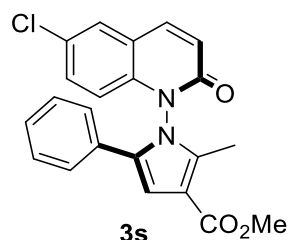

To a flame dried Schlenk tube were added **1s** (19.5 mg, 0.1 mmol), **C1** (5.5 mg, 0.01 mmol), MgSO<sub>4</sub> (100 mg), anhydrous CCl<sub>4</sub> (1.0 mL) and **2a** (28.0 mg, 0.12 mmol). The resulting reaction mixture was stirred at 25 °C for 23 d. Then the solution was concentrated under vacuum and the mixture was purified through column chromatography (PE/EA = 5/1) to afford the product **3s** in 92% yield (36.2 mg) as a white solid.

**M.p.:** 76-78 °C.

**IR** (film)  $\nu_{\text{max}}/\text{cm}^{-1}$ : 3062, 2947, 1683, 1558, 1428, 1242, 1210, 1071, 811, 758, 697.

**<sup>1</sup>H NMR (400 MHz, CDCl<sub>3</sub>):**  $\delta$  7.68 (d,  $J$  = 9.8 Hz, 1H), 7.53 (d,  $J$  = 2.3 Hz, 1H), 7.34 (dd,  $J$  = 8.9, 2.3 Hz, 1H), 7.23–7.14 (m, 5H), 6.88 (s, 1H), 6.80 (d,  $J$  = 9.7 Hz, 1H), 6.28 (d,  $J$  = 8.9 Hz, 1H), 3.87 (s, 3H), 2.26 (s, 3H).

**<sup>13</sup>C NMR (101 MHz, CDCl<sub>3</sub>):**  $\delta$  165.2, 159.8, 139.8, 139.1, 136.8, 133.1, 131.9, 129.9, 129.5, 128.7, 128.1, 128.0, 127.6, 122.7, 121.0, 114.5, 112.5, 109.0, 51.4, 10.4.

**HRMS (ESI) m/z:** [C<sub>22</sub>H<sub>17</sub>ClN<sub>2</sub>O<sub>3</sub>+H]<sup>+</sup> calcd.: 393.1001; found: 393.0994.

**Optical Rotation:**  $[\alpha]_D^{28} = +3.0$  ( $c = 1.0$ , CHCl<sub>3</sub>) [94% *ee*].

**Chiral HPLC:** 88% *ee* [Chiral MD(2), 250×4.6, *i*-PrOH/*n*-heptane = 25/75, 0.8 mL/min, 254 nm,  $t_R = 11.63$ min (major), 18.48min (minor)].

**Methyl (S)-1-(6-bromo-2-oxoquinolin-1(2H)-yl)-2-methyl-5-phenyl-1H-pyrrole-3-carboxylate (3t):**

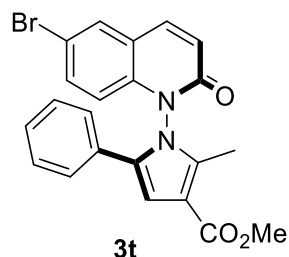

To a flame dried Schlenk tube were added **1t** (23.9 mg, 0.1 mmol), **C1** (5.5 mg, 0.01 mmol), MgSO<sub>4</sub> (100 mg), anhydrous CCl<sub>4</sub> (1.0 mL) and **2a** (28.0 mg, 0.12 mmol). The resulting reaction mixture was stirred at 25 °C for 13 d. Then the solution was concentrated under vacuum and the mixture was purified through column chromatography (PE/EA = 5/1) to afford the product **3t** in 97% yield (42.4 mg) as a white solid.

**M.p.:** 151-153 °C.

**IR** (film)  $\nu_{\text{max}}/\text{cm}^{-1}$ : 3113, 2944, 1706, 1682, 1585, 1425, 1245, 1216, 1081, 929, 820, 778, 761, 696.

**<sup>1</sup>H NMR (400 MHz, CDCl<sub>3</sub>):**  $\delta$  7.69–7.65 (m, 2H), 7.47 (dd,  $J$  = 8.9, 2.1 Hz, 1H), 7.23–7.14 (m, 5H), 6.88 (s, 1H), 6.80 (d,  $J$  = 9.8 Hz, 1H), 6.22 (d,  $J$  = 8.9 Hz, 1H), 3.87 (s, 3H), 2.26 (s, 3H).

**<sup>13</sup>C NMR (101 MHz, CDCl<sub>3</sub>):**  $\delta$  165.3, 159.8, 139.7, 139.6, 136.8, 134.6, 133.2, 131.1, 129.9, 128.7, 128.1, 127.7, 122.7, 121.4, 116.9, 114.8, 112.5, 109.0, 51.4, 10.4.

**HRMS (ESI) m/z:** [C<sub>22</sub>H<sub>17</sub>BrN<sub>2</sub>O<sub>3</sub>+H]<sup>+</sup> calcd.: 437.0496; found: 437.0488.

**Optical Rotation:**  $[\alpha]_D^{28} = -1.1$  ( $c = 1.0$ , CHCl<sub>3</sub>) [84% *ee*].

**Chiral HPLC:** 84% *ee* [Chiral MD(2), 250×4.6, *i*-PrOH/*n*-heptane = 20/80, 0.8 mL/min, 254 nm,  $t_R = 15.47$ min (major), 26.67min (minor)].

**Methyl (S)-2-methyl-1-(4-methyl-2-oxoquinolin-1(2H)-yl)-5-phenyl-1H-pyrrole-3-carboxylate (3u):**

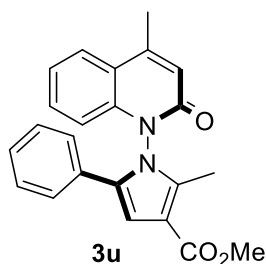

To a flame dried Schlenk tube were added **1u** (17.4 mg, 0.1 mmol), **C1** (5.5 mg, 0.01 mmol), MgSO<sub>4</sub> (100 mg), anhydrous CCl<sub>4</sub> (1.0 mL) and **2a** (28.0 mg, 0.12 mmol). The resulting reaction mixture was stirred at 25 °C for 9 d. Then the solution was concentrated under vacuum and the mixture was purified through column chromatography (PE/EA = 5/1) to afford the product **3u** in 86% yield (32.2 mg) as a white solid.

**M.p.:** 145-147 °C.

**IR** (film)  $\nu_{\text{max}}/\text{cm}^{-1}$ : 2923, 2854, 1704, 1683, 1539, 1437, 1246, 1203, 1070, 765, 750.

**<sup>1</sup>H NMR (400 MHz, CDCl<sub>3</sub>):**  $\delta$  7.66 (d,  $J$  = 8.0 Hz, 1H), 7.43–7.37 (m, 1H), 7.26–7.22 (m, 3H), 7.18–7.12 (m, 3H), 6.88 (s, 1H), 6.65 (s, 1H), 6.33 (d,  $J$  = 8.4 Hz, 1H), 3.87 (s, 3H), 2.50 (s, 3H), 2.24 (s, 3H).

**<sup>13</sup>C NMR (101 MHz, CDCl<sub>3</sub>):**  $\delta$  165.4, 160.1, 149.2, 140.1, 137.2, 133.3, 131.7, 130.2, 128.6, 127.8, 127.7, 125.6, 123.8, 120.8, 120.5, 113.2, 112.2, 108.8, 51.3, 19.5, 10.4.

**HRMS (ESI) m/z:** [C<sub>22</sub>H<sub>17</sub>BrN<sub>2</sub>O<sub>3</sub>+H]<sup>+</sup> calcd.: 373.1547; found: 373.1545.

**Optical Rotation:**  $[\alpha]_D^{28} = +2.8$  ( $c = 1.0$ , CHCl<sub>3</sub>) [84% *ee*].

**Chiral HPLC:** 84% *ee* [Chiral MD(2), 250×4.6, *i*-PrOH/*n*-heptane = 20/80, 0.8 mL/min, 254 nm,  $t_R = 13.31$ min (major), 22.43min (minor)].

**Methyl (S)-2-methyl-1-(2-oxo-4-phenylquinolin-1(2H)-yl)-5-phenyl-1H-pyrrole-3-carboxylate (3v):**

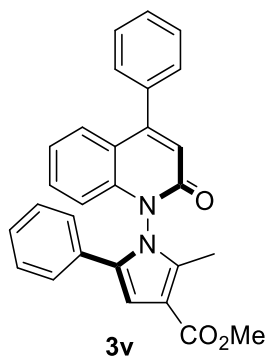

To a flame dried Schlenk tube were added **1v** (23.6 mg, 0.1 mmol), **C1** (5.5 mg, 0.01 mmol), MgSO<sub>4</sub> (100 mg), anhydrous CCl<sub>4</sub> (1.0 mL) and **2a** (28.0 mg, 0.12 mmol). The resulting reaction mixture was stirred at 25 °C for 23 d. Then the solution was concentrated under vacuum and the mixture was purified through column chromatography (PE/EA = 5/1) to afford the product **3v** in 97% yield (42.0 mg) as a white solid.

**M.p.:** 184-186 °C.

**IR** (film)  $\nu_{\max}/\text{cm}^{-1}$ : 2947, 1697, 1675, 1444, 1249, 1207, 1079, 866, 752, 698.

**$^1\text{H}$  NMR (400 MHz,  $\text{CDCl}_3$ )**:  $\delta$  7.55–7.49 (m, 4H), 7.46–7.39 (m, 3H), 7.31–7.27 (m, 2H), 7.22–7.13 (m, 4H), 6.92 (s, 1H), 6.73 (s, 1H), 6.40 (d,  $J = 8.4$  Hz, 1H), 3.89 (s, 3H), 2.33 (s, 3H).

**$^{13}\text{C}$  NMR (101 MHz,  $\text{CDCl}_3$ )**:  $\delta$  165.4, 160.0, 153.2, 140.7, 137.2, 136.3, 133.3, 131.9, 130.2, 129.4, 128.9, 128.9, 128.7, 128.0, 127.9, 127.8, 123.8, 120.7, 119.9, 113.3, 112.3, 109.0, 51.3, 10.6.

**HRMS (ESI)  $m/z$** :  $[\text{C}_{28}\text{H}_{22}\text{N}_2\text{O}_3+\text{H}]^+$  calcd.: 435.1703; found: 435.1691.

**Optical Rotation**:  $[\alpha]_D^{28} = +11.6$  ( $c = 1.0$ ,  $\text{CHCl}_3$ ) [84% *ee*].

**Chiral HPLC**: 86% *ee* [Chiral MD(2), 250 $\times$ 4.6, *i*-PrOH/*n*-heptane = 25/75, 0.8 mL/Fmin, 254 nm,  $t_R = 9.79$ min (major), 13.64min (minor)].

**Methyl (S)-1-(4-methoxy-3-methyl-2-oxoquinolin-1(2H)-yl)-2-methyl-5-phenyl-1H-pyrrole-3-carboxylate (3w):**

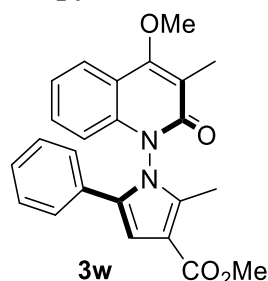

To a flame dried Schlenk tube were added **1w** (20.4 mg, 0.1 mmol), **C1** (5.5 mg, 0.01 mmol),  $\text{MgSO}_4$  (100 mg), anhydrous  $\text{CCl}_4$  (1.0 mL) and **2a** (28.0 mg, 0.12 mmol). The resulting reaction mixture was stirred at 25 °C for 7 d. Then the solution was concentrated under vacuum and the mixture was purified through column chromatography (PE/EA = 5/1) to afford the product **3w** in 97% yield (39.0 mg) as a white solid.

**M.p.**: 126-128 °C.

**IR** (film)  $\nu_{\max}/\text{cm}^{-1}$ : 2949, 2846, 1714, 1661, 1601, 1455, 1242, 1127, 1066, 768, 750.

**$^1\text{H}$  NMR (400 MHz,  $\text{CDCl}_3$ )**:  $\delta$  7.80 (d,  $J = 7.9$  Hz, 1H), 7.37 (t,  $J = 7.1$  Hz, 1H), 7.26–7.21 (m, 1H), 7.20–7.16 (m, 2H), 7.16–7.11 (m, 3H), 6.87 (s, 1H), 6.37 (d,  $J = 8.2$  Hz, 1H), 3.96 (s, 3H), 3.87 (s, 3H), 2.25 (s, 3H), 2.23 (s, 3H).

**$^{13}\text{C}$  NMR (101 MHz,  $\text{CDCl}_3$ )**:  $\delta$  165.5, 162.6, 161.8, 138.9, 137.3, 133.3, 131.2, 130.3, 128.6, 127.8, 127.6, 123.7, 123.6, 118.5, 117.3, 112.9, 112.1, 108.8, 61.5, 51.3, 10.8, 10.5.

**HRMS (ESI)  $m/z$** :  $[\text{C}_{22}\text{H}_{17}\text{BrN}_2\text{O}_3+\text{H}]^+$  calcd.: 403.1653; found: 403.1650.

**Optical Rotation**:  $[\alpha]_D^{28} = +3.0$  ( $c = 1.0$ ,  $\text{CHCl}_3$ ) [87% *ee*].

**Chiral HPLC**: 87% *ee* [Chiral MD(2), 250 $\times$ 4.6, *i*-PrOH/*n*-heptane = 20/80, 0.8 mL/min, 254 nm,  $t_R = 10.91$  min (major), 37.63 min (minor)].

**Methyl (S)-2-methyl-1-(3-methyl-2-oxoquinoxalin-1(2H)-yl)-5-phenyl-1H-pyrrole-3-carboxylate (5a):**

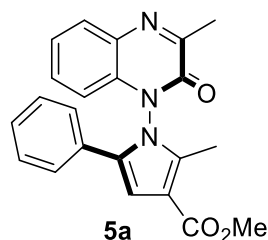

To a flame dried Schlenk tube were added **4a** (17.5 mg, 0.1 mmol), **C1** (5.5 mg, 0.01 mmol), MgSO<sub>4</sub> (100 mg), PhCOOH (2.4 mg, 0.02 mmol), anhydrous CCl<sub>4</sub> (1.0 mL) and **2a** (28.0 mg, 0.12 mmol). The resulting reaction mixture was stirred at 40 °C for 9 d. Then the solution was concentrated under vacuum and the mixture was purified through column chromatography (PE/EA = 8/1) to afford the product **5a** in 80% yield (29.8 mg) as a white solid.

**M.p.:** 131-133 °C.

**IR** (film)  $\nu_{\max}/\text{cm}^{-1}$ : 3084, 2945, 1705, 1677, 1603, 1438, 1243, 1212, 1141, 1069, 775, 762, 695.

**<sup>1</sup>H NMR** (400 MHz, CDCl<sub>3</sub>):  $\delta$  7.79 (d,  $J$  = 7.9 Hz, 1H), 7.42–7.36 (m, 1H), 7.35–7.30 (m, 1H), 7.15 (s, 5H), 6.87 (s, 1H), 6.42 (d,  $J$  = 8.2 Hz, 1H), 3.87 (s, 3H), 2.62 (s, 3H), 2.26 (s, 3H).

**<sup>13</sup>C NMR** (101 MHz, CDCl<sub>3</sub>):  $\delta$  165.2, 159.1, 153.2, 136.7, 133.7, 133.3, 132.1, 130.8, 129.8, 129.5, 128.7, 128.2, 127.7, 125.3, 112.7, 112.5, 109.1, 51.4, 21.6, 10.5.

**HRMS (ESI) m/z**: [C<sub>22</sub>H<sub>17</sub>BrN<sub>2</sub>O<sub>3</sub>+H]<sup>+</sup> calcd.: 374.1499; found: 374.1491.

**Optical Rotation**:  $[\alpha]_D^{28} = +6.7$  ( $c$  = 1.0, CHCl<sub>3</sub>) [90% *ee*].

**Chiral HPLC**: 90% *ee* [Chiral MD(2), 250×4.6, *i*-PrOH/*n*-heptane = 20/80, 0.8 mL/min, 254 nm,  $t_R$  = 8.66 min (major), 16.16 min (minor)].

**Methyl (S)-2-methyl-1-(3-methyl-2-oxoquinoxalin-1(2H)-yl)-5-(p-tolyl)-1H-pyrrole-3-carboxylate (5b):**

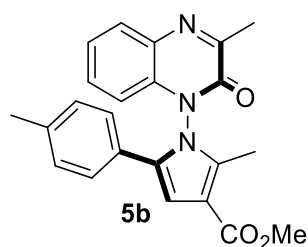

To a flame dried Schlenk tube were added **4a** (17.5 mg, 0.1 mmol), **C1** (5.5 mg, 0.01 mmol), MgSO<sub>4</sub> (100 mg), PhCOOH (2.4 mg, 0.02 mmol), anhydrous CCl<sub>4</sub> (1.0 mL) and **2b** (29.8 mg, 0.12 mmol). The resulting reaction mixture was stirred at 40 °C for 10 d. Then the solution was concentrated under vacuum and the mixture was purified through column chromatography (PE/EA = 8/1) to afford the product **5b** in 82% yield (31.6 mg) as a white solid.

**M.p.:** 121-123 °C.

**IR** (film)  $\nu_{\max}/\text{cm}^{-1}$ : 2945, 1714, 1673, 1604, 1437, 1238, 1212, 1144, 1070, 771, 758.

**<sup>1</sup>H NMR** (400 MHz, CDCl<sub>3</sub>):  $\delta$  7.79 (d,  $J$  = 7.9 Hz, 1H), 7.38 (t,  $J$  = 7.8 Hz, 1H), 7.32

(t,  $J = 7.6$  Hz, 1H), 7.04 (d,  $J = 8.1$  Hz, 2H), 6.96 (d,  $J = 8.5$  Hz, 2H), 6.83 (s, 1H), 6.40 (d,  $J = 9.5$  Hz, 1H), 3.87 (s, 3H), 2.63 (s, 3H), 2.25 (s, 3H), 2.21 (s, 3H).

$^{13}\text{C}$  NMR (101 MHz,  $\text{CDCl}_3$ ):  $\delta$  165.3, 159.1, 153.2, 138.1, 136.4, 133.7, 133.4, 132.1, 130.7, 129.5, 127.6, 126.9, 125.3, 112.6, 108.8, 51.4, 21.6, 21.2, 10.5.

HRMS (ESI)  $m/z$ :  $[\text{C}_{14}\text{H}_{12}\text{NO}_2+\text{H}]^+$  calcd.: 388.1656; found: 388.1651.

Optical Rotation:  $[\alpha]_D^{28} = +5.0$  ( $c = 1.0$ ,  $\text{CHCl}_3$ ) [94% *ee*].

Chiral HPLC: 86% *ee* [Chiral MD(2), 250 $\times$ 4.6, *i*-PrOH/*n*-heptane = 20/80, 0.8 mL/min, 254 nm,  $t_R = 6.95$  min (major), 16.48 min (minor)].

**Methyl (S)-5-(4-fluorophenyl)-2-methyl-1-(3-methyl-2-oxoquinoxalin-1(2H)-yl)-1H-pyrrole-3-carboxylate (5c):**

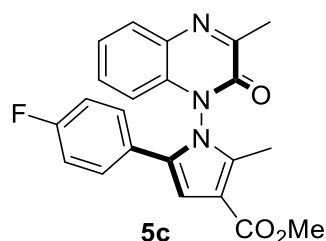

To a flame dried Schlenk tube were added **4a** (17.5 mg, 0.1 mmol), **C1** (5.5 mg, 0.01 mmol),  $\text{MgSO}_4$  (100 mg),  $\text{PhCOOH}$  (2.4 mg, 0.02 mmol), anhydrous  $\text{CCl}_4$  (1.0 mL) and **2c** (30.2 mg, 0.12 mmol). The resulting reaction mixture was stirred at 40°C for 10 d. Then the solution was concentrated under vacuum and the mixture was purified through column chromatography (PE/EA = 8/1) to afford the product **5c** in 81% yield (31.7 mg) as a white solid.

M.p.: 152-154 °C.

IR (film)  $\nu_{\text{max}}/\text{cm}^{-1}$ : 2924, 1709, 1690, 1608, 1582, 1441, 1239, 1222, 1139, 1065, 840, 775, 756.

$^1\text{H}$  NMR (400 MHz,  $\text{CDCl}_3$ ):  $\delta$  7.80 (dd,  $J = 7.8, 1.6$  Hz, 1H), 7.39 (t,  $J = 7.8$  Hz, 1H), 7.34 (t,  $J = 7.6$  Hz, 1H), 7.15–7.09 (m, 2H), 6.89–6.81 (m, 3H), 6.39 (dd,  $J = 8.1, 1.4$  Hz, 1H), 3.87 (s, 3H), 2.62 (s, 3H), 2.25 (s, 3H).

$^{13}\text{C}$  NMR (101 MHz,  $\text{CDCl}_3$ ):  $\delta$  165.1, 162.6 (d,  $J = 252.5$  Hz), 159.0, 153.1, 136.6, 133.6, 132.2 (d,  $J = 10.1$  Hz), 130.8, 129.8 (d,  $J = 8.1$  Hz), 129.6, 125.9 (d,  $J = 3.0$  Hz), 125.4, 115.9, 115.7, 112.7, 112.4, 109.2, 51.4, 21.6, 10.5.

$^{19}\text{F}$  NMR (376 MHz,  $\text{CDCl}_3$ ):  $\delta$  -112.8.

HRMS (ESI)  $m/z$ :  $[\text{C}_{14}\text{H}_{12}\text{NO}_2+\text{H}]^+$  calcd.: 392.1405; found: 392.1399.

Optical Rotation:  $[\alpha]_D^{28} = +3.0$  ( $c = 1.0$ ,  $\text{CHCl}_3$ ) [94% *ee*].

Chiral HPLC: 94% *ee* [Chiral MD(2), 250 $\times$ 4.6, *i*-PrOH/*n*-heptane = 20/80, 0.8 mL/min, 254 nm,  $t_R = 7.12$  min (major), 15.64 min (minor)].

**Methyl (S)-5-(3-methoxyphenyl)-2-methyl-1-(3-methyl-2-oxoquinoxalin-1(2H)-yl)-1H-pyrrole-3-carboxylate (5d):**

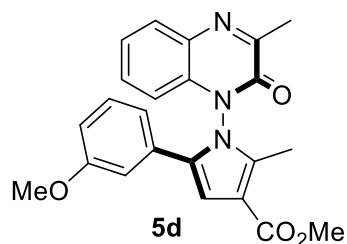

To a flame dried Schlenk tube were added **4a** (17.5 mg, 0.1 mmol), **C1** (5.5 mg, 0.01 mmol),  $\text{MgSO}_4$  (100 mg),  $\text{PhCOOH}$  (2.4 mg, 0.02 mmol), anhydrous  $\text{CCl}_4$  (1.0 mL) and **2d** (31.7 mg, 0.12 mmol). The resulting reaction mixture was stirred at 40 °C for 12 d. Then the solution was concentrated under vacuum and the mixture was purified through column chromatography (PE/EA = 10/1) to afford the product **5d** in 96% yield (38.7 mg) as a white solid.

**M.p.:** 88-90 °C.

**IR** (film)  $\nu_{\text{max}}/\text{cm}^{-1}$ : 2950, 2835, 1715, 1683, 1606, 1540, 1456, 1261, 1221, 1145, 1077, 800, 774, 753.

**$^1\text{H}$  NMR (400 MHz,  $\text{CDCl}_3$ ):**  $\delta$  7.81 (d,  $J = 7.7$  Hz, 1H), 7.40 (t,  $J = 7.7$  Hz, 1H), 7.34 (t,  $J = 7.6$  Hz, 1H), 7.07 (t,  $J = 7.8$  Hz, 1H), 6.88 (d,  $J = 0.9$  Hz, 1H), 6.77 – 6.67 (m, 3H), 6.44 (d,  $J = 8.2$  Hz, 1H), 3.88 (s, 3H), 3.56 (s, 3H), 2.62 (s, 3H), 2.26 (s, 3H).

**$^{13}\text{C}$  NMR (101 MHz,  $\text{CDCl}_3$ ):**  $\delta$  165.2, 159.6, 159.1, 153.2, 136.8, 133.8, 133.2, 132.2, 131.0, 130.8, 129.9, 129.6, 125.3, 112.0, 114.6, 112.7, 112.6, 112.3, 109.3, 55.1, 51.4, 21.6, 10.5.

**HRMS (ESI) m/z:** [ $\text{C}_{14}\text{H}_{12}\text{NO}_2 + \text{H}$ ] $^+$  calcd.: 404.1605; found: 404.1598.

**Optical Rotation:**  $[\alpha]_D^{28} = +5.7$  ( $c = 1.0$ ,  $\text{CHCl}_3$ ) [88% *ee*].

**Chiral HPLC:** 88% *ee* [Chiral MD(2), 250×4.6, *i*-PrOH/*n*-heptane = 25/75, 0.8 mL/min, 254 nm,  $t_R = 8.31$  min (major), 15.02 min (minor)].

**Methyl (S)-5-(3-fluorophenyl)-2-methyl-1-(3-methyl-2-oxoquinoxalin-1(2H)-yl)-1H-pyrrole-3-carboxylate (5e):**

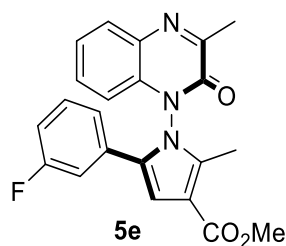

To a flame dried Schlenk tube were added **4a** (17.5 mg, 0.1 mmol), **C1** (5.5 mg, 0.01 mmol),  $\text{MgSO}_4$  (100 mg),  $\text{PhCOOH}$  (2.4 mg, 0.02 mmol), anhydrous  $\text{CCl}_4$  (1.0 mL) and **2e** (30.3 mg, 0.12 mmol). The resulting reaction mixture was stirred at 40 °C for 12 d. Then the solution was concentrated under vacuum and the mixture was purified through column chromatography (PE/EA = 10/1) to afford the product **5e** in 97% yield (38.1 mg) as a white solid.

**M.p.:** 143-145 °C.

**IR** (film)  $\nu_{\text{max}}/\text{cm}^{-1}$ : 3062, 2946, 1713, 1681, 1607, 1539, 1439, 1257, 1213, 1142, 1075,

864, 773, 758

**<sup>1</sup>H NMR (400 MHz, CDCl<sub>3</sub>):** δ 7.82 (d, *J* = 9.3 Hz, 1H), 7.40 (t, *J* = 8.6 Hz, 1H), 7.35 (t, *J* = 7.5 Hz, 1H), 7.12 (q, *J* = 7.2 Hz, 1H), 6.93–6.82 (m, 4H), 6.39 (d, *J* = 8.0 Hz, 1H), 3.87 (s, 3H), 2.64 (s, 3H), 2.25 (s, 3H).

**<sup>13</sup>C NMR (101 MHz, CDCl<sub>3</sub>):** δ 165.0, 162.7(d, *J* = 247.4 Hz), 159.1, 153.1, 137.2, 133.6, 132.2, 131.9(d, *J* = 3.0 Hz), 131.7(d, *J* = 9.09 Hz), 130.9, 130.4(d, *J* = 8.08 Hz), 129.7, 125.5, 123.0(d, *J* = 2.0 Hz), 115.2(d, *J* = 20.2 Hz), 114.6(d, *J* = 23.23 Hz), 112.9, 112.3, 109.8, 51.5, 21.6, 10.5.

**<sup>19</sup>F NMR (376 MHz, CDCl<sub>3</sub>):** δ -111.92.

**HRMS (ESI) m/z:** [C<sub>14</sub>H<sub>12</sub>NO<sub>2</sub>+H]<sup>+</sup> calcd.: 393.1405; found: 393.1400.

**Optical Rotation:** [α]<sub>D</sub><sup>28</sup> = +3.6 (*c* = 1.0, CHCl<sub>3</sub>) [94% *ee*].

**Chiral HPLC:** 94% *ee* [Chiral MD(2), 250×4.6, *i*-PrOH/*n*-heptane = 25/75, 0.8 mL/Fmin, 254 nm, t<sub>R</sub> = 6.90 min (major), 12.37 min (minor)].

**Methyl (S)-5-(3-chlorophenyl)-2-methyl-1-(3-methyl-2-oxoquinoxalin-1(2H)-yl)-1H-pyrrole-3-carboxylate (5f):**

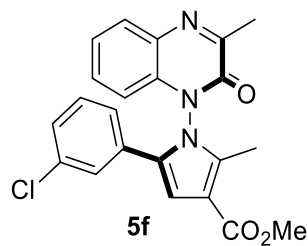

To a flame dried Schlenk tube were added **4a** (17.5 mg, 0.1 mmol), **C1** (5.5 mg, 0.01 mmol), MgSO<sub>4</sub> (100 mg), PhCOOH (2.4 mg, 0.02 mmol), anhydrous CCl<sub>4</sub> (1.0 mL) and **2f** (32.2 mg, 0.12 mmol). The resulting reaction mixture was stirred at 40 °C for 12 d. Then the solution was concentrated under vacuum and the mixture was purified through column chromatography (PE/EA = 8/1) to afford the product **5f** in 70% yield (28.6 mg) as a white solid.

**M.p.:** 105-107 °C.

**IR (film) v<sub>max</sub>/cm<sup>-1</sup>:** 3065, 2945, 1711, 1674, 1604, 1569, 1438, 1238, 1211, 1144, 1070, 772, 756, 690.

**<sup>1</sup>H NMR (400 MHz, CDCl<sub>3</sub>):** δ 7.82 (d, *J* = 7.9 Hz, 1H), 7.41 (t, *J* = 7.7 Hz, 1H), 7.35 (t, *J* = 7.5 Hz, 1H), 7.20 (s, 1H), 7.13 (d, *J* = 8.0 Hz, 1H), 7.07 (t, *J* = 7.8 Hz, 1H), 6.98 (d, *J* = 7.2 Hz, 1H), 6.90 (s, 1H), 6.37 (d, *J* = 8.0 Hz, 1H), 3.88 (s, 3H), 2.64 (s, 3H), 2.26 (s, 3H).

**<sup>13</sup>C NMR (101 MHz, CDCl<sub>3</sub>):** δ 165.0, 159.1, 153.2, 137.3, 134.6, 133.6, 132.2, 131.8, 131.4, 130.9, 130.1, 129.7, 128.3, 127.8, 125.5, 125.3, 112.9, 112.3, 109.9, 51.5, 21.6, 10.5.

**HRMS (ESI) m/z:** [C<sub>14</sub>H<sub>12</sub>NO<sub>2</sub>+H]<sup>+</sup> calcd.: 408.1110; found: 408.1103.

**Optical Rotation:** [α]<sub>D</sub><sup>28</sup> = +7.7 (*c* = 1.0, CHCl<sub>3</sub>) [94% *ee*].

**Chiral HPLC:** 94% *ee* [Chiral MD(2), 250×4.6, *i*-PrOH/*n*-heptane = 25/75, 0.8 mL/Fmin, 254 nm, t<sub>R</sub> = 7.04 min (major), 12.48 min (minor)].



**Methyl (S)-2-methyl-1-(3-methyl-2-oxoquinoxalin-1(2H)-yl)-5-(thiophen-2-yl)-1H-pyrrole-3-carboxylate (5g):**

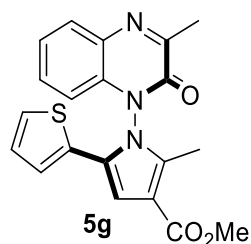

To a flame dried Schlenk tube were added **4a** (17.5 mg, 0.1 mmol), **C1** (5.5 mg, 0.01 mmol), MgSO<sub>4</sub> (100 mg), PhCOOH (2.4 mg, 0.02 mmol), anhydrous CCl<sub>4</sub> (1.0 mL) and **2g** (28.8 mg, 0.12 mmol). The resulting reaction mixture was stirred at 40 °C for 20 d. Then the solution was concentrated under vacuum and the mixture was purified through column chromatography (PE/EA = 8/1) to afford the product **5g** in 98% yield (37.0 mg) as a white solid.

**M.p.:** 139-141 °C.

**IR** (film)  $\nu_{\max}/\text{cm}^{-1}$ : 3127, 2939, 1708, 1688, 1602, 1437, 1244, 1224, 1146, 1076, 773, 750, 716.

**<sup>1</sup>H NMR (400 MHz, CDCl<sub>3</sub>):**  $\delta$  7.87 (d,  $J$  = 7.6 Hz, 1H), 7.43–7.34 (m, 2H), 7.05 (d,  $J$  = 5.0 Hz, 1H), 6.98 (s, 1H), 6.83–6.80 (m, 1H), 6.77 (d,  $J$  = 3.7 Hz, 1H), 6.49 (d,  $J$  = 9.6 Hz, 1H), 3.87 (s, 3H), 2.65 (s, 3H), 2.27 (s, 3H).

**<sup>13</sup>C NMR (101 MHz, CDCl<sub>3</sub>):**  $\delta$  165.0, 159.2, 153.0, 136.7, 133.6, 132.3, 130.8, 130.4, 129.6, 127.5, 126.0, 125.4, 125.4, 125.1, 112.7, 112.4, 109.4, 51.4, 21.6, 10.5.

**HRMS (ESI) m/z:** [C<sub>14</sub>H<sub>12</sub>NO<sub>2</sub>+H]<sup>+</sup> calcd.: 380.1064; found: 380.1056.

**Optical Rotation:**  $[\alpha]_D^{28} = +11.3$  ( $c$  = 1.0, CHCl<sub>3</sub>) [90% *ee*].

**Chiral HPLC:** 90% *ee* [Chiral MD(2), 250×4.6, *i*-PrOH/*n*-heptane = 25/75, 0.8 mL/Fmin, 254 nm,  $t_R$  = 8.98min (major), 24.08min (minor)].

**Isopropyl (S)-2-methyl-1-(3-methyl-2-oxoquinoxalin-1(2H)-yl)-5-phenyl-1H-pyrrole-3-carboxylate (5h):**

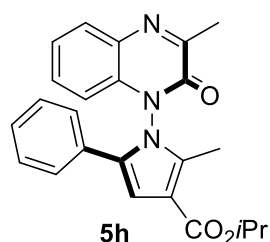

To a flame dried Schlenk tube were added **4a** (17.5 mg, 0.1 mmol), **C1** (5.5 mg, 0.01 mmol), MgSO<sub>4</sub> (100 mg), PhCOOH (2.4 mg, 0.02 mmol), anhydrous CCl<sub>4</sub> (1.0 mL) and **2h** (28.1 mg, 0.12 mmol). The resulting reaction mixture was stirred at 40 °C for 12 d. Then the solution was concentrated under vacuum and the mixture was purified through column chromatography (PE/EA = 8/1) to afford the pure product **5h** in 81% yield (32.5mg) as a white solid.

**M.p.:** 144-146 °C.

**IR** (film)  $\nu_{\max}/\text{cm}^{-1}$ : 2976, 2929, 1704, 1681, 1604, 1538, 1414, 1372, 1242, 1143, 1059, 777, 755, 699

**$^1\text{H}$  NMR (400 MHz,  $\text{CDCl}_3$ )**:  $\delta$  7.79 (d,  $J = 7.8$  Hz, 1H), 7.39 (t,  $J = 7.8$  Hz, 1H), 7.33 (t,  $J = 7.5$  Hz, 1H), 7.16 (s, 5H), 6.88 (s, 1H), 6.45 (d,  $J = 8.1$  Hz, 1H), 5.24 (hept,  $J = 6.2$  Hz, 1H), 2.63 (s, 3H), 2.25 (s, 3H), 1.37 (d,  $J = 4.0$  Hz, 6H).

**$^{13}\text{C}$  NMR (101 MHz,  $\text{CDCl}_3$ )**:  $\delta$  164.4, 159.1, 153.2, 136.3, 133.7, 133.1, 132.2, 130.8, 129.9, 129.5, 128.7, 128.2, 127.6, 125.3, 113.4, 112.6, 109.3, 67.4, 22.2, 21.6, 10.5.

**HRMS (ESI)  $m/z$** :  $[\text{C}_{14}\text{H}_{12}\text{NO}_2+\text{H}]^+$  calcd.: 402.1812; found: 402.1809.

**Optical Rotation**:  $[\alpha]_D^{28} = +8.9$  ( $c = 1.0$ ,  $\text{CHCl}_3$ ) [92% *ee*].

**Chiral HPLC**: 92% *ee* [Chiral MD(2), 250 $\times$ 4.6, *i*-PrOH/*n*-heptane = 20/80, 0.8 mL/Fmin, 254 nm,  $t_R = 10.96$ min (major), 30.92min (minor)].

**Methyl (S)-2-methyl-5-phenyl-1-(3,6,7-trimethyl-2-oxoquinoxalin-1(2H)-yl)-1H-pyrrole-3-carboxylate (5i):**

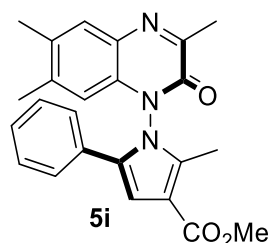

To a flame dried Schlenk tube were added **4i** (20.3 mg, 0.1 mmol), **C1** (5.5 mg, 0.01 mmol),  $\text{MgSO}_4$  (100 mg),  $\text{PhCOOH}$  (2.4 mg, 0.02 mmol), anhydrous  $\text{CCl}_4$  (1.0 mL) and **2a** (28.0 mg, 0.12 mmol). The resulting reaction mixture was stirred at 40 °C for 20 d. Then the solution was concentrated under vacuum and the mixture was purified through column chromatography (PE/EA = 8/1) to afford the product **5i** in 95% yield (38.2 mg) as a white solid.

**M.p.**: 100-102 °C.

**IR** (film)  $\nu_{\max}/\text{cm}^{-1}$ : 2947, 2921, 1715, 1683, 1622, 1558, 1440, 1410, 1237, 1206, 1156, 1069, 756, 702.

**$^1\text{H}$  NMR (400 MHz,  $\text{CDCl}_3$ )**:  $\delta$  7.54 (s, 1H), 7.15 (m, 5H), 6.88 (s, 1H), 6.21 (s, 1H), 3.88 (s, 3H), 2.58 (s, 3H), 2.29 (s, 3H), 2.25 (s, 6H).

**$^{13}\text{C}$  NMR (101 MHz,  $\text{CDCl}_3$ )**:  $\delta$  165.3, 157.6, 153.2, 140.9, 136.7, 134.3, 133.1, 131.7, 130.6, 129.9, 129.7, 128.7, 128.1, 127.5, 112.8, 112.5, 109.0, 51.4, 21.5, 20.5, 19.4, 10.5.

**HRMS (ESI)  $m/z$** :  $[\text{C}_{14}\text{H}_{12}\text{NO}_2+\text{H}]^+$  calcd.: 402.1812; found: 402.1807.

**Optical Rotation**:  $[\alpha]_D^{28} = +1.6$  ( $c = 1.0$ ,  $\text{CHCl}_3$ ) [93% *ee*].

**Chiral HPLC**: 93% *ee* [Chiral MD(2), 250 $\times$ 4.6, *i*-PrOH/*n*-heptane = 25/75, 0.8 mL/Fmin, 254 nm,  $t_R = 7.31$ min (major), 14.35min (minor)].

**Methyl (S)-1-(6,7-difluoro-3-methyl-2-oxoquinoxalin-1(2H)-yl)-2-methyl-5-phenyl-1H-pyrrole-3-carboxylate (5j):**

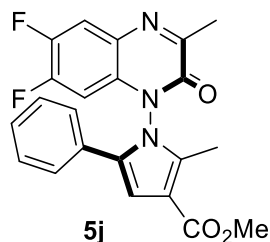

To a flame dried Schlenk tube were added **4j** (21.0 mg, 0.1 mmol), **C1** (5.5 mg, 0.01 mmol), MgSO<sub>4</sub> (100 mg), PhCOOH (12.2 mg, 0.1 mmol), anhydrous CCl<sub>4</sub> (1.0 mL) and **2a** (28.0 mg, 0.12 mmol). The resulting reaction mixture was stirred at 40 °C for 14 d. Then the solution was concentrated under vacuum and the mixture was purified through column chromatography (PE/EA = 8/1) to afford the product **5j** in 47% yield (19.0 mg) as a white solid.

**M.p.:** 93-95 °C.

**IR** (film)  $\nu_{\max}/\text{cm}^{-1}$ : 3135, 3069, 2948, 1708, 1697, 1593, 1501, 1437, 1243, 1197, 1158, 1085, 835, 801, 758, 686.

**<sup>1</sup>H NMR (400 MHz, CDCl<sub>3</sub>):**  $\delta$  7.58 (dd,  $J = 9.9, 7.7$  Hz, 1H), 7.22–7.12 (m, 5H), 6.87 (s, 1H), 6.17 (dd,  $J = 10.3, 7.0$  Hz, 1H), 3.88 (s, 3H), 2.61 (s, 3H), 2.27 (s, 3H).

**<sup>13</sup>C NMR (101 MHz, CDCl<sub>3</sub>):**  $\delta$  164.98, 159.77, 159.73, 153.1 (d,  $J = 14.1$  Hz), 152.79, 150.5 (d,  $J = 14.1$  Hz), 148.9 (d,  $J = 14.1$  Hz), 146.4 (d,  $J = 14.1$  Hz), 136.30, 133.06, 130.8 (d,  $J = 8.1$  Hz), 129.43, 128.90, 128.50, 127.67, 117.6 (d,  $J = 18.2$  Hz), 113.13, 109.48, 101.4 (d,  $J = 23.2$  Hz), 51.47, 21.57, 10.49.

**<sup>19</sup>F NMR (376 MHz, CDCl<sub>3</sub>):**  $\delta$  -129.42, -139.25.

**HRMS (ESI) m/z:** [C<sub>14</sub>H<sub>12</sub>NO<sub>2</sub>+H]<sup>+</sup> calcd.: 410.1311; found: 410.1306.

**Optical Rotation:**  $[\alpha]_D^{28} = +7.1$  ( $c = 1.0$ , CHCl<sub>3</sub>) [92% *ee*].

**Chiral HPLC:** 92% *ee* [Chiral MD(2), 250×4.6, *i*-PrOH/*n*-heptane = 20/80, 0.8 mL/min, 254 nm,  $t_R = 6.64$ min (major), 9.60min (minor)].

**Methyl (S)-1-(6,7-dichloro-3-methyl-2-oxoquinoxalin-1(2H)-yl)-2-methyl-5-phenyl-1H-pyrrole-3-carboxylate (5k):**

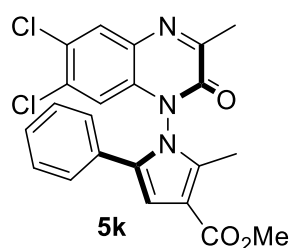

To a flame dried Schlenk tube were added **4k** (24.4 mg, 0.1 mmol), **C1** (5.5 mg, 0.01 mmol), MgSO<sub>4</sub> (100 mg), PhCOOH (2.4 mg, 0.02 mmol), anhydrous CCl<sub>4</sub> (1.0 mL) and **2a** (28.0 mg, 0.12 mmol). The resulting reaction mixture was stirred at 40 °C for 15 d. Then the solution was concentrated under vacuum and the mixture was purified through column chromatography (PE/EA = 10/1) to afford the product **5k** in 54% yield (26.6 mg) as a white solid.

**M.p.:** 58-60 °C.

**IR** (film)  $\nu_{\max}/\text{cm}^{-1}$ : 2923, 2853, 1716, 1698, 1652, 1558, 1456, 1240, 1144, 1070, 756, 697.

**$^1\text{H}$  NMR (400 MHz,  $\text{CDCl}_3$ )**:  $\delta$  7.86 (s, 1H), 7.21–7.18 (m, 3H), 7.15–7.11 (m, 2H), 6.88 (s, 1H), 6.49 (s, 1H), 3.88 (s, 3H), 2.61 (s, 3H), 2.27 (s, 3H).

**$^{13}\text{C}$  NMR (101 MHz,  $\text{CDCl}_3$ )**:  $\delta$  165.0, 160.6, 152.5, 136.2, 135.1, 133.1, 133.0, 131.1, 130.7, 129.4, 129.3, 128.9, 128.5, 127.7, 113.9, 113.1, 109.5, 51.5, 21.7, 10.5.

**HRMS (ESI) m/z**:  $[\text{C}_{14}\text{H}_{12}\text{NO}_2+\text{H}]^+$  calcd.: 442.0720; found: 442.0715.

**Optical Rotation**:  $[\alpha]_D^{28} = -1.1$  ( $c = 1.0$ ,  $\text{CHCl}_3$ ) [98% *ee*].

**Chiral HPLC**: 98% *ee* [Chiral MD(2), 250 $\times$ 4.6, *i*-PrOH/*n*-heptane = 20/80, 0.8 mL/Fmin, 254 nm,  $t_R = 6.77$ min (minor), 10.08 min (major)].

**Methyl (*S*)-1-(3-(but-3-en-1-yl)-2-oxoquinoxalin-1(2*H*)-yl)-2-methyl-5-phenyl-1*H*-pyrrole-3-carboxylate (**5l**):**

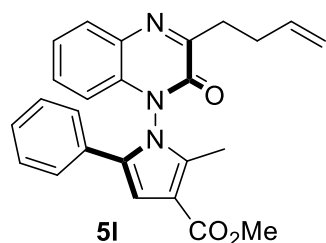

To a flame dried Schlenk tube were added **4l** (21.5 mg, 0.1 mmol), **C1** (5.5 mg, 0.01 mmol),  $\text{MgSO}_4$  (100 mg),  $\text{PhCOOH}$  (2.4 mg, 0.02 mmol), anhydrous  $\text{CCl}_4$  (1.0 mL) and **2a** (28.0 mg, 0.12 mmol). The resulting reaction mixture was stirred at 40 °C for 9 d. Then the solution was concentrated under vacuum and the mixture was purified through column chromatography (PE/EA = 10/1) to afford the product **5l** in 65% yield (26.9 mg) as a white solid.

**M.p.**: 108-110 °C.

**IR** (film)  $\nu_{\max}/\text{cm}^{-1}$ : 3071, 2950, 1705, 1677, 1605, 1583, 1438, 1407, 1238, 1208, 1084, 904, 779, 756, 694.

**$^1\text{H}$  NMR (400 MHz,  $\text{CDCl}_3$ )**:  $\delta$  7.82 (d,  $J = 7.8$  Hz, 1H), 7.39 (t,  $J = 7.7$  Hz, 1H), 7.33 (t,  $J = 7.6$  Hz, 1H), 7.15 (s, 5H), 6.87 (s, 1H), 6.43 (d,  $J = 8.2$  Hz, 1H), 5.88 (ddt,  $J = 16.9, 10.1, 6.6$  Hz, 1H), 5.03 (d,  $J = 17.1$  Hz, 1H), 4.96 (d,  $J = 10.2$  Hz, 1H), 3.88 (s, 3H), 3.16–3.00 (m, 2H), 2.61–2.49 (m, 2H), 2.25 (s, 3H).

**$^{13}\text{C}$  NMR (101 MHz,  $\text{CDCl}_3$ )**:  $\delta$  165.2, 161.2, 152.9, 137.2, 136.7, 133.5, 133.3, 132.2, 130.8, 129.80, 129.76, 128.7, 128.2, 127.7, 125.2, 115.7, 112.7, 112.5, 109.1, 51.4, 33.4, 30.7, 10.5.

**HRMS (ESI) m/z**:  $[\text{C}_{14}\text{H}_{12}\text{NO}_2+\text{H}]^+$  calcd.: 414.1812; found: 414.1804.

**Optical Rotation**:  $[\alpha]_D^{28} = +7.0$  ( $c = 1.0$ ,  $\text{CHCl}_3$ ) [88% *ee*].

**Chiral HPLC**: 88% *ee* [Chiral MD(2), 250 $\times$ 4.6, *i*-PrOH/*n*-heptane = 25/75, 0.8 mL/min, 254 nm,  $t_R = 7.03$ min (major), 9.25min (minor)].

**Methyl (*S*)-2-methyl-1-(2-oxo-3-(trifluoromethyl)quinoxalin-1(2*H*)-yl)-5-phenyl-1*H*-pyrrole-3-carboxylate (**5m**):**

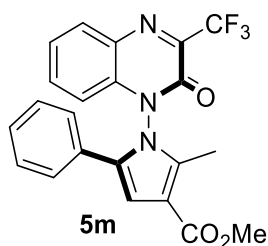

To a flame dried Schlenk tube were added **4m** (23.0 mg, 0.1 mmol), **C1** (5.5 mg, 0.01 mmol), MgSO<sub>4</sub> (100 mg), PhCOOH (2.4 mg, 0.02 mmol), anhydrous CCl<sub>4</sub> (1.0 mL) and **2a** (28.0 mg, 0.12 mmol). The resulting reaction mixture was stirred at 40 °C for 20 d. Then the solution was concentrated under vacuum and the mixture was purified through column chromatography (PE/EA = 8/1) to afford the product **5m** in 46% yield (20.0 mg) as a white solid.

**M.p.:** 117-119 °C.

**IR** (film)  $\nu_{\max}/\text{cm}^{-1}$ : 1709, 1697, 1607, 1568, 1439, 1354, 1224, 1148, 1078, 796, 758, 694.

**<sup>1</sup>H NMR** (400 MHz, CDCl<sub>3</sub>):  $\delta$  7.96 (d,  $J$  = 6.8 Hz, 1H), 7.58 (t,  $J$  = 7.3 Hz, 1H), 7.43 (t,  $J$  = 8.3 Hz, 1H), 7.20 – 7.14 (m, 5H), 6.87 (s, 1H), 6.43 (d,  $J$  = 7.2 Hz, 1H), 3.89 (s, 3H), 2.30 (s, 3H).

**<sup>13</sup>C NMR** (101 MHz, CDCl<sub>3</sub>):  $\delta$  164.8, 159.3, 154.1, 152.8, 146.0, 138.1, 133.1 (d,  $J$  = 111.1 Hz), 131.0, 129.8, 128.3, 125.5, 124.6, 123.2, 122.6, 120.9, 113.2, 112.4, 110.9, 110.4, 101.1, 51.5, 21.6, 10.3.

**<sup>19</sup>F NMR** (376 MHz, CDCl<sub>3</sub>):  $\delta$  -69.66.

**HRMS (ESI) m/z:** [C<sub>14</sub>H<sub>12</sub>NO<sub>2</sub>+H]<sup>+</sup> calcd.: 428.1217; found: 428.1211.

**Optical Rotation:**  $[\alpha]_D^{28}$  = +16.8 ( $c$  = 1.0, CHCl<sub>3</sub>) [87% *ee*].

**Chiral HPLC:** 87% *ee* [Chiral MD(2), 250×4.6, *i*-PrOH/*n*-heptane = 25/75, 0.8 mL/min, 254 nm,  $t_R$  = 7.31min (major), 8.25min (minor)].

#### (4) Synthesis and Characterization of Products 7, 9-15

**Methyl (S)-2-methyl-1-(2-oxo-3,4-dihydroquinolin-1(2H)-yl)-5-phenyl-1H-pyrrole-3-carboxylate (7):**

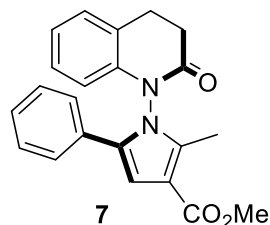

To a flame dried Schlenk tube were added **6** (16.2 mg, 0.1 mmol), **C1** (5.5 mg, 0.01 mmol), MgSO<sub>4</sub> (100 mg), PhCOOH (1.2 mg, 0.01 mmol), anhydrous CCl<sub>4</sub> (1.0 mL) and **2a** (28.0 mg, 0.12 mmol). The resulting reaction mixture was stirred at 25°C for 7 d. Then the solution was concentrated under vacuum. Finally, the mixture was purified through column chromatography (PE/EA = 5/1) to afford the pure product **7** in 97%

yield (35.0 mg) as a faint yellow solid.

**M.p.:** 53-55 °C.

**IR** (film)  $\nu_{\text{max}}/\text{cm}^{-1}$ : 3031, 2948, 1716, 1698, 1540, 1456, 1417, 1221, 1072, 755.

**<sup>1</sup>H NMR** (400 MHz, CDCl<sub>3</sub>):  $\delta$  7.25–7.18 (m, 5H), 7.17–7.09 (m, 2H), 7.02 (t,  $J = 7.4$  Hz, 1H), 6.81 (s, 1H), 6.15 (d,  $J = 8.1$  Hz, 1H), 3.86 (s, 3H), 3.02–2.74 (m, 4H), 2.36 (s, 3H).

**<sup>13</sup>C NMR** (101 MHz, CDCl<sub>3</sub>):  $\delta$  168.1, 165.5, 139.8, 137.2, 133.0, 130.5, 128.5, 128.3, 128.2, 127.9, 127.8, 124.5, 124.4, 113.7, 111.8, 108.6, 51.2, 31.8, 24.9, 10.5.

**HRMS (ESI) m/z:** [C<sub>14</sub>H<sub>12</sub>NO<sub>2</sub>+H]<sup>+</sup> calcd.: 361.1547; found: 361.1539.

**Optical Rotation:**  $[\alpha]_{\text{D}}^{28} = +1.5$  ( $c = 1.0$ , CHCl<sub>3</sub>) [85% *ee*].

**Chiral HPLC:** 85% *ee* [Chiral MD(2), 250×4.6, *i*-PrOH/*n*-heptane = 20/80, 0.8 mL/min, 254 nm,  $t_{\text{R}} = 9.90$ min (major), 14.83min (minor)].

**Methyl (S)-2-methyl-1-(2-oxo-6-phenyl-3,4-dihydropyridin-1(2H)-yl)-5-phenyl-1H-pyrrole-3-carboxylate (9):**

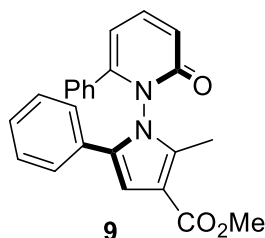

To a flame dried Schlenk tube were added **8** (18.6 mg, 0.1 mmol), **C1** (5.5 mg, 0.01 mmol), MgSO<sub>4</sub> (100 mg), PhCOOH (1.2 mg, 0.01 mmol), anhydrous CCl<sub>4</sub> (1.0 mL) and **2a** (28.0 mg, 0.12 mmol). The resulting reaction mixture was stirred at 25 °C for 14 d. Then the solution was concentrated under vacuum. Finally, the mixture was purified through column chromatography (PE/EA = 5/1) to afford the product **9** in 42% yield (16.3 mg) as a faint yellow solid.

**M.p.:** 153-155 °C.

**IR** (film)  $\nu_{\text{max}}/\text{cm}^{-1}$ : 3050, 2944, 1704, 1677, 1605, 1544, 1439, 1244, 1086, 798, 760, 698.

**<sup>1</sup>H NMR** (400 MHz, CDCl<sub>3</sub>):  $\delta$  7.46 (d,  $J = 9.4$  Hz, 1H), 7.30–7.25 (m, 2H), 7.23–7.17 (m, 3H), 7.12 (t,  $J = 7.8$  Hz, 2H), 6.92–6.86 (m, 2H), 6.80 (d,  $J = 9.4$  Hz, 1H), 6.62 (d,  $J = 7.3$  Hz, 2H), 6.48 (s, 1H), 6.08 (d,  $J = 6.9$  Hz, 1H), 3.80 (s, 3H), 2.51 (s, 3H).

**<sup>13</sup>C NMR** (101 MHz, CDCl<sub>3</sub>):  $\delta$  165.5, 161.6, 150.8, 140.6, 137.4, 132.0, 131.9, 130.4, 129.7, 128.6, 128.2, 128.0, 127.7, 127.6, 120.3, 111.5, 108.3, 108.1, 51.2, 11.3.

**HRMS (ESI) m/z:** [C<sub>14</sub>H<sub>12</sub>NO<sub>2</sub>+H]<sup>+</sup> calcd.: 385.1547; found: 385.1540.

**Optical Rotation:**  $[\alpha]_{\text{D}}^{28} = -3.0$  ( $c = 1.0$ , CHCl<sub>3</sub>) [50% *ee*].

**Chiral HPLC:** 50% *ee* [Chiral MD(2), 250×4.6, *i*-PrOH/*n*-heptane = 25/75, 0.8 mL/min, 254 nm,  $t_{\text{R}} = 12.29$ min (minor), 18.33min (major)].

**Methyl (S, E)-2-methyl-1-(2-oxo-6-styrylquinolin-1(2H)-yl)-5-phenyl-1H-pyrrole-3-carboxylate (10):**

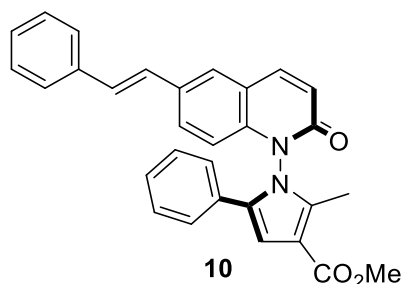

To an dry three-neck flask was added **3t** (50.0 mg, 0.11 mmol, 1.0 equiv., 90% ee), *E*-phenylethenylboronic acid (34.0 mg, 0.23 mmol, 2 equiv.), PdCl<sub>2</sub>(PPh<sub>3</sub>)<sub>2</sub> (0.4 mg, 0.00058 mmol, 0.5 mol%) and K<sub>2</sub>CO<sub>3</sub> (39.7 mg, 0.29 mmol, 2.5 equiv.). The vial was capped and purged with N<sub>2</sub> before the addition of 1,4-dioxane (0.8 mL)/H<sub>2</sub>O (0.2 mL). The reaction mixture was heated for 16 h at 89 °C. The reaction mixture was then allowed to cool to room temperature and The reaction was quenched by the addition of water and the mixture was extracted with EtOAc. The organic phase was separated, washed with water and brine, dried over anhydrous Na<sub>2</sub>SO<sub>4</sub>, filtered and concentrated. The residue was purified by a silica gel chromatography with (PE/EA = 5/1) as the eluent to give compound **10** (75%, 87% ee, 34.7 mg) as a white solid

**M.p.:** 84-86 °C.

**IR** (film)  $\nu_{\text{max}}/\text{cm}^{-1}$ : 3030, 2922, 1715, 1683, 1558, 1456, 1241, 1219, 1071, 812, 751, 695.

**<sup>1</sup>H NMR** (400 MHz, CDCl<sub>3</sub>):  $\delta$  7.76 (d, *J* = 9.7 Hz, 1H), 7.62 (s, 1H), 7.56 (d, *J* = 8.7 Hz, 1H), 7.49 (d, *J* = 7.1 Hz, 2H), 7.36 (t, *J* = 7.6 Hz, 2H), 7.29 (d, *J* = 7.4 Hz, 1H), 7.24 (d, *J* = 1.7 Hz, 2H), 7.18–7.14 (m, 3H), 7.06 (s, 2H), 6.91 (s, 1H), 6.78 (d, *J* = 9.6 Hz, 1H), 6.37 (d, *J* = 8.7 Hz, 1H), 3.88 (s, 3H), 2.30 (s, 3H).

**<sup>13</sup>C NMR** (101 MHz, CDCl<sub>3</sub>):  $\delta$  165.4, 160.1, 140.9, 139.7, 137.0, 136.8, 133.5, 133.2, 130.0, 129.8, 128.9, 128.6, 128.2, 128.0, 127.6, 126.6, 126.5, 126.5, 121.7, 120.3, 113.4, 112.3, 108.9, 51.3, 10.4.

**HRMS (ESI) m/z:** [C<sub>14</sub>H<sub>12</sub>NO<sub>2</sub>+H]<sup>+</sup> calcd.: 461.1860; found: 451.1854.

**Optical Rotation:** [ $\alpha$ ]<sub>D</sub><sup>28</sup> = -2.1 (*c* = 1.0, CHCl<sub>3</sub>) [87% ee].

**Chiral HPLC:** 87% ee [Chiral MD(2), 250×4.6, *i*-PrOH/*n*-heptane = 30/70, 0.8 mL/min, 254 nm, t<sub>R</sub> = 40.13min (major), 55.03min (minor)].

**(S)-2-Methyl-1-(2-oxoquinolin-1(2H)-yl)-5-phenyl-1H-pyrrole-3-carboxylic acid (11):**

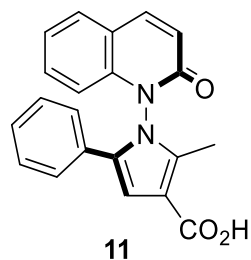

Compound **3a** (35.8 mg, 0.1 mmol, 1.0 equiv., 90% ee), KOH (40 mg, 1 mmol, 10 equiv.), 0.5 mL H<sub>2</sub>O and 1.5 mL MeOH were added to a reaction tube. Then, the reaction mixture was stirred at 80 °C for 8 h. After the completion of the reaction which

was indicated by TLC, the reaction mixture was quenched with 0.5 mL 6 N HCl and the aqueous layer was extracted with DCM (3×5 mL). The combined organic layers were dried over anhydrous Na<sub>2</sub>SO<sub>4</sub> and then concentrated under reduced pressure to afford product **11** (95% yield, 93% ee, 32.7 mg) as a solid.

**M.p.:** 187-189 °C.

**IR** (film)  $\nu_{\text{max}}/\text{cm}^{-1}$ : 3446, 1695, 1683, 1635, 1558, 1540, 1456, 1259, 1220, 1119, 827, 753, 696.

**<sup>1</sup>H NMR** (400 MHz, DMSO-*d*<sub>6</sub>):  $\delta$  12.38 (s, 1H), 8.14 (d, *J* = 9.7 Hz, 1H), 7.81 (d, *J* = 7.3 Hz, 1H), 7.52 (t, *J* = 7.5 Hz, 1H), 7.30 (t, *J* = 7.5 Hz, 1H), 7.18 (q, *J* = 6.4, 5.5 Hz, 5H), 6.89 – 6.79 (m, 2H), 6.29 (d, *J* = 8.4 Hz, 1H), 2.12 (s, 3H).

**<sup>13</sup>C NMR** (101 MHz, DMSO-*d*<sub>6</sub>):  $\delta$  165.5, 159.5, 141.9, 139.8, 136.1, 132.3, 132.0, 129.7, 129.3, 128.7, 127.8, 126.7, 124.0, 120.7, 119.7, 112.5, 112.2, 108.5, 10.0.

**HRMS (ESI) m/z:** [C<sub>14</sub>H<sub>12</sub>NO<sub>2</sub>+H]<sup>+</sup> calcd.: 345,1234; found: 345.1227..

**Optical Rotation:**  $[\alpha]_{\text{D}}^{28} = +3.8$  (*c* = 1.0, CHCl<sub>3</sub>) [93% *ee*].

**Chiral HPLC:** 93% *ee* [Chiral ND(2), 250×4.6, *i*-PrOH/*n*-heptane = 70/30, 0.8 mL/Fmin, 254 nm, *t*<sub>R</sub> = 11.13min (major), 20.53min (minor)].

**Methyl (S)-4-bromo-2-methyl-1-(2-oxoquinolin-1(2H)-yl)-5-phenyl-1H-pyrrole-3-carboxylate (12):**

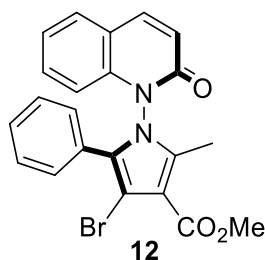

To a stirring solution of **3a** (35.8 mg, 0.1 mmol, 1.0 equiv., 90% ee) in DMF (1 mL) was added NBS (27.0 mg, 0.15 mmol, 1.5 equiv.). The resulting mixture was allowed to stir at 25 °C for 2 d. The reaction was quenched by the addition of water and the mixture was extracted with EtOAc. The organic phase was separated, washed with water and brine, dried over anhydrous Na<sub>2</sub>SO<sub>4</sub>, filtered and concentrated. The residue was purified by a silica gel chromatography with (PE/EA = 4/1) as the eluent to give compound **12** (91%, 90% ee, 39.8 mg) as a white solid.

**M.p.:** 138-140 °C.

**IR** (film)  $\nu_{\text{max}}/\text{cm}^{-1}$ : 2951, 1706, 1683, 1599, 1558, 1436, 1239, 1222, 1069, 825, 758, 706.

**<sup>1</sup>H NMR** (400 MHz, CDCl<sub>3</sub>):  $\delta$  7.68 (d, *J* = 9.7 Hz, 1H), 7.50 (d, *J* = 7.8 Hz, 1H), 7.45 (t, *J* = 8.6 Hz, 1H), 7.30–7.26 (m, 2H), 7.22 (t, *J* = 8.1 Hz, 1H), 7.20–7.16 (m, 3H), 6.68 (d, *J* = 9.7 Hz, 1H), 6.43 (d, *J* = 8.6 Hz, 1H), 3.90 (s, 3H), 2.26 (s, 3H).

**<sup>13</sup>C NMR** (101 MHz, CDCl<sub>3</sub>):  $\delta$  164.3, 160.0, 141.1, 140.2, 137.0, 132.1, 131.8, 130.2, 128.9, 128.3, 128.2, 124.1, 121.1, 119.9, 112.8, 111.7, 96.8, 51.4, 11.2.

**HRMS (ESI) m/z:** [C<sub>22</sub>H<sub>17</sub>BrN<sub>2</sub>O<sub>4</sub>+H]<sup>+</sup> calcd.: 437.0496; found: 437.0487.

**Optical Rotation:**  $[\alpha]_{\text{D}}^{28} = -1.2$  (*c* = 1.0, CHCl<sub>3</sub>) [90% *ee*].

**Chiral HPLC:** 90% *ee* [Chiral MD(2), 250×4.6, *i*-PrOH/*n*-heptane = 25/75, 0.7



mL/min, 254 nm,  $t_R$  = 10.90min (major), 15.75min (minor)].

**Methyl (R)-2-formyl-1-(2-oxoquinolin-1(2H)-yl)-5-phenyl-1H-pyrrole-3-carboxylate (13):**

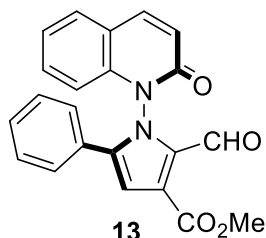

Compound **3a** (35.8 mg, 0.1 mmol, 1.0 equiv., 90% ee), CAN (530.0 mg, 1 mmol, 10 equiv.) and 3.2 mL THF were added to a reaction tube. Then, 3.2 mL HOAc and 3.2 mL H<sub>2</sub>O were added to the reaction mixture, which was stirred at room temperature for 8 h. After that the reaction mixture was quenched with H<sub>2</sub>O and the aqueous layer was extracted with EtOAc (3×10 mL). The combined organic layers were dried over anhydrous Na<sub>2</sub>SO<sub>4</sub> and then concentrated under reduced pressure. The residue was purified through flash column chromatography on silica gel (PE/EA = 5/1) to afford the product **13** (97% yield, 90% ee, 36.1 mg) as a solid.

**M.p.:** 100-102 °C.

**IR** (film)  $\nu_{\max}/\text{cm}^{-1}$ : 3029, 2946, 1705, 1683, 1568, 1436, 1242, 1220, 1072, 826, 775, 696.

**<sup>1</sup>H NMR** (400 MHz, CDCl<sub>3</sub>):  $\delta$  10.31 (s, 1H), 7.76 (d,  $J$  = 9.7 Hz, 1H), 7.55 (d,  $J$  = 7.8 Hz, 1H), 7.41–7.31 (m, 3H), 7.27–7.17 (m, 5H), 7.06 (s, 1H), 6.72 (d,  $J$  = 9.7 Hz, 1H), 6.36 (d,  $J$  = 8.4 Hz, 1H), 3.96 (s, 3H).

**<sup>13</sup>C NMR** (101 MHz, CDCl<sub>3</sub>):  $\delta$  180.4, 163.4, 160.5, 141.2, 140.6, 140.5, 131.6, 129.6, 129.5, 129.0, 128.9, 128.3, 128.0, 124.1, 123.8, 121.2, 120.2, 112.2, 111.3, 52.4.

**HRMS (ESI) m/z:** [C<sub>22</sub>H<sub>16</sub>N<sub>2</sub>O<sub>4</sub>+H]<sup>+</sup> calcd.: 373.1183; found:373.1171.

**Optical Rotation:**  $[\alpha]_D^{28} = -7.6$  ( $c$  = 1.0, CHCl<sub>3</sub>) [90% ee].

**Chiral HPLC:** 90% ee [Chiral MD(2), 250×4.6, *i*-PrOH/*n*-heptane = 50/50, 0.8 mL/min, 254 nm,  $t_R$  = 10.50min (major), 24.26min (minor)].

**Methyl (R)-2-(hydroxymethyl)-1-(2-oxoquinolin-1(2H)-yl)-5-phenyl-1H-pyrrole-3-carboxylate (14):**

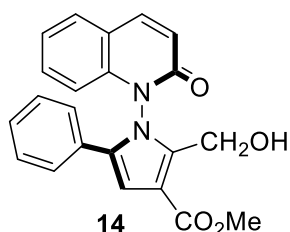

Compound **13** (22.3 mg, 0.06 mmol, 1.0 equiv., 90% ee) and 1 mL MeOH were added to a reaction tube. Then, NaBH<sub>4</sub> (3.5 mg, 0.09 mmol, 1.5 equiv.) was added to the reaction mixture, which was stirred at 0 °C for 12 h. After the completion of the reaction which was indicated by TLC, the reaction mixture was quenched with acetone and then

concentrated under reduced pressure. The residue was purified through flash column chromatography on silica gel (PE/EA = 2/1) to afford product **14** (95% yield, 90% ee, 21.4 mg) as a solid.

**M.p.:** 84-86 °C.

**IR** (film)  $\nu_{\max}/\text{cm}^{-1}$ : 3446, 3055, 2947, 1716, 1683, 1597, 1449, 1244, 1201, 1086, 829, 749, 698.

**<sup>1</sup>H NMR (400 MHz, CDCl<sub>3</sub>):**  $\delta$  7.77 (d,  $J$  = 9.7 Hz, 1H), 7.54 (d,  $J$  = 7.8 Hz, 1H), 7.42 (t,  $J$  = 8.6 Hz, 1H), 7.25–7.14 (m, 6H), 6.92 (s, 1H), 6.74 (d,  $J$  = 9.6 Hz, 1H), 6.45 (d,  $J$  = 8.1 Hz, 1H), 4.57 (d,  $J$  = 13.9 Hz, 1H), 4.41 (d,  $J$  = 13.9 Hz, 1H), 3.92 (s, 3H).

**<sup>13</sup>C NMR (101 MHz, CDCl<sub>3</sub>):**  $\delta$  165.7, 160.7, 141.4, 140.6, 139.2, 134.0, 131.9, 129.5, 128.8, 128.6, 128.3, 127.8, 124.2, 120.8, 119.8, 113.7, 113.0, 109.2, 54.2, 51.9.

**HRMS (ESI) m/z:** [C<sub>14</sub>H<sub>12</sub>NO<sub>2</sub>+H]<sup>+</sup> calcd.: 375.1340; found: 375.1337.

**Optical Rotation:**  $[\alpha]_D^{28} = +4.8$  ( $c$  = 1.0, CHCl<sub>3</sub>) [89% ee].

**Chiral HPLC:** 89% ee [Chiral MD(2), 250×4.6, *i*-PrOH/*n*-heptane = 25/75, 0.8 mL/min, 254 nm,  $t_R$  = 16.66 min (major), 31.04 min (minor)].

**Methyl (R)-1-(2-oxoquinolin-1(2H)-yl)-5-phenyl-2-vinyl-1H-pyrrole-3-carboxylate (15):**

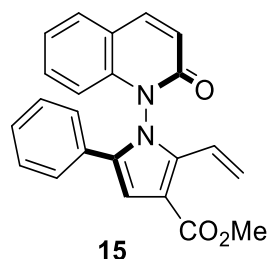

To a solution of Ph<sub>3</sub>PCH<sub>3</sub>Br (53.6 mg, 0.15 mmol, 1.5 equiv.) in dry THF (0.5 mL) was added KO<sup>t</sup>Bu (16.8 mg, 0.15 mmol, 1.5 equiv.) under nitrogen atmosphere. The mixture was allowed to stir for 1 h at 0 °C. After that, **13** (37.2 mg, 0.1 mmol, 1.0 equiv., 90% ee) was added. The system was allowed to warm to room temperature slowly and stir for 12 h. The reaction mixture was concentrated under reduced pressure and directly purified by silica gel chromatography (PE/EA = 3/1) to afford compound **15** (82%, 89% ee, 30.5 mg).

**M.p.:** 122-124 °C.

**IR** (film)  $\nu_{\max}/\text{cm}^{-1}$ : 3059, 2951, 1707, 1682, 1653, 1599, 1448, 1242, 1213, 1067, 1012, 906, 829, 763, 734, 698.

**<sup>1</sup>H NMR (400 MHz, CDCl<sub>3</sub>):**  $\delta$  7.74 (d,  $J$  = 9.6 Hz, 1H), 7.54 (d,  $J$  = 7.7 Hz, 1H), 7.42 (t,  $J$  = 8.5 Hz, 1H), 7.28–7.19 (m, 3H), 7.18–7.14 (m, 3H), 7.05–6.95 (m, 2H), 6.73 (d,  $J$  = 9.7 Hz, 1H), 6.42 (d,  $J$  = 8.4 Hz, 1H), 5.19–5.08 (m, 2H), 3.88 (s, 3H).

**<sup>13</sup>C NMR (101 MHz, CDCl<sub>3</sub>):**  $\delta$  164.8, 160.4, 141.1, 140.6, 135.4, 134.7, 131.9, 129.6, 128.8, 128.6, 128.4, 128.2, 124.0, 123.6, 121.4, 119.9, 118.0, 114.1, 113.2, 110.3, 51.6.

**HRMS (ESI) m/z:** [C<sub>14</sub>H<sub>12</sub>NO<sub>2</sub>+H]<sup>+</sup> calcd.: 371.1390; found: 371.1383.

**Optical Rotation:**  $[\alpha]_D^{28} = -1.9$  ( $c$  = 1.0, CHCl<sub>3</sub>) [90% ee].

**Chiral HPLC:** 89% ee [Chiral MD(2), 250×4.6, *i*-PrOH/*n*-heptane = 25/75, 0.7 mL/min, 254 nm,  $t_R$  = 13.40 min (major), 16.06 min (minor)].

## (5) X-ray Crystallographic Date for Compound 3n and 5g

Crystallographic data for **3n**:  $C_{23}H_{20}N_2O_3$ ,  $M = 372.41$ , orthorhombic, P 21 (No. 19),  $a = 9.1943(4) \text{ \AA}$ ,  $b = 14.3898(6) \text{ \AA}$ ,  $c = 14.7328(6) \text{ \AA}$ ,  $V = 1949.21(14) \text{ \AA}^3$ ,  $Z = 4$ , Crystal size:  $0.07 \times 0.05 \times 0.02 \text{ mm}$ ,  $T = 256 \text{ K}$ ,  $\rho_{\text{calcd}} = 1.269 \text{ g}\cdot\text{cm}^{-3}$ ,  $R_1 = 0.0405$  ( $I > 4\sigma(I)$ ),  $wR_2 = 0.1125$  (all data),  $GOF = 1.052$ , reflections collected/unique: 21328 / 3427 ( $R_{\text{int}} = 0.0708$ ), Data: 3186, restraints: 0, parameters: 253. CCDC (2267510) contains the supplementary crystallographic data for this paper. The data can be obtained free of charge from The Cambridge Crystallographic Data Centre via [www.ccdc.cam.ac.uk/data\\_request/cif](http://www.ccdc.cam.ac.uk/data_request/cif).

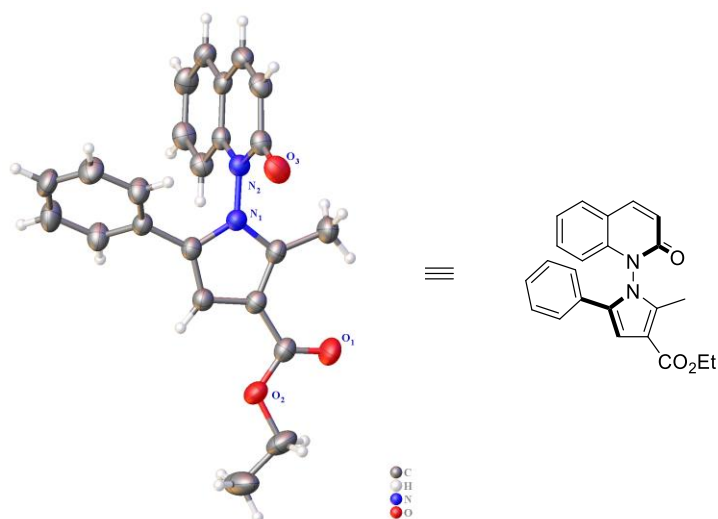

Crystallographic data for **5g**:  $C_{20}H_{17}N_3O_3S$ ,  $M = 379.42$ , monoclinic, P 21 (No. 4),  $a = 7.3762(12) \text{ \AA}$ ,  $b = 9.0242(15) \text{ \AA}$ ,  $c = 13.612(2) \text{ \AA}$ ,  $\beta = 102.049(5)^\circ$ ,  $V = 886.1(3) \text{ \AA}^3$ ,  $Z = 2$ , Crystal size:  $0.35 \times 0.28 \times 0.25 \text{ mm}$ ,  $T = 211 \text{ K}$ ,  $\rho_{\text{calcd}} = 1.422 \text{ g}\cdot\text{cm}^{-3}$ ,  $R_1 = 0.05$  ( $I > 4\sigma(I)$ ),  $wR_2 = 0.1412$  (all data),  $GOF = 1.069$ , reflections collected/unique: 9166 / 2955 ( $R_{\text{int}} = 0.0401$ ), Data: 2910, restraints: 0, parameters: 244. CCDC (2267692) contains the supplementary crystallographic data for this paper. The data can be obtained free of charge from The Cambridge Crystallographic Data Centre via [www.ccdc.cam.ac.uk/data\\_request/cif](http://www.ccdc.cam.ac.uk/data_request/cif).

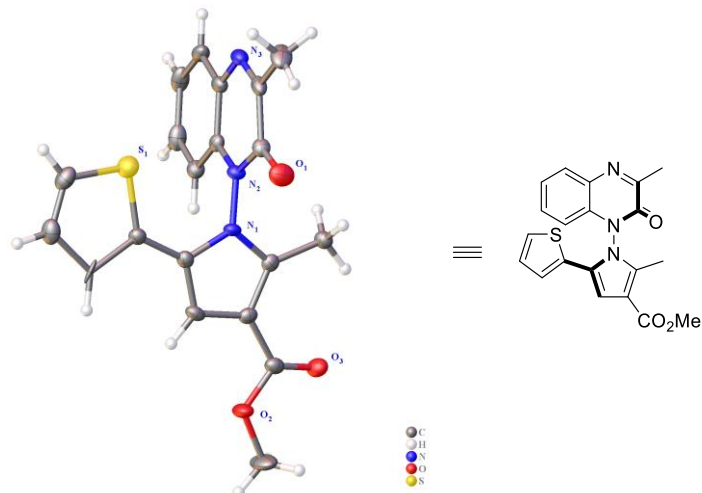

## (6) Details of Calculation and Discussion

All of the DFT calculations were performed with the Gaussian 09 program package.<sup>7</sup> The geometry optimization of all the minima involved were performed at the M06-2X level of theory with Grimme's D3 empirical dispersion correction and def2-SVP basis set for all atoms (keyword 5D).<sup>8</sup> To obtain accurate energies, single-point energy calculations were performed at the M06-2X//def2-TZVP level<sup>9</sup>, based on the optimized structures. The structures of the reactants, intermediates, transition states, and products were fully optimized without any restriction. The vibrational frequencies were computed at the same level to check whether each optimized structure is an energy minimum or a transition state and to evaluate its zero-point vibrational energy (ZPVE) and thermal corrections at 298 K. Solvent effects were computed using the SMD model<sup>10</sup> in CCl<sub>4</sub>. The 3D structures of the optimized intermediates or transition states were demonstrated using CYLView software<sup>11</sup>. Noncovalent interaction (NCI) analyses were carried out using the Multiwfn 3.8 program.<sup>12-13</sup> Atoms-in-molecules (AIM) analyses<sup>14</sup> were used to explore the origin of stereoselectivity.

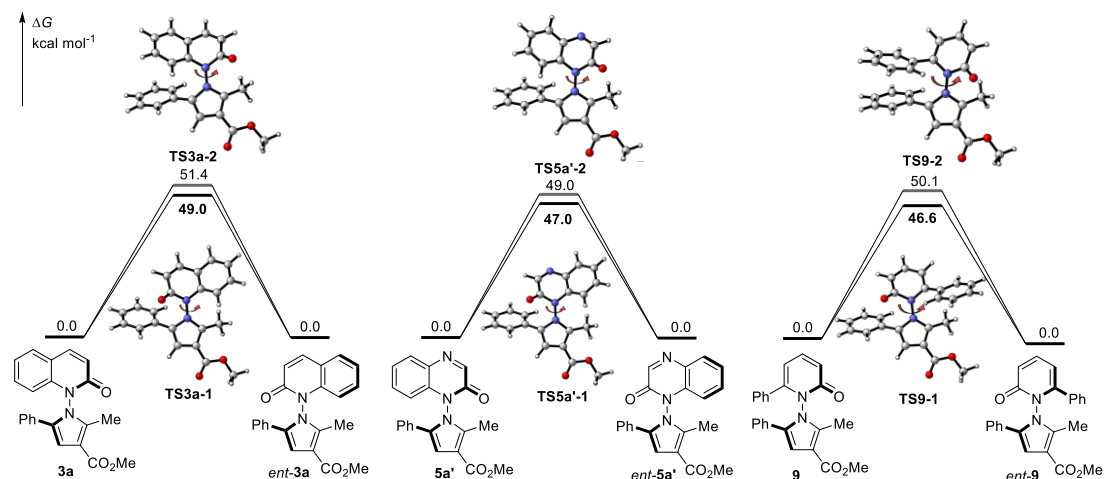

**Fig. S1** DFT calculated prediction of rotational barriers of N–N axially chiral molecules.

### DFT-Computed Energies of All Stationary Points

**Table S1.** Sum of electronic and zero-point energy ( $E$ , in Hartree), thermal enthalpy ( $H$ , in Hartree), thermal free energies ( $G$ , in Hartree), thermal correction to Gibbs free energy (CGFE, in Hartree), single-point energy ( $E_{\text{sol}}$ , in Hartree). For transition state structures, one imaginary frequency (Ifreq.) was observed and given below. For all minimum structures, no imaginary frequency was observed.

| Structure     | $E$          | $H$          | $G$          | CGFE     | $E_{\text{sol}}$ | Ifreq  |
|---------------|--------------|--------------|--------------|----------|------------------|--------|
| <b>3a</b>     | -1182.696363 | -1182.672916 | -1182.749699 | 0.305239 | -1184.363655     |        |
| <b>TS3a-1</b> | -1182.622405 | -1182.600407 | -1182.671365 | 0.309167 | -1184.289443     | -21.11 |
| <b>TS3a-2</b> | -1182.617479 | -1182.595287 | -1182.667133 | 0.308023 | -1184.284581     | -33.87 |

|                |              |              |              |          |              |        |
|----------------|--------------|--------------|--------------|----------|--------------|--------|
| <b>5a'</b>     | -1198.721802 | -1198.698467 | -1198.775241 | 0.293357 | -1200.397961 |        |
| <b>TS5a'-1</b> | -1198.65064  | -1198.628738 | -1198.699965 | 0.297074 | -1200.326698 | -22.76 |
| <b>TS5a'-2</b> | -1198.646318 | -1198.624234 | -1198.696334 | 0.295756 | -1200.322273 | -33.07 |
| <b>9</b>       | -1259.97715  | -1259.951668 | -1260.033425 | 0.336111 | -1261.762852 |        |
| <b>TS9-1</b>   | -1259.907654 | -1259.883487 | -1259.959579 | 0.339492 | -1261.692043 | -28.65 |
| <b>TS9-2</b>   | -1259.901303 | -1259.877326 | -1259.953123 | 0.340364 | -1261.687226 | -13.87 |

**Table S2.** Sum of electronic and zero-point energy ( $E$ , in Hartree), thermal enthalpy ( $H$ , in Hartree), thermal free energies ( $G$ , in Hartree), thermal correction to Gibbs free energy (CGFE, in Hartree), single-point energy ( $E_{\text{sol}}$ , in Hartree). For transition state structures, one imaginary frequency (Ifreq.) was observed and given below. For all minimum structures, no imaginary frequency was observed.

| Structure                | $E$          | $H$          | $G$          | CGFE     | $E_{\text{sol}}$ | Ifreq   |
|--------------------------|--------------|--------------|--------------|----------|------------------|---------|
| <b>C1</b>                | -1994.601113 | -1994.564837 | -1994.666832 | 0.554336 | -1997.202061     |         |
| <b>INT1</b>              | -1258.991259 | -1258.966085 | -1259.04765  | 0.328056 | -1260.782123     |         |
| <b>INT2</b>              | -1258.994075 | -1258.969077 | -1259.047709 | 0.332132 | -1260.781603     |         |
| <b>TS1-Rs</b>            | -3253.622843 | -3253.562606 | -3253.713852 | 0.915565 | -3258.001114     | -98.76  |
| <b>TS1-Ss</b>            | -3253.619948 | -3253.55956  | -3253.712223 | 0.912995 | -3257.995827     | -181.14 |
| <b>TS1-Rr</b>            | -3253.616472 | -3253.556438 | -3253.707155 | 0.915753 | -3257.993230     | -146.42 |
| <b>TS1-Sr</b>            | -3253.61801  | -3253.558127 | -3253.707513 | 0.918271 | -3257.996840     | -76.07  |
| <b>INT3-Rs</b>           | -3253.650143 | -3253.588978 | -3253.741389 | 0.917685 | -3258.029152     |         |
| <b>INT3-Ss</b>           | -3253.655765 | -3253.595275 | -3253.74754  | 0.917134 | -3258.031024     |         |
| <b>INT3-Rr</b>           | -3253.648688 | -3253.587917 | -3253.740759 | 0.916096 | -3258.026305     |         |
| <b>INT3-Sr</b>           | -3253.640912 | -3253.57928  | -3253.735988 | 0.912926 | -3258.020073     |         |
| <b>TS2-Rs</b>            | -3253.605635 | -3253.544735 | -3253.697964 | 0.914786 | -3257.985245     | -258.98 |
| <b>TS2-Ss</b>            | -3253.607942 | -3253.546148 | -3253.702591 | 0.910815 | -3257.986306     | -176.92 |
| <b>TS2-Rr</b>            | -3253.600029 | -3253.538649 | -3253.693298 | 0.912718 | -3257.985024     | -232.04 |
| <b>TS2-Sr</b>            | -3253.614081 | -3253.552611 | -3253.706714 | 0.913288 | -3257.995706     | -66.89  |
| <b>INT4-Rs</b>           | -3253.620438 | -3253.557398 | -3253.716998 | 0.90901  | -3258.00333      |         |
| <b>INT4-Ss</b>           | -3253.619437 | -3253.557575 | -3253.71351  | 0.909971 | -3257.992404     |         |
| <b>INT4-Rr</b>           | -3253.610393 | -3253.54796  | -3253.704459 | 0.911873 | -3257.992407     |         |
| <b>INT4-Sr</b>           | -3253.619546 | -3253.55696  | -3253.713223 | 0.912091 | -3258.004606     |         |
| <b>TS3-Rs</b>            | -3253.619437 | -3253.557575 | -3253.71351  | 0.909971 | -3258.001108     | -93.89  |
| <b>TS3-Ss</b>            | -3253.611016 | -3253.548899 | -3253.705727 | 0.907425 | -3257.987256     | -293.45 |
| <b>TS3-Rr</b>            | -3253.605506 | -3253.543535 | -3253.699624 | 0.908794 | -3257.985424     | -247.60 |
| <b>TS3-Sr</b>            | -3253.615337 | -3253.553366 | -3253.708994 | 0.909542 | -3257.996484     | -333.29 |
| <b>C1-H<sub>2</sub>O</b> | -2070.939223 | -2070.900127 | -2071.007102 | 0.57852  | -2073.659075     |         |

### Cartesian coordinates of all the stationary point

|           |            |             |             |   |            |             |             |
|-----------|------------|-------------|-------------|---|------------|-------------|-------------|
| <b>3a</b> |            |             |             | O | 0.21467100 | -0.72616700 | -2.87675900 |
| C         | 0.92549300 | -1.13385200 | -1.98518400 | N | 0.62018000 | -0.85231700 | -0.63949100 |
| C         | 2.14558300 | -1.91916000 | -2.17307700 | C | 3.29007300 | -2.47296300 | 1.33095200  |
| C         | 2.52991800 | -2.03658300 | 0.23234700  | H | 4.19649100 | -3.05083300 | 1.13965300  |
| C         | 1.35914200 | -1.28566200 | 0.46513500  | C | 0.95743000 | -0.98874700 | 1.77653900  |

|               |             |             |             |               |             |             |             |
|---------------|-------------|-------------|-------------|---------------|-------------|-------------|-------------|
| H             | 0.05010100  | -0.41187000 | 1.95746200  | C             | -4.07222700 | -1.63721500 | 0.12117200  |
| C             | 2.89906000  | -2.17694700 | 2.62579800  | H             | -4.78618800 | -2.31208600 | 0.59771200  |
| H             | 3.49533500  | -2.51661900 | 3.47297800  | C             | -2.21454200 | -0.04952100 | -1.22038400 |
| C             | 1.72913100  | -1.43624900 | 2.83981900  | H             | -1.50131100 | 0.52144900  | -1.80833000 |
| H             | 1.41303100  | -1.20164100 | 3.85737300  | C             | -4.51322800 | -0.58256600 | -0.66496600 |
| C             | -1.75408400 | -0.60470300 | -0.30635800 | H             | -5.58010000 | -0.38717700 | -0.77675500 |
| C             | -0.46007400 | 1.26991200  | -0.08563900 | C             | -3.57725500 | 0.17633000  | -1.37424300 |
| C             | -2.56645600 | 0.44890500  | 0.08973800  | H             | -3.90983400 | 0.94899900  | -2.06906600 |
| C             | -1.74843900 | 1.61310900  | 0.23416200  | C             | 1.95063800  | -0.58717100 | 0.11469600  |
| H             | -2.10179400 | 2.60366100  | 0.50796700  | C             | 0.42756500  | 1.07859100  | -0.23376300 |
| N             | -0.48918900 | -0.08406600 | -0.40700300 | C             | 2.63409900  | 0.59935800  | -0.13602500 |
| C             | -1.99415900 | -2.04142500 | -0.61784900 | C             | 1.68232400  | 1.62522200  | -0.34345800 |
| H             | -1.78180900 | -2.23622800 | -1.68070000 | H             | 1.90036400  | 2.68711100  | -0.42280500 |
| H             | -1.33624100 | -2.68698700 | -0.01561400 | N             | 0.60375700  | -0.30802000 | -0.05935000 |
| H             | -3.03533600 | -2.30042100 | -0.40972000 | C             | 2.51110100  | -1.82170400 | 0.74820500  |
| C             | 0.78217000  | 2.05984300  | -0.10498500 | H             | 1.76380200  | -2.29787800 | 1.39759100  |
| C             | 1.65813300  | 2.00438500  | -1.20004900 | H             | 2.85870100  | -2.56587100 | 0.02238700  |
| C             | 1.09530000  | 2.89354000  | 0.97743200  | H             | 3.35899900  | -1.51617100 | 1.36951500  |
| C             | 2.83244200  | 2.75335400  | -1.19809400 | C             | -0.77044600 | 1.86882800  | 0.11906500  |
| H             | 1.39182400  | 1.40265900  | -2.07150100 | C             | -1.50682400 | 1.56977600  | 1.27462600  |
| C             | 2.26339800  | 3.65247400  | 0.96816300  | C             | -1.12868000 | 2.98664500  | -0.64396900 |
| H             | 0.41967800  | 2.93134000  | 1.83422900  | C             | -2.60750500 | 2.34312900  | 1.62950800  |
| C             | 3.13890000  | 3.57748700  | -0.11485100 | H             | -1.21847400 | 0.71300600  | 1.88840800  |
| H             | 3.50463200  | 2.70486100  | -2.05638700 | C             | -2.22541100 | 3.76630700  | -0.28035300 |
| H             | 2.49674300  | 4.29764400  | 1.81683800  | H             | -0.55555000 | 3.22742800  | -1.54197300 |
| H             | 4.05749200  | 4.16663000  | -0.11754100 | C             | -2.97622000 | 3.44023700  | 0.84873200  |
| C             | -4.02009200 | 0.48224800  | 0.32076700  | H             | -3.17913900 | 2.09064500  | 2.52421900  |
| C             | -6.03361200 | -0.70710200 | 0.29290000  | H             | -2.50001900 | 4.62953400  | -0.88924400 |
| H             | -6.36683100 | -1.72339400 | 0.05724600  | H             | -3.84183400 | 4.04421800  | 1.12543500  |
| H             | -6.28893300 | -0.45634300 | 1.33194100  | C             | 4.07963400  | 0.86947900  | -0.10954900 |
| H             | -6.52332000 | 0.01583900  | -0.37383700 | C             | 6.23403000  | -0.01938600 | 0.08877900  |
| O             | -4.62206300 | 1.46526700  | 0.67272200  | H             | 6.69076000  | -1.00642100 | 0.21869200  |
| O             | -4.62684700 | -0.69397600 | 0.10153500  | H             | 6.57645400  | 0.43482500  | -0.85117700 |
| C             | 2.89677600  | -2.33431000 | -1.13247600 | H             | 6.51649300  | 0.64087800  | 0.92062500  |
| H             | 3.80694100  | -2.91306100 | -1.30683000 | O             | 4.56048400  | 1.96703300  | -0.24683400 |
| H             | 2.40277300  | -2.13686300 | -3.20923600 | O             | 4.83055200  | -0.22899700 | 0.06391400  |
|               |             |             |             | C             | -2.21362500 | -3.15236700 | 0.81428700  |
|               |             |             |             | H             | -2.90253500 | -3.80264100 | 1.35742000  |
|               |             |             |             | H             | -0.57604400 | -4.54347700 | 0.74341300  |
| <b>TS3a-1</b> |             |             |             | <b>TS3a-2</b> |             |             |             |
| C             | -0.05886400 | -2.66474500 | -0.25070200 | C             | -0.96483400 | 2.08484000  | 0.11344600  |
| C             | -0.96538500 | -3.55223800 | 0.50839200  | C             | -2.20323300 | 2.61037000  | -0.32646400 |
| C             | -2.70196900 | -1.89813100 | 0.26891100  | C             | -2.00541800 | 0.09483600  | 0.89361500  |
| C             | -1.76370200 | -1.01817300 | -0.31727500 |               |             |             |             |
| O             | 0.86988100  | -3.03362800 | -0.91786600 |               |             |             |             |
| N             | -0.39560500 | -1.28994400 | -0.05063500 |               |             |             |             |

|   |             |             |             |   |             |             |             |
|---|-------------|-------------|-------------|---|-------------|-------------|-------------|
| N | -0.87974200 | 0.67533100  | 0.21988400  | C | 0.95702600  | -1.13261600 | -1.96204600 |
| C | 1.61142900  | 0.36320900  | -0.08774900 | C | 2.19823400  | -1.93795900 | -2.07811600 |
| C | 0.28763800  | -1.46589800 | 0.25336000  | C | 2.51192300  | -2.04307000 | 0.19860000  |
| C | 2.41869700  | -0.75337200 | 0.11449700  | C | 1.35226400  | -1.28393100 | 0.45836800  |
| C | 1.59020300  | -1.88360900 | 0.32219300  | O | 0.30211200  | -0.75285600 | -2.90334700 |
| H | 1.92478500  | -2.91560000 | 0.38336100  | N | 0.61726900  | -0.83648500 | -0.64295400 |
| N | 0.30448200  | -0.06955900 | 0.11258800  | C | 3.28306500  | -2.50531200 | 1.27584700  |
| C | -2.33822300 | 3.99450300  | -0.50219700 | H | 4.17447500  | -3.08773100 | 1.03981900  |
| C | 2.05076500  | 1.61257000  | -0.80318000 | C | 0.96794800  | -1.00086100 | 1.77520300  |
| H | 1.23078800  | 2.06561200  | -1.36743500 | H | 0.06863100  | -0.41609300 | 1.97214800  |
| H | 2.49555900  | 2.37383300  | -0.14988000 | C | 2.90928500  | -2.22352300 | 2.57911100  |
| H | 2.82836600  | 1.31502700  | -1.51488800 | H | 3.51187800  | -2.58262100 | 3.41362900  |
| C | -0.87568400 | -2.32929100 | -0.03109700 | C | 1.75026000  | -1.47350100 | 2.82075000  |
| C | -1.67858000 | -2.05799900 | -1.14795200 | H | 1.45133900  | -1.25171600 | 3.84627700  |
| C | -1.13753200 | -3.47007800 | 0.73561400  | N | 2.90640200  | -2.34841400 | -1.09563100 |
| C | -2.73794900 | -2.90077000 | -1.47730600 | C | -1.75941500 | -0.59507700 | -0.32278100 |
| H | -1.46584500 | -1.18150800 | -1.76493800 | C | -0.46624100 | 1.28193800  | -0.08311700 |
| C | -2.18919100 | -4.31782500 | 0.39528500  | C | -2.57103100 | 0.45314500  | 0.08511700  |
| H | -0.52341300 | -3.67578600 | 1.61401500  | C | -1.75497600 | 1.61769300  | 0.24080100  |
| C | -2.99759500 | -4.03323800 | -0.70603300 | H | -2.11047600 | 2.60471400  | 0.52448900  |
| H | -3.35499700 | -2.67630900 | -2.34929700 | N | -0.49445600 | -0.06892200 | -0.42328800 |
| H | -2.38779900 | -5.20244400 | 1.00288800  | C | -1.99698000 | -2.03058700 | -0.64178000 |
| H | -3.82548500 | -4.69530100 | -0.96471400 | H | -1.79036900 | -2.22220600 | -1.70629900 |
| C | 3.88183800  | -0.86867600 | 0.01147500  | H | -1.33724500 | -2.67848500 | -0.04392500 |
| C | 5.91707000  | 0.24542700  | -0.28588600 | H | -3.03702900 | -2.29200000 | -0.43106200 |
| H | 6.25945300  | 1.27483900  | -0.43685500 | C | 0.77557100  | 2.07234800  | -0.09724600 |
| H | 6.36126300  | -0.17090000 | 0.62869300  | C | 1.64627100  | 2.03037600  | -1.19701100 |
| H | 6.21584100  | -0.38138100 | -1.13755900 | C | 1.09401500  | 2.89128800  | 0.99479700  |
| O | 4.48305900  | -1.90980800 | 0.10123200  | C | 2.82161000  | 2.77772600  | -1.19087100 |
| O | 4.50322500  | 0.30706300  | -0.17534300 | H | 1.37630400  | 1.44040400  | -2.07560800 |
| C | 0.00887500  | 2.96860300  | 0.58989100  | C | 2.26313500  | 3.64866500  | 0.98991600  |
| H | -3.29203000 | 4.38292000  | -0.86525400 | H | 0.42237600  | 2.91878800  | 1.85510000  |
| H | 0.88066100  | 2.57907700  | 1.10810500  | C | 3.13359500  | 3.58687700  | -0.09797800 |
| C | -0.15359800 | 4.34066800  | 0.43221900  | H | 3.48996800  | 2.73997300  | -2.05262300 |
| C | -1.30698500 | 4.85942700  | -0.16183800 | H | 2.50145200  | 4.28214800  | 1.84593800  |
| H | 0.62254300  | 5.01275900  | 0.80146300  | H | 4.05298500  | 4.17465700  | -0.09697000 |
| H | -1.42289900 | 5.93518300  | -0.29686500 | C | -4.02512900 | 0.48122000  | 0.32068000  |
| O | -1.90771000 | -0.69823300 | 1.78827200  | C | -6.03515600 | -0.71424900 | 0.29051300  |
| C | -3.35274200 | 1.72183900  | -0.35588800 | H | -6.36533000 | -1.72961200 | 0.04703100  |
| H | -4.28941500 | 2.07532600  | -0.79203700 | H | -6.28486400 | -0.47451300 | 1.33344000  |
| C | -3.27933300 | 0.54560700  | 0.29258600  | H | -6.53113300 | 0.01307700  | -0.36663100 |
| H | -4.13284100 | -0.11480000 | 0.44904800  | O | -4.62616700 | 1.45992100  | 0.68476500  |
|   |             |             |             | O | -4.62899600 | -0.69361500 | 0.09131200  |
|   |             |             |             | H | 2.49530500  | -2.17316900 | -3.10602600 |

5a'

|                |             |             |             |                |             |             |             |
|----------------|-------------|-------------|-------------|----------------|-------------|-------------|-------------|
|                |             |             |             | O              | 4.79840200  | -0.28655800 | 0.14058200  |
| <b>TS5a'-1</b> |             |             |             | H              | -0.55607100 | -4.50024000 | 0.67135100  |
| C              | -0.07040000 | -2.61463800 | -0.35407900 |                |             |             |             |
| C              | -0.98250700 | -3.52275800 | 0.41585100  | <b>TS5a'-2</b> |             |             |             |
| C              | -2.65852400 | -2.00270600 | 0.29751000  | C              | 1.04994300  | 2.04701100  | -0.10119800 |
| C              | -1.79792400 | -1.03282000 | -0.26716000 | C              | 2.33405400  | 2.49046700  | 0.29772200  |
| O              | 0.86202600  | -2.98980900 | -1.00974100 | C              | 3.26649700  | 0.49323700  | -0.21967100 |
| N              | -0.40759600 | -1.26686800 | -0.09512100 | C              | 1.98941000  | 0.04487600  | -0.86716800 |
| C              | -4.04574900 | -1.81912000 | 0.23833900  | N              | 0.88617700  | 0.64296400  | -0.20430800 |
| H              | -4.67138300 | -2.57544500 | 0.71381400  | N              | 3.41036000  | 1.60833500  | 0.38338500  |
| C              | -2.35053600 | -0.04083900 | -1.08357400 | C              | -1.61491700 | 0.42707100  | 0.09933800  |
| H              | -1.70551800 | 0.60153200  | -1.67448400 | C              | -0.35392900 | -1.45353800 | -0.22333600 |
| C              | -4.58473600 | -0.75025700 | -0.46177100 | C              | -2.45807200 | -0.66042300 | -0.10405100 |
| H              | -5.66541100 | -0.61582000 | -0.51456400 | C              | -1.67006300 | -1.82187800 | -0.30037300 |
| C              | -3.73044700 | 0.10635700  | -1.16237800 | H              | -2.04243900 | -2.84080300 | -0.36233800 |
| H              | -4.13916300 | 0.89536000  | -1.79524800 | N              | -0.32151900 | -0.05637800 | -0.08273000 |
| N              | -2.16496800 | -3.21235200 | 0.78167400  | C              | 2.57573000  | 3.85902500  | 0.46302600  |
| C              | 1.91980400  | -0.57940900 | 0.12680900  | C              | -2.01716000 | 1.70063800  | 0.79288300  |
| C              | 0.43385300  | 1.10494100  | -0.31218200 | H              | -1.18588700 | 2.14372000  | 1.34821100  |
| C              | 2.63063600  | 0.58005200  | -0.15783600 | H              | -2.44507300 | 2.45780900  | 0.12354300  |
| C              | 1.70277400  | 1.61706200  | -0.42053100 | H              | -2.80176000 | 1.43803200  | 1.51075400  |
| H              | 1.94581800  | 2.67147100  | -0.52537100 | C              | 0.77925400  | -2.36107800 | 0.04194900  |
| N              | 0.57994400  | -0.27737900 | -0.07350200 | C              | 1.61714300  | -2.13237400 | 1.14258200  |
| C              | 2.43431200  | -1.81977700 | 0.78478800  | C              | 0.97658400  | -3.50375400 | -0.74028800 |
| H              | 1.65307300  | -2.28883500 | 1.39882300  | C              | 2.64894600  | -3.02084500 | 1.43884800  |
| H              | 2.80627400  | -2.56501100 | 0.07158300  | H              | 1.45295700  | -1.25588500 | 1.77485300  |
| H              | 3.25879600  | -1.52705800 | 1.44309700  | C              | 1.99935600  | -4.39756900 | -0.43184800 |
| C              | -0.73793900 | 1.93478200  | 0.04103700  | H              | 0.33396900  | -3.67508200 | -1.60552900 |
| C              | -1.44515100 | 1.68379700  | 1.22560800  | C              | 2.84393900  | -4.15583800 | 0.65187900  |
| C              | -1.09219500 | 3.04070800  | -0.74124900 | H              | 3.29520300  | -2.83063200 | 2.29766700  |
| C              | -2.51173200 | 2.49620100  | 1.59686300  | H              | 2.14608000  | -5.28403900 | -1.05122700 |
| H              | -1.15869600 | 0.83704500  | 1.85398300  | H              | 3.65010500  | -4.85311000 | 0.88518500  |
| C              | -2.15643300 | 3.85771400  | -0.36256700 | C              | -3.92657100 | -0.72307000 | -0.01290600 |
| H              | -0.54209600 | 3.24414500  | -1.66253500 | C              | -5.92335000 | 0.46586700  | 0.25158100  |
| C              | -2.87642600 | 3.58249500  | 0.79997000  | H              | -6.22852500 | 1.50729600  | 0.39897100  |
| H              | -3.05953000 | 2.28146400  | 2.51586500  | H              | -6.37250600 | 0.06554700  | -0.66769300 |
| H              | -2.42919200 | 4.71181100  | -0.98494200 | H              | -6.25239300 | -0.14983000 | 1.10004700  |
| H              | -3.71539600 | 4.21744600  | 1.08884000  | O              | -4.56104800 | -1.74427800 | -0.09711800 |
| C              | 4.08196500  | 0.81890300  | -0.10977100 | O              | -4.50637200 | 0.47514600  | 0.15494900  |
| C              | 6.20623300  | -0.11100700 | 0.19691300  | C              | 0.12665900  | 2.99605800  | -0.55036200 |
| H              | 6.63215000  | -1.10045400 | 0.39459700  | H              | 3.57042700  | 4.15429000  | 0.79908600  |
| H              | 6.58761500  | 0.28116300  | -0.75585700 | H              | -0.78480400 | 2.66900700  | -1.04170200 |
| H              | 6.48106300  | 0.58735900  | 0.99950400  | C              | 0.39477100  | 4.35369100  | -0.41206200 |
| O              | 4.59116400  | 1.89663800  | -0.29001000 | C              | 1.60197900  | 4.79238900  | 0.13837400  |



|          |             |             |             |              |             |             |             |
|----------|-------------|-------------|-------------|--------------|-------------|-------------|-------------|
| H        | -0.34237900 | 5.07623700  | -0.76532100 | C            | -2.20717000 | -2.62104200 | 2.06375800  |
| H        | 1.80033600  | 5.85815600  | 0.25490400  | H            | -3.25355500 | -0.92395500 | 1.22920300  |
| O        | 1.92311100  | -0.76371300 | -1.74764100 | C            | 0.11207800  | -2.25409000 | 2.62656200  |
| H        | 4.09483300  | -0.22218600 | -0.28486600 | H            | 0.87315600  | -0.26931100 | 2.29059000  |
| <b>9</b> |             |             |             | C            | -0.99292100 | -3.10313300 | 2.54993000  |
| C        | -0.53279900 | 2.82496000  | -0.16946300 | H            | -3.07287500 | -3.28169500 | 1.99617100  |
| C        | -1.61078500 | 3.62097400  | 0.38425400  | H            | 1.06305500  | -2.62483000 | 3.01183800  |
| C        | -2.37929400 | 1.75797700  | 1.73642600  | H            | -0.90542100 | -4.14265400 | 2.86997700  |
| C        | -1.36697600 | 0.96726700  | 1.27233500  | H            | -3.06928600 | 1.35070800  | 2.47273300  |
| O        | 0.26991100  | 3.18111500  | -1.00461400 | H            | -3.30308800 | 3.72639500  | 1.66187800  |
| N        | -0.47892800 | 1.49630100  | 0.34631900  | H            | -1.67863700 | 4.64381700  | 0.01562100  |
| C        | 1.79817000  | 0.74033000  | 0.05013200  | <b>TS9-1</b> |             |             |             |
| C        | 0.16557900  | -0.36521700 | -1.11002800 | C            | 0.77985600  | 2.69144600  | 0.41939300  |
| C        | 2.38317200  | -0.30387200 | -0.65276100 | C            | 0.42959800  | 3.92471600  | -0.29363400 |
| C        | 1.35657900  | -0.99572000 | -1.36361500 | C            | -1.61878400 | 2.90525400  | -1.01877700 |
| H        | 1.50645800  | -1.84387100 | -2.02615400 | C            | -1.25965700 | 1.71332000  | -0.46587700 |
| N        | 0.45834700  | 0.67767900  | -0.23406600 | O            | 1.62885000  | 2.59653700  | 1.27084900  |
| C        | 2.34631700  | 1.79917700  | 0.94322400  | N            | 0.08099500  | 1.54877500  | -0.08566700 |
| H        | 2.52863600  | 2.71891300  | 0.36639500  | C            | 2.15322100  | 0.32595700  | -0.20314900 |
| H        | 1.63139300  | 2.04650400  | 1.74184800  | C            | 0.31722300  | -0.95532300 | 0.27823800  |
| H        | 3.29008600  | 1.46930300  | 1.38727600  | C            | 2.58601100  | -0.92255300 | 0.21499500  |
| C        | -1.19458800 | -0.65865000 | -1.58731400 | C            | 1.44010600  | -1.71008600 | 0.50382300  |
| C        | -2.06655500 | 0.36039100  | -1.99914500 | H            | 1.44260500  | -2.78216400 | 0.68641200  |
| C        | -1.63159600 | -1.99034400 | -1.64056500 | N            | 0.77084300  | 0.33177000  | -0.08702700 |
| C        | -3.35475900 | 0.05207300  | -2.43151400 | C            | 2.95575400  | 1.42644900  | -0.81545800 |
| H        | -1.72189700 | 1.39620800  | -2.01560700 | H            | 2.31726100  | 2.09882500  | -1.40382100 |
| C        | -2.91289000 | -2.29575500 | -2.09139800 | H            | 3.48923300  | 2.01790200  | -0.06087700 |
| H        | -0.96195700 | -2.78283100 | -1.30037100 | H            | 3.69556600  | 0.97571900  | -1.48631800 |
| C        | -3.78239300 | -1.27494800 | -2.47807900 | C            | -0.92953500 | -1.59684200 | -0.21302700 |
| H        | -4.02225900 | 0.85478200  | -2.74916800 | C            | -1.21789900 | -1.51687300 | -1.58467900 |
| H        | -3.23966600 | -3.33647300 | -2.12751100 | C            | -1.69773100 | -2.44080400 | 0.59354200  |
| H        | -4.79052900 | -1.51384500 | -2.82083200 | C            | -2.26688000 | -2.24905300 | -2.13131400 |
| C        | 3.79873100  | -0.69410100 | -0.72853600 | H            | -0.59678900 | -0.88405000 | -2.22410200 |
| C        | 5.99674500  | -0.19419700 | -0.10770700 | C            | -2.74795800 | -3.17554200 | 0.04229300  |
| H        | 6.51823800  | 0.57939800  | 0.46600500  | H            | -1.47222800 | -2.51407100 | 1.65913000  |
| H        | 6.17776400  | -1.18273500 | 0.33711200  | C            | -3.03807300 | -3.08122500 | -1.31790500 |
| H        | 6.35966100  | -0.20449500 | -1.14460700 | H            | -2.47521700 | -2.18096100 | -3.20074800 |
| O        | 4.20238300  | -1.65828200 | -1.32852600 | H            | -3.34568300 | -3.82536100 | 0.68432800  |
| O        | 4.61692500  | 0.13512400  | -0.06108300 | H            | -3.85825100 | -3.66021400 | -1.74570600 |
| C        | -2.49311100 | 3.10249600  | 1.27872800  | C            | 3.95447000  | -1.45416200 | 0.28650100  |
| C        | -1.20759600 | -0.44238900 | 1.71363800  | C            | 6.23523500  | -1.00916400 | 0.02024900  |
| C        | -2.31472800 | -1.29668800 | 1.64435400  | H            | 6.86360400  | -0.15769800 | -0.26228000 |
| C        | 0.00763200  | -0.92897300 | 2.21438700  | H            | 6.48374300  | -1.34088700 | 1.03778100  |

|              |             |             |             |           |             |             |             |
|--------------|-------------|-------------|-------------|-----------|-------------|-------------|-------------|
| H            | 6.39872900  | -1.84669100 | -0.67207600 | H         | 5.61792500  | 1.78882600  | 1.68153000  |
| O            | 4.22490100  | -2.58122000 | 0.61804100  | H         | 6.57119900  | 0.62599300  | -0.30216200 |
| O            | 4.89261500  | -0.55391600 | -0.04600600 | C         | -1.63571600 | 3.31623000  | -0.13535300 |
| C            | -0.69226400 | 4.00101100  | -1.04705800 | C         | -3.81087000 | 4.04712200  | -0.58473200 |
| H            | -0.95476600 | 4.92458500  | -1.56618900 | H         | -4.75653200 | 3.60867400  | -0.92100100 |
| H            | -2.67373400 | 3.08275800  | -1.22817300 | H         | -3.93892000 | 4.51117700  | 0.40304100  |
| C            | -2.32326400 | 0.88357300  | 0.16674800  | H         | -3.47676900 | 4.81784200  | -1.29303300 |
| C            | -3.49006700 | 0.51509900  | -0.50830800 | O         | -1.32829900 | 4.44970500  | 0.13835000  |
| C            | -2.22508600 | 0.66611000  | 1.54829200  | O         | -2.87686000 | 2.98045000  | -0.52043900 |
| C            | -4.54222800 | -0.07380500 | 0.18894400  | O         | 2.12185500  | -1.20921000 | 1.54573900  |
| H            | -3.56407600 | 0.67719800  | -1.58542700 | C         | -1.85362200 | -2.07228900 | 0.04550800  |
| C            | -3.28426800 | 0.08792400  | 2.24229000  | C         | -2.08899500 | -1.45286100 | 1.27935500  |
| H            | -1.31682900 | 0.96254900  | 2.07859100  | C         | -2.91913900 | -2.66356600 | -0.64321000 |
| C            | -4.44493300 | -0.28491600 | 1.56514000  | C         | -3.37957300 | -1.40415200 | 1.80164600  |
| H            | -5.44372900 | -0.37251700 | -0.34881100 | H         | -1.25843800 | -1.00311800 | 1.82851200  |
| H            | -3.20105100 | -0.06999400 | 3.31885100  | C         | -4.20569400 | -2.61638500 | -0.11557800 |
| H            | -5.27322100 | -0.74405800 | 2.10730800  | H         | -2.74263200 | -3.13378800 | -1.61309800 |
| H            | 1.11397200  | 4.76105300  | -0.14965900 | C         | -4.44170900 | -1.97885500 | 1.10418600  |
| <b>TS9-2</b> |             |             |             | H         | -3.55322000 | -0.91381200 | 2.76069300  |
| C            | -0.45831600 | -2.18098300 | -0.45127500 | H         | -5.03231500 | -3.07035700 | -0.66452400 |
| C            | 0.00304600  | -3.37944900 | -0.90932500 | H         | -5.45290700 | -1.93342500 | 1.51140800  |
| C            | 2.21896000  | -2.88028100 | -0.14592200 | H         | -0.71431100 | -4.17850200 | -1.09280600 |
| C            | 1.66549800  | -1.71584200 | 0.55698900  | H         | 1.79210700  | -4.57152200 | -1.36950700 |
| N            | 0.49564600  | -1.20645000 | -0.11114000 | C         | 1.40987600  | -3.66820300 | -0.89092800 |
| C            | -0.91924900 | 0.84984300  | -0.42303300 | H         | 3.27134900  | -3.09559300 | 0.04177200  |
| C            | 1.25258800  | 1.10825600  | 0.24096300  | <b>C1</b> |             |             |             |
| C            | -0.71167900 | 2.17439400  | -0.05480700 | P         | -0.02669900 | -0.83926400 | -0.13272200 |
| C            | 0.63808300  | 2.32653500  | 0.35067500  | O         | 0.68685500  | -1.58356100 | 1.07411000  |
| H            | 1.13476300  | 3.26782500  | 0.56998300  | O         | -0.60657400 | -1.70358300 | -1.15784400 |
| N            | 0.26435300  | 0.17897400  | -0.13270500 | H         | -1.17638000 | 4.44417900  | -2.83602700 |
| C            | -2.03811300 | 0.36738900  | -1.30039200 | H         | -1.54807600 | 5.14052500  | -1.25105000 |
| H            | -1.72575600 | -0.48323200 | -1.91541500 | H         | -3.78483400 | 3.24495000  | -2.56065300 |
| H            | -2.94660300 | 0.09703200  | -0.74774400 | C         | -1.16014700 | 4.24079400  | -1.75625700 |
| H            | -2.29718600 | 1.19340000  | -1.97198200 | C         | -3.23128300 | 2.62844000  | -1.84996800 |
| C            | 2.71206400  | 0.91590300  | 0.13018000  | H         | 0.86690100  | 4.73423300  | -0.99147700 |
| C            | 3.25412400  | 0.27628600  | -0.99295400 | C         | 0.23926900  | 3.86630900  | -1.23907800 |
| C            | 3.57460800  | 1.46254000  | 1.08650800  | C         | -1.97960900 | 3.02480200  | -1.38938800 |
| C            | 4.63484500  | 0.16607500  | -1.14246200 | H         | 0.76699600  | 3.26778000  | -1.99771600 |
| H            | 2.58595200  | -0.13447700 | -1.75433800 | C         | -3.77197600 | 1.42420400  | -1.39742500 |
| C            | 4.95438600  | 1.36325800  | 0.92672800  | H         | -4.76121700 | 1.11023800  | -1.73608800 |
| H            | 3.15238000  | 1.94658400  | 1.96872300  | H         | -0.96738600 | 4.71078200  | 0.99658000  |
| C            | 5.48972700  | 0.70901100  | -0.18296500 | H         | 1.44300500  | 5.13856800  | 1.28184800  |
| H            | 5.04558300  | -0.33459400 | -2.02115000 | C         | -1.27880700 | 2.23335500  | -0.47147600 |

|   |             |             |             |             |             |             |             |
|---|-------------|-------------|-------------|-------------|-------------|-------------|-------------|
| C | -0.03411300 | 2.96442100  | -0.00258500 | H           | 4.31240100  | 0.07959100  | -3.19451300 |
| C | -0.33085300 | 3.84906300  | 1.24194400  | C           | -5.34597700 | -4.46661700 | 1.24989400  |
| C | 1.05534100  | 4.23504100  | 1.78043200  | H           | -5.63964000 | -4.43012300 | 2.30752100  |
| C | -3.06542600 | 0.57669800  | -0.53409400 | H           | -6.23309700 | -4.73459000 | 0.65683700  |
| C | -1.80237800 | 1.00250100  | -0.09576200 | H           | -4.61556800 | -5.28128000 | 1.12873000  |
| C | 1.21940200  | 2.24718900  | 0.46822500  | C           | -3.75141000 | 0.20567900  | 2.27966000  |
| C | 1.89013700  | 3.02967500  | 1.41687400  | H           | -2.67604800 | 0.34536700  | 2.47040400  |
| H | -0.86103400 | 3.23571900  | 1.98722400  | H           | -4.14689400 | 1.16738200  | 1.92035800  |
| O | 1.05712800  | 0.19317400  | -0.76060900 | H           | -4.23784800 | -0.03211500 | 3.23492800  |
| H | 1.05785400  | 4.43577800  | 2.86084200  | C           | -3.49772800 | -1.61505800 | -2.45794100 |
| C | 1.77152000  | 1.03001200  | 0.07828300  | H           | -3.53797600 | -2.58825600 | -2.96529900 |
| C | -3.86556100 | -1.76506700 | -1.00461900 | H           | -4.18327200 | -0.93414200 | -2.98514100 |
| C | -3.64243500 | -0.72372400 | -0.08068300 | H           | -2.47797500 | -1.21976300 | -2.55441800 |
| C | 3.13332300  | 2.64076900  | 1.90767000  | H           | 1.07688700  | -1.00334900 | 1.74697700  |
| O | -1.02601600 | 0.14980400  | 0.67956900  |             |             |             |             |
| C | 4.01408100  | -0.81828300 | -1.25861500 | <b>INT1</b> |             |             |             |
| C | 3.02931900  | 0.61467900  | 0.54883500  | C           | -6.13273400 | 0.66428400  | 0.00152700  |
| H | 3.65827100  | 3.25309100  | 2.64317500  | C           | -5.74622400 | -0.48532500 | -0.66350900 |
| C | 3.69937700  | 1.45022200  | 1.45351900  | C           | -4.45221100 | -1.01352400 | -0.49946800 |
| C | -4.42062300 | -2.96127400 | -0.54701400 | C           | -3.54082100 | -0.35133400 | 0.35311500  |
| H | 4.89984000  | -2.11674100 | -2.71973000 | C           | -3.93405500 | 0.82077700  | 1.02462200  |
| C | -3.97916700 | -0.89446700 | 1.27472600  | C           | -5.21742600 | 1.31119000  | 0.84613800  |
| H | -4.58026100 | -3.77346300 | -1.26175000 | H           | -7.13753800 | 1.06688700  | -0.12979600 |
| C | 4.60607400  | -2.00917800 | -1.67194700 | H           | -6.44013600 | -1.00553600 | -1.32710800 |
| C | 3.63884500  | -0.67207400 | 0.09718200  | H           | -3.22479300 | 1.33249300  | 1.67177000  |
| H | 4.67817500  | 1.13407600  | 1.82049200  | H           | -5.51289600 | 2.22023200  | 1.37265900  |
| C | -4.76379800 | -3.15476300 | 0.79406000  | C           | -4.01391300 | -2.21310600 | -1.16462100 |
| C | -4.53838400 | -2.10812600 | 1.68804900  | H           | -4.71657800 | -2.73055300 | -1.82197600 |
| C | 4.83488200  | -3.06936000 | -0.78637800 | C           | -2.76658800 | -2.69528400 | -0.97802500 |
| C | 3.86677900  | -1.72042600 | 1.00416400  | H           | -2.40939600 | -3.60476500 | -1.46072100 |
| H | -4.80448200 | -2.23568500 | 2.74076900  | N           | -2.25620800 | -0.85870800 | 0.49912600  |
| C | 4.45934900  | -2.90349200 | 0.54299100  | C           | -1.79600100 | -2.03453800 | -0.10631600 |
| H | 4.62191800  | -3.71949500 | 1.25265000  | N           | -1.49094200 | -0.31598600 | 1.53429400  |
| C | 5.46004700  | -4.34821600 | -1.27581500 | C           | -0.36559200 | 0.21034300  | 1.23351500  |
| H | 5.61941000  | -5.05800300 | -0.45349800 | C           | 0.46305100  | 0.69359700  | 2.38294100  |
| H | 4.81723500  | -4.83496900 | -2.02485800 | C           | 0.16783200  | 0.39178000  | -0.17440400 |
| H | 6.43110200  | -4.15542000 | -1.75596700 | H           | 0.79391000  | 1.72520400  | 2.21142500  |
| C | 3.48600400  | -1.64859300 | 2.46364300  | H           | -0.12020900 | 0.61669500  | 3.30767900  |
| H | 2.90258300  | -2.53639600 | 2.74929000  | H           | 1.36355900  | 0.06670200  | 2.47972900  |
| H | 4.38317300  | -1.63265700 | 3.10198000  | H           | -0.55751300 | -0.03197800 | -0.88171300 |
| H | 2.90722700  | -0.74987800 | 2.71716200  | C           | 0.19852000  | 1.87392500  | -0.51847600 |
| C | 3.79250800  | 0.29306400  | -2.25152800 | O           | -0.34229400 | 2.73988100  | 0.11400200  |
| H | 2.72082700  | 0.41085700  | -2.47232200 | O           | 0.82813200  | 2.08093600  | -1.67417300 |
| H | 4.15803600  | 1.25629800  | -1.86571200 | C           | 1.50200400  | -0.32170300 | -0.42060600 |

|             |             |             |             |               |             |             |             |
|-------------|-------------|-------------|-------------|---------------|-------------|-------------|-------------|
| H           | 1.44578300  | -1.32743100 | 0.01927600  | H             | -3.91282000 | -2.22046100 | 0.45797000  |
| H           | 1.64303000  | -0.47273400 | -1.50316800 | C             | -3.42025100 | 0.89396200  | -0.38876300 |
| C           | 2.72125700  | 0.42762100  | 0.07643300  | O             | -4.53139900 | 0.52818300  | -0.08854100 |
| O           | 2.64261500  | 1.56766200  | 0.47921500  | O             | -3.10659600 | 2.20040500  | -0.46502200 |
| C           | 4.04746600  | -0.27156400 | 0.02946800  | C             | -0.94240900 | 0.74469600  | -0.94750600 |
| C           | 4.19003600  | -1.59393400 | -0.40879800 | H             | -0.27323600 | 0.11300200  | -1.54592400 |
| C           | 5.17748100  | 0.44391400  | 0.44641100  | H             | -1.12431600 | 1.65099200  | -1.54585500 |
| C           | 5.44965900  | -2.19003100 | -0.42867200 | C             | -0.22324100 | 1.19174700  | 0.31592700  |
| H           | 3.32256000  | -2.16942800 | -0.73429300 | O             | -0.74705500 | 1.10760400  | 1.40214700  |
| C           | 6.43297800  | -0.15254300 | 0.42607500  | C             | 1.17391200  | 1.72839100  | 0.18009600  |
| H           | 5.04403100  | 1.47214800  | 0.78530500  | C             | 1.79703000  | 1.90062900  | -1.06101000 |
| C           | 6.56963700  | -1.47178800 | -0.01183200 | C             | 1.87910100  | 2.02440200  | 1.35371000  |
| H           | 5.55584700  | -3.22068000 | -0.77014600 | C             | 3.11298200  | 2.35751400  | -1.12607700 |
| H           | 7.30977700  | 0.40958900  | 0.75148500  | H             | 1.26237400  | 1.67630700  | -1.98523600 |
| H           | 7.55446000  | -1.94195700 | -0.02775600 | C             | 3.19388700  | 2.47308600  | 1.28802500  |
| C           | 0.97104400  | 3.44026500  | -2.06409400 | H             | 1.37243500  | 1.88657900  | 2.31026900  |
| H           | 1.52380300  | 3.43379400  | -3.00913000 | C             | 3.81335800  | 2.63773000  | 0.04628300  |
| H           | -0.01155300 | 3.91197000  | -2.20100400 | H             | 3.59417500  | 2.48867200  | -2.09665700 |
| H           | 1.53243300  | 3.99531700  | -1.29988500 | H             | 3.74041700  | 2.69980200  | 2.20518600  |
| O           | -0.66357000 | -2.44113600 | 0.08656300  | H             | 4.84520400  | 2.98990500  | -0.00649200 |
| <b>INT2</b> |             |             |             | C             | -4.13974000 | 3.10604900  | -0.11940200 |
| C           | 3.71261600  | -1.32619500 | -1.37575900 | H             | -3.71234900 | 4.11069300  | -0.20885000 |
| C           | 3.46657000  | -1.24935500 | -0.01454800 | H             | -4.99801200 | 2.99907500  | -0.79755600 |
| C           | 2.17296800  | -1.44388600 | 0.49757700  | H             | -4.48161500 | 2.93111800  | 0.91010200  |
| C           | 1.11187900  | -1.71278900 | -0.39472800 | O             | -1.58139500 | -2.23595900 | 1.87053400  |
| C           | 1.36397900  | -1.80102700 | -1.77305500 | H             | -1.47812300 | -3.12154400 | -0.65872900 |
| C           | 2.65370700  | -1.60679800 | -2.24891800 | <b>TS1-Sr</b> |             |             |             |
| H           | 4.71982500  | -1.17219800 | -1.76401300 | C             | 2.93902000  | -2.88727300 | 2.52492100  |
| H           | 4.27554500  | -1.03375100 | 0.68673900  | C             | 2.21773800  | -1.76743200 | 2.04986000  |
| H           | 0.54096300  | -2.02032600 | -2.45141300 | C             | 4.37631400  | -2.90560100 | 2.39602400  |
| H           | 2.83836400  | -1.67793100 | -3.32217900 | C             | 5.04564500  | -1.82324600 | 1.95575700  |
| C           | 1.88644700  | -1.36884500 | 1.91218000  | N             | 2.94632000  | -0.74014200 | 1.42181000  |
| H           | 2.70842200  | -1.13086100 | 2.59158700  | C             | 4.34853300  | -0.60184100 | 1.55801200  |
| C           | 0.64557000  | -1.59041400 | 2.38904400  | N             | 2.27731800  | 0.28652500  | 0.74739200  |
| H           | 0.40464700  | -1.55510000 | 3.45102500  | C             | 2.50357700  | 1.65639200  | 1.18992700  |
| N           | -0.17429100 | -1.85646000 | 0.12501100  | C             | 2.77745100  | 1.94211600  | 2.62510400  |
| C           | -0.47111100 | -1.92223400 | 1.50207000  | C             | 2.35850900  | 2.48653500  | 0.14438400  |
| N           | -1.22574600 | -2.13785400 | -0.73363600 | H             | 2.89331500  | 1.01261000  | 3.19599200  |
| C           | -2.36280200 | -1.30736000 | -0.67273000 | H             | 1.94964200  | 2.52332200  | 3.05320100  |
| C           | -3.64624000 | -2.07859600 | -0.59998000 | H             | 3.69020500  | 2.54302700  | 2.72018000  |
| C           | -2.24692400 | 0.04557100  | -0.69126800 | C             | 2.63077900  | 3.93088800  | 0.28905400  |
| H           | -4.47008600 | -1.56126100 | -1.09638500 | O             | 2.77054200  | 4.50938000  | 1.33935800  |
| H           | -3.50773100 | -3.07203000 | -1.05314900 | C             | 2.00632800  | 1.81314400  | -1.15439300 |

|   |             |             |             |   |             |             |             |
|---|-------------|-------------|-------------|---|-------------|-------------|-------------|
| H | 2.47108200  | 2.30131900  | -2.02042000 | H | -5.85682400 | 0.22637700  | -1.18825400 |
| H | 0.91686500  | 1.81963800  | -1.30891700 | C | -3.14173200 | -3.71114100 | -2.37525500 |
| C | 2.47743100  | 0.36000700  | -1.04792200 | H | -2.76621700 | -4.47825100 | -3.05588300 |
| O | 1.73846100  | -0.59879000 | -1.54536600 | H | -6.02832800 | -2.39926600 | 1.49987900  |
| C | 3.93749300  | 0.10836800  | -1.31591500 | H | -6.79302100 | -0.27300900 | 2.47342100  |
| C | 4.86349000  | 1.14403600  | -1.46358600 | C | -4.08010900 | -1.79976900 | -0.58605000 |
| C | 4.35702400  | -1.22114400 | -1.43077100 | C | -4.84664000 | -0.90092800 | 0.36721300  |
| C | 6.20348700  | 0.84952800  | -1.70028800 | C | -5.26311600 | -1.62931600 | 1.67468600  |
| H | 4.55100600  | 2.18521600  | -1.37472300 | C | -5.72336200 | -0.49993500 | 2.61431600  |
| C | 5.70117000  | -1.51267900 | -1.65017400 | C | -2.23172300 | -3.07541500 | -1.52273300 |
| H | 3.61522700  | -2.01672900 | -1.33900400 | C | -2.72151400 | -2.08712700 | -0.65106600 |
| C | 6.62629900  | -0.47677400 | -1.78316100 | C | -4.26227000 | 0.37481400  | 0.94492400  |
| H | 6.92381300  | 1.66100500  | -1.81268500 | C | -4.86795200 | 0.66654100  | 2.17217300  |
| H | 6.02661100  | -2.55208000 | -1.72462200 | H | -4.37304500 | -2.12185500 | 2.09654100  |
| H | 7.67927200  | -0.70287700 | -1.96051800 | O | -2.61875100 | 0.90529100  | -0.70532800 |
| H | 1.22206100  | 0.15291900  | 0.75763700  | H | -5.58330100 | -0.74307500 | 3.67710800  |
| H | 0.72770000  | -0.38437500 | -1.70283400 | C | -3.34492100 | 1.26893100  | 0.40738200  |
| O | 4.89571200  | 0.45490500  | 1.33887900  | C | 0.09959700  | -3.22847900 | -2.50675700 |
| O | 2.78468100  | 4.53012000  | -0.89652900 | C | -0.79865300 | -3.49136500 | -1.46106600 |
| C | 3.20048700  | 5.88872500  | -0.84674500 | C | -4.63470900 | 1.88672700  | 2.79988300  |
| H | 2.48713900  | 6.49628000  | -0.27426300 | O | -1.84635700 | -1.36903400 | 0.13999300  |
| H | 3.25311900  | 6.23561000  | -1.88364200 | C | -2.77757900 | 4.02756800  | -0.98038600 |
| H | 4.18776200  | 5.96773300  | -0.36996000 | C | -3.13480400 | 2.53141600  | 0.98347200  |
| H | 6.13261000  | -1.77236700 | 1.90075900  | H | -5.10964500 | 2.12198600  | 3.75435700  |
| H | 4.91442500  | -3.80306700 | 2.70993300  | C | -3.80066000 | 2.82147200  | 2.18108400  |
| C | 2.25496600  | -3.92172100 | 3.18544200  | C | 1.43271000  | -3.63862100 | -2.36768800 |
| H | 2.83156100  | -4.77952000 | 3.53780900  | H | -2.40489300 | 5.37264100  | -2.61493100 |
| C | 0.83603200  | -1.68958600 | 2.28201700  | C | -0.36984100 | -4.20155900 | -0.31856500 |
| H | 0.24099000  | -0.83611100 | 1.96233700  | H | 2.13748000  | -3.40948300 | -3.17196500 |
| C | 0.89261400  | -3.84135200 | 3.41407300  | C | -2.03938700 | 5.00545400  | -1.65207800 |
| C | 0.19644600  | -2.71314100 | 2.96741500  | C | -2.31361100 | 3.55028700  | 0.26318800  |
| H | -0.87275100 | -2.61579200 | 3.15958000  | H | -3.65437600 | 3.80396700  | 2.63505000  |
| H | 0.37192700  | -4.63846200 | 3.94596900  | C | 1.88681400  | -4.30691300 | -1.23282800 |
| P | -1.26132400 | 0.03621500  | -0.47493000 | C | 0.96414100  | -4.59124200 | -0.21896100 |
| O | -0.37476600 | 0.61502800  | 0.59719400  | C | -0.85906300 | 5.52924300  | -1.12490500 |
| O | -0.67702700 | -0.16482900 | -1.84844500 | C | -1.12140500 | 4.05995200  | 0.81208200  |
| H | -6.87015200 | -1.70216700 | -2.24807400 | H | 1.29082800  | -5.14004900 | 0.66935500  |
| H | -6.97845300 | -2.59050200 | -0.71894300 | C | -0.42089500 | 5.04760400  | 0.11140700  |
| H | -5.18202400 | -3.86217800 | -3.07807500 | H | 0.48916800  | 5.45641200  | 0.55906300  |
| C | -6.35833700 | -1.88120500 | -1.29211400 | C | -0.06290600 | 6.55727500  | -1.88345600 |
| C | -4.49810500 | -3.37877800 | -2.37782100 | H | 0.75554300  | 6.07524000  | -2.44188900 |
| H | -6.96086800 | -0.27198400 | 0.11667000  | H | -0.68954600 | 7.09148100  | -2.61068900 |
| C | -6.10529400 | -0.59206000 | -0.49509200 | H | 0.38454500  | 7.29869200  | -1.20608500 |
| C | -4.96107100 | -2.42620500 | -1.47623600 | C | -0.57567800 | 3.54158000  | 2.11698800  |

|               |             |             |             |   |             |             |             |
|---------------|-------------|-------------|-------------|---|-------------|-------------|-------------|
| H             | 0.42159300  | 3.96520000  | 2.30246700  | C | -5.54713900 | 2.87367400  | -0.50509500 |
| H             | -1.22085200 | 3.80589200  | 2.96825800  | H | -3.79568600 | 3.03001300  | 0.73523600  |
| H             | -0.50286900 | 2.44377000  | 2.07728400  | C | -5.31872200 | 1.56403100  | -2.52368000 |
| C             | -4.04673600 | 3.50490200  | -1.60254800 | H | -3.35612200 | 0.72039500  | -2.87519200 |
| H             | -3.89186200 | 2.49011300  | -2.00034000 | C | -6.10217100 | 2.34116100  | -1.66854800 |
| H             | -4.86553800 | 3.44987200  | -0.87053600 | H | -6.15303100 | 3.49658900  | 0.15486700  |
| H             | -4.36538800 | 4.14964800  | -2.43242300 | H | -5.74782400 | 1.15361300  | -3.43907100 |
| C             | 3.32926700  | -4.71591600 | -1.08156100 | H | -7.14701400 | 2.53962200  | -1.91402600 |
| H             | 3.41775500  | -5.79279700 | -0.87220000 | H | -1.12561500 | -0.54778500 | 0.05998400  |
| H             | 3.90481600  | -4.49942900 | -1.99260100 | H | -0.20661800 | 1.00835300  | -1.62181700 |
| H             | 3.80476700  | -4.18272800 | -0.24129700 | O | -0.88567400 | -1.76050600 | -1.50530100 |
| C             | -1.35470100 | -4.57480200 | 0.75830800  | O | -1.60577900 | 3.20523300  | 3.06939000  |
| H             | -1.76210900 | -3.68081300 | 1.25170000  | C | -1.53709300 | 3.85859800  | 4.32921500  |
| H             | -2.20874700 | -5.12400100 | 0.33275600  | H | -1.29214700 | 4.90583700  | 4.12299800  |
| H             | -0.87989700 | -5.20479100 | 1.52203400  | H | -2.49911700 | 3.79061000  | 4.85514000  |
| C             | -0.33909000 | -2.53294300 | -3.76912200 | H | -0.75803600 | 3.40310900  | 4.95577800  |
| H             | 0.52468700  | -2.08633900 | -4.28139100 | P | 1.46756500  | -0.09366200 | -0.25081100 |
| H             | -0.80888900 | -3.24367100 | -4.46844200 | O | 0.99806400  | 0.60599100  | -1.51271100 |
| H             | -1.05849300 | -1.73465300 | -3.55137200 | O | 0.48926900  | -0.40761200 | 0.83100600  |
|               |             |             |             | H | 6.76217300  | -1.65338400 | 2.59058400  |
|               |             |             |             | H | 7.25068700  | -2.32700900 | 1.02641900  |
|               |             |             |             | H | 5.16465000  | -4.01319000 | 2.80524700  |
|               |             |             |             | C | 6.46695000  | -1.74156700 | 1.53551900  |
|               |             |             |             | C | 4.57986800  | -3.48170500 | 2.05204800  |
|               |             |             |             | H | 7.17714400  | 0.07564200  | 0.47392400  |
|               |             |             |             | C | 6.25313700  | -0.38345600 | 0.85340900  |
|               |             |             |             | C | 5.11631800  | -2.39639200 | 1.36759100  |
|               |             |             |             | H | 5.79047200  | 0.31845700  | 1.56465900  |
|               |             |             |             | C | 3.27241700  | -3.87071100 | 1.77207400  |
|               |             |             |             | H | 2.83353200  | -4.72217800 | 2.29696000  |
|               |             |             |             | H | 6.75004700  | -1.95529500 | -1.26585500 |
|               |             |             |             | H | 7.52433400  | 0.31770400  | -1.81166600 |
|               |             |             |             | C | 4.36946600  | -1.72977400 | 0.38895900  |
|               |             |             |             | C | 5.23146200  | -0.67324000 | -0.28359900 |
|               |             |             |             | C | 5.97982800  | -1.21701100 | -1.53137700 |
|               |             |             |             | C | 6.53759300  | 0.04112100  | -2.21884500 |
|               |             |             |             | C | 2.47154700  | -3.18183100 | 0.84838200  |
|               |             |             |             | C | 3.04724100  | -2.10713300 | 0.15116600  |
|               |             |             |             | C | 4.67378200  | 0.62234700  | -0.84511600 |
|               |             |             |             | C | 5.50193600  | 1.08682600  | -1.87385000 |
|               |             |             |             | H | 5.24734500  | -1.70730600 | -2.19103000 |
|               |             |             |             | O | 2.65755900  | 0.82229000  | 0.41724000  |
|               |             |             |             | H | 6.65999600  | -0.08204200 | -3.30421300 |
|               |             |             |             | C | 3.56642500  | 1.37058200  | -0.46094800 |
| <b>TS1-Ss</b> |             |             |             |   |             |             |             |
| C             | -4.91466100 | -2.30634700 | -1.25378200 |   |             |             |             |
| C             | -4.26693500 | -1.34479900 | -0.44192400 |   |             |             |             |
| C             | -4.12960800 | -3.10109800 | -2.16485300 |   |             |             |             |
| C             | -2.79412000 | -2.94694700 | -2.25876400 |   |             |             |             |
| N             | -2.87571200 | -1.24965100 | -0.52521000 |   |             |             |             |
| C             | -2.07636600 | -1.97754800 | -1.44115500 |   |             |             |             |
| N             | -2.14018900 | -0.26387500 | 0.12985500  |   |             |             |             |
| C             | -2.33654400 | 0.05231900  | 1.51822800  |   |             |             |             |
| C             | -2.76166100 | -0.99765200 | 2.48917500  |   |             |             |             |
| C             | -1.94176200 | 1.31996600  | 1.74296100  |   |             |             |             |
| H             | -3.14640900 | -1.88231700 | 1.96815500  |   |             |             |             |
| H             | -1.88622900 | -1.29288100 | 3.08707800  |   |             |             |             |
| H             | -3.51530400 | -0.61236300 | 3.18653300  |   |             |             |             |
| C             | -1.92835100 | 1.90464400  | 3.10104000  |   |             |             |             |
| O             | -2.18880000 | 1.31878300  | 4.12159900  |   |             |             |             |
| C             | -1.41587800 | 2.07952300  | 0.55601300  |   |             |             |             |
| H             | -1.66420800 | 3.14557300  | 0.61364400  |   |             |             |             |
| H             | -0.31654400 | 2.01480400  | 0.51469800  |   |             |             |             |
| C             | -1.99795200 | 1.50059900  | -0.72491500 |   |             |             |             |
| O             | -1.28148800 | 1.31354600  | -1.76578300 |   |             |             |             |
| C             | -3.43217400 | 1.82125900  | -1.02832500 |   |             |             |             |
| C             | -4.21637000 | 2.61352100  | -0.18157800 |   |             |             |             |
| C             | -3.98584500 | 1.31511500  | -2.21109000 |   |             |             |             |

|   |             |             |             |               |             |             |             |
|---|-------------|-------------|-------------|---------------|-------------|-------------|-------------|
| C | 0.13239200  | -3.53519200 | 1.69913400  | C             | -2.88087700 | -5.38177900 | 0.25207100  |
| C | 1.06345700  | -3.64347000 | 0.64296300  | H             | -3.02269100 | -5.86066500 | -0.72655900 |
| C | 5.28339300  | 2.33567000  | -2.44551500 | H             | -3.03588500 | -6.14579900 | 1.02954000  |
| O | 2.30533300  | -1.39515800 | -0.76559200 | H             | -3.67333000 | -4.62641400 | 0.37779100  |
| C | 2.05141000  | 3.91720600  | 0.73146900  | C             | 1.64778700  | -4.34462900 | -1.71834700 |
| C | 3.32359400  | 2.63790000  | -1.01866000 | H             | 1.75985900  | -3.34174800 | -2.15877000 |
| H | 5.93018100  | 2.70516600  | -3.24359800 | H             | 2.64792900  | -4.68334600 | -1.40978400 |
| C | 4.21303900  | 3.10876700  | -1.99310500 | H             | 1.27470500  | -5.02531900 | -2.49544900 |
| C | -1.13901200 | -4.08919600 | 1.53808200  | C             | 0.47377700  | -2.80366400 | 2.97145700  |
| H | 0.89117400  | 5.05921900  | 2.13451200  | H             | -0.35209900 | -2.87192700 | 3.69311800  |
| C | 0.69747700  | -4.28106000 | -0.55402000 | H             | 1.37344900  | -3.20660300 | 3.45549000  |
| H | -1.85432600 | -4.01451300 | 2.36263700  | H             | 0.66762900  | -1.74488200 | 2.73960500  |
| C | 0.96134500  | 4.70755200  | 1.10115000  |               |             |             |             |
| C | 2.14539300  | 3.45465000  | -0.59994100 | <b>TS1-Rr</b> |             |             |             |
| H | 4.03582100  | 4.09549000  | -2.42604400 | C             | 4.66713600  | -1.87702600 | 2.32276500  |
| C | -1.51201200 | -4.76319900 | 0.36950400  | C             | 4.09347200  | -0.74280000 | 1.70031200  |
| C | -0.58035500 | -4.84349100 | -0.66359100 | C             | 3.81702900  | -2.96965800 | 2.72407300  |
| C | -0.04180100 | 5.05253900  | 0.19208300  | C             | 2.48651800  | -2.92980700 | 2.51989900  |
| C | 1.14509300  | 3.79111200  | -1.53315200 | N             | 2.71328500  | -0.75417100 | 1.45810000  |
| H | -0.84909400 | -5.36386600 | -1.58720700 | C             | 1.84850900  | -1.80222900 | 1.85234500  |
| C | 0.06673300  | 4.58177800  | -1.11557200 | N             | 2.05508200  | 0.24332100  | 0.72971200  |
| H | -0.71999800 | 4.81890400  | -1.83785900 | C             | 2.21762200  | 1.62574800  | 1.12393300  |
| H | -2.17588600 | -3.51674900 | -2.95088500 | C             | 2.36737800  | 1.93457600  | 2.57248200  |
| H | -4.64930400 | -3.83039900 | -2.79061900 | C             | 2.08145900  | 2.42546700  | 0.04874400  |
| C | -6.31265400 | -2.44704300 | -1.18325400 | H             | 2.60672800  | 2.99046600  | 2.72103600  |
| H | -6.78644000 | -3.19648500 | -1.82046300 | H             | 3.12860900  | 1.30394600  | 3.05009900  |
| C | -5.04662100 | -0.53864600 | 0.40725700  | H             | 1.40174200  | 1.71573000  | 3.05924300  |
| H | -4.59321200 | 0.23677700  | 1.01723500  | C             | 2.33555700  | 3.88633900  | 0.10608000  |
| C | -7.06990400 | -1.65662000 | -0.33904100 | O             | 2.47951900  | 4.54676900  | 1.10558900  |
| C | -6.42255900 | -0.69768900 | 0.45050900  | C             | 1.69410500  | 1.72017000  | -1.22526000 |
| H | -7.00339900 | -0.05233200 | 1.11169800  | H             | 2.08945300  | 2.21567300  | -2.12060800 |
| H | -8.15281900 | -1.77217900 | -0.29301100 | H             | 0.59705300  | 1.69874000  | -1.30664800 |
| C | -1.23306000 | 5.85522800  | 0.64489000  | C             | 2.19894000  | 0.28087200  | -1.16689600 |
| H | -1.95098600 | 6.00777000  | -0.17277400 | O             | 1.47583500  | -0.68792000 | -1.60769600 |
| H | -1.75306500 | 5.33747600  | 1.46773900  | C             | 3.66464700  | 0.06333300  | -1.42234800 |
| H | -0.93045700 | 6.84417100  | 1.02196800  | C             | 4.54279100  | 1.11857700  | -1.68795000 |
| C | 1.19803200  | 3.32073800  | -2.96453500 | C             | 4.13696800  | -1.25446200 | -1.43670000 |
| H | 0.19044800  | 3.32528900  | -3.40254300 | C             | 5.88894400  | 0.85708300  | -1.94064200 |
| H | 1.83073100  | 3.98046500  | -3.57942400 | H             | 4.18577200  | 2.15034700  | -1.69542800 |
| H | 1.60065700  | 2.30259700  | -3.03018200 | C             | 5.48454100  | -1.51054300 | -1.67065400 |
| C | 3.10517600  | 3.57792200  | 1.75315700  | H             | 3.42781500  | -2.06665600 | -1.26163700 |
| H | 3.05423000  | 2.51278200  | 2.02414000  | C             | 6.36279600  | -0.45415700 | -1.92154500 |
| H | 4.11654900  | 3.76906300  | 1.36506000  | H             | 6.56977700  | 1.68262000  | -2.15421600 |
| H | 2.96659000  | 4.17180400  | 2.66648900  | H             | 5.85146300  | -2.53845500 | -1.66486600 |

|   |             |             |             |   |             |             |             |
|---|-------------|-------------|-------------|---|-------------|-------------|-------------|
| H | 7.41851300  | -0.65548400 | -2.11183300 | O | -2.00501400 | -1.43858900 | 0.43220400  |
| H | 1.01124800  | 0.04466000  | 0.80438600  | H | -7.12529000 | -2.29166900 | -1.60206200 |
| H | 0.39072500  | -0.54442700 | -1.65958700 | C | -2.87205800 | -2.27020100 | -0.23823200 |
| O | 0.66289300  | -1.71833500 | 1.62380400  | C | -1.41058100 | 3.98001400  | 0.57883500  |
| O | 2.48147400  | 4.40188300  | -1.11965400 | C | -2.59242500 | 3.41057000  | 0.06449700  |
| C | 2.88156000  | 5.76596800  | -1.16878800 | C | -4.67580800 | -3.84992800 | -1.68293600 |
| H | 2.16911600  | 6.40157700  | -0.62692000 | O | -2.90244500 | 0.67796200  | -0.63012000 |
| H | 2.91440700  | 6.04187000  | -2.22741200 | C | -0.26637400 | -4.17302300 | -0.00818600 |
| H | 3.87453000  | 5.88745600  | -0.71307100 | C | -2.37861100 | -3.31132100 | -1.04321300 |
| H | 1.81084000  | -3.72330100 | 2.83558900  | H | -5.37027200 | -4.45501800 | -2.26898400 |
| H | 4.27937200  | -3.82785400 | 3.21689500  | C | -3.30440000 | -4.09575600 | -1.74449000 |
| C | 6.05220600  | -1.91242500 | 2.56520100  | C | -0.70139200 | 4.89212400  | -0.20979400 |
| H | 6.46827300  | -2.80309300 | 3.04014200  | H | 1.57358600  | -5.00136500 | 0.73757900  |
| C | 4.92510300  | 0.34486400  | 1.38370700  | C | -3.03561100 | 3.75201800  | -1.22923500 |
| H | 4.51961200  | 1.24278200  | 0.92863200  | H | 0.19561100  | 5.35536200  | 0.20994800  |
| C | 6.86686100  | -0.85069200 | 2.21999100  | C | 1.07409200  | -4.54725500 | -0.12282500 |
| C | 6.28666700  | 0.28180800  | 1.63520100  | C | -0.92071300 | -3.62819700 | -1.13137800 |
| H | 6.90677300  | 1.13871900  | 1.36671700  | H | -2.92632300 | -4.91167500 | -2.36426700 |
| H | 7.93962300  | -0.88795000 | 2.40952500  | C | -1.11633500 | 5.23542600  | -1.49910800 |
| P | -1.48666600 | -0.08127900 | -0.31737700 | C | -2.28563700 | 4.65410100  | -1.98887600 |
| O | -0.92841000 | -0.40908800 | -1.69021400 | C | 1.79188700  | -4.37001400 | -1.30890200 |
| O | -0.61950900 | 0.67851500  | 0.63499200  | C | -0.22354100 | -3.45504000 | -2.34097400 |
| H | -5.56926000 | -0.53878300 | 4.06371300  | H | -2.63300400 | 4.91555900  | -2.99211200 |
| H | -6.86987100 | -0.28877300 | 2.88971500  | C | 1.12747100  | -3.81477900 | -2.40194600 |
| H | -5.26016600 | 2.32852900  | 3.76508200  | H | 1.67437800  | -3.64811700 | -3.33408400 |
| C | -5.78237600 | -0.44021200 | 2.98985100  | C | 3.23646200  | -4.79179500 | -1.39871100 |
| C | -4.81856800 | 1.99838700  | 2.82267100  | H | 3.81003600  | -4.44570400 | -0.52447900 |
| H | -6.03552900 | -2.47644800 | 2.13490900  | H | 3.32551300  | -5.88944500 | -1.42722200 |
| C | -5.30677800 | -1.65391400 | 2.17119600  | H | 3.71304500  | -4.39681400 | -2.30696200 |
| C | -5.02047000 | 0.70284500  | 2.35726900  | C | -0.89795800 | -2.88450900 | -3.56194100 |
| H | -4.36888500 | -2.04547100 | 2.59496700  | H | -1.54402900 | -2.04029400 | -3.29018000 |
| C | -4.04433600 | 2.87896400  | 2.06401100  | H | -0.14790800 | -2.52874700 | -4.28216500 |
| H | -3.90895000 | 3.90979600  | 2.39767900  | H | -1.51560400 | -3.64111200 | -4.07128200 |
| H | -7.15922600 | -0.58310500 | 0.57030000  | C | -0.99356900 | -4.34680100 | 1.29791400  |
| H | -7.09639900 | -2.98696600 | 0.02646700  | H | -1.18133400 | -3.36022400 | 1.74835400  |
| C | -4.45981900 | 0.28974700  | 1.14277900  | H | -1.96113300 | -4.85170100 | 1.15861600  |
| C | -5.00251000 | -1.07521300 | 0.76234900  | H | -0.39524700 | -4.94187000 | 2.00259000  |
| C | -6.32306100 | -0.93647600 | -0.04991800 | C | -0.30849300 | 6.17653200  | -2.35238600 |
| C | -6.55012800 | -2.32504700 | -0.66604500 | H | 0.51264000  | 5.63630400  | -2.85092500 |
| C | -3.40963100 | 2.46854200  | 0.88509300  | H | -0.92691300 | 6.63430800  | -3.13673500 |
| C | -3.60396400 | 1.14523500  | 0.45869600  | H | 0.13691500  | 6.98319600  | -1.75314600 |
| C | -4.24210200 | -2.04852300 | -0.12110000 | C | -4.29754000 | 3.16792900  | -1.81005700 |
| C | -5.13769600 | -2.81883900 | -0.87175200 | H | -4.14813100 | 2.11024400  | -2.07420000 |
| H | -6.15998800 | -0.19987100 | -0.85207600 | H | -5.13129000 | 3.21374300  | -1.09436100 |



|               |             |             |             |   |             |             |             |
|---------------|-------------|-------------|-------------|---|-------------|-------------|-------------|
| H             | -4.59134500 | 3.70894900  | -2.71937500 | H | -2.38062000 | 4.39480200  | 4.57253100  |
| C             | -0.88949800 | 3.60454600  | 1.94223900  | H | -0.62474000 | 4.06796400  | 4.56289200  |
| H             | 0.14082600  | 3.96727300  | 2.07004300  | P | 1.32554400  | -0.07657900 | -0.19831100 |
| H             | -1.49825200 | 4.04061600  | 2.74899000  | O | 0.80547000  | 0.47239900  | -1.51624100 |
| H             | -0.90541900 | 2.51063600  | 2.05428900  | O | 0.34445100  | -0.35570000 | 0.89065500  |
| <b>TS1-Rs</b> |             |             |             | H | 6.64210400  | -1.30236700 | 2.74283400  |
| C             | -3.77299300 | -2.93367200 | -1.67244100 | H | 7.14359200  | -2.09535300 | 1.23974500  |
| C             | -2.84508800 | -2.01102300 | -1.13710500 | H | 5.08555200  | -3.66269900 | 3.15944200  |
| C             | -5.11500000 | -2.95131700 | -1.14886300 | C | 6.34914500  | -1.48424300 | 1.69931900  |
| C             | -5.50097500 | -2.06476000 | -0.20999000 | C | 4.49247900  | -3.20760000 | 2.36389800  |
| N             | -3.24995600 | -1.19367800 | -0.07294600 | H | 7.02374200  | 0.25335500  | 0.49033900  |
| C             | -4.58914600 | -1.05822600 | 0.33255500  | C | 6.10906400  | -0.19176500 | 0.90700700  |
| N             | -2.32838700 | -0.24029000 | 0.37594400  | C | 5.01112600  | -2.17598200 | 1.58885500  |
| C             | -2.44882600 | 0.29952700  | 1.71144900  | H | 5.63124800  | 0.55649700  | 1.55832500  |
| C             | -2.81556800 | -0.58153200 | 2.85876600  | C | 3.19072600  | -3.64002500 | 2.12152600  |
| C             | -2.01618200 | 1.57245900  | 1.74671800  | H | 2.76529900  | -4.44734600 | 2.72153900  |
| H             | -3.07891300 | -1.58548700 | 2.50360200  | H | 6.63341400  | -1.92757400 | -1.07795400 |
| H             | -1.96588000 | -0.64539800 | 3.55172700  | H | 7.36283200  | 0.30470000  | -1.81845200 |
| H             | -3.66434000 | -0.15719500 | 3.40837300  | C | 4.25298200  | -1.60751000 | 0.55827700  |
| C             | -1.91756400 | 2.32090600  | 3.01678000  | C | 5.09421200  | -0.59445100 | -0.20047500 |
| O             | -2.08703700 | 1.86972900  | 4.12126000  | C | 5.84899600  | -1.22832700 | -1.40112600 |
| C             | -1.55905900 | 2.19351800  | 0.45779000  | C | 6.38021700  | -0.02364100 | -2.19586300 |
| H             | -1.82960200 | 3.25614100  | 0.40725000  | C | 2.37944200  | -3.04605400 | 1.14319400  |
| H             | -0.46076700 | 2.15067300  | 0.36621000  | C | 2.93901400  | -2.02672500 | 0.35532000  |
| C             | -2.18094500 | 1.49336100  | -0.72830900 | C | 4.50980300  | 0.63860000  | -0.86665000 |
| O             | -1.48146400 | 1.20999300  | -1.75901700 | C | 5.32699000  | 1.02901900  | -1.93490600 |
| C             | -3.63440200 | 1.68496100  | -0.99671400 | H | 5.12320000  | -1.78684600 | -2.01229000 |
| C             | -4.43465100 | 2.49609800  | -0.18501500 | O | 2.48504800  | 0.91889900  | 0.38095700  |
| C             | -4.20491000 | 0.99984100  | -2.07734200 | H | 6.50094900  | -0.23501900 | -3.26767200 |
| C             | -5.79688900 | 2.60988200  | -0.44599800 | C | 3.39218000  | 1.40134400  | -0.54372000 |
| H             | -4.00259700 | 3.03041500  | 0.66220900  | C | 0.03965000  | -3.30392900 | 2.02349800  |
| C             | -5.57107700 | 1.10155200  | -2.32294000 | C | 0.97201700  | -3.52698200 | 0.98666600  |
| H             | -3.56557700 | 0.38157200  | -2.71064300 | C | 5.08814400  | 2.22221800  | -2.60835700 |
| C             | -6.36732000 | 1.90556300  | -1.50531900 | O | 2.18494500  | -1.40078500 | -0.61787900 |
| H             | -6.41856300 | 3.24163700  | 0.18977400  | C | 1.87140400  | 4.03898000  | 0.44169600  |
| H             | -6.01666500 | 0.55530200  | -3.15583300 | C | 3.13102400  | 2.61477900  | -1.20152700 |
| H             | -7.43859000 | 1.98607300  | -1.69781900 | H | 5.72640100  | 2.53264900  | -3.43783400 |
| H             | -1.35867500 | -0.63047300 | 0.36216100  | C | 4.01008700  | 3.01601500  | -2.21542200 |
| H             | -0.42220000 | 0.96700200  | -1.61091100 | C | -1.24049800 | -3.84707400 | 1.90497600  |
| O             | -4.93225500 | -0.18694800 | 1.10534100  | H | 0.73233900  | 5.31746200  | 1.73958200  |
| O             | -1.62407200 | 3.61337200  | 2.79882300  | C | 0.60384400  | -4.28109100 | -0.14057400 |
| C             | -1.47131600 | 4.41961100  | 3.95668800  | H | -1.95946200 | -3.68265700 | 2.71303800  |
| H             | -1.28422600 | 5.43937300  | 3.60285000  | C | 0.79190200  | 4.87091300  | 0.74291700  |
|               |             |             |             | C | 1.95258300  | 3.45893900  | -0.84378300 |

|   |             |             |             |   |            |             |             |
|---|-------------|-------------|-------------|---|------------|-------------|-------------|
| H | 3.81796300  | 3.96251100  | -2.72462000 | C | 2.71415800 | -3.06771100 | 2.49102000  |
| C | -1.62093600 | -4.62196700 | 0.80329900  | C | 2.57296700 | -1.74849500 | 2.01018900  |
| C | -0.68506200 | -4.82652800 | -0.20814100 | C | 3.90824100 | -3.80322300 | 2.14802100  |
| C | -0.21305000 | 5.14349800  | -0.18910200 | C | 4.90382800 | -3.23450000 | 1.43750100  |
| C | 0.94887900  | 3.71661500  | -1.79791200 | N | 3.59501500 | -1.20756900 | 1.22021900  |
| H | -0.96127500 | -5.42283800 | -1.08202900 | C | 4.83467500 | -1.84360100 | 0.98752600  |
| C | -0.11918100 | 4.55309300  | -1.44869900 | N | 3.43639600 | 0.05048500  | 0.70851600  |
| H | -0.90715700 | 4.73313900  | -2.18580400 | C | 4.09005700 | 1.15530400  | 1.22289400  |
| H | -6.51704800 | -2.01668900 | 0.18009600  | C | 4.73604800 | 1.05607900  | 2.55870400  |
| H | -5.82132600 | -3.68150200 | -1.55072500 | C | 4.00111700 | 2.19389500  | 0.35275200  |
| C | -3.38236600 | -3.77198400 | -2.73146400 | H | 4.03487900 | 0.62692200  | 3.29019100  |
| H | -4.11331900 | -4.48259700 | -3.12337100 | H | 5.06558500 | 2.04504300  | 2.88849300  |
| C | -1.56632200 | -1.92023200 | -1.70965700 | H | 5.60684500 | 0.38708900  | 2.48615100  |
| H | -0.83889600 | -1.18915500 | -1.37571800 | C | 4.52614300 | 3.53354200  | 0.58427400  |
| C | -2.11633100 | -3.68412900 | -3.28357000 | O | 5.06301600 | 3.95018100  | 1.58525800  |
| C | -1.21755800 | -2.74079700 | -2.77100500 | C | 3.27611200 | 1.75940100  | -0.89824200 |
| H | -0.22088000 | -2.63257600 | -3.20203300 | H | 3.88188100 | 1.89322900  | -1.80406700 |
| H | -1.82830700 | -4.32767300 | -4.11530800 | H | 2.33956100 | 2.31794900  | -1.04888800 |
| C | -1.39237900 | 5.99631300  | 0.19734700  | C | 2.90788800 | 0.27261300  | -0.64584700 |
| H | -1.06958800 | 6.98258400  | 0.56376900  | O | 1.50776700 | 0.10210100  | -0.54620700 |
| H | -2.07383200 | 6.15225900  | -0.64990600 | C | 3.48337400 | -0.73508700 | -1.63474000 |
| H | -1.95963800 | 5.51577800  | 1.01157400  | C | 4.72453800 | -0.51076900 | -2.23898700 |
| C | 0.99184000  | 3.11613500  | -3.18042000 | C | 2.81611500 | -1.94199100 | -1.87089300 |
| H | -0.01853400 | 3.07588800  | -3.61032700 | C | 5.27952300 | -1.46555400 | -3.08605600 |
| H | 1.61642000  | 3.71894200  | -3.85862100 | H | 5.28227300 | 0.40117000  | -2.02332400 |
| H | 1.40108500  | 2.09872700  | -3.15528900 | C | 3.37763900 | -2.89899300 | -2.71779000 |
| C | 2.92941700  | 3.78237600  | 1.48300900  | H | 1.85189500 | -2.14556600 | -1.39633700 |
| H | 2.86487200  | 2.74902000  | 1.85536600  | C | 4.60585700 | -2.66202600 | -3.33035100 |
| H | 3.93973400  | 3.91896300  | 1.06998900  | H | 6.24892900 | -1.27768800 | -3.55012100 |
| H | 2.80867300  | 4.46332500  | 2.33587700  | H | 2.84925100 | -3.83694500 | -2.89458300 |
| C | -3.00106800 | -5.22154800 | 0.74469400  | H | 5.04068800 | -3.41084700 | -3.99451300 |
| H | -3.18890900 | -5.70695600 | -0.22285600 | H | 0.25857800 | 0.68730200  | 0.34251200  |
| H | -3.13502000 | -5.97649800 | 1.53534600  | H | 1.07912300 | -0.12658300 | -1.39184700 |
| H | -3.77126100 | -4.44989900 | 0.89865200  | O | 5.74598700 | -1.24446400 | 0.46010700  |
| C | 0.39274400  | -2.48002000 | 3.23446600  | O | 4.34603900 | 4.31603400  | -0.50175200 |
| H | -0.46132400 | -2.42215300 | 3.92241300  | C | 4.81975000 | 5.64755800  | -0.38791200 |
| H | 1.24122500  | -2.90468300 | 3.78879900  | H | 4.25180200 | 6.20112600  | 0.37422600  |
| H | 0.67077600  | -1.46243400 | 2.92234700  | H | 4.68466800 | 6.11232200  | -1.37054100 |
| C | 1.58132200  | -4.51188600 | -1.26299000 | H | 5.88212500 | 5.66008900  | -0.10832000 |
| H | 1.85627700  | -3.55898100 | -1.74093700 | H | 5.82405800 | -3.76080000 | 1.18597800  |
| H | 2.51324900  | -4.96673400 | -0.89327000 | H | 3.99451800 | -4.83687000 | 2.49223000  |
| H | 1.15391200  | -5.17473700 | -2.02781100 | C | 1.70346500 | -3.61175400 | 3.30345800  |
|   |             |             |             | H | 1.82710800 | -4.63201800 | 3.67368100  |
|   |             |             |             | C | 1.44013900 | -0.99809900 | 2.35631600  |

INT3-Sr

|   |             |             |             |                |             |             |             |
|---|-------------|-------------|-------------|----------------|-------------|-------------|-------------|
| H | 1.34883500  | 0.02680800  | 2.00743900  | H              | 0.63923900  | -4.37027600 | -2.76483100 |
| C | 0.58016800  | -2.87261200 | 3.63340900  | C              | -0.58623800 | 4.69179300  | -2.17756700 |
| C | 0.45506000  | -1.56169800 | 3.15238700  | C              | -1.52489300 | 3.77708700  | -0.14322800 |
| H | -0.42314400 | -0.96497600 | 3.40478300  | H              | -2.81414900 | 4.80571800  | 2.02784900  |
| H | -0.19699200 | -3.30165200 | 4.26666300  | C              | 0.50427000  | -4.74804300 | -0.64468200 |
| P | -1.61801300 | 0.14244500  | -0.46935700 | C              | -0.30321500 | -4.59301300 | 0.48279700  |
| O | -0.68903600 | 0.75073800  | 0.64769900  | C              | 0.66541400  | 4.82731200  | -1.57715100 |
| O | -0.95089000 | -0.38126500 | -1.67748100 | C              | -0.27275600 | 3.92055700  | 0.49077600  |
| H | -7.48452900 | -0.49217300 | -2.02643500 | H              | 0.03544000  | -4.99149700 | 1.44235000  |
| H | -7.80008000 | -0.97813300 | -0.35245100 | C              | 0.80033900  | 4.43627400  | -0.24166500 |
| H | -6.42223300 | -3.15182000 | -2.27941900 | H              | 1.77860700  | 4.52781400  | 0.24084300  |
| C | -7.02600000 | -0.58504900 | -1.03205600 | C              | 1.84186300  | 5.38130600  | -2.33481500 |
| C | -5.62061500 | -2.70155500 | -1.69090300 | H              | 2.70075100  | 4.69676300  | -2.27509200 |
| H | -7.18523500 | 1.38505000  | -0.01672200 | H              | 1.59427100  | 5.54766200  | -3.39172400 |
| C | -6.44596400 | 0.74027700  | -0.51257600 | H              | 2.16298000  | 6.34386500  | -1.90632800 |
| C | -5.81404400 | -1.48782300 | -1.03872100 | C              | -0.06081500 | 3.53746300  | 1.93420200  |
| H | -6.00712200 | 1.30531700  | -1.34965900 | H              | 0.99932600  | 3.30912300  | 2.11758900  |
| C | -4.38190600 | -3.33586400 | -1.59246000 | H              | -0.33497200 | 4.36413700  | 2.60887600  |
| H | -4.22151300 | -4.29669400 | -2.08588800 | H              | -0.66215800 | 2.66359400  | 2.21396900  |
| H | -6.81561600 | -0.60620800 | 1.77793800  | C              | -3.01108600 | 4.04851100  | -2.19109900 |
| H | -7.01218200 | 1.79370800  | 2.30055700  | H              | -3.22755300 | 2.99755400  | -2.43578900 |
| C | -4.78710500 | -0.91934200 | -0.27531200 | H              | -3.83648000 | 4.41750900  | -1.56510200 |
| C | -5.29852300 | 0.31413800  | 0.44692900  | H              | -3.00621500 | 4.62061300  | -3.12826100 |
| C | -5.88151900 | -0.03082000 | 1.84626000  | C              | 1.85641200  | -5.40273200 | -0.54338700 |
| C | -6.04081000 | 1.33104100  | 2.54145100  | H              | 1.90735600  | -6.08063700 | 0.32067600  |
| C | -3.31315800 | -2.76024900 | -0.89266900 | H              | 2.09353000  | -5.98193500 | -1.44769800 |
| C | -3.54199500 | -1.53642400 | -0.24559500 | H              | 2.64847000  | -4.64546600 | -0.41885400 |
| C | -4.40758700 | 1.49011200  | 0.80784100  | C              | -2.38217600 | -3.81404900 | 1.66297700  |
| C | -4.90647900 | 2.13328700  | 1.94781400  | H              | -2.43438800 | -2.76508100 | 1.99334500  |
| H | -5.14402900 | -0.64096800 | 2.39067900  | H              | -3.41427200 | -4.15144300 | 1.48474900  |
| O | -2.69211800 | 1.28779300  | -0.85132400 | H              | -1.96218900 | -4.41166900 | 2.48288500  |
| H | -5.97797300 | 1.26438600  | 3.63665200  | C              | -1.63024400 | -3.03206700 | -3.29948500 |
| C | -3.28224500 | 2.00649900  | 0.17776900  | H              | -0.83043000 | -3.14401200 | -4.04398100 |
| C | -1.19401900 | -3.59017100 | -1.96996900 | H              | -2.52599100 | -3.53872400 | -3.68739400 |
| C | -1.98444500 | -3.43684600 | -0.81463300 | H              | -1.85928400 | -1.96202300 | -3.19896200 |
| C | -4.33916100 | 3.32198100  | 2.39458900  |                |             |             |             |
| O | -2.49152800 | -0.90181900 | 0.40236400  | <b>INT3-Ss</b> |             |             |             |
| C | -1.68446000 | 4.17198600  | -1.48678400 | C              | -5.10139100 | -2.15046900 | -1.33233400 |
| C | -2.69594800 | 3.21343400  | 0.59232600  | C              | -4.64786900 | -1.16066300 | -0.43366400 |
| H | -4.72961700 | 3.82587800  | 3.28078100  | C              | -4.13485900 | -2.80606700 | -2.18025400 |
| C | -3.25697000 | 3.86355200  | 1.69874100  | C              | -2.81853500 | -2.53016000 | -2.08372900 |
| C | 0.03391500  | -4.24867000 | -1.86241200 | N              | -3.28770300 | -0.83284000 | -0.42081100 |
| H | -0.71523500 | 4.99824800  | -3.21888200 | C              | -2.29985500 | -1.54585200 | -1.13279800 |
| C | -1.54012500 | -3.94529300 | 0.42070300  | N              | -2.89326400 | 0.28162400  | 0.27667500  |

|   |             |             |             |   |             |             |             |
|---|-------------|-------------|-------------|---|-------------|-------------|-------------|
| C | -2.04458200 | 0.20982000  | 1.36020400  | H | 6.60327500  | -0.14811000 | -3.43863100 |
| C | -1.87844800 | -1.08577400 | 2.06720800  | C | 4.16558500  | -2.02853200 | -0.35723800 |
| C | -1.52700100 | 1.44647900  | 1.61494000  | C | 4.87625400  | -1.01149700 | -1.23524000 |
| H | -2.85575400 | -1.57797000 | 2.18614200  | C | 5.07048900  | -1.52780800 | -2.68755700 |
| H | -1.23523000 | -1.73993900 | 1.45883800  | C | 5.50997500  | -0.28441300 | -3.47900100 |
| H | -1.41002100 | -0.94514300 | 3.04723800  | C | 2.37374900  | -3.35292800 | 0.62339300  |
| C | -0.63494500 | 1.76451700  | 2.69896400  | C | 2.80652100  | -2.25710400 | -0.14258400 |
| O | 0.12600300  | 0.96652600  | 3.25821900  | C | 4.33320200  | 0.37734800  | -1.50984000 |
| C | -2.02458900 | 2.44022300  | 0.59888400  | C | 4.80308700  | 0.83309300  | -2.74692200 |
| H | -2.71610100 | 3.17418000  | 1.03455500  | H | 4.09823700  | -1.88312800 | -3.06306300 |
| H | -1.19586400 | 2.99084600  | 0.13384800  | O | 2.94407000  | 0.67529700  | 0.40959400  |
| C | -2.69443800 | 1.56272500  | -0.48773600 | H | 5.22947700  | -0.33002400 | -4.54075300 |
| O | -1.87574900 | 1.34455500  | -1.57374000 | C | 3.54133200  | 1.20691400  | -0.72227100 |
| C | -4.04852300 | 2.03876900  | -0.99989300 | C | 0.45443300  | -3.74839800 | 2.18912300  |
| C | -4.96904600 | 2.67359500  | -0.16013500 | C | 0.93941000  | -3.69290900 | 0.86712400  |
| C | -4.42203700 | 1.74302700  | -2.31410500 | C | 4.56435300  | 2.14214000  | -3.15097800 |
| C | -6.23876600 | 3.00959800  | -0.62469900 | O | 1.88296400  | -1.36969500 | -0.67287800 |
| C | -5.69730800 | 2.06779100  | -2.77567400 | C | 2.86605300  | 3.84935300  | 0.99314000  |
| C | -6.60885100 | 2.70291000  | -1.93420200 | C | 3.28038100  | 2.53133400  | -1.10625200 |
| H | -6.94483000 | 3.50764200  | 0.04212200  | H | 4.93400200  | 2.50775600  | -4.11097300 |
| H | -5.97775100 | 1.82428300  | -3.80205100 | C | 3.82934500  | 2.98222600  | -2.31516100 |
| H | 0.71224500  | 0.03080900  | 2.28042200  | C | -0.84372900 | -4.21582400 | 2.41933500  |
| H | -0.98426900 | 1.06230000  | -1.25995200 | H | 2.44163500  | 5.09267300  | 2.69691300  |
| O | -1.12215300 | -1.33225500 | -0.94603500 | C | 0.11040700  | -4.08484400 | -0.20408200 |
| O | -0.66992000 | 3.03507900  | 3.07803900  | H | -1.21872000 | -4.24569900 | 3.44642100  |
| C | 0.20845800  | 3.40494900  | 4.13555400  | C | 2.09551600  | 4.77113000  | 1.71049500  |
| H | 0.14091800  | 4.49398400  | 4.22379200  | C | 2.43710600  | 3.44994300  | -0.28717900 |
| H | -0.11025500 | 2.93016300  | 5.07434100  | H | 3.63853900  | 4.01474100  | -2.61432800 |
| H | 1.23777700  | 3.09865700  | 3.91206100  | C | -1.67503300 | -4.62559400 | 1.37671900  |
| P | 1.49552100  | -0.03858800 | 0.15728200  | C | -1.17704200 | -4.55071700 | 0.07315300  |
| O | 0.59348200  | 0.86174400  | -0.58857400 | C | 0.90885600  | 5.29682700  | 1.19780000  |
| O | 1.12647300  | -0.58607600 | 1.56732900  | C | 1.23965600  | 3.96517200  | -0.82504800 |
| H | 7.15229200  | -2.39351200 | 0.87473100  | H | -1.80992400 | -4.87756300 | -0.75636300 |
| H | 6.99658900  | -2.97322800 | -0.79229400 | C | 0.50285600  | 4.88254600  | -0.07244600 |
| H | 5.44980000  | -4.60206700 | 1.49071400  | H | -0.42929700 | 5.27631900  | -0.48918100 |
| C | 6.51072200  | -2.35775300 | -0.01696500 | H | -2.06547500 | -3.02073000 | -2.69994500 |
| C | 4.71302900  | -3.94921300 | 1.01888800  | H | -4.49562400 | -3.54572300 | -2.89898200 |
| H | 7.04125500  | -0.53784500 | -1.17400200 | C | -6.47053900 | -2.46967100 | -1.36832500 |
| C | 6.25271200  | -0.93028700 | -0.51638100 | H | -6.80870900 | -3.23186900 | -2.07328300 |
| C | 5.11274700  | -2.85626400 | 0.25915000  | C | -5.56015600 | -0.53241900 | 0.42821600  |
| H | 6.15469800  | -0.24903700 | 0.34302400  | H | -5.20193700 | 0.22038800  | 1.12723200  |
| C | 3.35167500  | -4.19509900 | 1.17361800  | C | -7.37054600 | -1.83545800 | -0.53031900 |
| H | 3.01863400  | -5.05709000 | 1.75498800  | C | -6.90356900 | -0.86999700 | 0.37297600  |
| H | 5.78306100  | -2.36323900 | -2.74104200 | H | -7.60279000 | -0.37171000 | 1.04651100  |

|                |             |             |             |   |             |             |             |
|----------------|-------------|-------------|-------------|---|-------------|-------------|-------------|
| H              | -8.43088300 | -2.08665800 | -0.56699300 | O | 2.26465300  | 4.75163800  | 1.06418400  |
| C              | 0.05937200  | 6.25346800  | 1.99128600  | C | 1.85009600  | 1.77176300  | -1.22039100 |
| H              | -0.26332400 | 7.10546100  | 1.37524400  | H | 2.29416400  | 2.17575000  | -2.13719400 |
| H              | -0.85102200 | 5.74705700  | 2.35157100  | H | 0.76447500  | 1.67192500  | -1.38961600 |
| H              | 0.60028900  | 6.64910500  | 2.86220400  | C | 2.41828800  | 0.37931800  | -0.86900600 |
| C              | 0.72638300  | 3.54301300  | -2.17851500 | O | 1.69113100  | -0.70740600 | -1.27706700 |
| H              | -0.37020500 | 3.60803800  | -2.21041600 | C | 3.85809700  | 0.17058500  | -1.33781000 |
| H              | 1.12284400  | 4.18889400  | -2.97841000 | C | 4.71375800  | 1.24123400  | -1.61440500 |
| H              | 1.00756000  | 2.50691000  | -2.40250200 | C | 4.34502400  | -1.13715200 | -1.43966400 |
| C              | 4.13933500  | 3.31140500  | 1.59345100  | C | 6.04597500  | 1.00667700  | -1.95714800 |
| H              | 4.02943600  | 2.24707000  | 1.85197100  | H | 4.34893500  | 2.26851100  | -1.55252900 |
| H              | 4.98052000  | 3.38962900  | 0.88876300  | C | 5.67672900  | -1.37034100 | -1.77438700 |
| H              | 4.40296000  | 3.86173400  | 2.50676600  | H | 3.65784700  | -1.96348600 | -1.25137700 |
| H              | -7.60554200 | 2.96033000  | -2.29674100 | C | 6.53303600  | -0.29773000 | -2.02890800 |
| H              | -4.70770700 | 2.89455500  | 0.87672100  | H | 6.70448300  | 1.84972900  | -2.17401200 |
| H              | -3.70098600 | 1.25133400  | -2.96683700 | H | 6.04824800  | -2.39490100 | -1.84241800 |
| C              | -3.07951500 | -5.10609500 | 1.63172800  | H | 7.57600700  | -0.47944900 | -2.29454700 |
| H              | -3.26777300 | -6.06755500 | 1.13130100  | H | -0.09946100 | 0.02153600  | 1.10983500  |
| H              | -3.27079200 | -5.23604000 | 2.70543100  | H | 0.75725000  | -0.49671400 | -1.49952000 |
| H              | -3.81923600 | -4.38881300 | 1.24135500  | O | 0.60283500  | -1.11758800 | 1.75535800  |
| C              | 0.58668400  | -4.00906100 | -1.62925700 | O | 2.24564200  | 4.60022200  | -1.16519000 |
| H              | 0.57614500  | -2.96009800 | -1.96312100 | C | 2.54468800  | 5.98557700  | -1.20945000 |
| H              | 1.61363300  | -4.38855200 | -1.73638300 | H | 1.79563700  | 6.57439900  | -0.66318100 |
| H              | -0.06450000 | -4.59844900 | -2.28994700 | H | 2.55330500  | 6.27005700  | -2.26709300 |
| C              | 1.28936900  | -3.29231700 | 3.35967200  | H | 3.52968800  | 6.17983000  | -0.76029700 |
| H              | 0.64274300  | -3.00189500 | 4.19973100  | H | 1.42047800  | -3.29366500 | 2.85779500  |
| H              | 1.95785600  | -4.08850300 | 3.72288300  | H | 3.83130000  | -3.81191600 | 3.26030100  |
| H              | 1.91340600  | -2.43151500 | 3.08704500  | C | 5.91047000  | -2.16380500 | 2.66357700  |
|                |             |             |             | H | 6.19761600  | -3.09866900 | 3.14895000  |
|                |             |             |             | C | 5.11792800  | 0.23268100  | 1.46191100  |
|                |             |             |             | H | 4.82154900  | 1.17361500  | 1.00340800  |
|                |             |             |             | C | 6.85986200  | -1.21447600 | 2.33807700  |
|                |             |             |             | C | 6.45117400  | -0.00728700 | 1.74999500  |
|                |             |             |             | H | 7.18830800  | 0.76147300  | 1.51305000  |
|                |             |             |             | H | 7.91427700  | -1.39218600 | 2.55085000  |
|                |             |             |             | P | -1.56321800 | -0.12823400 | -0.46661700 |
|                |             |             |             | O | -0.92599300 | -0.33168400 | -1.78928400 |
|                |             |             |             | O | -0.74934500 | 0.65114400  | 0.61460300  |
|                |             |             |             | H | -5.50179100 | -0.85252600 | 4.05419100  |
|                |             |             |             | H | -6.82649800 | -0.63296600 | 2.90128000  |
|                |             |             |             | H | -5.31701800 | 2.01952300  | 3.83519600  |
|                |             |             |             | C | -5.73228000 | -0.73801100 | 2.98565300  |
|                |             |             |             | C | -4.87894300 | 1.74136200  | 2.87469200  |
|                |             |             |             | H | -5.90272600 | -2.76260300 | 2.08683500  |
| <b>INT3-Rr</b> |             |             |             |   |             |             |             |
| C              | 4.54676500  | -1.94362900 | 2.38766700  |   |             |             |             |
| C              | 4.15663500  | -0.74854200 | 1.74878600  |   |             |             |             |
| C              | 3.52705900  | -2.88571200 | 2.76706800  |   |             |             |             |
| C              | 2.22089800  | -2.62185000 | 2.55188200  |   |             |             |             |
| N              | 2.79818600  | -0.55900500 | 1.43448100  |   |             |             |             |
| C              | 1.79239100  | -1.40001900 | 1.89136400  |   |             |             |             |
| N              | 2.40238600  | 0.48475800  | 0.64400100  |   |             |             |             |
| C              | 2.32553900  | 1.79041900  | 1.08039300  |   |             |             |             |
| C              | 2.44901900  | 2.09604300  | 2.53323800  |   |             |             |             |
| C              | 2.09771900  | 2.60885800  | 0.01598200  |   |             |             |             |
| H              | 2.49323100  | 3.17824200  | 2.68346900  |   |             |             |             |
| H              | 3.33662700  | 1.61870800  | 2.97256800  |   |             |             |             |
| H              | 1.56390600  | 1.69712200  | 3.05494700  |   |             |             |             |
| C              | 2.18388900  | 4.06086300  | 0.06876000  |   |             |             |             |

|   |             |             |             |                |             |             |             |
|---|-------------|-------------|-------------|----------------|-------------|-------------|-------------|
| C | -5.21340200 | -1.90741700 | 2.13211800  | H              | 3.88937800  | -4.17592000 | -2.34929900 |
| C | -5.03144000 | 0.45289100  | 2.37266700  | C              | -0.80604700 | -2.92965200 | -3.63098400 |
| H | -4.25184200 | -2.26412500 | 2.53323500  | H              | -1.39836100 | -2.04042800 | -3.37637700 |
| C | -4.16251400 | 2.68201800  | 2.13165800  | H              | -0.07870700 | -2.65059700 | -4.40519100 |
| H | -4.06685800 | 3.70672400  | 2.49598100  | H              | -1.48564600 | -3.68045200 | -4.06248000 |
| H | -7.13751700 | -0.89078000 | 0.57123600  | C              | -0.78548000 | -4.23702200 | 1.27856000  |
| H | -6.97382500 | -3.28303600 | 0.00539600  | H              | -0.92225700 | -3.24714800 | 1.74413800  |
| C | -4.47471900 | 0.09873600  | 1.13656100  | H              | -1.77890300 | -4.69607200 | 1.17052000  |
| C | -4.95862000 | -1.28344600 | 0.73181500  | H              | -0.19418200 | -4.86579300 | 1.95931200  |
| C | -6.29403000 | -1.19869600 | -0.06277900 | C              | -0.66054900 | 6.19288000  | -2.34169600 |
| C | -6.46476700 | -2.59271400 | -0.68747500 | H              | 0.17461900  | 5.67936100  | -2.84426900 |
| C | -3.53770800 | 2.33996900  | 0.92672600  | H              | -1.30754600 | 6.61949100  | -3.12053000 |
| C | -3.67789400 | 1.02101600  | 0.47018900  | H              | -0.23857600 | 7.01933000  | -1.75317600 |
| C | -4.16699200 | -2.21091300 | -0.17276300 | C              | -4.54116500 | 3.06514300  | -1.71889300 |
| C | -5.03452500 | -3.02425400 | -0.91062000 | H              | -4.35908500 | 2.02812900  | -2.03948700 |
| H | -6.17630600 | -0.44801500 | -0.85972900 | H              | -5.34578700 | 3.04219200  | -0.96966300 |
| O | -1.95069000 | -1.48707400 | 0.32627800  | H              | -4.89624100 | 3.63037200  | -2.59076000 |
| H | -7.05021400 | -2.57789600 | -1.61734900 | C              | -1.04905200 | 3.59996200  | 1.95342600  |
| C | -2.79415700 | -2.37783700 | -0.31292900 | H              | 0.00835000  | 3.89662200  | 2.00735000  |
| C | -1.61338200 | 3.94327400  | 0.59863400  | H              | -1.58443000 | 4.12676500  | 2.75949500  |
| C | -2.78638300 | 3.33702100  | 0.10873000  | H              | -1.12941300 | 2.52193400  | 2.14597400  |
| C | -4.53215400 | -4.03936700 | -1.71902300 |                |             |             |             |
| O | -2.97060000 | 0.63133400  | -0.65635700 | <b>INT3-Rs</b> |             |             |             |
| C | -0.09009600 | -4.08598200 | -0.04947500 | C              | -4.29571200 | -2.79811600 | -2.21408600 |
| C | -2.25452100 | -3.39720800 | -1.10939600 | C              | -3.44276400 | -2.01374400 | -1.40799600 |
| H | -5.20479000 | -4.67885200 | -2.29381100 | C              | -5.70068100 | -2.84910200 | -1.88387500 |
| C | -3.15179000 | -4.22938000 | -1.79263600 | C              | -6.18929700 | -2.21799200 | -0.79725300 |
| C | -0.95425400 | 4.88319100  | -0.20036300 | N              | -3.99656000 | -1.30152800 | -0.33674800 |
| H | 1.79573100  | -4.78447100 | 0.71299800  | C              | -5.32753100 | -1.45520300 | 0.10912300  |
| C | -3.28156600 | 3.68167200  | -1.16575400 | N              | -3.18303100 | -0.50302200 | 0.41214800  |
| H | -0.05403400 | 5.35969600  | 0.19604600  | C              | -2.49815400 | -0.94435500 | 1.51262100  |
| C | 1.26768200  | -4.39592700 | -0.16206400 | C              | -2.69953700 | -2.34401600 | 1.97543700  |
| C | -0.78127200 | -3.63059700 | -1.19039200 | C              | -1.73297900 | 0.06520100  | 2.01650700  |
| H | -2.74565200 | -5.03563100 | -2.40689800 | H              | -2.46256100 | -3.05022300 | 1.16478800  |
| C | -1.41772400 | 5.22612200  | -1.47215000 | H              | -2.07045700 | -2.54725300 | 2.84622600  |
| C | -2.58590500 | 4.61824700  | -1.93289600 | H              | -3.76016500 | -2.47582500 | 2.24033800  |
| C | 1.96419900  | -4.23815800 | -1.36257200 | C              | -0.81832800 | -0.04193600 | 3.13836400  |
| C | -0.09784300 | -3.45235100 | -2.40804600 | O              | -0.52107200 | -1.05568400 | 3.74319600  |
| H | -2.97194000 | 4.88223600  | -2.92120200 | C              | -1.95053400 | 1.32431900  | 1.21508700  |
| C | 1.26770800  | -3.74759000 | -2.46692400 | H              | -2.39134300 | 2.12693300  | 1.82219700  |
| H | 1.80077100  | -3.58444300 | -3.40731500 | H              | -1.01697800 | 1.72801800  | 0.79520000  |
| C | 3.41985600  | -4.61633800 | -1.45864200 | C              | -2.90279800 | 0.91523500  | 0.05076000  |
| H | 3.98028400  | -4.28694900 | -0.57011600 | O              | -2.31712300 | 0.99052000  | -1.20090300 |
| H | 3.53647900  | -5.70978300 | -1.52815700 | C              | -4.20394900 | 1.70792000  | 0.01434700  |

|   |             |             |             |   |             |             |             |
|---|-------------|-------------|-------------|---|-------------|-------------|-------------|
| C | -4.92453400 | 1.91276900  | 1.19512300  | C | 2.29064300  | -3.42168300 | 0.45731000  |
| C | -4.69252400 | 2.23088500  | -1.18381300 | C | 3.91959200  | 3.52636900  | -2.75101900 |
| C | -6.10357700 | 2.65167500  | 1.18313900  | O | 2.54249700  | -0.91062600 | -0.78861900 |
| C | -5.87738400 | 2.97073200  | -1.19710000 | C | 0.75736500  | 4.08275000  | 0.79803500  |
| C | -6.58055100 | 3.18910000  | -0.01429800 | C | 2.16715300  | 3.17740800  | -1.08512800 |
| H | -6.65578600 | 2.80531500  | 2.11170300  | H | 4.30050100  | 4.07923200  | -3.61177400 |
| H | -6.24933300 | 3.37928800  | -2.13863500 | C | 2.71581400  | 3.89802000  | -2.15540100 |
| H | 0.60987600  | -1.26453100 | 1.52284200  | C | 0.27336700  | -4.26355600 | 1.49687700  |
| H | -1.36651300 | 0.78524500  | -1.12436800 | H | -0.54177400 | 4.92081700  | 2.28983900  |
| O | -5.68845900 | -0.98798500 | 1.16635400  | C | 1.84092100  | -3.91237600 | -0.78855300 |
| O | -0.26506300 | 1.14542900  | 3.42953800  | H | -0.33621400 | -4.39483700 | 2.39497800  |
| C | 0.75628800  | 1.12997100  | 4.41005000  | C | -0.47625400 | 4.53821100  | 1.26727200  |
| H | 1.07770200  | 2.16948200  | 4.53782000  | C | 0.84426700  | 3.57938500  | -0.51803000 |
| H | 0.38233900  | 0.73021800  | 5.36276500  | H | 2.16068300  | 4.75724700  | -2.53649700 |
| H | 1.60140100  | 0.51204800  | 4.07330900  | C | -0.19863100 | -4.73759600 | 0.27251500  |
| P | 1.49776800  | 0.02768700  | 0.00230600  | C | 0.61308700  | -4.57064800 | -0.85366700 |
| O | 0.30539500  | 0.24772300  | -0.83853900 | C | -1.62668400 | 4.51155300  | 0.47151600  |
| O | 1.30523400  | -0.58535700 | 1.44655400  | C | -0.30493400 | 3.52217500  | -1.32870400 |
| H | 7.29104600  | 0.17801500  | 1.89538200  | H | 0.26840400  | -4.95657200 | -1.81709700 |
| H | 7.77391300  | -0.22823700 | 0.24165800  | C | -1.51915000 | 3.99464400  | -0.81812800 |
| H | 6.62324200  | -2.60889200 | 2.06370800  | H | -2.41356800 | 3.92847100  | -1.44188100 |
| C | 6.91062100  | 0.03633200  | 0.87419400  | H | -7.23981700 | -2.26474800 | -0.51161300 |
| C | 5.79692200  | -2.27266600 | 1.43467200  | H | -6.36181800 | -3.43186800 | -2.52988300 |
| H | 6.83877200  | 2.02288200  | -0.11757400 | C | -3.75188900 | -3.51423800 | -3.29575200 |
| C | 6.17373700  | 1.27128700  | 0.33032200  | H | -4.42410000 | -4.11221500 | -3.91463900 |
| C | 5.84726800  | -1.03459400 | 0.80209900  | C | -2.06420300 | -1.98499000 | -1.67266000 |
| H | 5.61028400  | 1.75541400  | 1.14301000  | H | -1.39451600 | -1.39097500 | -1.05385200 |
| C | 4.66429300  | -3.07346700 | 1.27825800  | C | -2.39589400 | -3.46499500 | -3.57065300 |
| H | 4.60679100  | -4.04226100 | 1.77820700  | C | -1.55777600 | -2.69788000 | -2.74846400 |
| H | 6.87528900  | -0.00617500 | -1.91628800 | H | -0.48587700 | -2.64866500 | -2.94751500 |
| H | 6.77076600  | 2.40311900  | -2.44023900 | H | -1.98336800 | -4.01668100 | -4.41603400 |
| C | 4.79069700  | -0.60637100 | -0.01255400 | C | -2.94733100 | 5.00151800  | 1.00476500  |
| C | 5.16062700  | 0.69601000  | -0.69914500 | H | -3.13800000 | 4.60747600  | 2.01455900  |
| C | 5.87888300  | 0.43681500  | -2.05334500 | H | -2.95907000 | 6.10075400  | 1.07780400  |
| C | 5.89535400  | 1.80692000  | -2.74632500 | H | -3.77989700 | 4.69449100  | 0.35514900  |
| C | 3.56133600  | -2.64132400 | 0.53215800  | C | 1.96853100  | 4.14021800  | 1.69286600  |
| C | 3.65240500  | -1.39533500 | -0.10743200 | H | 2.28345200  | 3.12884900  | 1.99121000  |
| C | 4.13594700  | 1.73399100  | -1.13065700 | H | 2.82217000  | 4.61415400  | 1.18556200  |
| C | 4.61806700  | 2.43611200  | -2.24306800 | H | 1.75001300  | 4.71249800  | 2.60429200  |
| H | 5.26959500  | -0.26702300 | -2.64128900 | C | -0.26718800 | 2.92954500  | -2.71456000 |
| O | 2.36077300  | 1.31245400  | 0.42853000  | H | -1.28385600 | 2.68214600  | -3.04640700 |
| H | 5.92095300  | 1.73414400  | -3.84244800 | H | 0.17008400  | 3.62451100  | -3.44799900 |
| C | 2.90187000  | 2.08919400  | -0.59320500 | H | 0.33395600  | 2.00909200  | -2.73012300 |
| C | 1.51526400  | -3.62218500 | 1.61639800  | C | 2.65653800  | -3.73060400 | -2.04202200 |

|               |             |             |             |   |             |             |             |
|---------------|-------------|-------------|-------------|---|-------------|-------------|-------------|
| H             | 2.58989700  | -2.69326700 | -2.40489800 | O | -5.20222000 | 1.12885800  | 1.75220300  |
| H             | 3.72003100  | -3.94778800 | -1.86710100 | H | -0.87893200 | -0.51574400 | -0.63192200 |
| H             | 2.29497800  | -4.39364900 | -2.83933900 | C | -0.42671200 | 0.45033400  | 3.29355400  |
| C             | -1.54565400 | -5.39586100 | 0.13911800  | O | 0.38150800  | 1.49324400  | 3.10580700  |
| H             | -2.03567600 | -5.51717100 | 1.11462100  | O | -0.31406000 | -0.34564100 | 4.18867200  |
| H             | -2.20516000 | -4.79522100 | -0.51005200 | C | 1.58687700  | 1.46860100  | 3.85470300  |
| H             | -1.45517800 | -6.38939100 | -0.32503900 | H | 1.37983400  | 1.38104100  | 4.92993300  |
| C             | 1.96390400  | -3.15982500 | 2.98223300  | H | 2.10089000  | 2.41146500  | 3.64132600  |
| H             | 1.09759300  | -2.88236000 | 3.59830700  | H | 2.19461900  | 0.61241000  | 3.52712300  |
| H             | 2.50876100  | -3.96303200 | 3.50403600  | C | -1.60461500 | 2.72298900  | 1.19607100  |
| H             | 2.62960100  | -2.28977900 | 2.92395800  | H | -2.49221100 | 3.34105600  | 0.99593800  |
| H             | -7.50293600 | 3.77264600  | -0.02370700 | H | -0.93718300 | 2.74709500  | 0.31911300  |
| H             | -4.13269500 | 2.05956700  | -2.10274600 | H | -1.04795000 | 3.12813100  | 2.04659500  |
| H             | -4.56830600 | 1.47171100  | 2.12864000  | C | -4.50856100 | 2.83665500  | -3.42188400 |
|               |             |             |             | C | -2.40026500 | 1.63803500  | -2.01762200 |
|               |             |             |             | C | -3.28159600 | 2.66232200  | -4.03997600 |
| <b>TS2-Sr</b> |             |             |             | H | -3.13038500 | 2.99338400  | -5.06762200 |
| C             | -4.71509000 | 2.40832000  | -2.09967900 | C | -2.23222800 | 2.06644400  | -3.32827800 |
| C             | -3.65107000 | 1.79406000  | -1.40565500 | H | -1.25534900 | 1.93869300  | -3.79771900 |
| C             | -5.97821300 | 2.58659200  | -1.42253400 | H | -5.33729600 | 3.31183600  | -3.95059800 |
| H             | -6.79204400 | 3.06575400  | -1.97185800 | H | -1.55822600 | 1.20664900  | -1.47527800 |
| C             | -6.16390800 | 2.18827100  | -0.14726800 | H | -1.55822600 | 1.20664900  | -1.47527800 |
| H             | -7.10761900 | 2.32034300  | 0.38047200  | P | 1.31425700  | -0.22855700 | 0.26710000  |
| N             | -3.89346400 | 1.35911700  | -0.09758500 | O | 0.96394200  | -0.88549400 | 1.55428900  |
| C             | -5.10531300 | 1.53150800  | 0.61548800  | O | 0.29722700  | 0.55886000  | -0.52841900 |
| N             | -2.92800600 | 0.67409700  | 0.59179100  | H | 5.73641300  | -0.20590200 | -4.07490100 |
| C             | -1.96815300 | 1.31087100  | 1.44866600  | H | 6.89103300  | -0.01528200 | -2.74546600 |
| C             | -1.49847200 | 0.37069900  | 2.28225700  | H | 5.27310900  | 2.58486800  | -3.63078400 |
| C             | -2.16298500 | -0.94084400 | 2.00757900  | C | 5.82761000  | -0.19016200 | -2.97957000 |
| C             | -2.96746700 | -0.65578800 | 0.77913700  | C | 4.76525800  | 2.18867900  | -2.74932400 |
| O             | -1.62768400 | -1.19897100 | -0.63113600 | H | 6.05236300  | -2.28362100 | -2.27164900 |
| C             | -4.12328000 | -1.44756600 | 0.29645100  | C | 5.31120900  | -1.47278700 | -2.31355900 |
| C             | -4.43197900 | -1.50879900 | -1.06911100 | C | 4.96343000  | 0.87315800  | -2.34399100 |
| C             | -4.98089000 | -2.03690100 | 1.23260200  | H | 4.42991400  | -1.84430900 | -2.85956100 |
| C             | -5.59249100 | -2.15173600 | -1.48821700 | C | 3.91569400  | 2.99997600  | -2.00004800 |
| H             | -3.74415700 | -1.06957600 | -1.79208900 | H | 3.77828600  | 4.04811700  | -2.27487400 |
| C             | -6.14384900 | -2.67518000 | 0.80432000  | H | 6.96344600  | -0.54485700 | -0.40579500 |
| H             | -4.76512300 | -1.97047800 | 2.29891700  | H | 6.91861800  | -2.99613900 | -0.19834300 |
| C             | -6.45195800 | -2.73163400 | -0.55336700 | C | 4.31874200  | 0.36565400  | -1.20864200 |
| H             | -5.82470800 | -2.20199500 | -2.55298500 | C | 4.85302200  | -1.02362700 | -0.89680200 |
| H             | -6.81329800 | -3.12332800 | 1.53965000  | C | 6.07336100  | -0.98616300 | 0.06542300  |
| H             | -7.36335900 | -3.23163400 | -0.88545800 | C | 6.26448700  | -2.45052200 | 0.50189900  |
| H             | -1.21823500 | -2.06902200 | -0.48593800 | C | 3.21656900  | 2.50787000  | -0.88936100 |
| H             | -2.84595100 | -1.22779000 | 2.82550000  | C | 3.39970100  | 1.16349300  | -0.52476600 |
| H             | -1.43363400 | -1.75005700 | 1.86723100  | C | 4.02498900  | -2.10749200 | -0.23870000 |



|   |             |             |             |               |             |             |             |
|---|-------------|-------------|-------------|---------------|-------------|-------------|-------------|
| C | 4.85478100  | -2.99604500 | 0.45281900  | H             | 3.92875600  | 2.14429100  | 1.97129000  |
| H | 5.80802300  | -0.37013600 | 0.93877500  | H             | 4.91999500  | 3.34378300  | 1.12669900  |
| O | 1.84009800  | -1.36997200 | -0.81937600 | H             | 4.30212400  | 3.70144300  | 2.75985000  |
| H | 6.71400100  | -2.54413200 | 1.50072700  | C             | 0.69909400  | 3.57422000  | -1.97618000 |
| C | 2.65824100  | -2.34359900 | -0.30686700 | H             | -0.30606700 | 3.98166000  | -2.15505700 |
| C | 1.22129600  | 4.02158200  | -0.63554400 | H             | 1.34715900  | 3.90079800  | -2.80368200 |
| C | 2.37669100  | 3.44377800  | -0.08432200 | H             | 0.65098000  | 2.47460500  | -2.00332700 |
| C | 4.33369300  | -4.16995300 | 0.98802900  |               |             |             |             |
| O | 2.68665300  | 0.63918000  | 0.52584700  | <b>TS2-Ss</b> |             |             |             |
| C | 0.16683600  | -4.02747200 | -1.30317000 | C             | 7.04156600  | -0.63843500 | -0.63585600 |
| C | 2.11122300  | -3.53591700 | 0.19561300  | C             | 5.77175200  | -0.06346700 | -0.84564900 |
| H | 4.97318200  | -4.87213200 | 1.52629600  | C             | 7.12141700  | -1.90507100 | 0.05375600  |
| C | 2.97359000  | -4.44312700 | 0.82403400  | H             | 8.11018100  | -2.33629900 | 0.22610600  |
| C | 0.52614900  | 4.98765600  | 0.10146500  | C             | 6.01482300  | -2.55515200 | 0.46909200  |
| H | -1.55494500 | -4.51366600 | -2.49905800 | H             | 6.05220000  | -3.51813200 | 0.97695500  |
| C | 2.81293200  | 3.82487600  | 1.20164000  | N             | 4.64869700  | -0.74245700 | -0.34718900 |
| H | -0.37814300 | 5.42789000  | -0.32872900 | C             | 4.67640300  | -2.01979200 | 0.23930400  |
| C | -1.17799000 | -4.37259200 | -1.48280400 | N             | 3.41999400  | -0.18089700 | -0.58740700 |
| C | 0.66324200  | -3.84794600 | 0.00638200  | C             | 2.67926400  | -0.47473300 | -1.78495100 |
| H | 2.55873200  | -5.37716700 | 1.20903800  | C             | 1.56421000  | 0.27336400  | -1.75040500 |
| C | 0.93619600  | 5.37906000  | 1.37501300  | C             | 1.58107700  | 1.13304200  | -0.52609500 |
| C | 2.08161800  | 4.78012600  | 1.91007500  | C             | 2.67750800  | 0.52955800  | 0.27778700  |
| C | -2.04652700 | -4.54388500 | -0.40336800 | O             | 1.40006500  | -1.02517800 | 0.97816000  |
| C | -0.19942800 | -4.00399100 | 1.11291500  | C             | 3.08401400  | 1.04485300  | 1.59135800  |
| H | 2.42251300  | 5.07644700  | 2.90680600  | C             | 2.04225300  | 1.35841100  | 2.48393600  |
| C | -1.53991700 | -4.33850200 | 0.88429600  | C             | 4.41812000  | 1.27999500  | 1.95388300  |
| H | -2.20830400 | -4.44940500 | 1.74365100  | C             | 2.35008300  | 1.89374900  | 3.72996700  |
| C | -3.47279900 | -4.97280600 | -0.61560600 | H             | 1.00310500  | 1.14244200  | 2.20913100  |
| H | -4.15426800 | -4.45996400 | 0.07760500  | C             | 4.70840500  | 1.82835000  | 3.20068200  |
| H | -3.80345400 | -4.76784500 | -1.64282600 | H             | 5.23695600  | 1.07067200  | 1.26801100  |
| H | -3.57894900 | -6.05545500 | -0.44017800 | C             | 3.67799900  | 2.13164900  | 4.08908800  |
| C | 0.28763900  | -3.78478400 | 2.52170200  | H             | 1.54318300  | 2.11924900  | 4.42833200  |
| H | 0.96620800  | -4.58843600 | 2.84435400  | H             | 5.74661000  | 2.02020700  | 3.47439800  |
| H | 0.82863900  | -2.83010800 | 2.58670300  | H             | 3.91024400  | 2.55495700  | 5.06793900  |
| H | -0.55668200 | -3.76234900 | 3.22486000  | H             | 1.89576800  | -1.85390800 | 0.87997200  |
| C | 1.05255500  | -3.85261400 | -2.50864500 | H             | 1.90410000  | 2.16471700  | -0.77618200 |
| H | 1.28809900  | -2.78847400 | -2.66132100 | H             | 0.63665300  | 1.23879200  | 0.02686500  |
| H | 2.00719700  | -4.38424600 | -2.38502100 | O             | 3.64426200  | -2.59721800 | 0.51666000  |
| H | 0.55705900  | -4.22952400 | -3.41303400 | H             | 0.59475400  | -1.09339700 | 0.39256100  |
| C | 0.16395000  | 6.39876200  | 2.17049300  | C             | 0.41898900  | 0.32162500  | -2.68667300 |
| H | -0.20557700 | 5.96629700  | 3.11320800  | O             | 0.22262500  | -0.82581400 | -3.33329000 |
| H | 0.79620900  | 7.25984600  | 2.43532300  | O             | -0.25545900 | 1.30418600  | -2.83609700 |
| H | -0.70155900 | 6.77313100  | 1.60735600  | C             | -1.02301600 | -0.92290900 | -4.01410600 |
| C | 4.05823600  | 3.22402600  | 1.80084800  | H             | -1.09138500 | -0.17720500 | -4.81822900 |

|   |             |             |             |   |             |             |             |
|---|-------------|-------------|-------------|---|-------------|-------------|-------------|
| H | -1.07053000 | -1.93543800 | -4.42833100 | C | -1.39993000 | 3.78745300  | -1.18661200 |
| H | -1.84205600 | -0.76280800 | -3.29738700 | H | 0.94836700  | 4.56532100  | 1.81055500  |
| C | 3.21718100  | -1.48113700 | -2.73504900 | C | -0.45261500 | -4.09054500 | 2.67167600  |
| H | 4.21698300  | -1.19334100 | -3.09506400 | C | -1.66478100 | -3.55919700 | 0.64418200  |
| H | 3.29427000  | -2.46307500 | -2.24313900 | H | -3.16984800 | -4.92627400 | -1.15306600 |
| H | 2.53678400  | -1.56936000 | -3.58772400 | C | 0.75688900  | 4.55309700  | -0.33718600 |
| P | -1.64498300 | 0.00750400  | 0.38869500  | C | -0.10192800 | 4.26871400  | -1.39759200 |
| O | -0.76391000 | -0.80172800 | -0.52841200 | C | 0.71247300  | -4.34536400 | 1.95013500  |
| O | -1.06775500 | 0.82672700  | 1.48862100  | C | -0.50024800 | -3.82596700 | -0.10776800 |
| H | -7.41006800 | 1.24895500  | 2.11666300  | H | 0.24455600  | 4.40744100  | -2.42525100 |
| H | -7.80511300 | 1.42880600  | 0.39984500  | C | 0.66530600  | -4.21009100 | 0.55876300  |
| H | -6.20996900 | 3.84182400  | 1.81543400  | H | 1.57446700  | -4.38971600 | -0.02282000 |
| C | -7.00822900 | 1.12834400  | 1.10057400  | C | 1.98587800  | -4.76723800 | 2.63446500  |
| C | -5.46891900 | 3.24634900  | 1.27851900  | H | 2.14884400  | -5.85183000 | 2.52813700  |
| H | -7.31702900 | -0.98662800 | 0.49024800  | H | 2.85112400  | -4.25638000 | 2.18861800  |
| C | -6.52036600 | -0.30104700 | 0.81328700  | H | 1.95686300  | -4.53754200 | 3.70835400  |
| C | -5.75839800 | 1.94727200  | 0.87289200  | C | -0.47398800 | -3.64939700 | -1.60413800 |
| H | -6.05460700 | -0.72089600 | 1.71824100  | H | -1.01858800 | -4.45186000 | -2.12491600 |
| C | -4.20725500 | 3.77548700  | 1.00264800  | H | -0.92603200 | -2.68489300 | -1.86813000 |
| H | -3.96920900 | 4.79703700  | 1.30678600  | H | 0.56219000  | -3.65502000 | -1.97143000 |
| H | -6.97393700 | 0.60548800  | -1.66971700 | C | -2.86477400 | -3.42687000 | 2.87990200  |
| H | -7.30188000 | -1.83883800 | -1.71218700 | H | -3.04942800 | -2.34434900 | 2.94743500  |
| C | -4.80920600 | 1.19229000  | 0.17489600  | H | -3.76258600 | -3.88626200 | 2.44112400  |
| C | -5.41682500 | -0.12825800 | -0.26890900 | H | -2.73685300 | -3.81931500 | 3.89769800  |
| C | -6.07131000 | -0.02249200 | -1.67496400 | C | 2.15813200  | 5.05683200  | -0.57500800 |
| C | -6.33022100 | -1.47985400 | -2.09075100 | H | 2.47378200  | 4.88680300  | -1.61438900 |
| C | -3.21341800 | 3.02065400  | 0.36612400  | H | 2.23180100  | 6.13869400  | -0.38078600 |
| C | -3.53555900 | 1.71286200  | -0.04231400 | H | 2.87928800  | 4.56207200  | 0.09446400  |
| C | -4.59977200 | -1.39796900 | -0.44821200 | C | -2.29459500 | 3.49612500  | -2.36091700 |
| C | -5.18962800 | -2.21289300 | -1.42196300 | H | -2.45158100 | 2.41274200  | -2.45446700 |
| H | -5.34221400 | 0.43400800  | -2.36270000 | H | -3.27664300 | 3.97785400  | -2.23960700 |
| O | -2.79866200 | -0.96988500 | 1.05421600  | H | -1.84032200 | 3.85226600  | -3.29495000 |
| H | -6.33748500 | -1.62126200 | -3.18096000 | C | -1.44676800 | 3.64754100  | 2.63970100  |
| C | -3.44697300 | -1.82846100 | 0.20542800  | H | -0.59731900 | 3.74681000  | 3.32980600  |
| C | -1.00048800 | 3.87580900  | 1.21991700  | H | -2.21364400 | 4.37324200  | 2.95051900  |
| C | -1.84677300 | 3.57850000  | 0.13020700  | H | -1.86454500 | 2.63692400  | 2.73892300  |
| C | -4.68906800 | -3.48606800 | -1.67704900 | C | 8.17995000  | 0.03683200  | -1.10848300 |
| O | -2.58352300 | 0.91671100  | -0.62365900 | C | 5.64903900  | 1.16338600  | -1.51288600 |
| C | -1.64110500 | -3.69946300 | 2.04458800  | C | 8.06235700  | 1.24739800  | -1.77059600 |
| C | -2.91237400 | -3.10688000 | -0.04297400 | H | 8.95067600  | 1.76453900  | -2.13356400 |
| H | -5.15397000 | -4.12945300 | -2.42682400 | C | 6.79265100  | 1.80445600  | -1.97011100 |
| C | -3.56962500 | -3.92678500 | -0.96924100 | H | 6.69119000  | 2.75836400  | -2.48945000 |
| C | 0.28651400  | 4.35391100  | 0.96526400  | H | 9.15991500  | -0.41514100 | -0.94328400 |
| H | -0.44030000 | -4.18999400 | 3.76047000  | H | 4.66848300  | 1.61265900  | -1.67023600 |

|               |             |             |             |   |             |             |             |
|---------------|-------------|-------------|-------------|---|-------------|-------------|-------------|
|               |             |             |             | C | 5.62530200  | -0.58809400 | 1.39616700  |
|               |             |             |             | C | 7.88298500  | -1.47714200 | 1.49345300  |
| <b>TS2-Rr</b> |             |             |             | H | 8.79473500  | -1.66797400 | 2.05951400  |
| C             | 6.61784400  | -1.62969100 | -0.57215700 | C | 6.79570000  | -0.83788800 | 2.10123600  |
| C             | 5.53211400  | -0.98523300 | 0.05404600  | H | 6.85812900  | -0.52778500 | 3.14519100  |
| C             | 6.48761900  | -2.02358400 | -1.95596800 | H | 8.62278400  | -2.36733900 | -0.32711100 |
| H             | 7.33718700  | -2.51672300 | -2.43340900 | H | 4.79057200  | -0.09185300 | 1.89218000  |
| C             | 5.35446600  | -1.79885600 | -2.65027500 | P | -1.67199100 | -0.03952400 | 0.16996400  |
| H             | 5.23079500  | -2.09281900 | -3.69182800 | O | -1.25179100 | 0.58351700  | 1.45466100  |
| N             | 4.37749900  | -0.74634700 | -0.70918100 | O | -0.71652600 | -0.70498300 | -0.77542000 |
| C             | 4.19014200  | -1.15532600 | -2.04696600 | H | -6.11455700 | -0.67511200 | -4.01018800 |
| N             | 3.30632800  | -0.17865500 | -0.05878200 | H | -7.21077200 | -1.09730900 | -2.68433000 |
| C             | 2.47580600  | -0.94908300 | 0.83523400  | H | -5.14349300 | -3.34700500 | -3.66873400 |
| C             | 1.65701000  | -0.07774100 | 1.44591400  | C | -6.19349300 | -0.73952500 | -2.91557600 |
| C             | 1.89340300  | 1.29624900  | 0.90900400  | C | -4.70864000 | -2.89305800 | -2.77607600 |
| C             | 2.91130400  | 1.08019400  | -0.15540500 | H | -6.76298500 | 1.26796900  | -2.15158500 |
| O             | 1.17081200  | 0.78842000  | -1.72049300 | C | -5.89683400 | 0.59306800  | -2.21081700 |
| C             | 3.62835300  | 2.11965500  | -0.91358400 | C | -5.15311200 | -1.65751900 | -2.31689400 |
| C             | 2.91155200  | 3.01658700  | -1.71742600 | H | -5.08812400 | 1.11968700  | -2.74099100 |
| C             | 5.01592800  | 2.26637700  | -0.76173400 | C | -3.68672500 | -3.54011600 | -2.08215700 |
| C             | 3.58834100  | 4.03876000  | -2.37673900 | H | -3.33334200 | -4.51644100 | -2.42119400 |
| H             | 1.84084500  | 2.86494000  | -1.84112200 | H | -7.36463300 | -0.69086500 | -0.37238300 |
| C             | 5.67791200  | 3.30308900  | -1.41405200 | H | -7.73566300 | 1.72191800  | -0.03570800 |
| H             | 5.58018600  | 1.59802700  | -0.11020600 | C | -4.60100900 | -1.08111800 | -1.16656600 |
| C             | 4.96677200  | 4.18657500  | -2.22562600 | C | -5.37043300 | 0.18118700  | -0.80764100 |
| H             | 3.02990200  | 4.72559800  | -3.01489300 | C | -6.56834200 | -0.12693900 | 0.13470200  |
| H             | 6.75439900  | 3.41992600  | -1.28314100 | C | -7.01591200 | 1.24939400  | 0.65348900  |
| H             | 5.48981400  | 4.99351900  | -2.74154500 | C | -3.06904400 | -2.95838000 | -0.96708400 |
| H             | 1.66160900  | 0.20056800  | -2.31233700 | C | -3.53362600 | -1.70754300 | -0.52296000 |
| H             | 2.33926800  | 1.96256500  | 1.67316100  | C | -4.74504600 | 1.35507400  | -0.07481300 |
| H             | 0.97767900  | 1.79914400  | 0.55581400  | C | -5.71585300 | 2.01885700  | 0.68258900  |
| O             | 3.13733900  | -0.96931700 | -2.61442400 | H | -6.19984700 | -0.73607000 | 0.97468400  |
| H             | 0.43451900  | 0.21220700  | -1.36124400 | O | -2.48066200 | 1.08675000  | -0.74329300 |
| C             | 0.77547700  | -0.32001500 | 2.62080000  | H | -7.49745500 | 1.20084800  | 1.64049000  |
| O             | 0.18355900  | -1.50770100 | 2.58448300  | C | -3.43305500 | 1.82486400  | -0.09446400 |
| O             | 0.71255300  | 0.45905500  | 3.53330500  | C | -0.74597600 | -3.91745400 | -0.96028100 |
| C             | -0.83430600 | -1.70600100 | 3.55806600  | C | -1.95270000 | -3.67247100 | -0.27869800 |
| H             | -0.42270700 | -1.63083800 | 4.57428200  | C | -5.40288400 | 3.19519200  | 1.35623200  |
| H             | -1.23578800 | -2.70845200 | 3.37874300  | O | -2.91275600 | -1.07823000 | 0.52421800  |
| H             | -1.61247900 | -0.94374600 | 3.41441600  | C | -1.08569900 | 3.99717700  | -0.56461800 |
| C             | 2.64406400  | -2.42145300 | 0.89497900  | C | -3.08632900 | 3.00072500  | 0.59547200  |
| H             | 3.63486400  | -2.71148700 | 1.27606500  | H | -6.15847800 | 3.72349900  | 1.94102600  |
| H             | 2.51228300  | -2.84429000 | -0.11237800 | C | -4.09722900 | 3.68066800  | 1.28975300  |
| H             | 1.85983600  | -2.83611000 | 1.53751400  | C | 0.25456800  | -4.65624300 | -0.32001700 |
| C             | 7.78825700  | -1.86708400 | 0.16790600  |   |             |             |             |

|               |             |             |             |   |             |             |             |
|---------------|-------------|-------------|-------------|---|-------------|-------------|-------------|
| H             | 0.62802300  | 4.98102500  | -1.41585200 | H | 7.51367600  | -1.42747200 | 2.12849400  |
| C             | -2.13093100 | -4.15412700 | 1.03416400  | N | 4.66845800  | -0.09364900 | 0.85396800  |
| H             | 1.18863200  | -4.84911300 | -0.85600000 | C | 5.45779200  | -1.00674600 | 1.59611200  |
| C             | 0.17982200  | 4.59464600  | -0.49596700 | N | 3.32550500  | -0.35222300 | 0.90956300  |
| C             | -1.69084800 | 3.53644900  | 0.61985000  | C | 2.56065800  | -0.01100700 | 2.06776500  |
| H             | -3.83469000 | 4.60139600  | 1.81505700  | C | 1.39800200  | -0.68072800 | 2.00388800  |
| C             | 0.10159000  | -5.14273100 | 0.97804300  | C | 1.43099600  | -1.60968500 | 0.82268000  |
| C             | -1.10039600 | -4.87797600 | 1.63964000  | C | 2.56908600  | -1.05042900 | 0.01779000  |
| C             | 0.87096900  | 4.72816000  | 0.70849600  | O | 1.60182500  | 0.37764100  | -0.79694800 |
| C             | -1.00334300 | 3.64654700  | 1.84936800  | C | 3.07980300  | -1.74383800 | -1.19409100 |
| H             | -1.24457200 | -5.25471300 | 2.65710600  | C | 2.11135000  | -2.17101700 | -2.11922700 |
| C             | 0.26268400  | 4.23648600  | 1.86716200  | C | 4.43200600  | -2.01299200 | -1.44760800 |
| H             | 0.79069900  | 4.31247600  | 2.82267000  | C | 2.49419000  | -2.83114800 | -3.28184100 |
| C             | 2.24328700  | 5.34823600  | 0.76325200  | H | 1.04896200  | -1.97426100 | -1.93846700 |
| H             | 3.03139600  | 4.57628100  | 0.80378500  | C | 4.80349400  | -2.69252200 | -2.60657900 |
| H             | 2.44108900  | 5.96658700  | -0.12340200 | H | 5.21451100  | -1.71149400 | -0.75762100 |
| H             | 2.35831900  | 5.97994800  | 1.65609500  | C | 3.84104800  | -3.09699800 | -3.52763700 |
| C             | -1.59357900 | 3.12004400  | 3.13136400  | H | 1.73272800  | -3.13897400 | -3.99960800 |
| H             | -2.35375100 | 3.80237500  | 3.54215900  | H | 5.85894900  | -2.90022200 | -2.78662000 |
| H             | -2.05678400 | 2.14193500  | 2.95045900  | H | 4.13883000  | -3.62011700 | -4.43778000 |
| H             | -0.80758600 | 2.99006200  | 3.88689300  | H | 1.03137600  | 0.00936700  | -1.50640200 |
| C             | -1.77347900 | 3.86964500  | -1.89826500 | H | 1.75586800  | -2.61746300 | 1.14699800  |
| H             | -1.76727000 | 2.82006800  | -2.22906700 | H | 0.49134900  | -1.73664400 | 0.26744300  |
| H             | -2.82460800 | 4.18874500  | -1.84327500 | O | 4.93188200  | -1.93526000 | 2.16653600  |
| H             | -1.26532500 | 4.47649000  | -2.65998300 | H | 0.86062700  | 0.67017700  | -0.14104500 |
| C             | 1.19644500  | -5.92379400 | 1.65782400  | C | 0.18265900  | -0.55340600 | 2.82950000  |
| H             | 2.11574400  | -5.93170400 | 1.05539300  | O | 0.09533400  | 0.62143500  | 3.45818100  |
| H             | 1.43559300  | -5.49755600 | 2.64420000  | O | -0.65643300 | -1.41156800 | 2.90088300  |
| H             | 0.89558000  | -6.97013800 | 1.82334800  | C | -1.17411700 | 0.90929700  | 4.02893900  |
| C             | -3.41205700 | -3.90025100 | 1.78523700  | H | -1.43143600 | 0.17714500  | 4.80681500  |
| H             | -3.52758200 | -2.82789600 | 2.00431100  | H | -1.09762900 | 1.91249300  | 4.46184900  |
| H             | -4.28844000 | -4.20480700 | 1.19340400  | H | -1.94489500 | 0.89087500  | 3.24418700  |
| H             | -3.42727200 | -4.45502800 | 2.73350500  | C | 3.13483800  | 0.95268100  | 3.04026500  |
| C             | -0.50823300 | -3.38418600 | -2.34909300 | H | 4.01809500  | 0.51557200  | 3.53123900  |
| H             | 0.56438500  | -3.40194500 | -2.58929000 | H | 3.44674000  | 1.87772000  | 2.53194700  |
| H             | -1.03230100 | -3.97856900 | -3.11336600 | H | 2.38570900  | 1.19229300  | 3.80059300  |
| H             | -0.85912400 | -2.34603200 | -2.41406000 | P | -1.45056600 | 0.10573900  | -0.47007500 |
|               |             |             |             | O | -0.52892200 | 0.78270800  | 0.52047200  |
|               |             |             |             | O | -0.82909400 | -0.62913100 | -1.61770500 |
|               |             |             |             | H | -7.15826300 | -0.65497200 | -2.50057500 |
|               |             |             |             | H | -7.65846600 | -0.95157400 | -0.82821100 |
|               |             |             |             | H | -6.16267000 | -3.35774100 | -2.31418900 |
|               |             |             |             | C | -6.80754300 | -0.64456100 | -1.45883500 |
|               |             |             |             | C | -5.40785400 | -2.84964600 | -1.71092700 |
| <b>TS2-Rs</b> |             |             |             |   |             |             |             |
| C             | 6.54609100  | 1.27482000  | 0.21926500  |   |             |             |             |
| C             | 5.15368600  | 1.04466300  | 0.19687800  |   |             |             |             |
| C             | 7.39481300  | 0.34728900  | 0.92927200  |   |             |             |             |
| H             | 8.47084500  | 0.53636200  | 0.93444100  |   |             |             |             |
| C             | 6.89067200  | -0.72243600 | 1.57934600  |   |             |             |             |

|   |             |             |             |                |             |             |             |
|---|-------------|-------------|-------------|----------------|-------------|-------------|-------------|
| H | -7.02583400 | 1.42310900  | -0.67343200 | H              | 2.54672000  | 4.70183300  | -3.21266900 |
| C | -6.25473000 | 0.72342100  | -1.02664600 | H              | 1.80696200  | 6.30699100  | -3.14021200 |
| C | -5.62333700 | -1.55830000 | -1.24095800 | C              | -0.06302600 | 3.65929600  | 1.66910300  |
| H | -5.72812100 | 1.19401100  | -1.87145900 | H              | -0.64825600 | 4.34821500  | 2.29693000  |
| C | -4.20984700 | -3.49205500 | -1.39510300 | H              | -0.42718100 | 2.63726100  | 1.84192700  |
| H | -4.03906200 | -4.51824500 | -1.72771800 | H              | 0.98366700  | 3.71682300  | 2.00015600  |
| H | -6.86689900 | -0.37189700 | 1.33980200  | C              | -2.66846200 | 3.84270900  | -2.69575600 |
| H | -7.05199200 | 2.06713400  | 1.62409300  | H              | -2.84193400 | 2.76629600  | -2.84400500 |
| C | -4.65734600 | -0.91665800 | -0.45754000 | H              | -3.55271400 | 4.24950800  | -2.18337200 |
| C | -5.21149300 | 0.39170700  | 0.07673000  | H              | -2.59168200 | 4.31692200  | -3.68332000 |
| C | -5.92862700 | 0.19189500  | 1.44179700  | C              | 1.73170600  | -5.59696400 | 0.74362800  |
| C | -6.11611800 | 1.61500800  | 1.99246400  | H              | 1.91153200  | -5.56982400 | 1.82698900  |
| C | -3.19821500 | -2.84967400 | -0.66900400 | H              | 1.71204300  | -6.65344200 | 0.43271600  |
| C | -3.43312700 | -1.53738100 | -0.22671100 | H              | 2.59181400  | -5.12845900 | 0.24050400  |
| C | -4.33585700 | 1.58723500  | 0.40274900  | C              | -2.65882500 | -3.51399500 | 2.10622600  |
| C | -4.91597300 | 2.34096200  | 1.43013800  | H              | -2.68980600 | -2.42498800 | 2.24636500  |
| H | -5.25954300 | -0.37854900 | 2.10517100  | H              | -3.67018400 | -3.86299500 | 1.84827000  |
| O | -2.51305900 | 1.19599200  | -1.08669400 | H              | -2.36544200 | -3.96316200 | 3.06427500  |
| H | -6.15172500 | 1.64969800  | 3.09049800  | C              | -1.25070700 | -3.57091000 | -2.76680100 |
| C | -3.14936300 | 2.01752000  | -0.18392800 | H              | -0.39471600 | -3.87620000 | -3.38484500 |
| C | -1.01209000 | -3.92782400 | -1.32298600 | H              | -2.14521400 | -4.06524400 | -3.17260300 |
| C | -1.92932200 | -3.55524600 | -0.32034500 | H              | -1.39440700 | -2.48381800 | -2.85967500 |
| C | -4.36495700 | 3.56123800  | 1.80734900  | C              | 7.06220400  | 2.40409000  | -0.43975200 |
| O | -2.44099200 | -0.84334000 | 0.42719400  | C              | 4.30150900  | 1.93000000  | -0.47522200 |
| C | -1.41326100 | 4.07324800  | -1.89486300 | C              | 6.22241500  | 3.28273700  | -1.10223800 |
| C | -2.57849900 | 3.25270000  | 0.16757700  | H              | 6.63016500  | 4.15651600  | -1.61091700 |
| H | -4.81944400 | 4.15809000  | 2.60061500  | C              | 4.84318400  | 3.03713900  | -1.11453600 |
| C | -3.21854300 | 4.01531500  | 1.15394600  | H              | 4.17110700  | 3.71856200  | -1.63774500 |
| C | 0.15693000  | -4.59723200 | -0.95262200 | H              | 8.14047100  | 2.57328400  | -0.41574200 |
| H | -0.33846800 | 4.85326300  | -3.58470900 | H              | 3.23070000  | 1.73824300  | -0.51679900 |
| C | -1.67188100 | -3.87047600 | 1.02754200  |                |             |             |             |
| H | 0.87444500  | -4.87625800 | -1.72963900 | <b>INT4-Sr</b> |             |             |             |
| C | -0.28577900 | 4.61005200  | -2.51969500 | C              | -4.64420200 | 2.50255200  | -2.10908300 |
| C | -1.35579600 | 3.76893000  | -0.51799300 | C              | -3.63319300 | 1.84777500  | -1.37551800 |
| H | -2.79019000 | 4.98415000  | 1.41934700  | C              | -5.92573600 | 2.72820500  | -1.48287600 |
| C | 0.44555600  | -4.90024100 | 0.38174200  | H              | -6.69773300 | 3.23828900  | -2.06374600 |
| C | -0.48179700 | -4.53005700 | 1.35538200  | C              | -6.18052400 | 2.33858700  | -0.21661900 |
| C | 0.89857200  | 4.85531800  | -1.82119000 | H              | -7.13939200 | 2.50769800  | 0.27171200  |
| C | -0.17019200 | 4.00090600  | 0.20491000  | N              | -3.95301100 | 1.41689200  | -0.08068200 |
| H | -0.27735100 | -4.75148700 | 2.40626500  | C              | -5.18803500 | 1.63227300  | 0.58665900  |
| C | 0.93574600  | 4.54087800  | -0.46208800 | N              | -3.04725900 | 0.68366800  | 0.64570900  |
| H | 1.85268100  | 4.72467400  | 0.10566100  | C              | -2.00001900 | 1.28173000  | 1.43695000  |
| C | 2.09376900  | 5.43812400  | -2.52967300 | C              | -1.55803100 | 0.31914200  | 2.26489600  |
| H | 2.86282900  | 5.76607200  | -1.81669200 | C              | -2.26633900 | -0.95695900 | 1.98221100  |

|   |             |             |             |   |             |             |             |
|---|-------------|-------------|-------------|---|-------------|-------------|-------------|
| C | -3.23734500 | -0.58657200 | 0.93575900  | C | 4.85345600  | 2.18571500  | -2.68623100 |
| O | -1.55332900 | -1.26030500 | -0.99782800 | H | 6.09226000  | -2.30273600 | -2.20465000 |
| C | -4.32088900 | -1.39523300 | 0.38075000  | C | 5.35806600  | -1.48604800 | -2.25688500 |
| C | -4.56614600 | -1.42189200 | -1.00062500 | C | 5.03474500  | 0.86544700  | -2.28796200 |
| C | -5.15494300 | -2.09396700 | 1.26431700  | H | 4.48229800  | -1.84982000 | -2.81675600 |
| C | -5.65808900 | -2.13362300 | -1.48530800 | C | 3.99798200  | 2.99788600  | -1.94362500 |
| H | -3.86569400 | -0.92818400 | -1.67546300 | H | 3.87196300  | 4.04838700  | -2.21492600 |
| C | -6.25402900 | -2.79003500 | 0.76755400  | H | 6.98935000  | -0.57086400 | -0.32788900 |
| H | -4.96798000 | -2.05757700 | 2.33863000  | H | 6.91475600  | -3.02074800 | -0.10196800 |
| C | -6.50728100 | -2.80616100 | -0.60375500 | C | 4.36880300  | 0.35977100  | -1.16529300 |
| H | -5.84429500 | -2.16795500 | -2.55949700 | C | 4.88207000  | -1.03354200 | -0.84743100 |
| H | -6.91530300 | -3.31846300 | 1.45519800  | C | 6.08800700  | -1.00033200 | 0.13286600  |
| H | -7.36791700 | -3.35478600 | -0.99021600 | C | 6.25774200  | -2.46136900 | 0.58471100  |
| H | -1.11526100 | -2.12195200 | -1.02225900 | C | 3.27642800  | 2.50450600  | -0.84770200 |
| H | -2.73650600 | -1.44709300 | 2.84965400  | C | 3.44714200  | 1.15714200  | -0.48671700 |
| H | -1.54782800 | -1.67345500 | 1.53303800  | C | 4.03092200  | -2.10440700 | -0.19517400 |
| O | -5.35086300 | 1.21847100  | 1.71097200  | C | 4.84308400  | -2.99099900 | 0.52060900  |
| H | -0.82274100 | -0.60969600 | -1.03426500 | H | 5.81489900  | -0.37460200 | 0.99690100  |
| C | -0.46203500 | 0.36567700  | 3.25829200  | O | 1.85844500  | -1.36759100 | -0.83872700 |
| O | 0.32004400  | 1.42918700  | 3.09963400  | H | 6.69260200  | -2.55137800 | 1.59039700  |
| O | -0.33478000 | -0.46110500 | 4.12195500  | C | 2.66175400  | -2.33228300 | -0.28626100 |
| C | 1.55576000  | 1.38651600  | 3.79908200  | C | 1.28716100  | 4.03312500  | -0.62974300 |
| H | 1.39342800  | 1.20589900  | 4.87000800  | C | 2.42155600  | 3.43605100  | -0.05416100 |
| H | 2.03048500  | 2.36049300  | 3.64289900  | C | 4.30830100  | -4.15459800 | 1.06345400  |
| H | 2.17253800  | 0.58085400  | 3.37442700  | O | 2.71504000  | 0.61860600  | 0.54058400  |
| C | -1.55459300 | 2.66895400  | 1.16728900  | C | 0.21548100  | -4.09222800 | -1.30945700 |
| H | -2.36998700 | 3.29324000  | 0.77699300  | C | 2.10456900  | -3.51821900 | 0.22306900  |
| H | -0.73320800 | 2.62447400  | 0.43306200  | H | 4.93561500  | -4.85295700 | 1.62076900  |
| H | -1.15207300 | 3.11455000  | 2.08305800  | C | 2.95044700  | -4.42108800 | 0.87938700  |
| C | -4.36507000 | 2.92373400  | -3.42032000 | C | 0.57002200  | 4.98256300  | 0.10795300  |
| C | -2.36237500 | 1.64810600  | -1.92629500 | H | -1.46419500 | -4.63886000 | -2.54043900 |
| C | -3.11950300 | 2.70232300  | -3.98363200 | C | 2.81840200  | 3.78878500  | 1.25267200  |
| H | -2.91142000 | 3.02494300  | -5.00404700 | H | -0.31813900 | 5.43633800  | -0.34135300 |
| C | -2.12363400 | 2.06955900  | -3.22828700 | C | -1.12095300 | -4.45430900 | -1.51910200 |
| H | -1.13317700 | 1.90545900  | -3.65557800 | C | 0.66522200  | -3.84860400 | 0.00503200  |
| H | -5.15230900 | 3.42888600  | -3.98336900 | H | 2.52255900  | -5.34820900 | 1.26698700  |
| H | -1.56099500 | 1.18574900  | -1.34869800 | C | 0.93999400  | 5.34350600  | 1.40278000  |
| P | 1.31102000  | -0.18881200 | 0.20377200  | C | 2.06719100  | 4.73017200  | 1.95929000  |
| O | 0.88304700  | -0.83136700 | 1.47703500  | C | -2.02417500 | -4.57389400 | -0.46182300 |
| O | 0.40320200  | 0.65911300  | -0.64478600 | C | -0.22740000 | -3.97403500 | 1.09042500  |
| H | 5.81769000  | -0.22036300 | -4.01103800 | H | 2.37830800  | 5.00413900  | 2.97211600  |
| H | 6.95819500  | -0.04339700 | -2.66794000 | C | -1.55715600 | -4.32390300 | 0.83201400  |
| H | 5.37684600  | 2.58504100  | -3.55717300 | H | -2.25215300 | -4.40790200 | 1.67350700  |
| C | 5.89571200  | -0.20649000 | -2.91461200 | C | -3.45294200 | -4.98182700 | -0.69900700 |

|                |             |             |             |   |             |             |             |
|----------------|-------------|-------------|-------------|---|-------------|-------------|-------------|
| H              | -4.13951600 | -4.40276900 | -0.06510600 | C | -4.68930100 | -1.64246300 | 3.34502100  |
| H              | -3.74239300 | -4.83290600 | -1.74815800 | H | -5.29934500 | -1.09984600 | 1.36206300  |
| H              | -3.60097400 | -6.04679000 | -0.45848500 | C | -3.61991800 | -1.82291100 | 4.22414800  |
| C              | 0.21813700  | -3.70615300 | 2.50412200  | H | -1.47868500 | -1.71225500 | 4.49201800  |
| H              | 0.91516200  | -4.47893700 | 2.86133100  | H | -5.71068800 | -1.83703500 | 3.67413000  |
| H              | 0.72752400  | -2.73338800 | 2.55990600  | H | -3.80911200 | -2.14882800 | 5.24851300  |
| H              | -0.64224600 | -3.69652300 | 3.18788000  | H | -1.75379800 | 2.19755600  | 0.88462300  |
| C              | 1.14128100  | -3.95165600 | -2.48952300 | H | -1.71062900 | -2.05286900 | -0.72980100 |
| H              | 1.38554100  | -2.89197600 | -2.66113800 | H | -0.67793000 | -0.94417600 | 0.14489100  |
| H              | 2.09010500  | -4.48122100 | -2.32036100 | O | -3.74093200 | 2.68167300  | 0.55934500  |
| H              | 0.67576700  | -4.35053300 | -3.40045000 | H | -0.47376800 | 1.47962900  | 0.39830700  |
| C              | 0.14840200  | 6.35143900  | 2.19443800  | C | -0.48249100 | -0.17100900 | -2.65767100 |
| H              | -0.21160500 | 5.91773400  | 3.14007500  | O | -0.31041300 | 0.96680200  | -3.32377400 |
| H              | 0.76427800  | 7.22623800  | 2.45379500  | O | 0.16939400  | -1.16464500 | -2.83066600 |
| H              | -0.72407700 | 6.70695500  | 1.62962700  | C | 0.89055600  | 1.03418900  | -4.08407000 |
| C              | 4.04552100  | 3.17574300  | 1.87645900  | H | 0.88170800  | 0.29214300  | -4.89467000 |
| H              | 3.90817600  | 2.09448400  | 2.02884000  | H | 0.94021300  | 2.04743300  | -4.49596200 |
| H              | 4.92443600  | 3.30102200  | 1.22597400  | H | 1.74822600  | 0.84215500  | -3.42342200 |
| H              | 4.26606200  | 3.64007100  | 2.84759000  | C | -3.28525900 | 1.63358500  | -2.63771100 |
| C              | 0.80867000  | 3.62317700  | -1.99809300 | H | -4.30175100 | 1.36590000  | -2.96420800 |
| H              | -0.18906500 | 4.03914000  | -2.19766200 | H | -3.32418400 | 2.61366800  | -2.13788100 |
| H              | 1.48401100  | 3.97080400  | -2.79455600 | H | -2.63259100 | 1.71395200  | -3.51258600 |
| H              | 0.75909500  | 2.52491900  | -2.05118000 | P | 1.67205100  | 0.01518400  | 0.25484100  |
|                |             |             |             | O | 0.93363100  | 0.89560700  | -0.70989400 |
|                |             |             |             | O | 0.96589500  | -0.76501900 | 1.31309400  |
|                |             |             |             | H | 7.16351000  | -1.74167800 | 2.39364100  |
|                |             |             |             | H | 7.66035300  | -1.95342500 | 0.70636900  |
|                |             |             |             | H | 5.75594100  | -4.20857100 | 2.01002000  |
|                |             |             |             | C | 6.84623600  | -1.58509300 | 1.35291700  |
|                |             |             |             | C | 5.11249900  | -3.55239700 | 1.42040900  |
|                |             |             |             | H | 7.38311900  | 0.49493800  | 0.78507700  |
|                |             |             |             | C | 6.50719300  | -0.11850500 | 1.04163100  |
|                |             |             |             | C | 5.54772600  | -2.28894500 | 1.03296400  |
|                |             |             |             | H | 6.01299900  | 0.33913300  | 1.91256500  |
|                |             |             |             | C | 3.82775700  | -3.96244000 | 1.06304200  |
|                |             |             |             | H | 3.47345700  | -4.95196500 | 1.36019700  |
|                |             |             |             | H | 7.06285900  | -1.05954900 | -1.40762800 |
|                |             |             |             | H | 7.60623300  | 1.34538300  | -1.40657500 |
|                |             |             |             | C | 4.72298000  | -1.45580600 | 0.26872800  |
|                |             |             |             | C | 5.47713000  | -0.19259100 | -0.12071900 |
|                |             |             |             | C | 6.22199200  | -0.35427000 | -1.47550100 |
|                |             |             |             | C | 6.63827800  | 1.07502200  | -1.86072000 |
|                |             |             |             | C | 2.95269800  | -3.12511100 | 0.35787400  |
|                |             |             |             | C | 3.42450700  | -1.85948100 | -0.03908100 |
| <b>INT4-Ss</b> |             |             |             |   |             |             |             |
| C              | -7.10013600 | 0.60601500  | -0.50138300 |   |             |             |             |
| C              | -5.81796300 | 0.07851500  | -0.75503900 |   |             |             |             |
| C              | -7.20444600 | 1.86216400  | 0.20619200  |   |             |             |             |
| H              | -8.20313800 | 2.25352600  | 0.41282200  |   |             |             |             |
| C              | -6.11218100 | 2.55054700  | 0.59573500  |   |             |             |             |
| H              | -6.17172100 | 3.50716700  | 1.11363600  |   |             |             |             |
| N              | -4.71011400 | 0.79290400  | -0.27311400 |   |             |             |             |
| C              | -4.75912800 | 2.07223800  | 0.32045500  |   |             |             |             |
| N              | -3.46665200 | 0.26951600  | -0.52743900 |   |             |             |             |
| C              | -2.73033100 | 0.61436100  | -1.71174800 |   |             |             |             |
| C              | -1.60132900 | -0.11607500 | -1.68570000 |   |             |             |             |
| C              | -1.59606900 | -0.97710600 | -0.47435500 |   |             |             |             |
| C              | -2.78728600 | -0.54264800 | 0.26961600  |   |             |             |             |
| O              | -1.23286500 | 1.39503800  | 1.00763200  |   |             |             |             |
| C              | -3.13892000 | -0.98386500 | 1.61223700  |   |             |             |             |
| C              | -2.05806800 | -1.17578200 | 2.49502300  |   |             |             |             |
| C              | -4.45706600 | -1.21447800 | 2.04297300  |   |             |             |             |
| C              | -2.31243600 | -1.58598900 | 3.80027200  |   |             |             |             |
| H              | -1.03550400 | -0.95015200 | 2.17207400  |   |             |             |             |

|   |             |             |             |                |             |             |             |
|---|-------------|-------------|-------------|----------------|-------------|-------------|-------------|
| C | 4.79187100  | 1.14637100  | -0.34931600 | C              | 2.10519500  | -3.52651600 | -2.42037300 |
| C | 5.51994600  | 1.90515300  | -1.27289600 | H              | 2.26083600  | -2.44560900 | -2.54568500 |
| H | 5.50798900  | -0.74448600 | -2.21742500 | H              | 3.08274100  | -3.99779000 | -2.23968700 |
| O | 2.86125000  | 0.87625100  | 1.01652000  | H              | 1.69376800  | -3.92040500 | -3.35961200 |
| H | 6.74049200  | 1.21584100  | -2.94622500 | C              | 1.03039800  | -3.57221000 | 2.54477700  |
| C | 3.63817000  | 1.67759000  | 0.22365600  | H              | 0.14009200  | -3.60727200 | 3.18860300  |
| C | 0.64523100  | -3.80636700 | 1.10794400  | H              | 1.73686600  | -4.33247300 | 2.91049300  |
| C | 1.55755600  | -3.57067300 | 0.05397100  | H              | 1.50154800  | -2.58529300 | 2.64487800  |
| C | 5.14942400  | 3.21554300  | -1.55952600 | C              | -8.22674300 | -0.10507600 | -0.94786200 |
| O | 2.59728000  | -0.98347900 | -0.68784900 | C              | -5.67049900 | -1.13409300 | -1.44270900 |
| C | 1.86201800  | 3.70731600  | 1.92529500  | C              | -8.08583500 | -1.30404000 | -1.62734700 |
| C | 3.23234000  | 2.99541300  | -0.05981200 | H              | -8.96581000 | -1.84966200 | -1.96831900 |
| H | 5.72074700  | 3.81378000  | -2.27225600 | C              | -6.80421700 | -1.81143200 | -1.87308800 |
| C | 4.02206500  | 3.75226400  | -0.93542500 | H              | -6.68390100 | -2.75450100 | -2.40795700 |
| C | -0.64764900 | -4.23319600 | 0.80248100  | H              | -9.21691400 | 0.30928600  | -0.74852300 |
| H | 0.58258300  | 4.31278300  | 3.54511400  | H              | -4.68139700 | -1.54759500 | -1.64156500 |
| C | 1.15810300  | -3.77416200 | -1.27797800 |                |             |             |             |
| H | -1.35583100 | -4.39928100 | 1.62037100  | <b>INT4-Rr</b> |             |             |             |
| C | 0.66775300  | 4.20477800  | 2.46046200  | C              | -7.10022500 | 0.60604000  | -0.50186600 |
| C | 1.97836700  | 3.55386000  | 0.53170500  | C              | -5.81799200 | 0.07846300  | -0.75507700 |
| H | 3.72191600  | 4.78019300  | -1.15003400 | C              | -7.20472800 | 1.86212300  | 0.20579200  |
| C | -1.06511600 | -4.44378000 | -0.51751900 | H              | -8.20348300 | 2.25355800  | 0.41198200  |
| C | -0.14924900 | -4.20701900 | -1.54054200 | C              | -6.11257600 | 2.55034700  | 0.59592100  |
| C | -0.41195600 | 4.55556500  | 1.65323800  | H              | -6.17224500 | 3.50690800  | 1.11391800  |
| C | 0.89987000  | 3.91388400  | -0.30633900 | N              | -4.71026600 | 0.79277900  | -0.27273600 |
| H | -0.45302300 | -4.35178500 | -2.58073900 | C              | -4.75942700 | 2.07193200  | 0.32124200  |
| C | -0.27202900 | 4.40604600  | 0.26979600  | N              | -3.46674100 | 0.26957300  | -0.52708400 |
| H | -1.11253200 | 4.66490600  | -0.38207000 | C              | -2.73051900 | 0.61453500  | -1.71140000 |
| C | -1.70272600 | 5.06522500  | 2.23849400  | C              | -1.60146900 | -0.11583800 | -1.68549900 |
| H | -1.92765900 | 6.08064700  | 1.87696300  | C              | -1.59607000 | -0.97692600 | -0.47420300 |
| H | -2.54557800 | 4.42041100  | 1.94615900  | C              | -2.78728600 | -0.54261400 | 0.26985100  |
| H | -1.65821500 | 5.09656200  | 3.33540300  | O              | -1.23238200 | 1.39519100  | 1.00758400  |
| C | 0.97244200  | 3.72792900  | -1.79971400 | C              | -3.13883200 | -0.98391300 | 1.61245700  |
| H | 1.56342700  | 4.51983300  | -2.28611800 | C              | -2.05795100 | -1.17568500 | 2.49522900  |
| H | 1.42757200  | 2.75585100  | -2.02523600 | C              | -4.45695000 | -1.21469400 | 2.04318000  |
| H | -0.03664800 | 3.74303000  | -2.23566800 | C              | -2.31226500 | -1.58591400 | 3.80048400  |
| C | 2.98973100  | 3.33370400  | 2.85143500  | H              | -1.03542600 | -0.94990200 | 2.17225400  |
| H | 3.07022000  | 2.23942700  | 2.93304200  | C              | -4.68912900 | -1.64272500 | 3.34522500  |
| H | 3.95583000  | 3.70763000  | 2.48169900  | H              | -5.29923100 | -1.10012300 | 1.36225800  |
| H | 2.82076100  | 3.74337800  | 3.85642700  | C              | -3.61971800 | -1.82302800 | 4.22435000  |
| C | -2.47467900 | -4.89403500 | -0.80739300 | H              | -1.47850300 | -1.71205800 | 4.49223800  |
| H | -2.68098500 | -4.89638500 | -1.88667200 | H              | -5.71048900 | -1.83741000 | 3.67434800  |
| H | -2.65317200 | -5.91228500 | -0.42843500 | H              | -3.80887100 | -2.14895900 | 5.24871900  |
| H | -3.21284900 | -4.23979100 | -0.31489000 | H              | -1.75266500 | 2.19828200  | 0.88557000  |



|   |             |             |             |   |             |             |             |
|---|-------------|-------------|-------------|---|-------------|-------------|-------------|
| H | -1.71072200 | -2.05264400 | -0.72977400 | C | 1.55744400  | -3.57074400 | 0.05395000  |
| H | -0.67788200 | -0.94405500 | 0.14497100  | C | 5.14956900  | 3.21552300  | -1.55950000 |
| O | -3.74130300 | 2.68115500  | 0.56091900  | O | 2.59735900  | -0.98344300 | -0.68800200 |
| H | -0.47358300 | 1.47970200  | 0.39787000  | C | 1.86212700  | 3.70734600  | 1.92528500  |
| C | -0.48269700 | -0.17080200 | -2.65754800 | C | 3.23247700  | 2.99541300  | -0.05981000 |
| O | -0.31068100 | 0.96691600  | -3.32381600 | H | 5.72095600  | 3.81374900  | -2.27218800 |
| O | 0.16913600  | -1.16448300 | -2.83050700 | C | 4.02225100  | 3.75228800  | -0.93535700 |
| C | 0.89030700  | 1.03418900  | -4.08414200 | C | -0.64771200 | -4.23319500 | 0.80268600  |
| H | 0.88142200  | 0.29203900  | -4.89464100 | H | 0.58273900  | 4.31304200  | 3.54506300  |
| H | 0.93995800  | 2.04737800  | -4.49617100 | C | 1.15781400  | -3.77415800 | -1.27796300 |
| H | 1.74795200  | 0.84223900  | -3.42343900 | H | -1.35580900 | -4.39925400 | 1.62065400  |
| C | -3.28535300 | 1.63396500  | -2.63719800 | C | 0.66790700  | 4.20496500  | 2.46041800  |
| H | -4.30206900 | 1.36673600  | -2.96336500 | C | 1.97850600  | 3.55388000  | 0.53170200  |
| H | -3.32369100 | 2.61407600  | -2.13736900 | H | 3.72218300  | 4.78026200  | -1.14986200 |
| H | -2.63293100 | 1.71406200  | -3.51228500 | C | -1.06534700 | -4.44370400 | -0.51726900 |
| P | 1.67210000  | 0.01514900  | 0.25476500  | C | -0.14958000 | -4.20694200 | -1.54039100 |
| O | 0.93358700  | 0.89548200  | -0.71000000 | C | -0.41171100 | 4.55593200  | 1.65316100  |
| O | 0.96609100  | -0.76514600 | 1.31302900  | C | 0.90006000  | 3.91400200  | -0.30637700 |
| H | 7.16360400  | -1.74192000 | 2.39331600  | H | -0.45350900 | -4.35157400 | -2.58056300 |
| H | 7.66037700  | -1.95358700 | 0.70601300  | C | -0.27177500 | 4.40636100  | 0.26971500  |
| H | 5.75594800  | -4.20881700 | 2.00963900  | H | -1.11219700 | 4.66540100  | -0.38218400 |
| C | 6.84628800  | -1.58528700 | 1.35261200  | C | -1.70248800 | 5.06564500  | 2.23836400  |
| C | 5.11251000  | -3.55257300 | 1.42010200  | H | -1.92846200 | 6.08023800  | 1.87518800  |
| H | 7.38313000  | 0.49478500  | 0.78485800  | H | -2.54505300 | 4.41969700  | 1.94767800  |
| C | 6.50722000  | -0.11868200 | 1.04140800  | H | -1.65732300 | 5.09890000  | 3.33519000  |
| C | 5.54776300  | -2.28911700 | 1.03268800  | C | 0.97268700  | 3.72798000  | -1.79973900 |
| H | 6.01305200  | 0.33890300  | 1.91238400  | H | 1.56417900  | 4.51950600  | -2.28613100 |
| C | 3.82773400  | -3.96254300 | 1.06278800  | H | 1.42732300  | 2.75563600  | -2.02511700 |
| H | 3.47342200  | -4.95207100 | 1.35992000  | H | -0.03633800 | 3.74362800  | -2.23582400 |
| H | 7.06280500  | -1.05966100 | -1.40788300 | C | 2.98976400  | 3.33361800  | 2.85146700  |
| H | 7.60624100  | 1.34526600  | -1.40677600 | H | 3.06990400  | 2.23933100  | 2.93330400  |
| C | 4.72298800  | -1.45594600 | 0.26852800  | H | 3.95597000  | 3.70714500  | 2.48161600  |
| C | 5.47712500  | -0.19272300 | -0.12091800 | H | 2.82096700  | 3.74357400  | 3.85637300  |
| C | 6.22195600  | -0.35435800 | -1.47572100 | C | -2.47485800 | -4.89423600 | -0.80700400 |
| C | 6.63825800  | 1.07494400  | -1.86088500 | H | -2.68288300 | -4.89176300 | -1.88596600 |
| C | 2.95262800  | -3.12517200 | 0.35770500  | H | -2.65146100 | -5.91456700 | -0.43274300 |
| C | 3.42448300  | -1.85956300 | -0.03923800 | H | -3.21302000 | -4.24336400 | -0.31011300 |
| C | 4.79187900  | 1.14626400  | -0.34942800 | C | 2.10479500  | -3.52647800 | -2.42044200 |
| C | 5.51997000  | 1.90507700  | -1.27298000 | H | 2.26075200  | -2.44559100 | -2.54549300 |
| H | 5.50792900  | -0.74453400 | -2.21764100 | H | 3.08222800  | -3.99809300 | -2.23999300 |
| O | 2.86122300  | 0.87628300  | 1.01642100  | H | 1.69312800  | -3.92002200 | -3.35971700 |
| H | 6.74042100  | 1.21581900  | -2.94638700 | C | 1.03051600  | -3.57229900 | 2.54482100  |
| C | 3.63822700  | 1.67754800  | 0.22357800  | H | 0.14025400  | -3.60737500 | 3.18871000  |
| C | 0.64523300  | -3.80645000 | 1.10801900  | H | 1.73703600  | -4.33253600 | 2.91047900  |

|   |             |             |             |   |             |             |             |
|---|-------------|-------------|-------------|---|-------------|-------------|-------------|
| H | 1.50165500  | -2.58537300 | 2.64488700  | C | 1.01971400  | -1.10825600 | 4.09602300  |
| C | -8.22671700 | -0.10491300 | -0.94885000 | H | 1.12414600  | -0.37355500 | 4.90646500  |
| C | -5.67036200 | -1.13408900 | -1.44279700 | H | 0.99304500  | -2.12426100 | 4.50317000  |
| C | -8.08564100 | -1.30380900 | -1.62842200 | H | 1.85633500  | -0.99430500 | 3.39170200  |
| H | -8.96553000 | -1.84930600 | -1.96981700 | C | -3.32088100 | -1.18793300 | 2.97689800  |
| C | -6.80397100 | -1.81128900 | -1.87369400 | H | -4.16243000 | -0.71172500 | 3.50258400  |
| H | -6.68351600 | -2.75431000 | -2.40861700 | H | -3.69154500 | -2.09001800 | 2.46686800  |
| H | -9.21693500 | 0.30950700  | -0.74986000 | H | -2.56092500 | -1.48238900 | 3.70757300  |
| H | -4.68122200 | -1.54765900 | -1.64131700 | P | 1.55559600  | -0.13666000 | -0.31242000 |

**INT4-Rs**

|   |             |             |             |   |            |             |             |
|---|-------------|-------------|-------------|---|------------|-------------|-------------|
| C | -6.64981400 | -1.48903800 | 0.14170900  | O | 0.88041100 | -0.96872100 | 0.73636800  |
| C | -5.27006100 | -1.19790300 | 0.11994800  | O | 0.75699000 | 0.49194800  | -1.41899100 |
| C | -7.53739900 | -0.61357000 | 0.86951200  | H | 6.99696100 | 1.64994100  | -2.57991500 |
| H | -8.60332100 | -0.85336600 | 0.87492100  | H | 7.47542600 | 2.01002200  | -0.91287300 |
| C | -7.08559600 | 0.47288400  | 1.53158100  | H | 5.53113800 | 4.11450800  | -2.35551300 |
| H | -7.74113100 | 1.14184300  | 2.08786800  | C | 6.67846700 | 1.56427900  | -1.53130400 |
| N | -4.84402100 | -0.05534200 | 0.81467200  | C | 4.89895200 | 3.48103100  | -1.73003800 |
| C | -5.67079600 | 0.82732900  | 1.54838200  | H | 7.27872100 | -0.44446000 | -0.79468100 |
| N | -3.50345700 | 0.22958700  | 0.90459000  | C | 6.38626500 | 0.11617100  | -1.10820400 |
| C | -2.71167600 | -0.24951800 | 2.00210100  | C | 5.35691800 | 2.24987600  | -1.27090800 |
| C | -1.50116200 | 0.32605000  | 1.88143000  | H | 5.91946600 | -0.42586700 | -1.94547200 |
| C | -1.50387500 | 1.23522000  | 0.70798100  | C | 3.61434400 | 3.89618800  | -1.37924300 |
| C | -2.82726000 | 1.03442000  | 0.10692000  | H | 3.24963400 | 4.87089000  | -1.71092000 |
| O | -1.39479200 | -1.28189600 | -0.83258200 | H | 6.87230000 | 1.26165800  | 1.27278500  |
| C | -3.28899600 | 1.60286800  | -1.15332800 | H | 7.50037200 | -1.11341800 | 1.46809400  |
| C | -2.36204000 | 1.61915400  | -2.21086100 | C | 4.54733400 | 1.44588600  | -0.46008900 |
| C | -4.58391000 | 2.11527200  | -1.33675500 | C | 5.33798000 | 0.24476700  | 0.03316500  |
| C | -2.75837600 | 2.09375200  | -3.45808600 | C | 6.05454000 | 0.53483400  | 1.38200200  |
| H | -1.34132500 | 1.25183300  | -2.05991600 | C | 6.51325000 | -0.84632500 | 1.88088400  |
| C | -4.95250500 | 2.61762300  | -2.57944200 | C | 2.75761100 | 3.08580600  | -0.62172300 |
| H | -5.28183500 | 2.17253000  | -0.50244900 | C | 3.24003100 | 1.84093600  | -0.18176700 |
| C | -4.04830900 | 2.59108100  | -3.64293100 | C | 4.69912100 | -1.09516900 | 0.35149900  |
| H | -2.04984500 | 2.07996600  | -4.28723200 | C | 5.43993800 | -1.76070600 | 1.33507800  |
| H | -5.95121200 | 3.03335700  | -2.71776100 | H | 5.31553600 | 0.95450400  | 2.08232800  |
| H | -4.35019000 | 2.97065900  | -4.62054600 | O | 2.76898400 | -0.98538600 | -1.04066100 |
| H | -0.82680000 | -0.80744800 | -1.46133800 | H | 6.59566400 | -0.90168600 | 2.97568300  |
| H | -1.43642300 | 2.29921200  | 1.02530300  | C | 3.58092200 | -1.70907300 | -0.20346900 |
| H | -0.68052500 | 1.11269300  | -0.02027900 | C | 0.41796700 | 3.77932100  | -1.25405700 |
| O | -5.18347900 | 1.78542700  | 2.10628500  | C | 1.39046800 | 3.56897800  | -0.25732700 |
| H | -0.74423900 | -1.47377400 | -0.12823600 | C | 5.11934000 | -3.06541000 | 1.69719600  |
| C | -0.31194300 | 0.24089300  | 2.76469100  | O | 2.41974100 | 0.99553900  | 0.51643800  |
| O | -0.20820000 | -0.92116100 | 3.40078500  | C | 2.05685800 | -3.93276500 | -1.88710200 |
| O | 0.44656400  | 1.16189000  | 2.90154300  | C | 3.24091000 | -3.03144200 | 0.13456200  |
|   |             |             |             | H | 5.69585600 | -3.59133400 | 2.46088700  |
|   |             |             |             | C | 4.03970400 | -3.69525700 | 1.07402400  |

|   |             |             |             |               |             |             |             |
|---|-------------|-------------|-------------|---------------|-------------|-------------|-------------|
| C | -0.82707500 | 4.30579900  | -0.88966200 | H             | -8.18173300 | -2.84488900 | -0.52758600 |
| H | 0.95285400  | -4.73705900 | -3.54623400 | H             | -3.30327800 | -1.77641700 | -0.61626200 |
| C | 1.10366000  | 3.88578800  | 1.08642900  |               |             |             |             |
| H | -1.58126500 | 4.46178700  | -1.66673000 | <b>TS3-Sr</b> |             |             |             |
| C | 0.95060600  | -4.55611500 | -2.46744600 | C             | 4.83349100  | -2.15348600 | -1.46462900 |
| C | 2.06249700  | -3.69930300 | -0.49552900 | C             | 3.78359000  | -1.53836400 | -0.75384100 |
| H | 3.78844700  | -4.72556400 | 1.33490400  | C             | 6.15180900  | -2.16393000 | -0.87396500 |
| C | -1.13202800 | 4.63247200  | 0.43388200  | H             | 6.95915700  | -2.64594300 | -1.43047400 |
| C | -0.15140800 | 4.41255000  | 1.40743000  | C             | 6.40314000  | -1.60172300 | 0.32801000  |
| C | -0.15597600 | -4.94987300 | -1.71092600 | H             | 7.39315600  | -1.60447100 | 0.78241400  |
| C | 0.96305400  | -4.09966100 | 0.28781200  | N             | 4.09371500  | -0.94246800 | 0.47556400  |
| H | -0.36859800 | 4.65375200  | 2.45197600  | C             | 5.35911600  | -0.93751900 | 1.10639800  |
| C | -0.12832700 | -4.71307200 | -0.33718400 | N             | 3.09863600  | -0.27834800 | 1.14232900  |
| H | -0.98862400 | -5.00256700 | 0.27313700  | C             | 2.22478900  | -0.93863900 | 2.04586200  |
| C | -1.34466300 | -5.59281500 | -2.37598100 | C             | 1.43507400  | 0.02556500  | 2.57697800  |
| H | -1.04217000 | -6.46180600 | -2.97946400 | C             | 1.76072500  | 1.30944500  | 1.93193400  |
| H | -2.08200300 | -5.93344600 | -1.63625000 | C             | 2.91637100  | 1.04376100  | 1.11746500  |
| H | -1.84150400 | -4.88359500 | -3.05620600 | O             | 1.58467400  | 1.34438300  | -1.47690500 |
| C | 0.92467700  | -3.85222300 | 1.77365000  | C             | 3.81743800  | 2.00070300  | 0.47533800  |
| H | 1.53943500  | -4.57985500 | 2.32657800  | C             | 4.40540200  | 1.77399700  | -0.77957700 |
| H | 1.29223500  | -2.84163300 | 1.98692900  | C             | 4.13254900  | 3.16418300  | 1.19345600  |
| H | -0.10569800 | -3.93071700 | 2.14892600  | C             | 5.31913400  | 2.69161700  | -1.28529300 |
| C | 3.21947400  | -3.52236700 | -2.75350500 | H             | 4.09784800  | 0.91824200  | -1.37840000 |
| H | 3.25059700  | -2.42809400 | -2.86515700 | C             | 5.05029100  | 4.07632700  | 0.67900600  |
| H | 4.17850700  | -3.83494000 | -2.31484700 | H             | 3.68192700  | 3.33746800  | 2.17214600  |
| H | 3.13465000  | -3.96752300 | -3.75400200 | C             | 5.64916200  | 3.83652500  | -0.55642100 |
| C | -2.49525700 | 5.14851900  | 0.81574400  | H             | 5.76653500  | 2.51985500  | -2.26529500 |
| H | -3.08630300 | 4.37061000  | 1.32820800  | H             | 5.30206100  | 4.97118400  | 1.24952300  |
| H | -2.42175000 | 6.00075000  | 1.50667100  | H             | 6.36978400  | 4.54988900  | -0.96016800 |
| H | -3.06405900 | 5.46725100  | -0.06849400 | H             | 1.07489900  | 2.12049500  | -1.20385700 |
| C | 2.13164800  | 3.67121800  | 2.16403800  | H             | 1.66825900  | 2.25199800  | 2.47680700  |
| H | 2.32807300  | 2.59668300  | 2.28486700  | H             | 0.85389500  | 1.30374200  | 1.13945200  |
| H | 3.07959500  | 4.17108400  | 1.91323200  | O             | 5.49865000  | -0.40805500 | 2.18425600  |
| H | 1.77339700  | 4.06008100  | 3.12650600  | H             | 0.90165900  | 0.68542300  | -1.70400500 |
| C | 0.69158300  | 3.42562300  | -2.69217200 | C             | 0.28147900  | -0.05648800 | 3.49899100  |
| H | -0.22134000 | 3.53332900  | -3.29396800 | O             | -0.09359000 | -1.30354500 | 3.78427900  |
| H | 1.46047500  | 4.07636800  | -3.13401900 | O             | -0.25190600 | 0.92172200  | 3.95159500  |
| H | 1.04939000  | 2.38744700  | -2.75622200 | C             | -1.20716600 | -1.41558100 | 4.66389100  |
| C | -7.11266200 | -2.62427800 | -0.54600900 | H             | -0.99502900 | -0.91434600 | 5.61825000  |
| C | -4.37044100 | -2.01408200 | -0.57491700 | H             | -1.36768500 | -2.48579800 | 4.82552900  |
| C | -6.23024300 | -3.44273400 | -1.23028500 | H             | -2.09756000 | -0.95701700 | 4.21240400  |
| H | -6.59478300 | -4.32248300 | -1.76124700 | C             | 2.33485600  | -2.40852500 | 2.20906200  |
| C | -4.86448900 | -3.12963000 | -1.23986400 | H             | 3.35321200  | -2.68129000 | 2.52529900  |
| H | -4.16272500 | -3.76390400 | -1.78310600 | H             | 2.11143300  | -2.91620000 | 1.25835500  |

|   |             |             |             |               |             |             |             |
|---|-------------|-------------|-------------|---------------|-------------|-------------|-------------|
| H | 1.61524200  | -2.74390200 | 2.96112800  | C             | -3.41872000 | 4.02900000  | 0.81868300  |
| C | 4.55455700  | -2.71744100 | -2.72222000 | C             | 0.50620600  | -4.58507200 | -1.23930400 |
| C | 2.48645000  | -1.50182400 | -1.27302100 | H             | 0.13535600  | 4.32724700  | -3.62177100 |
| C | 3.27717400  | -2.65644000 | -3.25709000 | C             | -1.23412700 | -3.95555900 | 0.84970100  |
| H | 3.07427900  | -3.08247100 | -4.24047100 | H             | 1.19454900  | -4.81487000 | -2.05753500 |
| C | 2.24832000  | -2.04605400 | -2.52619800 | C             | 0.01915300  | 4.25133500  | -2.53727200 |
| H | 1.23169900  | -1.98065500 | -2.91665500 | C             | -1.36715300 | 3.72741700  | -0.62206700 |
| H | 5.36806800  | -3.19497700 | -3.27211200 | H             | -3.08349000 | 5.04662200  | 1.02751400  |
| H | 1.65965300  | -1.03783600 | -0.73608300 | C             | 0.84221700  | -4.97043300 | 0.06168600  |
| P | -1.26196700 | 0.13197000  | -0.40814900 | C             | -0.04283800 | -4.64830900 | 1.09077100  |
| O | -0.56640500 | 0.91668500  | 0.67326500  | C             | 1.10616700  | 4.54438900  | -1.71315800 |
| O | -0.50418500 | -0.54742300 | -1.50432700 | C             | -0.29354900 | 4.05628000  | 0.23295900  |
| H | -6.94055400 | -1.03241900 | -2.63494300 | H             | 0.19904300  | -4.93949000 | 2.11710500  |
| H | -7.42560100 | -1.30305300 | -0.95280800 | C             | 0.92375100  | 4.45390500  | -0.32966300 |
| H | -5.78726800 | -3.63377300 | -2.40716500 | H             | 1.76266200  | 4.68832300  | 0.33221700  |
| C | -6.59372000 | -0.96665700 | -1.59396800 | C             | 2.45247700  | 4.86920600  | -2.29836800 |
| C | -5.06628400 | -3.07775400 | -1.80487700 | H             | 3.06421800  | 5.46197500  | -1.60395700 |
| H | -6.93062000 | 1.11221900  | -0.88789600 | H             | 2.99572600  | 3.93410000  | -2.51063200 |
| C | -6.12049600 | 0.43963600  | -1.20345200 | H             | 2.35866000  | 5.42256800  | -3.24337100 |
| C | -5.35801000 | -1.79817100 | -1.34566800 | C             | -0.42003900 | 3.94977300  | 1.73077000  |
| H | -5.60243300 | 0.90597400  | -2.05575800 | H             | -1.13618200 | 4.67837700  | 2.13570800  |
| C | -3.83119700 | -3.63720500 | -1.48718700 | H             | -0.76837700 | 2.94698300  | 2.02122300  |
| H | -3.58742000 | -4.64742200 | -1.82346400 | H             | 0.54727200  | 4.15184700  | 2.21226700  |
| H | -6.70432600 | -0.62481500 | 1.19577000  | C             | -2.34780300 | 3.53762300  | -2.96162200 |
| H | -7.10424900 | 1.80343500  | 1.30975200  | H             | -2.47667800 | 2.45007400  | -3.06554200 |
| C | -4.44105400 | -1.09057500 | -0.55769400 | H             | -3.29954200 | 3.94703600  | -2.59322400 |
| C | -5.08051400 | 0.20030300  | -0.07163400 | H             | -2.14979700 | 3.95820300  | -3.95656100 |
| C | -5.82030500 | 0.02293600  | 1.28318600  | C             | 2.13555400  | -5.69399500 | 0.33323300  |
| C | -6.14400000 | 1.45950700  | 1.72867500  | H             | 2.33725900  | -5.76590100 | 1.41111000  |
| C | -2.86444600 | -2.92967700 | -0.75915400 | H             | 2.11230900  | -6.71753200 | -0.07243500 |
| C | -3.18269200 | -1.63916700 | -0.30207700 | H             | 2.98296100  | -5.17684900 | -0.14366800 |
| C | -4.29885400 | 1.46815400  | 0.21418300  | C             | -2.15385500 | -3.62005100 | 1.99358700  |
| C | -4.99003700 | 2.24643100  | 1.15000000  | H             | -2.15776900 | -2.53427300 | 2.17114000  |
| H | -5.12539800 | -0.44069700 | 2.00084000  | H             | -3.19007600 | -3.92075200 | 1.77791900  |
| O | -2.36948000 | 1.10912600  | -1.13996100 | H             | -1.83195000 | -4.12751200 | 2.91310500  |
| H | -6.21291000 | 1.56490700  | 2.82071500  | C             | -0.97441900 | -3.45866700 | -2.93415500 |
| C | -3.11364500 | 1.94031600  | -0.33964400 | H             | -0.15161100 | -3.73187300 | -3.60963400 |
| C | -0.67542200 | -3.89845900 | -1.52448900 | H             | -1.89369200 | -3.91616200 | -3.32602600 |
| C | -1.55406200 | -3.58334000 | -0.46783300 | H             | -1.11250200 | -2.36604000 | -2.95114800 |
| C | -4.56625000 | 3.53816100  | 1.44263800  |               |             |             |             |
| O | -2.25221200 | -0.90896100 | 0.39799700  | <b>TS3-Ss</b> |             |             |             |
| C | -1.21468500 | 3.84560600  | -2.01830000 | C             | 7.01216100  | 0.68027200  | 0.38298100  |
| C | -2.65315500 | 3.23644400  | -0.04643200 | C             | 5.73502800  | 0.16130900  | 0.67623000  |
| H | -5.11306300 | 4.15819500  | 2.15562100  | C             | 7.10336900  | 1.88774100  | -0.40546800 |

|   |             |             |             |   |             |             |             |
|---|-------------|-------------|-------------|---|-------------|-------------|-------------|
| H | 8.09751800  | 2.27249100  | -0.64393500 | C | -6.69746400 | -1.68030800 | -1.57348000 |
| C | 6.00225300  | 2.53971700  | -0.83043000 | C | -4.92567400 | -3.60818100 | -1.54419900 |
| H | 6.04812400  | 3.46124400  | -1.40961600 | H | -7.30481900 | 0.38989300  | -1.04217800 |
| N | 4.61655700  | 0.83221100  | 0.15715200  | C | -6.40533000 | -0.20978000 | -1.24235600 |
| C | 4.65496100  | 2.06925600  | -0.51497100 | C | -5.40761000 | -2.35701900 | -1.17476900 |
| N | 3.38366300  | 0.30471700  | 0.45500300  | H | -5.86377800 | 0.25657200  | -2.07989800 |
| C | 2.68195200  | 0.64758400  | 1.64049000  | C | -3.65565700 | -3.99124600 | -1.11729100 |
| C | 1.59197200  | -0.15514700 | 1.67981800  | H | -3.25951300 | -4.96769100 | -1.40443300 |
| C | 1.55673100  | -0.98305100 | 0.46527500  | H | -7.09625700 | -1.14969600 | 1.17859800  |
| C | 2.73043800  | -0.60486300 | -0.27381000 | H | -7.69836800 | 1.23913600  | 1.10393000  |
| O | 1.03628200  | 1.54540100  | -0.94127200 | C | -4.65026900 | -1.51529600 | -0.35234900 |
| C | 3.10034200  | -1.06318300 | -1.61373400 | C | -5.45028800 | -0.26557300 | -0.01591800 |
| C | 2.05226600  | -1.14535300 | -2.54658700 | C | -6.27800500 | -0.42358800 | 1.28902500  |
| C | 4.40899500  | -1.40585000 | -1.98846900 | C | -6.75174000 | 1.00233700  | 1.61757300  |
| C | 2.32640000  | -1.56058800 | -3.84720400 | C | -2.84161100 | -3.14432200 | -0.35059300 |
| H | 1.04305100  | -0.84263700 | -2.25272800 | C | -3.36793100 | -1.89953700 | 0.04257700  |
| C | 4.66288500  | -1.83435400 | -3.28761500 | C | -4.80691600 | 1.08822900  | 0.23425100  |
| H | 5.22456400  | -1.37703600 | -1.26577300 | C | -5.62074400 | 1.85027100  | 1.08101000  |
| C | 3.62511000  | -1.90765500 | -4.21798300 | H | -5.60614800 | -0.78343300 | 2.08360200  |
| H | 1.51520000  | -1.60726000 | -4.57524400 | O | -2.75247800 | 0.82286300  | -0.94978400 |
| H | 5.67758200  | -2.11483700 | -3.57328400 | H | -6.91969200 | 1.16205200  | 2.69212900  |
| H | 3.83157800  | -2.23624100 | -5.23802400 | C | -3.62656200 | 1.63401300  | -0.26356600 |
| H | 1.68357600  | 2.25827600  | -0.88184800 | C | -0.50902500 | -3.77147200 | -1.04170600 |
| H | 1.37645500  | -2.06791700 | 0.57021200  | C | -1.45286500 | -3.57937800 | -0.00567300 |
| H | 0.58566300  | -0.76580100 | -0.21843700 | C | -5.30924400 | 3.17889100  | 1.35111400  |
| O | 3.63443400  | 2.66174900  | -0.78728400 | O | -2.61683800 | -1.02259800 | 0.78484900  |
| H | 0.37572100  | 1.73682600  | -0.25498000 | C | -1.77417400 | 3.67710100  | -1.88290400 |
| C | 0.52044200  | -0.24047500 | 2.70126800  | C | -3.27913300 | 2.97020500  | 0.00581500  |
| O | 0.40534500  | 0.86143300  | 3.43788400  | H | -5.94583100 | 3.78110600  | 2.00259600  |
| O | -0.15248700 | -1.22540000 | 2.84958400  | C | -4.15563300 | 3.73002400  | 0.79167200  |
| C | -0.77521600 | 0.92888600  | 4.22795100  | C | 0.77011900  | -4.22443800 | -0.71893800 |
| H | -0.77848600 | 0.14257100  | 4.99564900  | H | -0.41175100 | 4.34163200  | -3.40736900 |
| H | -0.77704600 | 1.91785800  | 4.69827100  | C | -1.09318200 | -3.83428400 | 1.32749600  |
| H | -1.65025800 | 0.80810600  | 3.57395700  | H | 1.50249700  | -4.35796500 | -1.52140400 |
| C | 3.20437900  | 1.73538200  | 2.50780200  | C | -0.58094800 | 4.25270800  | -2.33084500 |
| H | 4.25356700  | 1.55601300  | 2.78830800  | C | -2.00176400 | 3.55868400  | -0.49849000 |
| H | 3.14541600  | 2.69773800  | 1.97562600  | H | -3.89962800 | 4.77212900  | 0.99397300  |
| H | 2.59267700  | 1.79986500  | 3.41226800  | C | 1.14759900  | -4.49022100 | 0.60433500  |
| P | -1.64741000 | 0.04305100  | -0.01250400 | C | 0.20500500  | -4.28439600 | 1.60934200  |
| O | -1.06606000 | 0.96418900  | 1.00773500  | C | 0.39568600  | 4.70975000  | -1.44806300 |
| O | -0.74720100 | -0.71326400 | -0.96016100 | C | -1.02648900 | 4.01508000  | 0.41511600  |
| H | -6.94673200 | -1.84276000 | -2.63159900 | H | 0.47964600  | -4.46827100 | 2.65131900  |
| H | -7.54174300 | -2.06571300 | -0.97775500 | C | 0.15319000  | 4.57777800  | -0.07781300 |
| H | -5.52057200 | -4.27257900 | -2.17406000 | H | 0.91096700  | 4.92053900  | 0.63374600  |

|               |             |             |             |   |             |             |             |
|---------------|-------------|-------------|-------------|---|-------------|-------------|-------------|
| C             | 1.69402000  | 5.28686600  | -1.94685600 | C | -1.78428600 | -0.01087900 | 1.73019100  |
| H             | 1.62623800  | 5.56343100  | -3.00786800 | C | -1.48945300 | -0.70163500 | 0.46674900  |
| H             | 1.97729600  | 6.18246200  | -1.37429200 | C | -2.65972300 | -0.51735100 | -0.35777300 |
| H             | 2.50924100  | 4.55455000  | -1.83743400 | O | -1.53288400 | 1.58112800  | -1.95714900 |
| C             | -1.21638700 | 3.88676000  | 1.90542600  | C | -2.84782900 | -1.09894200 | -1.68617700 |
| H             | -1.83148000 | 4.70602900  | 2.31040600  | C | -1.67690200 | -1.36519500 | -2.41811900 |
| H             | -1.70101100 | 2.93279600  | 2.14544300  | C | -4.09552500 | -1.43940300 | -2.22874500 |
| H             | -0.24260600 | 3.91854200  | 2.41483300  | C | -1.75793900 | -1.95573600 | -3.67208200 |
| C             | -2.78690200 | 3.19696400  | -2.88916800 | H | -0.70766300 | -1.06482400 | -2.01442500 |
| H             | -2.77945100 | 2.09819400  | -2.94460100 | C | -4.16514000 | -2.04070000 | -3.48340000 |
| H             | -3.80666100 | 3.50541300  | -2.61584300 | H | -5.01733900 | -1.27169200 | -1.67516500 |
| H             | -2.56053100 | 3.59320700  | -3.88816400 | C | -3.00159000 | -2.29743000 | -4.20655100 |
| C             | 2.54920700  | -4.94789000 | 0.91494300  | H | -0.84340300 | -2.14453800 | -4.23605500 |
| H             | 2.70012300  | -5.07489000 | 1.99550800  | H | -5.13834600 | -2.31175100 | -3.89450900 |
| H             | 2.77262500  | -5.90758800 | 0.42440600  | H | -3.06458800 | -2.76262900 | -5.19174900 |
| H             | 3.29230200  | -4.22125600 | 0.54708600  | H | -1.98133000 | 2.17775300  | -1.34346700 |
| C             | -2.07069300 | -3.61934900 | 2.45031700  | H | -1.00256100 | -1.68754200 | 0.48013700  |
| H             | -2.22479000 | -2.54186700 | 2.60456600  | H | -0.63527000 | -0.03671100 | -0.07201000 |
| H             | -3.04491800 | -4.07977200 | 2.22815000  | O | -3.72231200 | 2.72448200  | -0.64257400 |
| H             | -1.68744300 | -4.04499800 | 3.38761000  | H | -0.64061400 | 1.47490700  | -1.58799000 |
| C             | -0.84752200 | -3.45376800 | -2.47488000 | C | -0.90354200 | -0.05072500 | 2.93921200  |
| H             | 0.05880800  | -3.47527700 | -3.09601400 | O | -0.33258700 | 1.12303100  | 3.17103300  |
| H             | -1.56201500 | -4.17410600 | -2.89995900 | O | -0.78984700 | -1.02443400 | 3.63026100  |
| H             | -1.29815900 | -2.45292900 | -2.53767700 | C | 0.69153000  | 1.12106500  | 4.15829900  |
| C             | 8.14674900  | 0.00963200  | 0.87028300  | H | 0.30609200  | 0.75956900  | 5.12143200  |
| C             | 5.60137700  | -1.00217300 | 1.44788100  | H | 1.03209200  | 2.15772100  | 4.24906800  |
| C             | 8.01907200  | -1.14126500 | 1.63015600  | H | 1.50968400  | 0.47272900  | 3.81610500  |
| H             | 8.90490600  | -1.65474500 | 2.00418800  | C | -3.72060500 | 1.54540100  | 2.50078500  |
| C             | 6.74243400  | -1.63961300 | 1.91748700  | H | -4.72515100 | 1.15726900  | 2.72829100  |
| H             | 6.63269400  | -2.54319200 | 2.51875000  | H | -3.82125000 | 2.53755100  | 2.03622200  |
| H             | 9.13237100  | 0.41752400  | 0.63789700  | H | -3.16658100 | 1.66438800  | 3.43964500  |
| H             | 4.61593700  | -1.40592500 | 1.68240200  | C | -8.25417900 | -0.26555200 | 0.11411000  |
|               |             |             |             | C | -5.75400900 | -1.21699300 | 0.94198500  |
|               |             |             |             | C | -8.16578400 | -1.46633700 | 0.79889200  |
|               |             |             |             | H | -9.06479900 | -2.04236800 | 1.01860000  |
|               |             |             |             | C | -6.91225100 | -1.93320500 | 1.21417700  |
|               |             |             |             | H | -6.83465500 | -2.87394500 | 1.76095900  |
|               |             |             |             | H | -9.22155800 | 0.11960900  | -0.21388200 |
|               |             |             |             | H | -4.78627300 | -1.59634500 | 1.27111600  |
|               |             |             |             | P | 1.71906600  | 0.00041500  | 0.30199900  |
|               |             |             |             | O | 1.30927500  | -0.63974600 | 1.57787600  |
|               |             |             |             | O | 0.66116200  | 0.59820600  | -0.60999600 |
|               |             |             |             | H | 6.59811900  | 0.86795200  | -3.50102100 |
|               |             |             |             | H | 7.52342300  | 1.21487800  | -2.03132700 |
| <b>TS3-Rr</b> |             |             |             |   |             |             |             |
| C             | -7.10181500 | 0.48634200  | -0.17140100 |   |             |             |             |
| C             | -5.84765100 | -0.00544700 | 0.24294600  |   |             |             |             |
| C             | -7.15456800 | 1.75405600  | -0.86320000 |   |             |             |             |
| H             | -8.12802000 | 2.11444800  | -1.20314800 |   |             |             |             |
| C             | -6.04602300 | 2.49329500  | -1.07218800 |   |             |             |             |
| H             | -6.06735000 | 3.46433000  | -1.56540200 |   |             |             |             |
| N             | -4.70910600 | 0.74369600  | -0.09063000 |   |             |             |             |
| C             | -4.73188000 | 2.05455400  | -0.61106400 |   |             |             |             |
| N             | -3.48934100 | 0.27389500  | 0.33093100  |   |             |             |             |
| C             | -2.96701400 | 0.62666900  | 1.60855900  |   |             |             |             |

|   |             |             |             |               |             |             |             |
|---|-------------|-------------|-------------|---------------|-------------|-------------|-------------|
| H | 5.59174200  | 3.51934900  | -3.14197400 | H             | -1.14338800 | -4.19360300 | 2.12206900  |
| C | 6.54282500  | 0.87378400  | -2.40325800 | C             | -2.46287700 | -4.75518500 | -0.20066100 |
| C | 5.04679100  | 3.02105000  | -2.33770800 | H             | -3.12580100 | -4.14704200 | 0.43385000  |
| H | 7.01467300  | -1.17519600 | -1.68671200 | H             | -2.78670500 | -4.64110800 | -1.24482900 |
| C | 6.16312200  | -0.49157400 | -1.81240800 | H             | -2.61788000 | -5.80730600 | 0.08660200  |
| C | 5.43476600  | 1.76254800  | -1.88899400 | C             | 1.32875400  | -3.43579600 | 2.83043800  |
| H | 5.42466700  | -0.98344700 | -2.46449300 | H             | 1.93410700  | -4.27179000 | 3.21527900  |
| C | 3.93259400  | 3.62845700  | -1.76119000 | H             | 1.93925300  | -2.52472500 | 2.84033100  |
| H | 3.60901200  | 4.61234400  | -2.10672600 | H             | 0.48140700  | -3.27867800 | 3.50919800  |
| H | 7.39690400  | 0.68523900  | 0.25984000  | C             | 2.01678400  | -3.64604800 | -2.21061300 |
| H | 7.75569500  | -1.74573700 | 0.44548400  | H             | 2.17907200  | -2.58034800 | -2.43392600 |
| C | 4.75037200  | 1.13085200  | -0.84248600 | H             | 3.00733400  | -4.10315100 | -2.07128600 |
| C | 5.47299000  | -0.15346400 | -0.45998600 | H             | 1.53985200  | -4.11405700 | -3.08269000 |
| C | 6.55563300  | 0.08226900  | 0.63039000  | C             | -1.86008500 | 5.19628600  | 1.12622400  |
| C | 6.95709900  | -1.33203700 | 1.08330500  | H             | -2.69912600 | 4.72073300  | 0.59860200  |
| C | 3.17707100  | 2.98975600  | -0.76956700 | H             | -1.98904900 | 5.03944900  | 2.20654900  |
| C | 3.60912400  | 1.73199000  | -0.31154800 | H             | -1.92041000 | 6.28056400  | 0.93922900  |
| C | 4.77376900  | -1.37234600 | 0.11869700  | C             | 2.90733000  | 3.83337400  | 2.04835000  |
| C | 5.67032100  | -2.10564100 | 0.90597600  | H             | 3.07481800  | 2.77466100  | 2.29722700  |
| H | 6.09108600  | 0.62235600  | 1.46990700  | H             | 3.84562400  | 4.21966600  | 1.62331500  |
| O | 2.54959200  | -1.03410300 | -0.67678600 | H             | 2.70022500  | 4.38135600  | 2.97783800  |
| H | 7.32285300  | -1.36333300 | 2.11941600  | C             | 0.93868600  | 3.33160900  | -2.61211300 |
| C | 3.47332900  | -1.83621500 | -0.05140100 | H             | -0.05573700 | 3.27958100  | -3.07077300 |
| C | 0.82943100  | 3.75227000  | -1.16762400 | H             | 1.55958100  | 4.02708200  | -3.19638900 |
| C | 1.90564200  | 3.59305700  | -0.27102800 | H             | 1.39936400  | 2.33546000  | -2.68983400 |
| C | 5.30264500  | -3.33955100 | 1.43298300  |               |             |             |             |
| O | 2.89221700  | 1.08511400  | 0.66318600  | <b>TS3-Rs</b> |             |             |             |
| C | 1.15841800  | -3.80574100 | -0.98268800 | C             | 5.79516800  | 1.83656400  | -0.74019700 |
| C | 3.07222400  | -3.07702200 | 0.47552200  | C             | 4.56765500  | 1.25727000  | -0.35998500 |
| H | 6.00124400  | -3.91734300 | 2.04131800  | C             | 6.98979000  | 1.47811900  | -0.01307400 |
| C | 4.01530200  | -3.82343300 | 1.19226900  | H             | 7.93010800  | 1.94876600  | -0.30964400 |
| C | -0.37760800 | 4.27010300  | -0.69064300 | C             | 6.96935700  | 0.58437800  | 0.99821800  |
| H | -0.56656000 | -4.39528500 | -2.12835400 | H             | 7.86357700  | 0.29447800  | 1.54884800  |
| C | 1.76550600  | 3.97612700  | 1.07589400  | N             | 4.58947200  | 0.34569000  | 0.70972300  |
| H | -1.21828400 | 4.37165300  | -1.38302500 | C             | 5.73764000  | -0.08181300 | 1.40921900  |
| C | -0.17640300 | -4.20277000 | -1.12527000 | N             | 3.42262600  | -0.28856600 | 1.06422500  |
| C | 1.66489600  | -3.54955500 | 0.30630600  | C             | 2.66095500  | 0.07251100  | 2.21349100  |
| H | 3.71253200  | -4.79025000 | 1.59946100  | C             | 1.54613800  | -0.69281000 | 2.17330500  |
| C | -0.54618000 | 4.63750600  | 0.64637300  | C             | 1.56884800  | -1.52613800 | 0.95502800  |
| C | 0.54011200  | 4.49104100  | 1.51022500  | C             | 2.84592000  | -1.24260600 | 0.34604800  |
| C | -1.02236600 | -4.34993400 | -0.02582200 | O             | 1.33303600  | 2.18083100  | 1.01487900  |
| C | 0.83322000  | -3.71139800 | 1.43552600  | C             | 3.39720700  | -1.76943600 | -0.90189200 |
| H | 0.43166000  | 4.78158800  | 2.55913600  | C             | 2.57468700  | -1.77177700 | -2.03681200 |
| C | -0.49476100 | -4.10493100 | 1.24566300  | C             | 4.71605700  | -2.24088200 | -0.96680800 |

|   |             |             |             |   |             |             |             |
|---|-------------|-------------|-------------|---|-------------|-------------|-------------|
| C | 3.09444000  | -2.22175600 | -3.24842300 | C | -2.62027500 | -3.10285100 | -0.76088400 |
| H | 1.54944500  | -1.39481400 | -1.96325700 | C | -3.13738600 | -1.87052600 | -0.32593300 |
| C | 5.21164200  | -2.71231600 | -2.17832500 | C | -4.56446800 | 1.11414400  | 0.04765900  |
| H | 5.33071400  | -2.27040200 | -0.06425700 | C | -5.47248800 | 1.79589500  | 0.86744300  |
| C | 4.40530000  | -2.69312800 | -3.31850300 | H | -5.53112800 | -0.93399200 | 1.60132600  |
| H | 2.46894900  | -2.20527300 | -4.14225100 | O | -2.38033300 | 0.96679100  | -0.91989500 |
| H | 6.23121600  | -3.09567100 | -2.23386400 | H | -6.89565200 | 0.94925900  | 2.28432500  |
| H | 4.80278200  | -3.05210600 | -4.26931800 | C | -3.34962100 | 1.70929900  | -0.28445700 |
| H | 1.06267200  | 2.86671300  | 0.39310600  | C | -0.26789400 | -3.84911500 | -1.20100200 |
| H | 1.26556400  | -2.58256300 | 1.02599900  | C | -1.31930800 | -3.65909500 | -0.28049700 |
| H | 0.78927000  | -1.12132900 | 0.17436600  | C | -5.22556000 | 3.10708800  | 1.25923600  |
| O | 5.64340900  | -0.94097800 | 2.25836300  | O | -2.45070700 | -1.09804500 | 0.57532800  |
| H | 0.49098500  | 1.71568500  | 1.21486300  | C | -1.56748000 | 3.96275300  | -1.70117800 |
| C | 0.36090900  | -0.70684100 | 3.06223800  | C | -3.08860400 | 3.04264000  | 0.07637800  |
| O | 0.25390800  | 0.38200700  | 3.81663400  | H | -5.93502600 | 3.64672200  | 1.88950000  |
| O | -0.42042500 | -1.62142500 | 3.07617900  | C | -4.05219700 | 3.72640500  | 0.82970200  |
| C | -0.99250500 | 0.53066300  | 4.48526900  | C | 0.90121200  | -4.48746600 | -0.77679100 |
| H | -1.14139700 | -0.27403900 | 5.21854000  | H | -0.22377600 | 4.85188800  | -3.12523400 |
| H | -0.95570800 | 1.50169700  | 4.99020700  | C | -1.17858800 | -4.09091200 | 1.05175900  |
| H | -1.80311100 | 0.51041000  | 3.74403000  | H | 1.71473600  | -4.63115900 | -1.49430500 |
| C | 3.16891200  | 1.13374600  | 3.11453100  | C | -0.42757000 | 4.68757300  | -2.06346500 |
| H | 3.26005800  | 2.06959200  | 2.54641400  | C | -1.83691000 | 3.74501600  | -0.33360200 |
| H | 2.44874200  | 1.28944800  | 3.92279100  | H | -3.85400200 | 4.76522600  | 1.10195600  |
| H | 4.14312200  | 0.84518800  | 3.53559600  | C | 1.05803300  | -4.93805300 | 0.53799100  |
| P | -1.40432200 | 0.05735400  | 0.05054600  | C | 0.01034300  | -4.72268000 | 1.43660100  |
| O | -1.00900000 | 0.82795700  | 1.27263800  | C | 0.44645800  | 5.21629100  | -1.11070200 |
| O | -0.36271000 | -0.55171900 | -0.85373300 | C | -0.95692300 | 4.25085000  | 0.64447900  |
| H | -6.43516700 | -1.44337400 | -3.30910900 | H | 0.11622600  | -5.05413300 | 2.47306100  |
| H | -7.19539600 | -1.83429900 | -1.75783300 | C | 0.16045400  | 4.98914500  | 0.23746800  |
| H | -5.12115500 | -3.96719600 | -2.94646100 | H | 0.84637000  | 5.36836700  | 1.00056100  |
| C | -6.29147200 | -1.40363900 | -2.22010100 | C | 1.65612100  | 6.01780700  | -1.51539800 |
| C | -4.57514100 | -3.38079200 | -2.20502000 | H | 1.89969300  | 5.86730900  | -2.57621600 |
| H | -6.92788300 | 0.60439100  | -1.51538600 | H | 1.48245900  | 7.09470400  | -1.36286600 |
| C | -6.01872700 | 0.01472400  | -1.70038900 | H | 2.53591600  | 5.74070000  | -0.91646500 |
| C | -5.05662200 | -2.14949600 | -1.77351500 | C | -1.15608900 | 3.96118400  | 2.11100300  |
| H | -5.39965400 | 0.56278500  | -2.42772900 | H | -1.52973600 | 2.93690700  | 2.24587400  |
| C | -3.37347700 | -3.84956500 | -1.67947000 | H | -0.20070900 | 4.05389300  | 2.64498800  |
| H | -2.98341300 | -4.81830700 | -1.99966600 | H | -1.87516700 | 4.65582500  | 2.57262400  |
| H | -6.92723200 | -1.19484400 | 0.52547600  | C | -2.48547700 | 3.43717300  | -2.77339500 |
| H | -7.53828900 | 1.18616800  | 0.65151600  | H | -2.42191600 | 2.34065600  | -2.83436700 |
| C | -4.36474700 | -1.41302400 | -0.80614800 | H | -3.53454200 | 3.69235900  | -2.56185600 |
| C | -5.18049100 | -0.19671400 | -0.40624800 | H | -2.21849100 | 3.85443500  | -3.75343400 |
| C | -6.12688700 | -0.48882700 | 0.78945700  | C | 2.34711000  | -5.57399700 | 0.98778900  |
| C | -6.63692500 | 0.89735400  | 1.21715600  | H | 2.17202000  | -6.33631100 | 1.75968600  |



|   |             |             |             |   |             |             |             |
|---|-------------|-------------|-------------|---|-------------|-------------|-------------|
| H | 2.87502100  | -6.04581200 | 0.14751700  | C | 3.10112500  | 0.61803600  | 0.52108500  |
| H | 3.02596500  | -4.82126700 | 1.42260200  | C | 1.85921600  | 1.08933400  | 0.06690600  |
| C | -2.28600700 | -3.88971700 | 2.04935500  | C | -1.17530500 | 2.42431600  | -0.40733000 |
| H | -2.39864100 | -2.81866600 | 2.26882700  | C | -1.87420600 | 3.27222800  | -1.27492500 |
| H | -3.24448600 | -4.26608300 | 1.66074100  | H | 0.86260600  | 3.41285700  | -1.96544900 |
| H | -2.06180100 | -4.40775700 | 2.99111700  | O | -0.95880100 | 0.29319300  | 0.64545400  |
| C | -0.38330400 | -3.35299800 | -2.61906700 | H | -1.05535000 | 4.69384500  | -2.71001400 |
| H | 0.56415200  | -3.49636600 | -3.15502200 | C | -1.73182100 | 1.20112100  | -0.05870100 |
| H | -1.16763600 | -3.88166600 | -3.17888100 | C | 3.81938200  | -1.74933500 | 0.96642600  |
| H | -0.64355100 | -2.28303300 | -2.61617700 | C | 3.65502100  | -0.68768000 | 0.05400100  |
| C | 5.81654700  | 2.73935700  | -1.81829900 | C | -3.15682000 | 2.94060400  | -1.70097900 |
| C | 3.38825400  | 1.56852600  | -1.04893700 | O | 1.12506000  | 0.30067800  | -0.80584300 |
| C | 4.65507000  | 3.04673900  | -2.50523500 | C | -3.84326900 | -0.75741800 | 1.28553800  |
| H | 4.67919400  | 3.74211000  | -3.34473000 | C | -3.02183500 | 0.83469800  | -0.47281600 |
| C | 3.44545900  | 2.45665200  | -2.11381500 | H | -3.71090700 | 3.60222200  | -2.36945500 |
| H | 2.52285200  | 2.69406300  | -2.64622900 | C | -3.72826000 | 1.73987900  | -1.27463200 |
| H | 6.77030500  | 3.18694000  | -2.10435600 | C | 4.35591500  | -2.95467000 | 0.50929200  |
| H | 2.43000600  | 1.16487600  | -0.72607400 | H | -4.55978000 | -2.21104700 | 2.70357500  |

**CPA-H<sub>2</sub>O**

|   |             |             |             |   |             |             |             |
|---|-------------|-------------|-------------|---|-------------|-------------|-------------|
| O | -1.40153800 | -3.21834200 | 0.67195300  | C | 4.03568600  | -0.84558700 | -1.29173800 |
| H | -1.52139800 | -2.95709500 | -0.25897900 | H | 4.47288600  | -3.78055200 | 1.21661600  |
| H | -0.00755500 | -2.36365500 | 0.96817600  | C | -4.36389900 | -2.00703700 | 1.64734900  |
| H | -2.19879500 | -2.87505200 | 1.10572100  | C | -3.59796800 | -0.48468700 | -0.07484300 |
| P | -0.02798700 | -0.67966900 | -0.26846800 | H | -4.73827300 | 1.47553900  | -1.59395700 |
| O | -0.73806800 | -1.34269100 | -1.37889700 | C | 4.73827300  | -3.13648000 | -0.82238500 |
| O | 0.62968000  | -1.59908000 | 0.82491600  | C | 4.57390700  | -2.06846400 | -1.70494700 |
| H | 1.30331000  | 4.46523400  | 2.91768200  | C | -4.64448800 | -2.99212800 | 0.69623500  |
| H | 1.68514000  | 5.18434300  | 1.34470900  | C | -3.88766400 | -1.45893500 | -1.05402300 |
| H | 3.84688200  | 3.20317500  | 2.64105400  | H | 4.87439800  | -2.18592800 | -2.74950400 |
| C | 1.27548200  | 4.28523300  | 1.83400700  | C | -4.40097100 | -2.69428200 | -0.64793500 |
| C | 3.29276800  | 2.61887800  | 1.90408800  | H | -4.60620200 | -3.45335500 | -1.40758400 |
| H | -0.74463100 | 4.84389500  | 1.10063300  | C | -5.13525100 | -4.35437100 | 1.10677500  |
| C | -0.13152400 | 3.95716000  | 1.31505800  | H | -5.85136600 | -4.75797200 | 0.37771400  |
| C | 2.05888800  | 3.05735100  | 1.43474800  | H | -4.29193000 | -5.06113200 | 1.16611900  |
| H | -0.66600300 | 3.34447500  | 2.05763600  | H | -5.61931100 | -4.32741500 | 2.09226600  |
| C | 3.81027100  | 1.41468100  | 1.42881700  | C | -3.63271300 | -1.20433300 | -2.51654800 |
| H | 4.78283200  | 1.06275000  | 1.77849000  | H | -3.69677600 | -2.14187300 | -3.08484000 |
| H | 1.05690000  | 4.84587300  | -0.92584300 | H | -4.36975000 | -0.50532700 | -2.93934100 |
| H | -1.34400900 | 5.36291500  | -1.09614300 | H | -2.63129900 | -0.77849300 | -2.66036400 |
| C | 1.34873900  | 2.31664300  | 0.48017400  | C | -3.55996000 | 0.26785600  | 2.35245800  |
| C | 0.11151100  | 3.09035600  | 0.04583400  | H | -2.47599800 | 0.39428400  | 2.49535800  |
| C | 0.38500900  | 4.01239700  | -1.17506600 | H | -3.97073100 | 1.25108900  | 2.08054200  |
| C | -1.01319500 | 4.46108500  | -1.63683000 | H | -3.99769700 | -0.03789300 | 3.31183600  |
|   |             |             |             | C | 3.87857500  | 0.27705100  | -2.28443700 |
|   |             |             |             | H | 2.81689800  | 0.44004400  | -2.52450300 |

|   |            |             |             |
|---|------------|-------------|-------------|
| H | 4.27448300 | 1.22358900  | -1.88754300 |
| H | 4.40688500 | 0.04687100  | -3.21899300 |
| C | 5.28697700 | -4.45919200 | -1.28836400 |
| H | 6.01608500 | -4.86345200 | -0.57146600 |
| H | 4.48080300 | -5.20276800 | -1.38893100 |
| H | 5.77926900 | -4.36668300 | -2.26580100 |
| C | 3.41717100 | -1.61180800 | 2.41280800  |
| H | 3.35442500 | -2.59938400 | 2.88973500  |
| H | 4.14513800 | -1.01330000 | 2.98190900  |
| H | 2.43937400 | -1.12066900 | 2.50471200  |

## (7) NCI and topology analyses of TS1 and TS2

Summary of distances, types of interaction, electron densities ( $\rho_{\text{bcp}}$ ), Lagrangian kinetic energies ( $G_{\text{b}}$ ), potential energy densities ( $V_{\text{b}}$ ), energy densities ( $H_{\text{b}}$ ), and Laplacian of electron densities ( $\nabla_{2\rho}$ ) at the bond critical points (BCPs) along the bond paths in TS1R (bond lengths in Å, other values in a.u.).

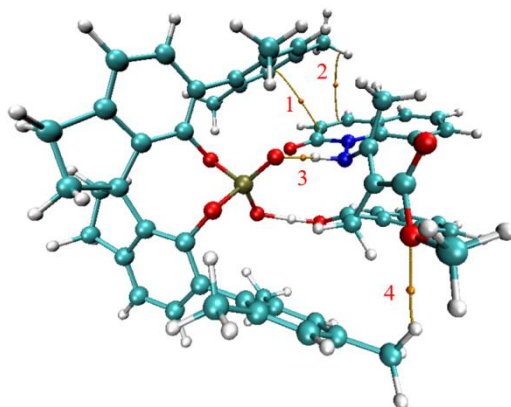

**TS1-Ss**

| Entry | Type of interaction | Distance | $\rho_{\text{bcp}} \times 10^{-2}$ | $G_{\text{b}} \times 10^{-2}$ | $V_{\text{b}} \times 10^{-2}$ | $H_{\text{b}} \times 10^{-3}$ | $\nabla_{2\rho} \times 10^{-1}$ |
|-------|---------------------|----------|------------------------------------|-------------------------------|-------------------------------|-------------------------------|---------------------------------|
| 1     | C...C               | 3.32     | 0.6975                             | 0.4532                        | -0.3732                       | 0.8001                        | 0.2133                          |
| 2     | C-H...C             | 3.00     | 0.5675                             | 0.3731                        | -0.2840                       | 0.8906                        | 0.1848                          |
| 3     | N-H...O             | 1.79     | 0.3674                             | 0.3293                        | -0.3508                       | -0.2154                       | 0.1231                          |
| 4     | C-H...O             | 2.67     | 0.5962                             | 0.4353                        | -0.3266                       | 0.1086                        | 0.2175                          |

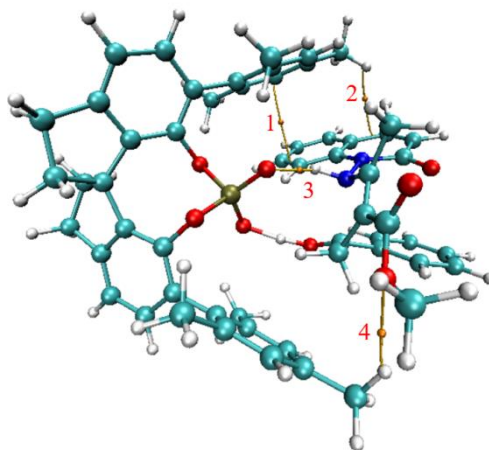

**TS1-Rs**

| Entry | Type of interaction | Distance | $\rho_{\text{bcp}} \times 10^{-2}$ | $G_{\text{b}} \times 10^{-2}$ | $V_{\text{b}} \times 10^{-2}$ | $H_{\text{b}} \times 10^{-3}$ | $\nabla_{2\rho} \times 10^{-1}$ |
|-------|---------------------|----------|------------------------------------|-------------------------------|-------------------------------|-------------------------------|---------------------------------|
| 1     | $\pi-\pi$           | 3.39     | 0.7128                             | 0.4326                        | -0.3504                       | 0.8221                        | 0.2059                          |
| 2     | C-H...C             | 2.87     | 0.6136                             | 0.4158                        | -0.3276                       | 0.8822                        | 0.2016                          |
| 3     | N-H...O             | 1.80     | 0.3561                             | 0.3250                        | -0.3373                       | -0.1229                       | 0.1250                          |
| 4     | C-H...O             | 2.63     | 0.6557                             | 0.4865                        | -0.3679                       | 0.1186                        | 0.2420                          |

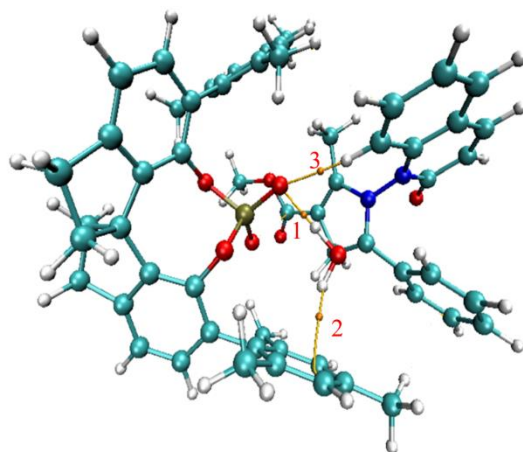

**TS2-Sr**

| Entry | Type of interaction | Distance | $\rho_{\text{bcp}} \times 10^{-2}$ | $G_{\text{b}} \times 10^{-2}$ | $V_{\text{b}} \times 10^{-2}$ | $H_{\text{b}} \times 10^{-3}$ | $\nabla_{2\rho} \times 10^{-1}$ |
|-------|---------------------|----------|------------------------------------|-------------------------------|-------------------------------|-------------------------------|---------------------------------|
| 1     | O-H $\cdots$ O      | 1.60     | 0.6071                             | 0.4893                        | -0.6775                       | -0.1881                       | 0.1204                          |
| 2     | O-H $\cdots$ C      | 2.51     | 0.1029                             | 0.7387                        | -0.5808                       | 0.1579                        | 0.3586                          |
| 3     | C-H $\cdots$ O      | 2.18     | 0.1478                             | 0.1262                        | -0.9814                       | 0.2812                        | 0.6175                          |

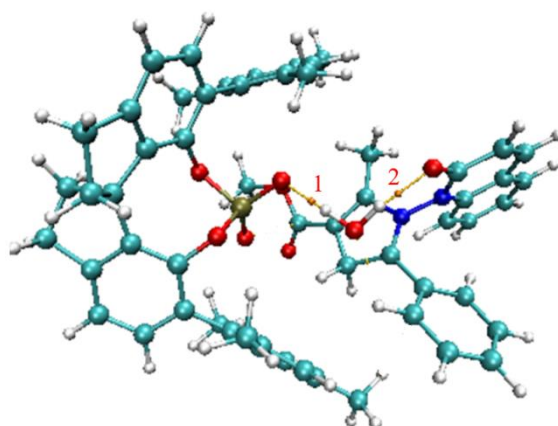

**TS2-Rr**

| Entry | Type of interaction | Distance | $\rho_{\text{bcp}} \times 10^{-2}$ | $G_{\text{b}} \times 10^{-2}$ | $V_{\text{b}} \times 10^{-2}$ | $H_{\text{b}} \times 10^{-3}$ | $\nabla_{2\rho} \times 10^{-1}$ |
|-------|---------------------|----------|------------------------------------|-------------------------------|-------------------------------|-------------------------------|---------------------------------|
| 1     | O-H $\cdots$ O      | 1.58     | 0.5910                             | 0.5103                        | -0.6734                       | -0.163                        | 0.1389                          |
| 2     | O-H $\cdots$ O      | 1.91     | 0.2552                             | 0.2481                        | -0.2264                       | 0.2171                        | 0.1079                          |

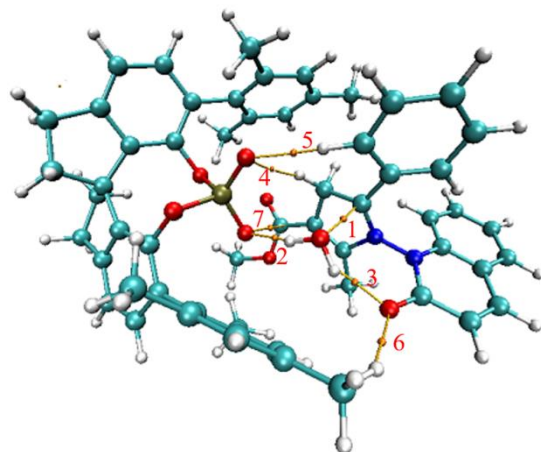

**TS2-Ss**

| Entry | Type of interaction | Distance | $\rho_{\text{bcp}} \times 10^{-2}$ | $G_{\text{b}} \times 10^{-2}$ | $V_{\text{b}} \times 10^{-2}$ | $H_{\text{b}} \times 10^{-3}$ | $\nabla_{2p} \times 10^{-1}$ |
|-------|---------------------|----------|------------------------------------|-------------------------------|-------------------------------|-------------------------------|------------------------------|
| 1     | TS                  | 2.13     | 0.5305                             | 0.3609                        | -0.4471                       | -0.8613                       | 0.1099                       |
| 2     | O-H $\cdots$ O      | 1.67     | 0.4902                             | 0.4234                        | -0.5255                       | -0.1021                       | 0.1285                       |
| 3     | O-H $\cdots$ O      | 1.93     | 0.2424                             | 0.234                         | -0.2096                       | 0.2437                        | 0.1033                       |
| 4     | C-H $\cdots$ O      | 2.28     | 0.2705                             | 0.4043                        | -0.3067                       | -0.2662                       | -0.9034                      |
| 5     | C-H $\cdots$ O      | 2.22     | 0.1376                             | 0.1111                        | -0.8459                       | 0.266                         | 0.5511                       |
| 6     | C-H $\cdots$ O      | 2.49     | 0.8302                             | 0.6319                        | -0.4755                       | 0.1564                        | 0.3153                       |
| 7     | C $\cdots$ O        | 2.71     | 0.1407                             | 0.1237                        | -0.1039                       | 0.1982                        | 0.5743                       |

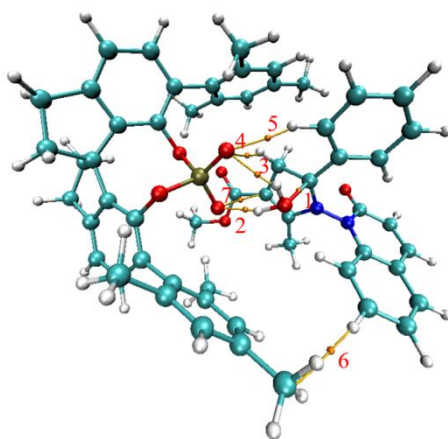

**TS2-Rs**

| Entry | Type of interaction | Distance | $\rho_{\text{bcp}} \times 10^{-2}$ | $G_{\text{b}} \times 10^{-2}$ | $V_{\text{b}} \times 10^{-2}$ | $H_{\text{b}} \times 10^{-3}$ | $\nabla_{2p} \times 10^{-1}$ |
|-------|---------------------|----------|------------------------------------|-------------------------------|-------------------------------|-------------------------------|------------------------------|
| 1     | TS                  | 1.91     | 0.8628                             | 0.5238                        | -0.8238                       | -0.3000                       | 0.8951                       |
| 2     | O-H $\cdots$ O      | 1.54     | 0.6956                             | 0.5501                        | -0.7967                       | -0.2466                       | 0.1213                       |
| 3     | O-H $\cdots$ O      | 1.97     | 0.2551                             | 0.233                         | -0.2159                       | 0.1719                        | 0.1001                       |
| 4     | C-H $\cdots$ O      | 2.55     | 0.9835                             | 0.6966                        | -0.5565                       | 0.1400                        | 0.3346                       |
| 5     | C-H $\cdots$ O      | 2.33     | 0.1186                             | 0.9199                        | -0.7142                       | 0.2057                        | 0.4502                       |
| 6     | C-H $\cdots$ C      | 2.84     | 0.5676                             | 0.3827                        | -0.2962                       | 0.8656                        | 0.1877                       |
| 7     | C $\cdots$ O        | 2.84     | 0.1362                             | 0.1165                        | -0.9945                       | 0.1706                        | 0.5343                       |

## (8) Reference

1. L. Zhang, J. Zhang, J. Ma, D.-J. Cheng and B. Tan, *J. Am. Chem. Soc.* 2017, **139**, 1714–1717.
2. Y.-R. Gao, L.-Y. Wang, T. Zhang, B.-M. Yang and Y. Zhao, *Angew. Chem., Int. Ed.*, 2022, **61**, e202200371.
3. M. Butini, S. Brindisi, S. Gemma, P. Minetti, W. Cabri, G. Gallo, S. Vincenti, E. Talamonti, F. Borsini, A. Caprioli, M. A. Stasi, S. D. Serio, S. Ros, G. Borrelli, S. Maramai, F. Fezza, G. Campiani, M. Maccarrone, *J. Med. Chem.*, 2012, **55**, 6898-6915.
4. K.-W. Chen, Z.-H. Chen, S. Yang, S.-F. Wu, Y.-C. Zhang and F. Shi, *Angew. Chem., Int. Ed.*, 2022, **61**, e202116829.
5. W. Hu, C. Zhang, J. Huang, Y. Guo, Z. Fu and W. Huang, *Org. Lett.* 2019, **21**, 941-945.
6. F. Stauffer and R. Neier, *Org. Lett.* 2000, **2**, 3535-3537.
7. M. J. Frisch, G. W. Trucks, H. B. Schlegel, G. E. Scuseria, M. A. Robb, J. R. Cheeseman, G. Scalmani, V. Barone, B. Mennucci, G. A. Petersson, H. Nakatsuji, M. Caricato, X. Li, H. P. Hratchian, A. F. Izmaylov, J. Bloino, G. Zheng, J. L. Sonnenberg, M. Hada, M. Ehara, K. Toyota, R. Fukuda, J. Hasegawa, M. Ishida, T. Nakajima, Y. Honda, O. Kitao, H. Nakai, T. Vreven, J. A. Montgomery Jr., J. E. Peralta, F. Ogliaro, M. Bearpark, J. J. Heyd, E. Brothers, K. N. Kudin, V. N. Staroverov, R. Kobayashi, J. Normand, K. Raghavachari, A. Rendell, J. C. Burant, S. S. Iyengar, J. Tomasi, M. Cossi, N. Rega, J. M. Millam, M. Klene, J. E. Knox, J. B. Cross, V. Bakken, C. Adamo, J. Jaramillo, R. Gomperts, R. E. Stratmann, O. Yazyev, A. J. Austin, R. Cammi, C. Pomelli, J. W. Ochterski, R. L. Martin, K. Morokuma, V. G. Zakrzewski, G. A. Voth, P. Salvador, J. J. Dannenberg, S. Dapprich, A. D. Daniels, Ö. Farkas, J. B. Foresman, J. V. Ortiz, J. Cioslowski and D. J. Fox, Gaussian 09, Revision A.01, Gaussian, Inc., Wallingford CT, 2009.
8. (a) D. Andrae, U. Häußermann, M. Dolg and H. Stoll, *Theor. Chim. Acta.*, 1990, **77**, 123–141; (b) F. Weigend and R. Ahlrichs, *Phys. Chem. Chem. Phys.*, 2005, **7**, 3297–3305.
9. (a) M. Cossi, V. Barone, R. Cammi and J. Tomasi, *Chem. Phys. Lett.*, 1996, **255**, 327–335; (b) E. Cancès, B. Mennucci and J. Tomasi, *J. Chem. Phys.*, 1997, **107**, 3032–3041; (c) V. Barone, M. Cossi and J. Tomasi, *J. Comput. Chem.*, 1998, **19**, 404–417; (d) A. V. Marenich, C. J. Cramer and D. G. Truhlar, *J. Phys. Chem. B.*, 2009, **113**, 6378–6396.
10. P. Winget, D. M. Dolney, D. J. Giesen, C. J. Cramer and D. G. Truhlar, Department of Chemistry and Supercomputer Institute, University of Minnesota, Minneapolis, MN 55455-0431.
11. CYLview, 1.0b, C. Y. Legault, Université de Sherbrooke, 2009 (<http://www.cylview.org>).
12. (a) E. R. Johnson, S. Keinan, P. Mori-Sánchez, J. ContrerasGarcía, A. J. Cohen and W. Yang, *J. Am. Chem. Soc.*, 2010, **132**, 6498–6506; (b) T. Lu and F. Chen, *J. Comput. Chem.*, 2012, **33**, 580–592.
13. T. Lu and Q. Chen, *J. Comput. Chem.*, 2022, **43**, 539–555.
14. R. F. W. Bader, *Chem. Rev.*, 1991, **91**, 893–928.

## (9) HPLC Resolution Data

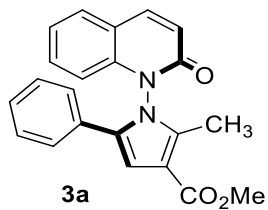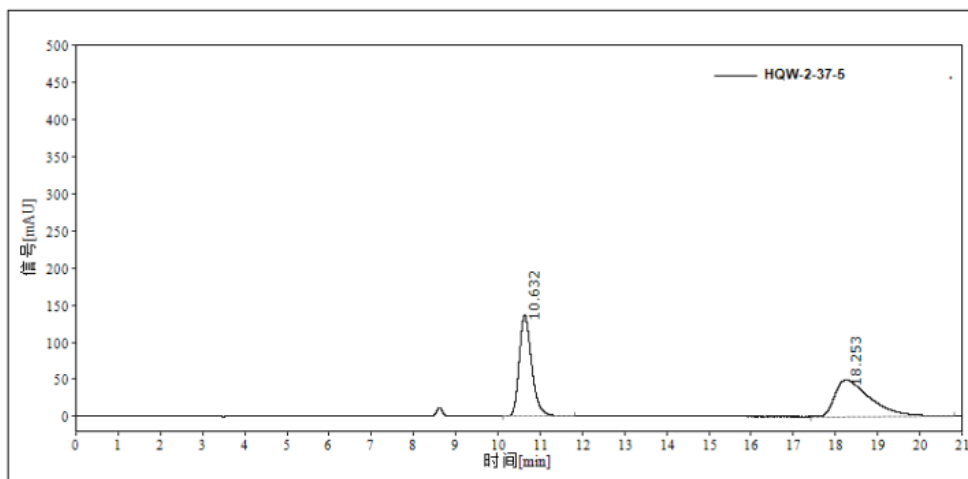

### Integration Results

| #      | Retention time [min] | Height [mAU] | Relative Height [%] | Area [mAU*min] | Relative Area [%] | Amount n.a. |
|--------|----------------------|--------------|---------------------|----------------|-------------------|-------------|
| 1      | 10.632               | 136.349      | 73.5                | 2832.712       | 49.8              | n.a.        |
| 2      | 18.253               | 49.096       | 26.5                | 2858.217       | 50.2              | n.a.        |
| Total: |                      | 185.445      | 100.0               | 5690.929       | 100               |             |

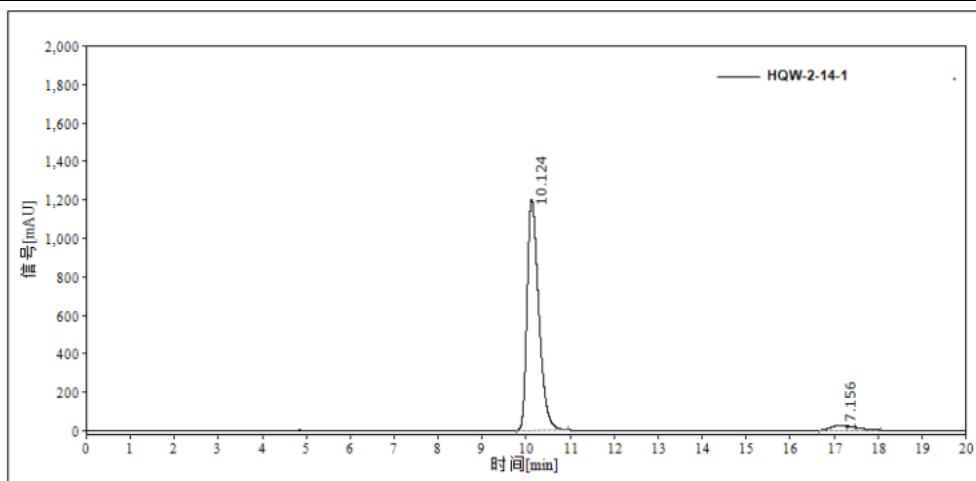

### Integration Results

| #      | Retention time [min] | Height [mAU] | Relative Height [%] | Area [mAU*min] | Relative Area [%] | Amount n.a. |
|--------|----------------------|--------------|---------------------|----------------|-------------------|-------------|
| 1      | 10.124               | 1201.289     | 97.9                | 22294.086      | 95.5              | n.a.        |
| 2      | 17.156               | 25.734       | 2.1                 | 1047.744       | 4.5               | n.a.        |
| Total: |                      | 1227.023     | 100                 | 23341.830      | 100.0             |             |

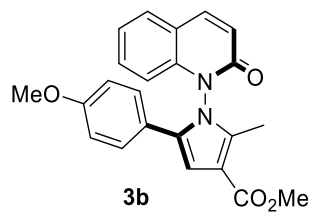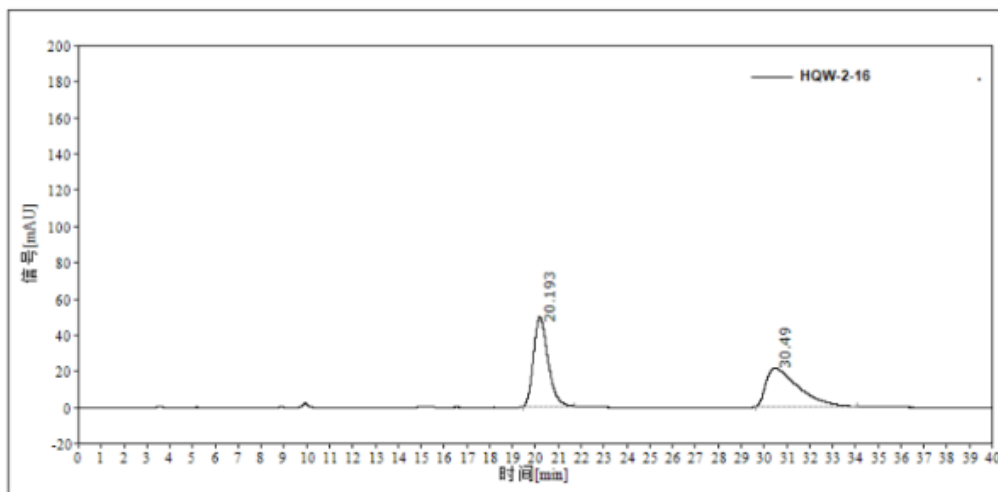

| Integration Results |                      |              |                     |                |                   |             |
|---------------------|----------------------|--------------|---------------------|----------------|-------------------|-------------|
| #                   | Retention time [min] | Height [mAU] | Relative Height [%] | Area [mAU*min] | Relative Area [%] | Amount n.a. |
| 1                   | 20.193               | 49.293       | 69.9                | 2176.047       | 50.8              | n.a.        |
| 2                   | 30.490               | 21.264       | 30.1                | 2108.492       | 49.2              | n.a.        |
| Total:              |                      | 70.557       | 100                 | 4284.539       | 100.0             |             |

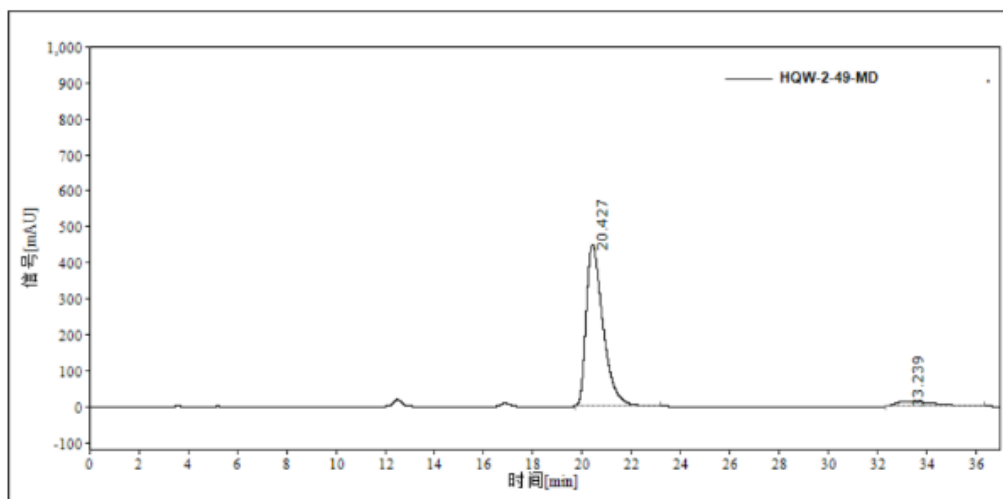

| Integration Results |                      |              |                     |                |                   |             |
|---------------------|----------------------|--------------|---------------------|----------------|-------------------|-------------|
| #                   | Retention time [min] | Height [mAU] | Relative Height [%] | Area [mAU*min] | Relative Area [%] | Amount n.a. |
| 1                   | 20.427               | 449.015      | 96.9                | 21448.844      | 93.4              | n.a.        |
| 2                   | 33.239               | 14.237       | 3.1                 | 1524.747       | 6.6               | n.a.        |
| Total:              |                      | 463.252      | 100                 | 22973.591      | 100.0             |             |



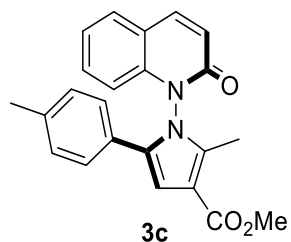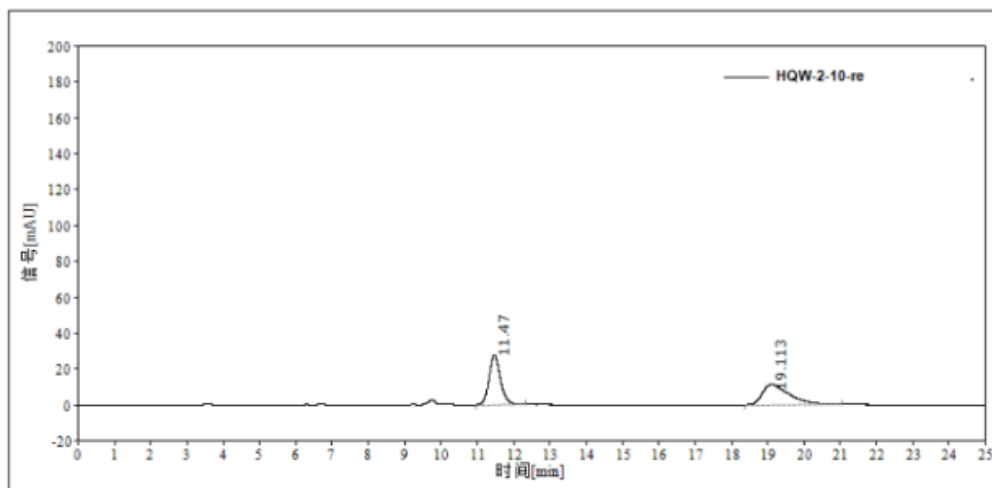

| Integration Results |                      |              |                     |                |                   |             |
|---------------------|----------------------|--------------|---------------------|----------------|-------------------|-------------|
| #                   | Retention time [min] | Height [mAU] | Relative Height [%] | Area [mAU*min] | Relative Area [%] | Amount n.a. |
| 1                   | 11.470               | 27.465       | 71.2                | 602.540        | 50.9              | n.a.        |
| 2                   | 19.113               | 11.113       | 28.8                | 581.549        | 49.1              | n.a.        |
| Total:              |                      | 38.578       | 100                 | 1184.089       | 100.0             |             |

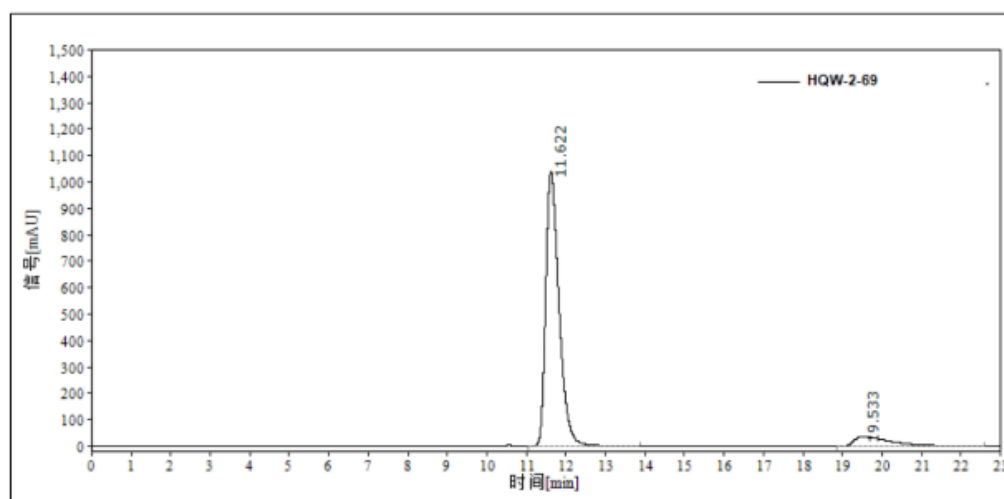

| Integration Results |                      |              |                     |                |                   |             |
|---------------------|----------------------|--------------|---------------------|----------------|-------------------|-------------|
| #                   | Retention time [min] | Height [mAU] | Relative Height [%] | Area [mAU*min] | Relative Area [%] | Amount n.a. |
| 1                   | 11.622               | 1039.543     | 96.6                | 24325.666      | 91.2              | n.a.        |
| 2                   | 19.533               | 36.445       | 3.4                 | 2350.846       | 8.8               | n.a.        |

|        |  |          |     |           |       |  |
|--------|--|----------|-----|-----------|-------|--|
| Total: |  | 1075.988 | 100 | 26676.512 | 100.0 |  |
|--------|--|----------|-----|-----------|-------|--|

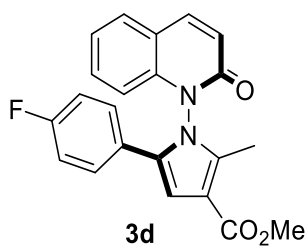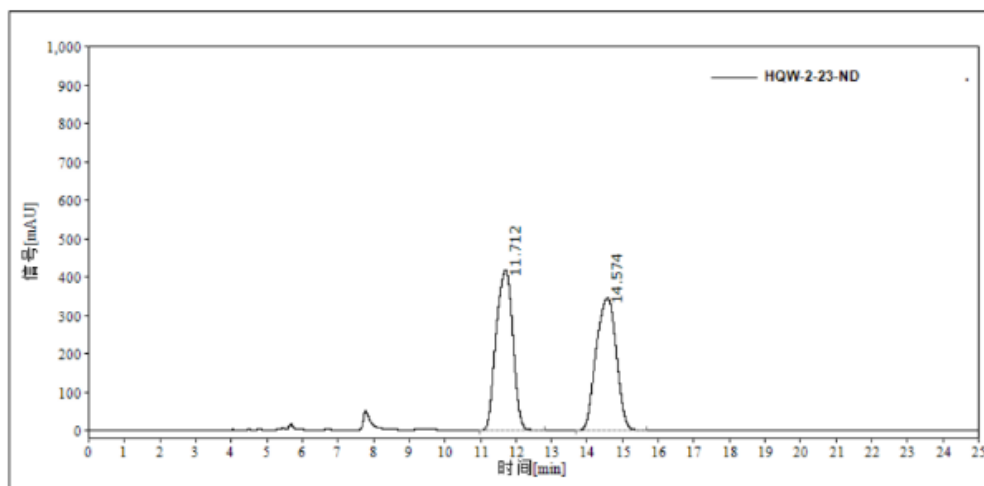

| Integration Results |                      |              |                     |                |                   |             |
|---------------------|----------------------|--------------|---------------------|----------------|-------------------|-------------|
| #                   | Retention time [min] | Height [mAU] | Relative Height [%] | Area [mAU*min] | Relative Area [%] | Amount n.a. |
| 1                   | 11.712               | 417.188      | 54.8                | 13600.258      | 50.0              | n.a.        |
| 2                   | 14.574               | 344.761      | 45.2                | 13588.861      | 50.0              | n.a.        |
| Total:              |                      | 761.949      | 100                 | 27189.119      | 100.0             |             |

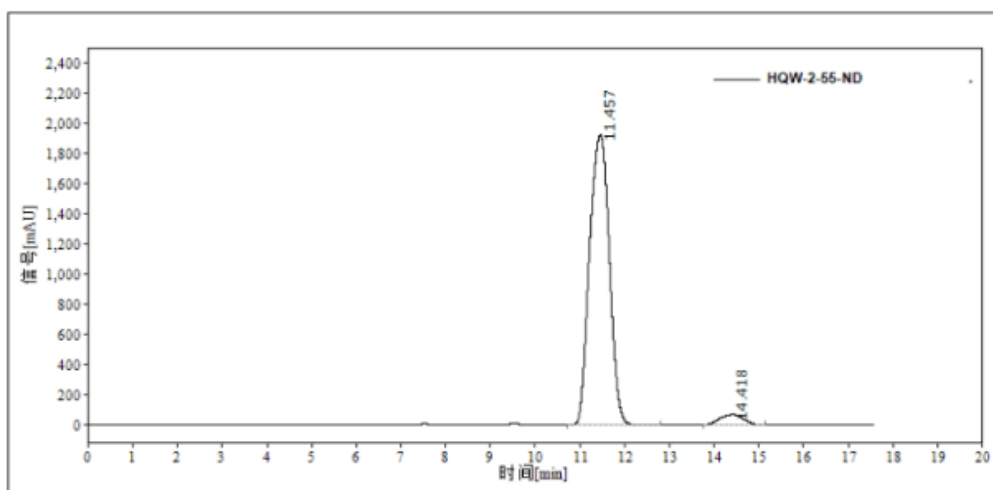

| Integration Results |                      |              |                     |                |                   |             |
|---------------------|----------------------|--------------|---------------------|----------------|-------------------|-------------|
| #                   | Retention time [min] | Height [mAU] | Relative Height [%] | Area [mAU*min] | Relative Area [%] | Amount n.a. |
| 1                   | 11.457               | 1925.644     | 96.6                | 59339.035      | 96.0              | n.a.        |

|        |        |          |     |           |       |      |
|--------|--------|----------|-----|-----------|-------|------|
| 2      | 14.418 | 66.938   | 3.4 | 2463.368  | 4.0   | n.a. |
| Total: |        | 1992.582 | 100 | 61802.403 | 100.0 |      |

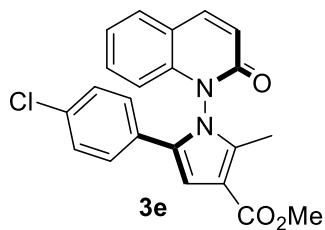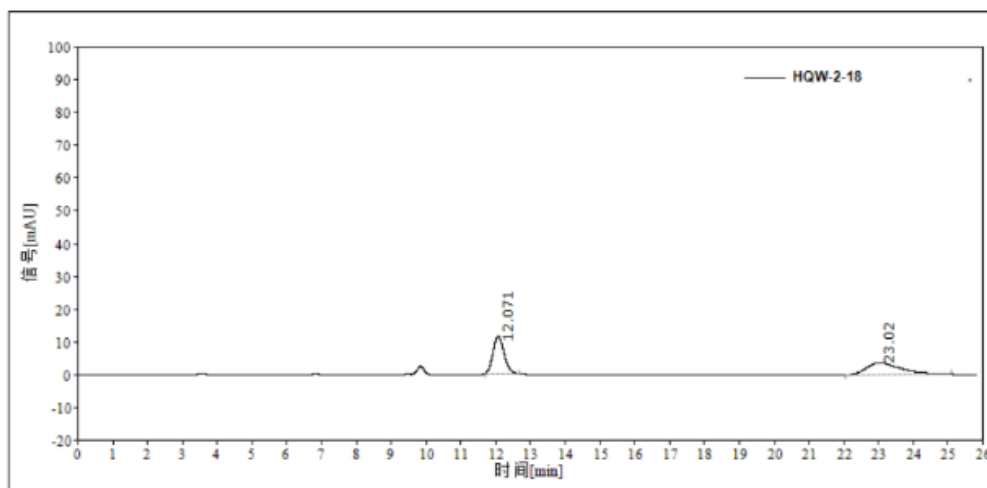

| Integration Results |                      |              |                     |                |                   |             |
|---------------------|----------------------|--------------|---------------------|----------------|-------------------|-------------|
| #                   | Retention time [min] | Height [mAU] | Relative Height [%] | Area [mAU*min] | Relative Area [%] | Amount n.a. |
| 1                   | 12.071               | 11.428       | 76.5                | 252.887        | 50.8              | n.a.        |
| 2                   | 23.020               | 3.517        | 23.5                | 245.125        | 49.2              | n.a.        |
| Total:              |                      | 14.945       | 100                 | 498.012        | 100.0             |             |

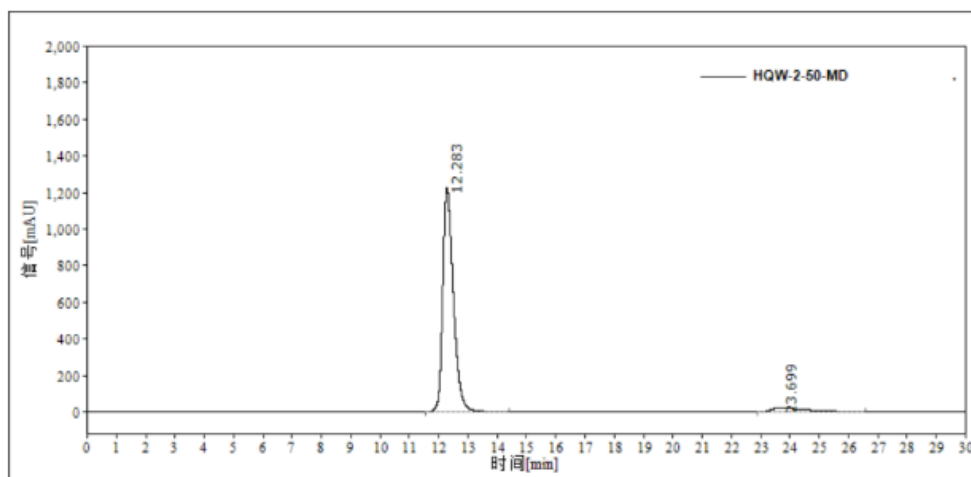

| Integration Results |                      |              |                     |                |                   |             |
|---------------------|----------------------|--------------|---------------------|----------------|-------------------|-------------|
| #                   | Retention time [min] | Height [mAU] | Relative Height [%] | Area [mAU*min] | Relative Area [%] | Amount n.a. |
| 1                   | 12.283               | 1226.400     | 98.3                | 31009.774      | 94.4              | n.a.        |

|        |        |          |     |           |       |      |
|--------|--------|----------|-----|-----------|-------|------|
| 2      | 23.699 | 21.655   | 1.7 | 1822.181  | 5.6   | n.a. |
| Total: |        | 1248.055 | 100 | 32831.955 | 100.0 |      |

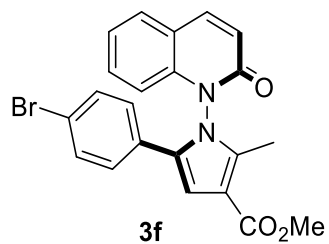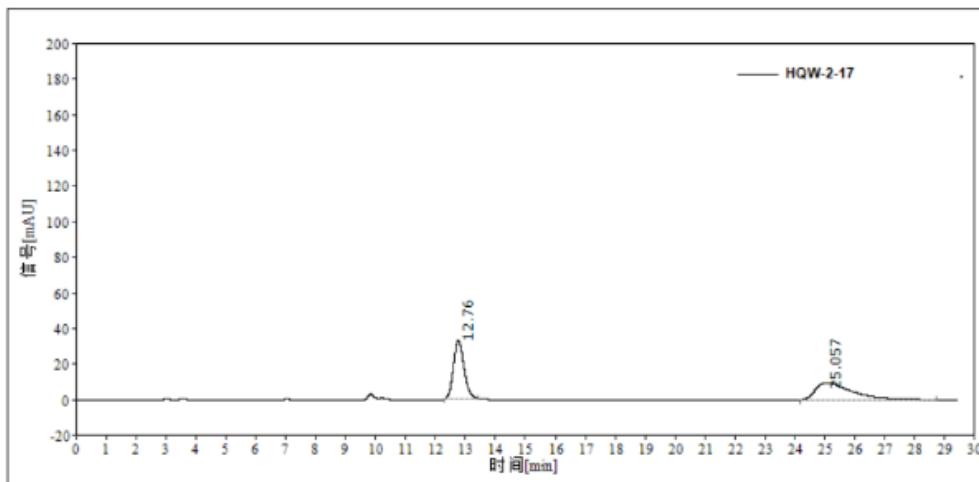

| Integration Results |                      |              |                     |                |                   |             |
|---------------------|----------------------|--------------|---------------------|----------------|-------------------|-------------|
| #                   | Retention time [min] | Height [mAU] | Relative Height [%] | Area [mAU*min] | Relative Area [%] | Amount n.a. |
| 1                   | 12.760               | 33.052       | 77.8                | 808.702        | 50.2              | n.a.        |
| 2                   | 25.057               | 9.410        | 22.2                | 801.436        | 49.8              | n.a.        |
| Total:              |                      | 42.462       | 100                 | 1610.138       | 100.0             |             |

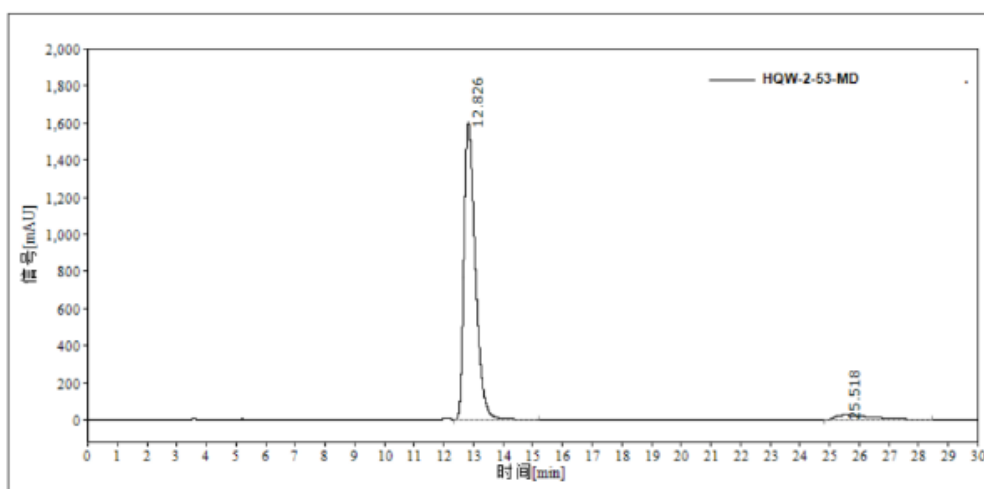

| Integration Results |                      |              |                     |                |                   |             |
|---------------------|----------------------|--------------|---------------------|----------------|-------------------|-------------|
| #                   | Retention time [min] | Height [mAU] | Relative Height [%] | Area [mAU*min] | Relative Area [%] | Amount n.a. |
| 1                   | 12.826               | 1600         | 100                 | 1600           | 100               | n.a.        |
| 2                   | 25.518               | 50           | 3.1                 | 150            | 9.3               | n.a.        |
| Total:              |                      | 1650         | 100                 | 1750           | 100               |             |

|        |        |          |      |           |       |      |
|--------|--------|----------|------|-----------|-------|------|
| 1      | 12.826 | 1605.033 | 98.4 | 42814.780 | 94.5  | n.a. |
| 2      | 25.518 | 26.723   | 1.6  | 2505.599  | 5.5   | n.a. |
| Total: |        | 1631.756 | 100  | 45320.379 | 100.0 |      |

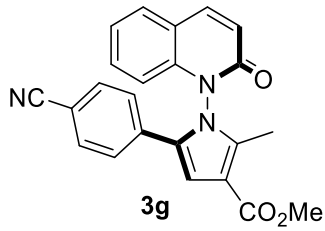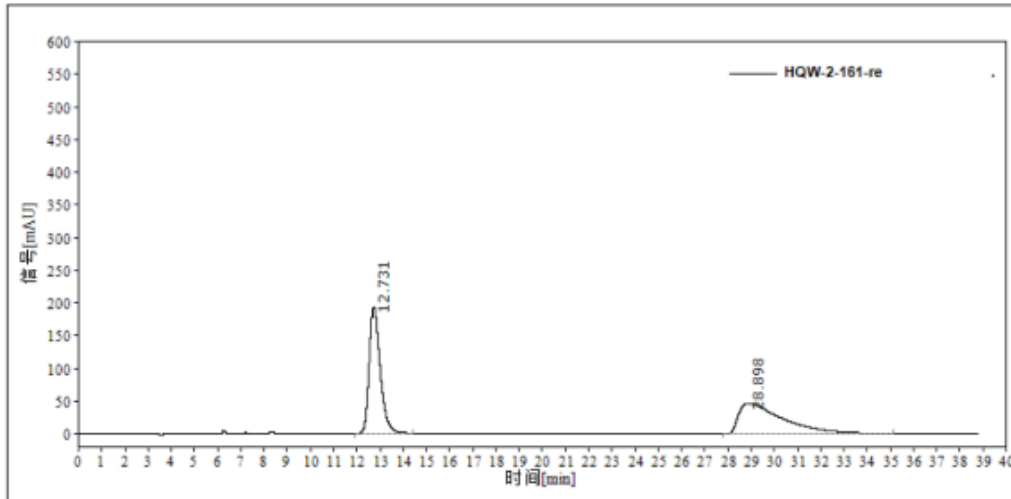

| Integration Results |                      |              |                     |                |                   |             |
|---------------------|----------------------|--------------|---------------------|----------------|-------------------|-------------|
| #                   | Retention time [min] | Height [mAU] | Relative Height [%] | Area [mAU*min] | Relative Area [%] | Amount n.a. |
| 1                   | 12.731               | 192.996      | 80.4                | 6392.628       | 50.4              | n.a.        |
| 2                   | 28.898               | 47.002       | 19.6                | 6288.735       | 49.6              | n.a.        |
| Total:              |                      | 239.998      | 100                 | 12681.363      | 100.0             |             |

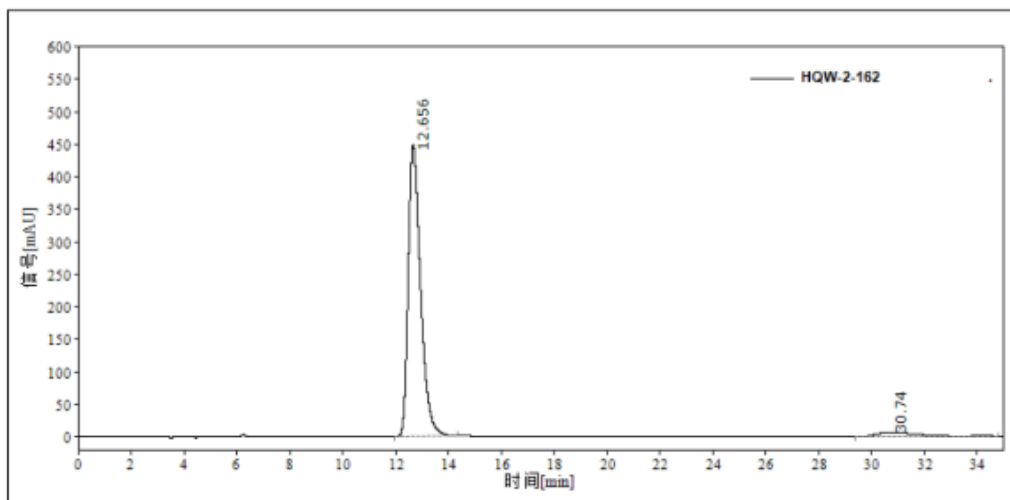

| Integration Results |                      |              |                     |                |                   |             |
|---------------------|----------------------|--------------|---------------------|----------------|-------------------|-------------|
| #                   | Retention time [min] | Height [mAU] | Relative Height [%] | Area [mAU*min] | Relative Area [%] | Amount n.a. |
| 1                   | 12.656               | 450          | ~80                 | ~5000          | ~50               | n.a.        |
| 2                   | 30.74                | ~20          | ~4                  | ~600           | ~6                | n.a.        |

|        |        |         |      |           |       |      |
|--------|--------|---------|------|-----------|-------|------|
| 1      | 12.656 | 448.606 | 98.5 | 14612.750 | 94.8  | n.a. |
| 2      | 30.740 | 6.745   | 1.5  | 800.932   | 5.2   | n.a. |
| Total: |        | 455.351 | 100  | 15413.682 | 100.0 |      |

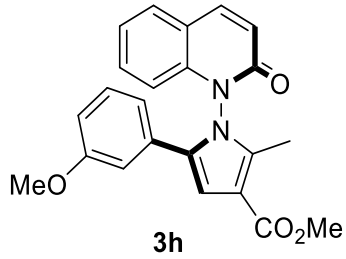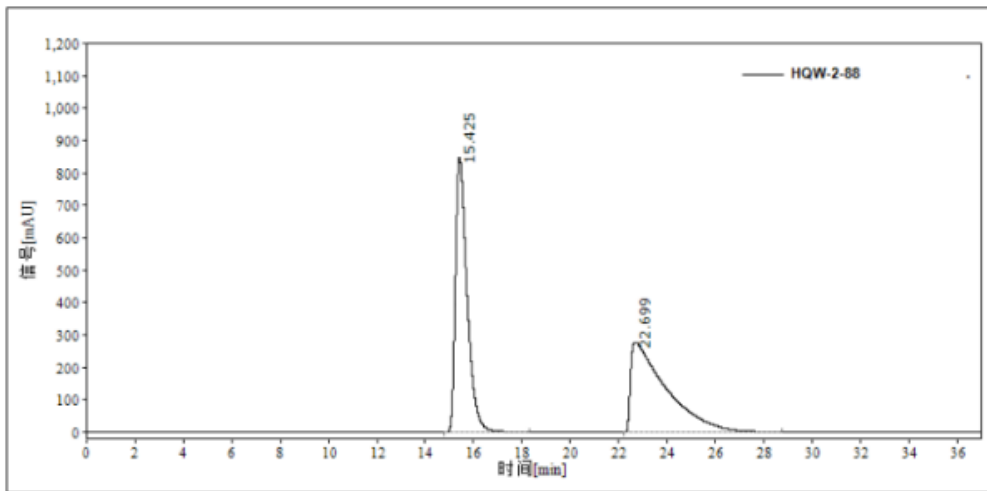

| Integration Results |                      |              |                     |                |                   |             |
|---------------------|----------------------|--------------|---------------------|----------------|-------------------|-------------|
| #                   | Retention time [min] | Height [mAU] | Relative Height [%] | Area [mAU*min] | Relative Area [%] | Amount n.a. |
| 1                   | 15.425               | 848.749      | 75.3                | 28484.700      | 50.0              | n.a.        |
| 2                   | 22.699               | 277.665      | 24.7                | 28473.799      | 50.0              | n.a.        |
| Total:              |                      | 1126.414     | 100                 | 56958.499      | 100.0             |             |

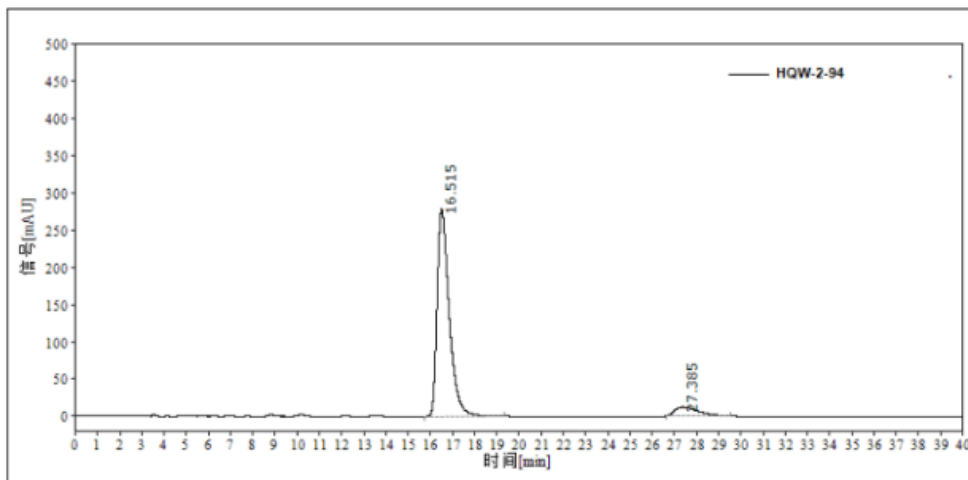

| Integration Results |                      |              |                     |                |                   |             |
|---------------------|----------------------|--------------|---------------------|----------------|-------------------|-------------|
| #                   | Retention time [min] | Height [mAU] | Relative Height [%] | Area [mAU*min] | Relative Area [%] | Amount n.a. |
| 1                   | 16.515               | 277.665      | 24.7                | 28473.799      | 50.0              | n.a.        |
| 2                   | 27.385               | 848.749      | 75.3                | 28484.700      | 50.0              | n.a.        |

|        |        |         |      |           |       |      |
|--------|--------|---------|------|-----------|-------|------|
| 1      | 16.515 | 278.463 | 95.9 | 10601.021 | 92.1  | n.a. |
| 2      | 27.385 | 11.761  | 4.1  | 907.119   | 7.9   | n.a. |
| Total: |        | 290.224 | 100  | 11508.140 | 100.0 |      |

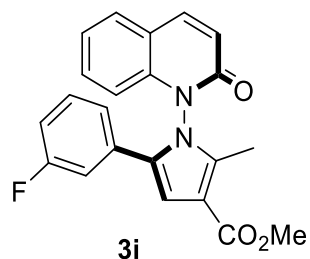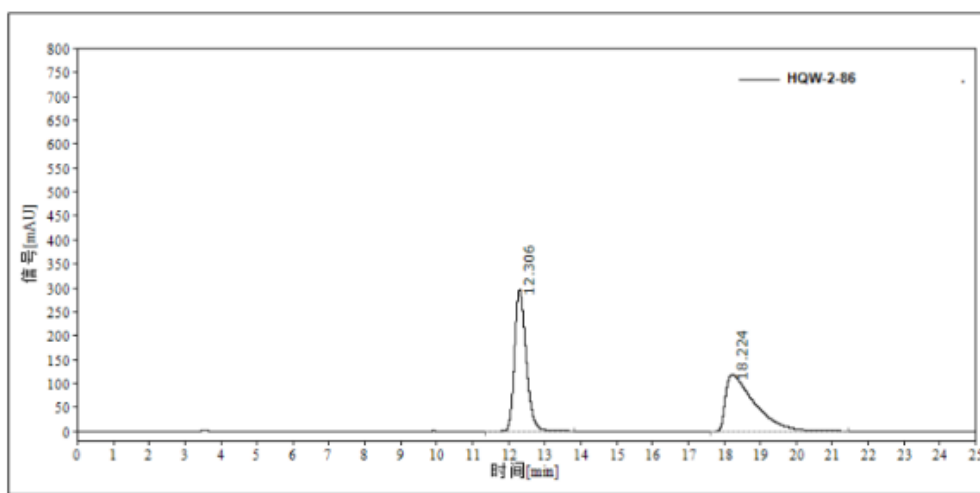

| Integration Results |                      |              |                     |                |                   |             |
|---------------------|----------------------|--------------|---------------------|----------------|-------------------|-------------|
| #                   | Retention time [min] | Height [mAU] | Relative Height [%] | Area [mAU*min] | Relative Area [%] | Amount n.a. |
| 1                   | 12.306               | 297.192      | 71.5                | 6682.103       | 50.1              | n.a.        |
| 2                   | 18.224               | 118.384      | 28.5                | 6653.987       | 49.9              | n.a.        |
| Total:              |                      | 415.576      | 100                 | 13336.090      | 100.0             |             |

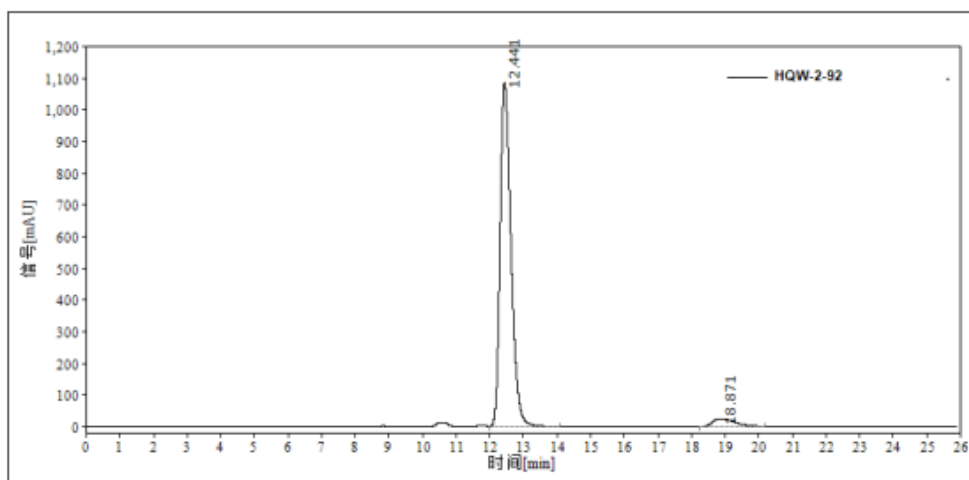

| Integration Results |                      |              |                     |                |                   |             |
|---------------------|----------------------|--------------|---------------------|----------------|-------------------|-------------|
| #                   | Retention time [min] | Height [mAU] | Relative Height [%] | Area [mAU*min] | Relative Area [%] | Amount n.a. |
| 1                   | 12.441               | 1100         | ~90                 | ~13000         | ~90               | n.a.        |
| 2                   | 18.871               | ~100         | ~10                 | ~1000          | ~10               | n.a.        |

|        |        |           |      |           |       |      |
|--------|--------|-----------|------|-----------|-------|------|
| 1      | 12.441 | 1085.337  | 97.7 | 24314.870 | 95.4  | n.a. |
| 2      | 18.871 | 25.772    | 2.3  | 1180.107  | 4.6   | n.a. |
| Total: |        | 11111.109 | 100  | 25494.977 | 100.0 |      |

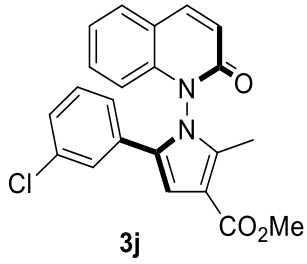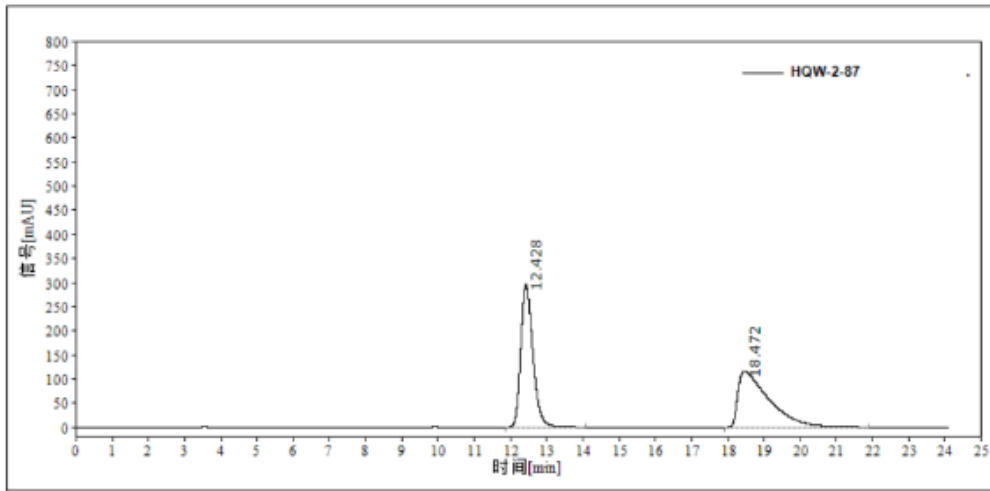

| Integration Results |                      |              |                     |                |                   |             |
|---------------------|----------------------|--------------|---------------------|----------------|-------------------|-------------|
| #                   | Retention time [min] | Height [mAU] | Relative Height [%] | Area [mAU*min] | Relative Area [%] | Amount n.a. |
| 1                   | 12.428               | 295.997      | 71.8                | 6905.642       | 50.0              | n.a.        |
| 2                   | 18.472               | 116.043      | 28.2                | 6894.641       | 50.0              | n.a.        |
| Total:              |                      | 412.040      | 100                 | 13800.283      | 100.0             |             |

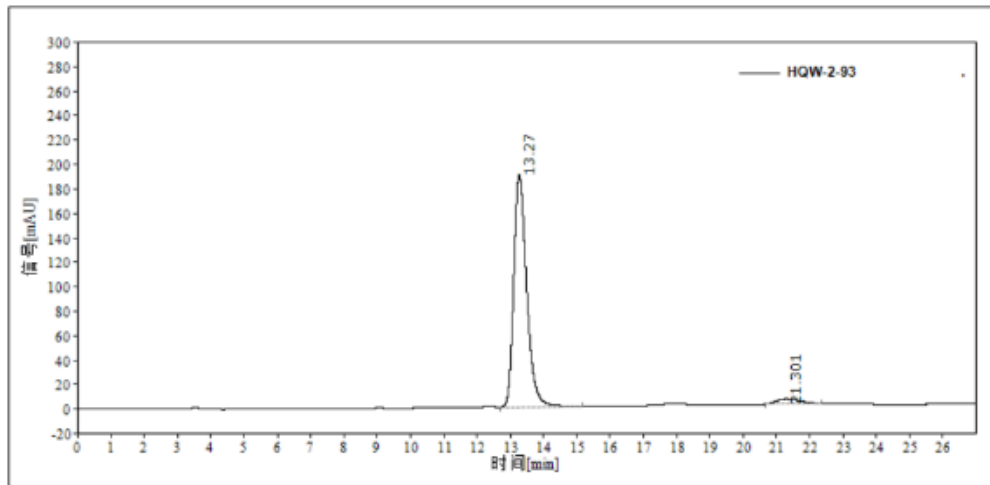

| Integration Results |                      |              |                     |                |                   |             |
|---------------------|----------------------|--------------|---------------------|----------------|-------------------|-------------|
| #                   | Retention time [min] | Height [mAU] | Relative Height [%] | Area [mAU*min] | Relative Area [%] | Amount n.a. |
| 1                   | 13.27                | 200          | ~70                 | ~2600          | ~50               | n.a.        |
| 2                   | 21.301               | ~10          | ~3                  | ~200           | ~5                | n.a.        |



|        |        |         |      |          |       |      |
|--------|--------|---------|------|----------|-------|------|
| 1      | 13.270 | 189.259 | 97.9 | 5117.954 | 96.1  | n.a. |
| 2      | 21.301 | 4.010   | 2.1  | 207.436  | 3.9   | n.a. |
| Total: |        | 193.269 | 100  | 5325.390 | 100.0 |      |

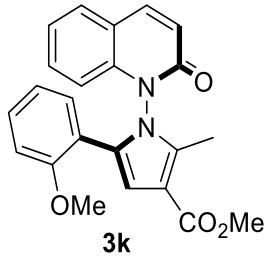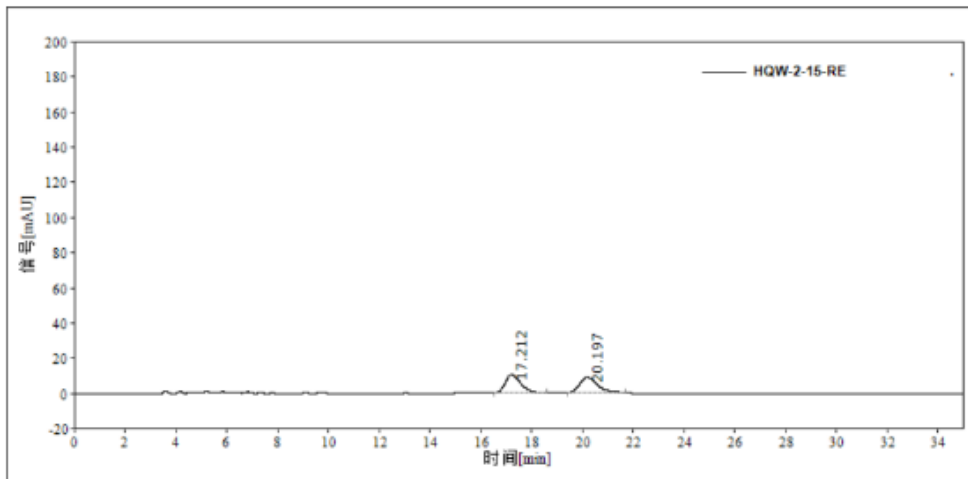

| Integration Results |                      |              |                     |                |                   |             |
|---------------------|----------------------|--------------|---------------------|----------------|-------------------|-------------|
| #                   | Retention time [min] | Height [mAU] | Relative Height [%] | Area [mAU*min] | Relative Area [%] | Amount n.a. |
| 1                   | 17.212               | 10.351       | 53.8                | 441.033        | 49.9              | n.a.        |
| 2                   | 20.197               | 8.904        | 46.2                | 442.452        | 50.1              | n.a.        |
| Total:              |                      | 19.255       | 100                 | 883.485        | 100.0             |             |

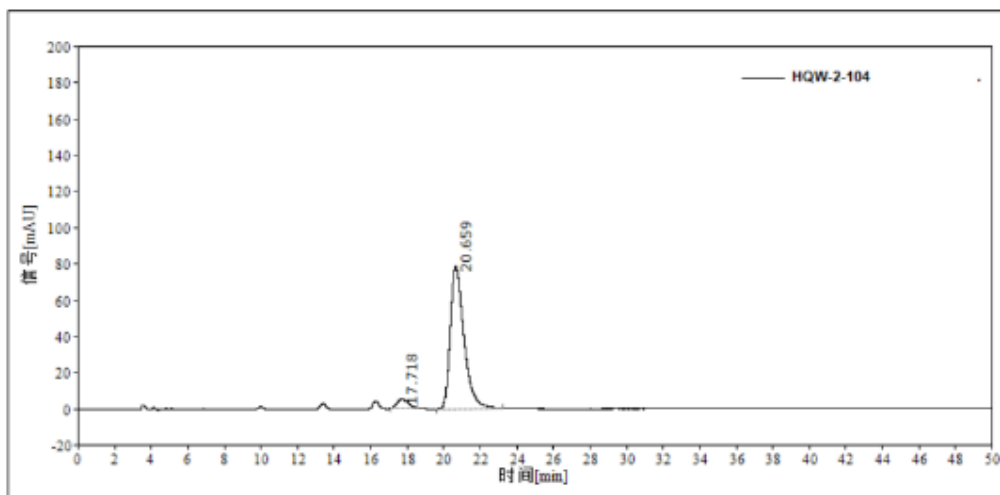

| Integration Results |                      |              |                     |                |                   |             |
|---------------------|----------------------|--------------|---------------------|----------------|-------------------|-------------|
| #                   | Retention time [min] | Height [mAU] | Relative Height [%] | Area [mAU*min] | Relative Area [%] | Amount n.a. |
| 1                   | 17.718               |              |                     |                |                   |             |
| 2                   | 20.659               |              |                     |                |                   |             |

|        |        |        |      |          |       |      |
|--------|--------|--------|------|----------|-------|------|
| 1      | 17.718 | 5111   | 6.1  | 214.327  | 5.0   | n.a. |
| 2      | 20.659 | 78.328 | 93.9 | 4078.902 | 95.0  | n.a. |
| Total: |        | 83.439 | 100  | 4293.229 | 100.0 |      |

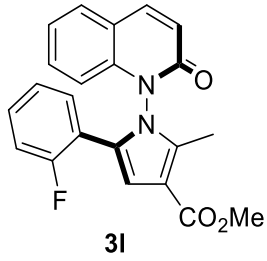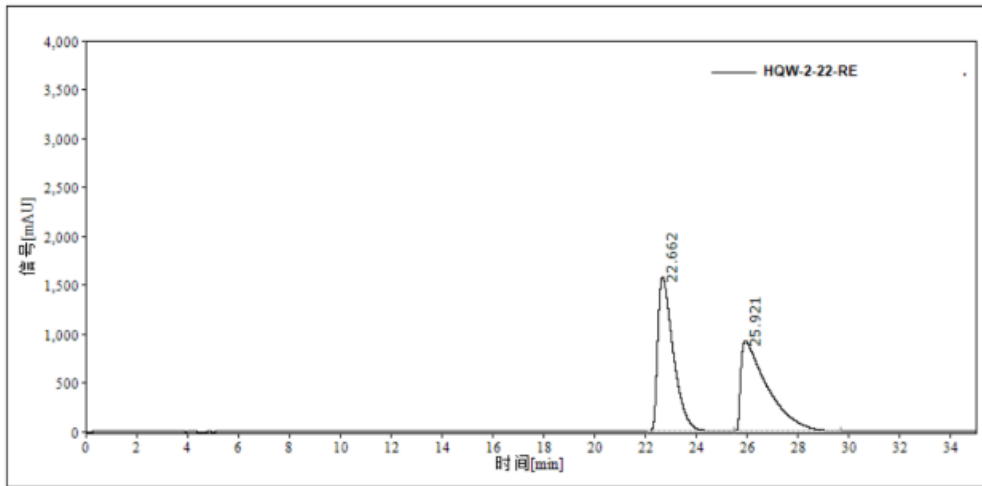

| Integration Results |                      |              |                     |                |                   |             |
|---------------------|----------------------|--------------|---------------------|----------------|-------------------|-------------|
| #                   | Retention time [min] | Height [mAU] | Relative Height [%] | Area [mAU*min] | Relative Area [%] | Amount n.a. |
| 1                   | 22.662               | 1586.410     | 63.2                | 67343.809      | 50.0              | n.a.        |
| 2                   | 25.921               | 925.281      | 36.8                | 67261.393      | 50.0              | n.a.        |
| Total:              |                      | 2511.691     | 100                 | 134605.202     | 100.0             |             |

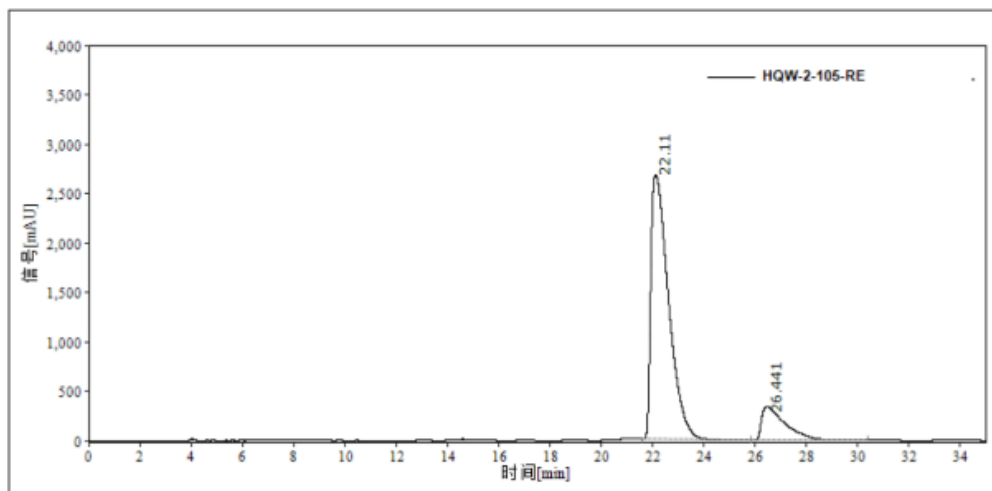

| Integration Results |                      |              |                     |                |                   |             |
|---------------------|----------------------|--------------|---------------------|----------------|-------------------|-------------|
| #                   | Retention time [min] | Height [mAU] | Relative Height [%] | Area [mAU*min] | Relative Area [%] | Amount n.a. |
| 1                   | 22.11                | 2700         | 63.2                | 67343.809      | 50.0              | n.a.        |
| 2                   | 26.441               | 400          | 36.8                | 67261.393      | 50.0              | n.a.        |
| Total:              |                      | 3100         | 100                 | 134605.202     | 100.0             |             |

|        |        |          |      |            |       |      |
|--------|--------|----------|------|------------|-------|------|
| 1      | 22.110 | 2679.687 | 88.7 | 129058.720 | 85.4  | n.a. |
| 2      | 26.441 | 341.326  | 11.3 | 22101.807  | 14.6  | n.a. |
| Total: |        | 3021.013 | 100  | 151160.527 | 100.0 |      |

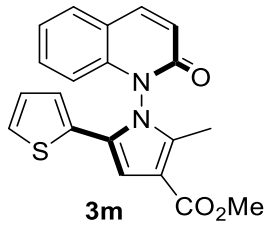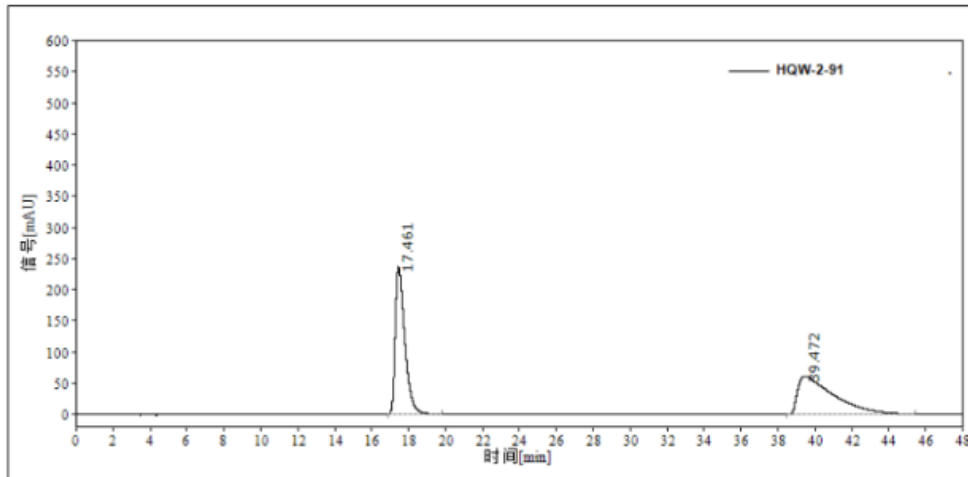

| Integration Results |                      |              |                     |                |                   |             |
|---------------------|----------------------|--------------|---------------------|----------------|-------------------|-------------|
| #                   | Retention time [min] | Height [mAU] | Relative Height [%] | Area [mAU*min] | Relative Area [%] | Amount n.a. |
| 1                   | 17.461               | 236.295      | 79.5                | 8546.690       | 50.5              | n.a.        |
| 2                   | 39.472               | 60.975       | 20.5                | 8365.900       | 49.5              | n.a.        |
| Total:              |                      | 297.270      | 100                 | 16912.590      | 100.0             |             |

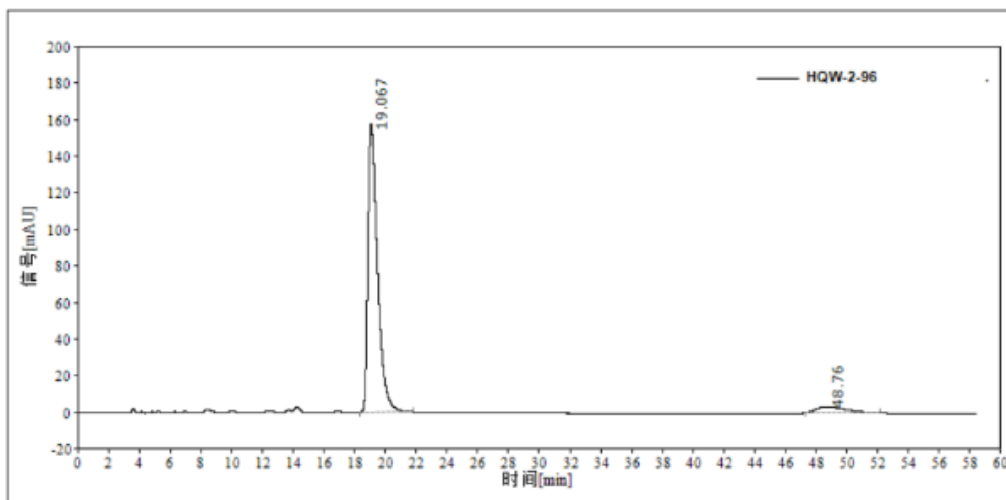

| Integration Results |                      |              |                     |                |                   |             |
|---------------------|----------------------|--------------|---------------------|----------------|-------------------|-------------|
| #                   | Retention time [min] | Height [mAU] | Relative Height [%] | Area [mAU*min] | Relative Area [%] | Amount n.a. |
| 1                   | 19.067               | 160.000      | 100.0               | 1600.000       | 100.0             | n.a.        |
| 2                   | 48.76                | 10.000       | 6.3                 | 63.000         | 3.9               | n.a.        |
| Total:              |                      | 170.000      | 106.3               | 1763.000       | 103.9             |             |

|        |        |         |      |          |       |      |
|--------|--------|---------|------|----------|-------|------|
| 1      | 19.067 | 157.896 | 98.0 | 6880.430 | 93.8  | n.a. |
| 2      | 48.760 | 3.283   | 2.0  | 451.268  | 6.2   | n.a. |
| Total: |        | 161.179 | 100  | 7331.698 | 100.0 |      |

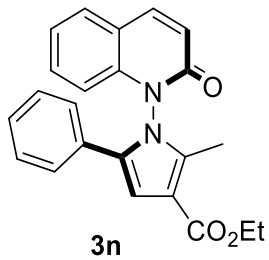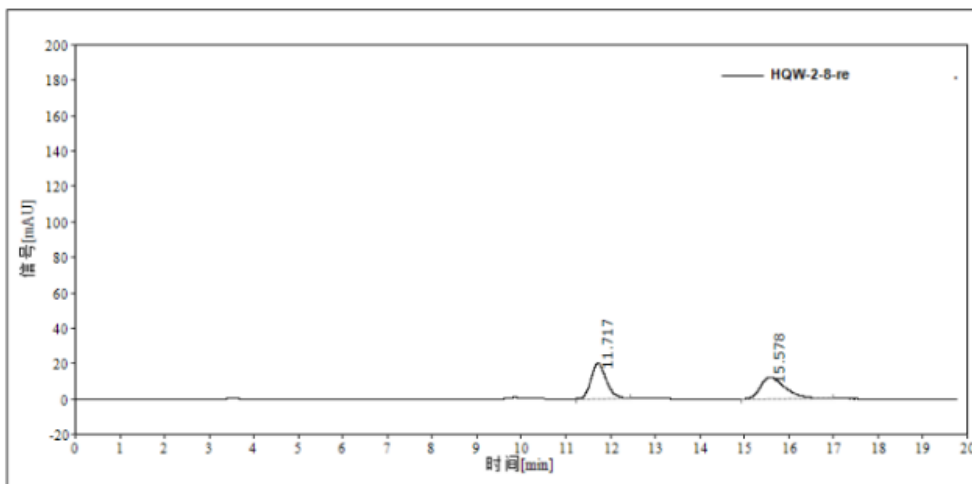

| Integration Results |                      |              |                     |                |                   |             |
|---------------------|----------------------|--------------|---------------------|----------------|-------------------|-------------|
| #                   | Retention time [min] | Height [mAU] | Relative Height [%] | Area [mAU*min] | Relative Area [%] | Amount n.a. |
| 1                   | 11.717               | 19.843       | 62.0                | 474.563        | 50.0              | n.a.        |
| 2                   | 15.578               | 12.165       | 38.0                | 473.768        | 50.0              | n.a.        |
| Total:              |                      | 32.008       | 100                 | 948.331        | 100.0             |             |

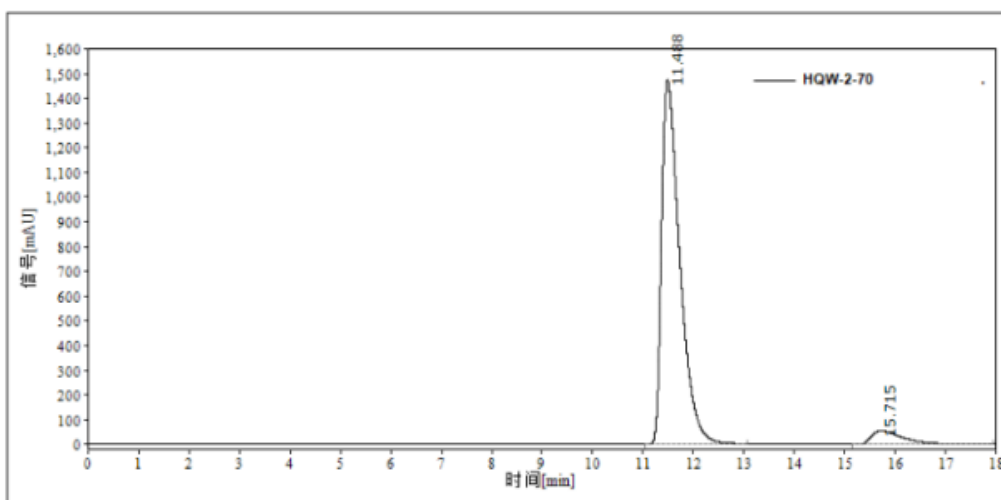

| Integration Results |                      |              |                     |                |                   |             |
|---------------------|----------------------|--------------|---------------------|----------------|-------------------|-------------|
| #                   | Retention time [min] | Height [mAU] | Relative Height [%] | Area [mAU*min] | Relative Area [%] | Amount n.a. |
| 1                   | 11.488               | 1500         | 98.0                | 6880.430       | 93.8              | n.a.        |
| 2                   | 15.715               | 10           | 2.0                 | 451.268        | 6.2               | n.a.        |
| Total:              |                      | 161.179      | 100                 | 7331.698       | 100.0             |             |

|        |        |          |      |           |       |      |
|--------|--------|----------|------|-----------|-------|------|
| 1      | 11.488 | 1473.234 | 96.4 | 36993.079 | 93.9  | n.a. |
| 2      | 15.715 | 54.867   | 3.6  | 2414.437  | 6.1   | n.a. |
| Total: |        | 1528.101 | 100  | 39407.516 | 100.0 |      |

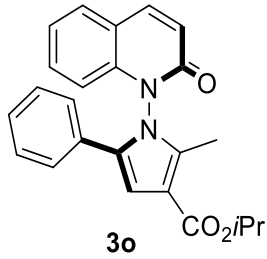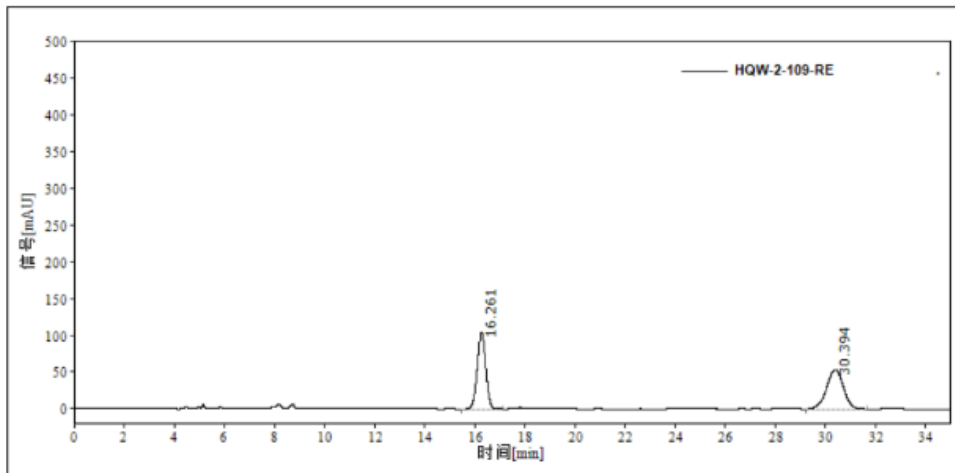

| Integration Results |                      |              |                     |                |                   |             |
|---------------------|----------------------|--------------|---------------------|----------------|-------------------|-------------|
| #                   | Retention time [min] | Height [mAU] | Relative Height [%] | Area [mAU*min] | Relative Area [%] | Amount n.a. |
| 1                   | 16.261               | 104.512      | 66.0                | 2483.586       | 49.7              | n.a.        |
| 2                   | 30.394               | 53.725       | 34.0                | 2513.712       | 50.3              | n.a.        |
| Total:              |                      | 158.237      | 100                 | 4997.298       | 100.0             |             |

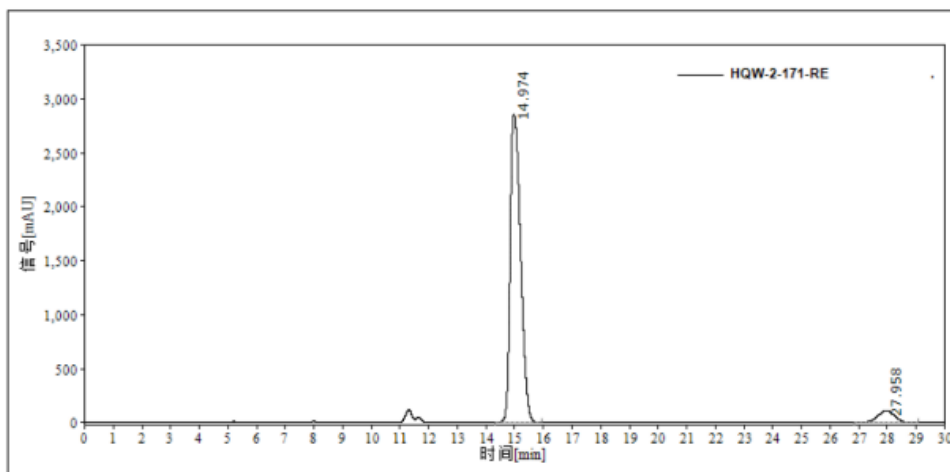

| Integration Results |                      |              |                     |                |                   |             |
|---------------------|----------------------|--------------|---------------------|----------------|-------------------|-------------|
| #                   | Retention time [min] | Height [mAU] | Relative Height [%] | Area [mAU*min] | Relative Area [%] | Amount n.a. |
| 1                   | 14.974               | 2856.815     | 96.3                | 72103.038      | 94.1              | n.a.        |

|        |        |          |     |           |       |      |
|--------|--------|----------|-----|-----------|-------|------|
| 2      | 27.958 | 108.776  | 3.7 | 4516.421  | 5.9   | n.a. |
| Total: |        | 2965.591 | 100 | 76619.459 | 100.0 |      |

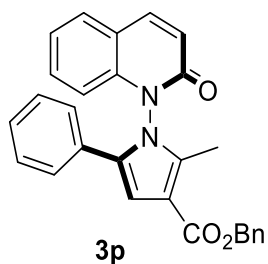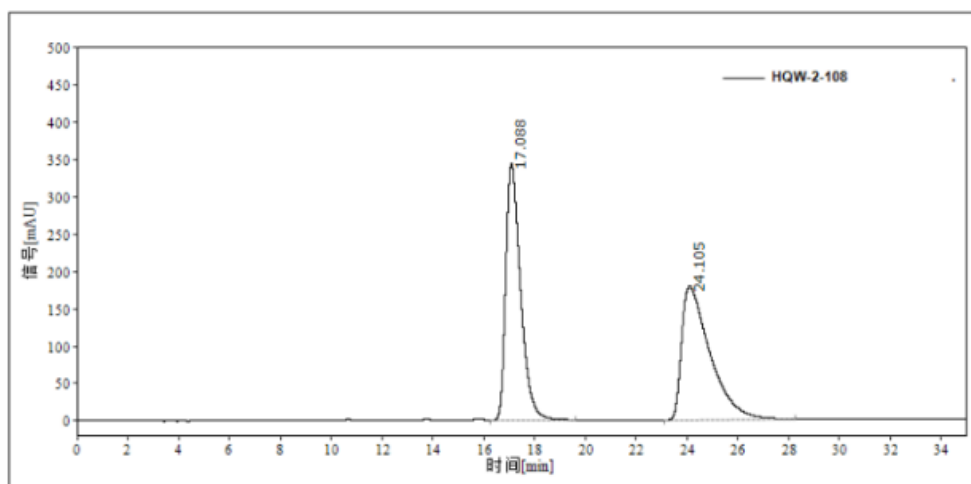

| Integration Results |                      |              |                     |                |                   |             |
|---------------------|----------------------|--------------|---------------------|----------------|-------------------|-------------|
| #                   | Retention time [min] | Height [mAU] | Relative Height [%] | Area [mAU*min] | Relative Area [%] | Amount n.a. |
| 1                   | 17.088               | 344.362      | 65.8                | 13927.176      | 50.1              | n.a.        |
| 2                   | 24.105               | 178.888      | 34.2                | 13898.869      | 49.9              | n.a.        |
| Total:              |                      | 523.250      | 100                 | 27826.045      | 100.0             |             |

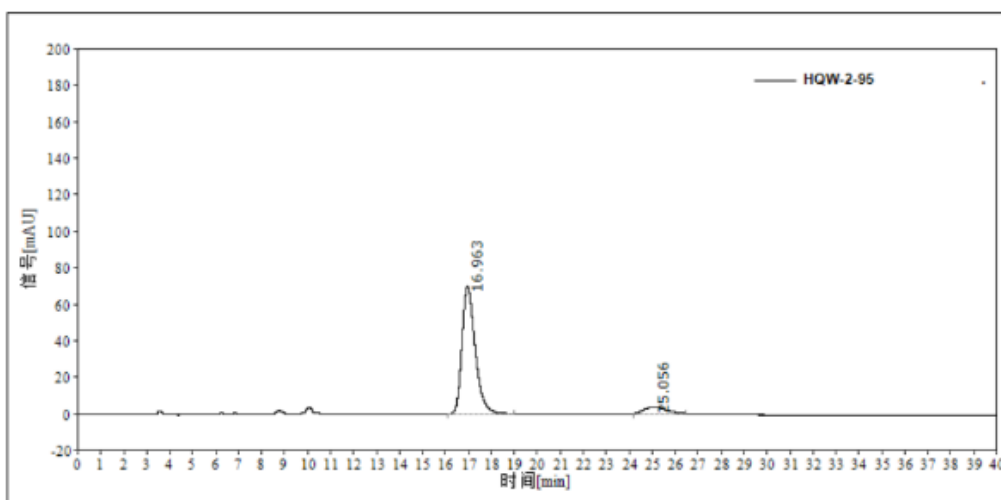

| Integration Results |                      |              |                     |                |                   |             |
|---------------------|----------------------|--------------|---------------------|----------------|-------------------|-------------|
| #                   | Retention time [min] | Height [mAU] | Relative Height [%] | Area [mAU*min] | Relative Area [%] | Amount n.a. |
| 1                   | 16.963               | ~70          | ~100                | ~1180          | ~100              | n.a.        |
| 2                   | 25.056               | ~5           | ~7                  | ~126           | ~11               | n.a.        |

|        |        |        |      |          |       |      |
|--------|--------|--------|------|----------|-------|------|
| 1      | 16.963 | 69.828 | 95.0 | 2813.132 | 92.0  | n.a. |
| 2      | 25.056 | 3.637  | 5.0  | 243.060  | 8.0   | n.a. |
| Total: |        | 73.465 | 100  | 3056.192 | 100.0 |      |

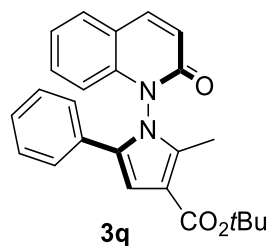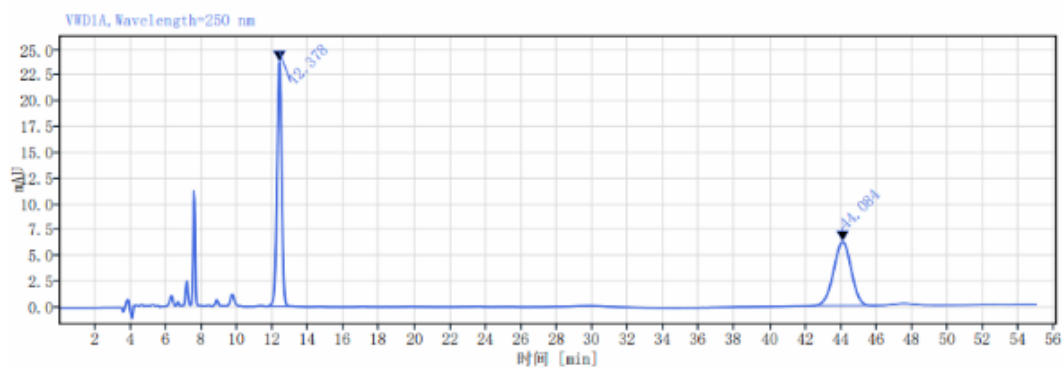

| Integration Results |                      |              |                |                   |             |
|---------------------|----------------------|--------------|----------------|-------------------|-------------|
| #                   | Retention time [min] | Height [mAU] | Area [mAU*min] | Relative Area [%] | Amount n.a. |
| 1                   | 12.378               | 23.7621      | 427.5163       | 49.9685           | n.a.        |
| 2                   | 44.084               | 6.1996       | 428.0554       | 50.0315           | n.a.        |
| Total:              |                      |              | 855.5717       | 100.0             |             |

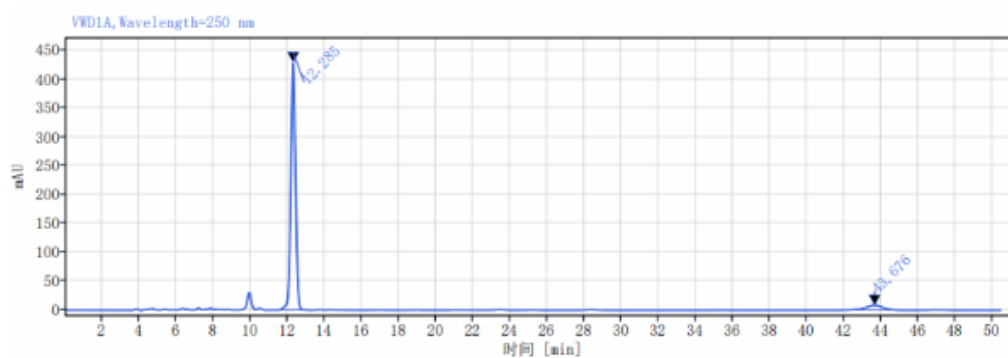

| Integration Results |                      |              |                |                   |             |
|---------------------|----------------------|--------------|----------------|-------------------|-------------|
| #                   | Retention time [min] | Height [mAU] | Area [mAU*min] | Relative Area [%] | Amount n.a. |
| 1                   | 12.285               | 429.0025     | 7621.6976      | 93.2016           | n.a.        |
| 2                   | 43.676               | 8.1162       | 555.9513       | 6.7984            | n.a.        |
| Total:              |                      |              | 8177.6489      | 100.0             |             |

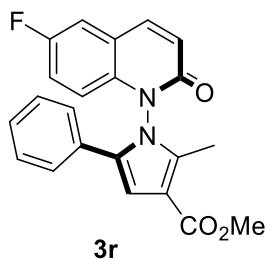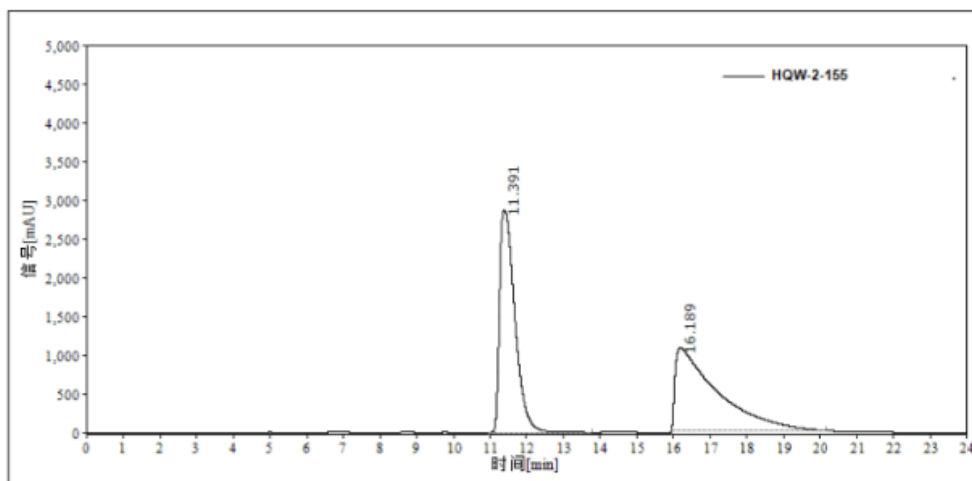

| Integration Results |                      |              |                     |                |                   |             |
|---------------------|----------------------|--------------|---------------------|----------------|-------------------|-------------|
| #                   | Retention time [min] | Height [mAU] | Relative Height [%] | Area [mAU*min] | Relative Area [%] | Amount n.a. |
| 1                   | 11.391               | 2872.453     | 72.9                | 83546.511      | 49.4              | n.a.        |
| 2                   | 16.189               | 1066.368     | 27.1                | 85535.165      | 50.6              | n.a.        |
| Total:              |                      | 3938.821     | 100                 | 169081.676     | 100.0             |             |

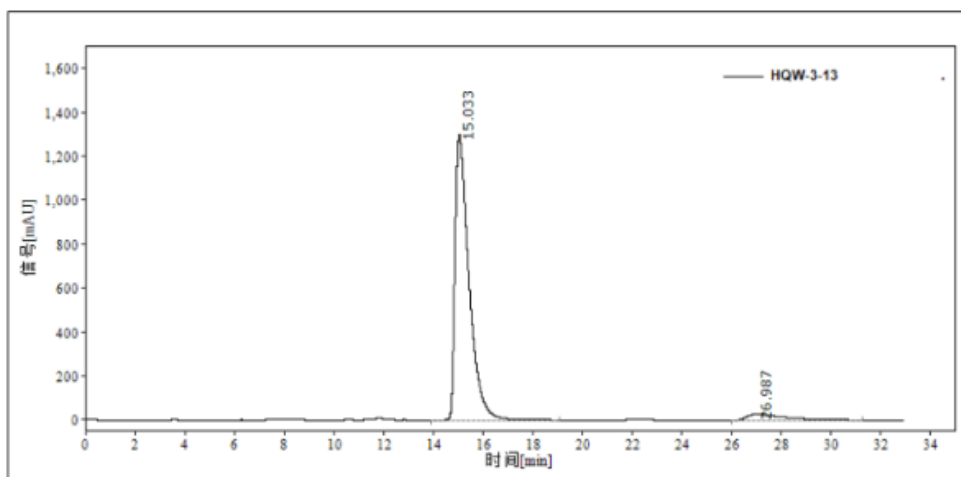

| Integration Results |                      |              |                     |                |                   |             |
|---------------------|----------------------|--------------|---------------------|----------------|-------------------|-------------|
| #                   | Retention time [min] | Height [mAU] | Relative Height [%] | Area [mAU*min] | Relative Area [%] | Amount n.a. |
| 1                   | 15.033               | 1298.979     | 98.0                | 50754.755      | 94.7              | n.a.        |
| 2                   | 26.987               | 25.900       | 2.0                 | 2851.412       | 5.3               | n.a.        |
| Total:              |                      | 1324.879     | 100                 | 53606.167      | 100.0             |             |



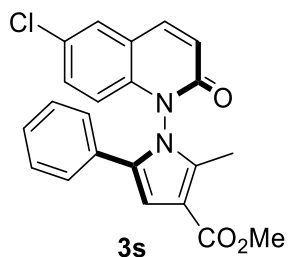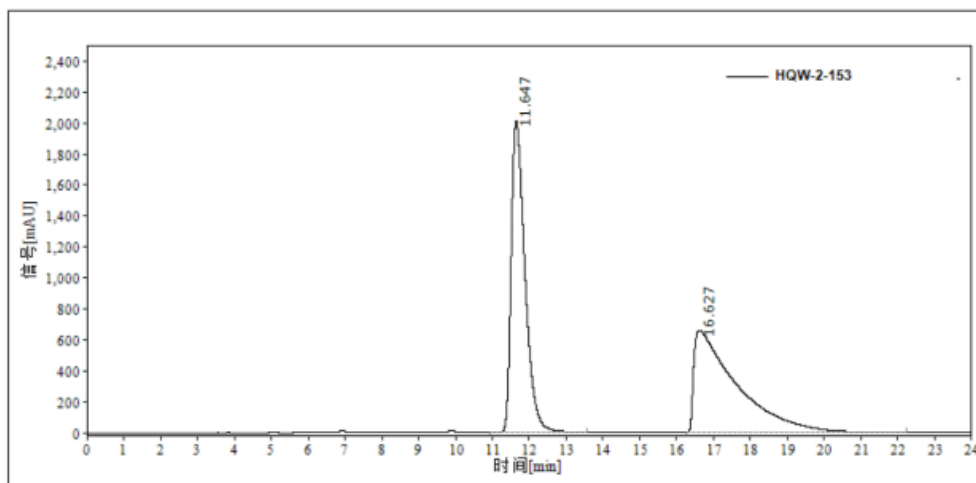

**Integration Results**

| #      | Retention time [min] | Height [mAU] | Relative Height [%] | Area [mAU*min] | Relative Area [%] | Amount n.a. |
|--------|----------------------|--------------|---------------------|----------------|-------------------|-------------|
| 1      | 11.647               | 2009.881     | 75.3                | 52376.611      | 49.5              | n.a.        |
| 2      | 16.627               | 658.206      | 24.7                | 53383.286      | 50.5              | n.a.        |
| Total: |                      | 2668.087     | 100                 | 105759.897     | 100.0             |             |

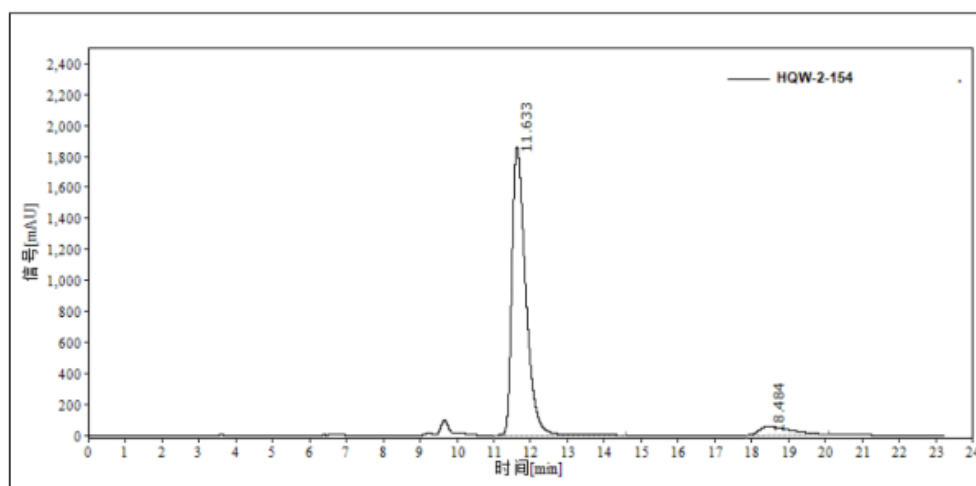

**Integration Results**

| #      | Retention time [min] | Height [mAU] | Relative Height [%] | Area [mAU*min] | Relative Area [%] | Amount n.a. |
|--------|----------------------|--------------|---------------------|----------------|-------------------|-------------|
| 1      | 11.633               | 1866.528     | 97.2                | 48165.811      | 93.8              | n.a.        |
| 2      | 18.484               | 54.353       | 2.8                 | 3167.559       | 6.2               | n.a.        |
| Total: |                      | 1920.881     | 100                 | 51333.370      | 100.0             |             |

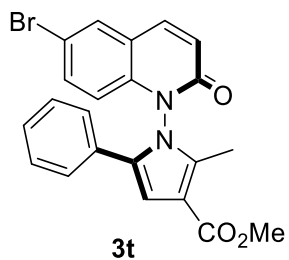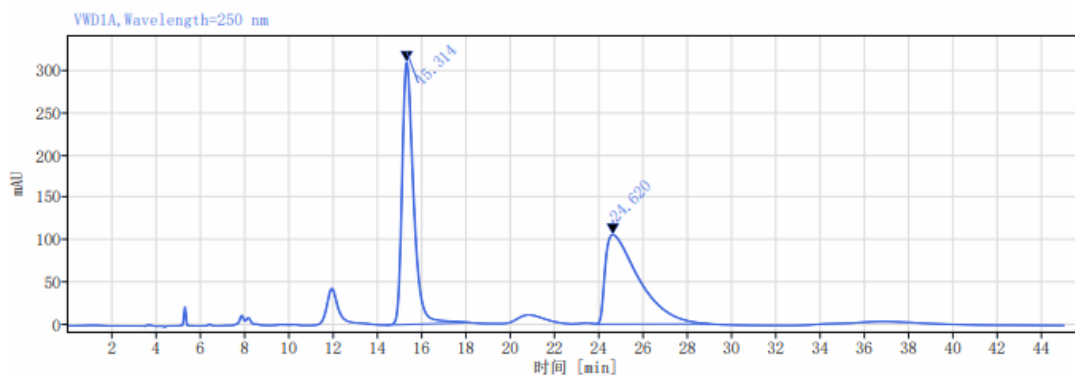

| Integration Results |                      |              |                |                   |        |
|---------------------|----------------------|--------------|----------------|-------------------|--------|
| #                   | Retention time [min] | Height [mAU] | Area [mAU*min] | Relative Area [%] | Amount |
| 1                   | 15.314               | 308.2540     | 11091.3310     | 49.9750           | n.a.   |
| 2                   | 24.620               | 105.1082     | 11102.4460     | 50.0250           | n.a.   |
| Total:              |                      |              | 22193.7771     | 100.0             |        |

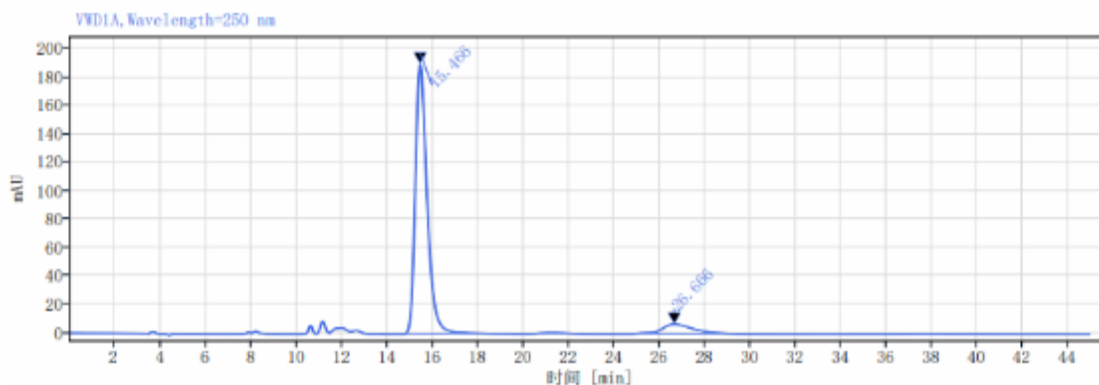

| Integration Results |                      |              |                |                   |        |
|---------------------|----------------------|--------------|----------------|-------------------|--------|
| #                   | Retention time [min] | Height [mAU] | Area [mAU*min] | Relative Area [%] | Amount |
| 1                   | 15.466               | 190.4433     | 6836.2637      | 92.0398           | n.a.   |
| 2                   | 26.666               | 6.5713       | 591.2485       | 7.9602j           | n.a.   |
| Total:              |                      |              | 7427.5123      | 100.0             |        |

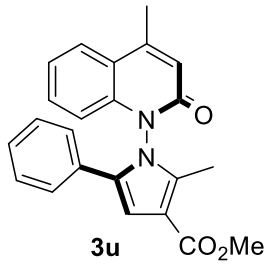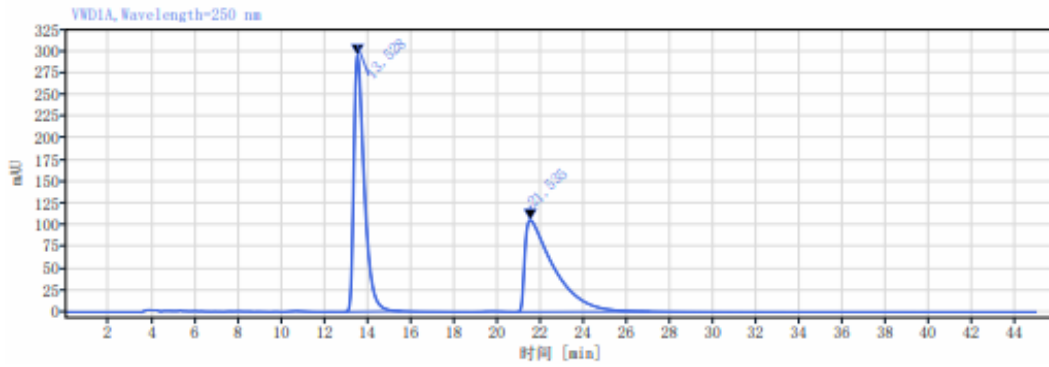

| Integration Results |                      |              |                |                   |             |
|---------------------|----------------------|--------------|----------------|-------------------|-------------|
| #                   | Retention time [min] | Height [mAU] | Area [mAU*min] | Relative Area [%] | Amount n.a. |
| 1                   | 13.528               | 295.1258     | 9908.1450      | 50.1124           | n.a.        |
| 2                   | 21.535               | 105.6745     | 9863.6854      | 49.8878           | n.a.        |
| Total:              |                      |              | 19771.8304     | 100.0             |             |

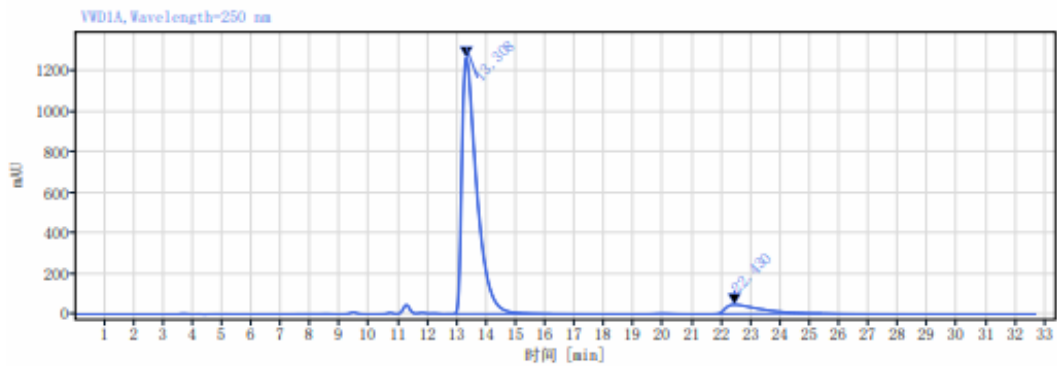

| Integration Results |                      |              |                |                   |             |
|---------------------|----------------------|--------------|----------------|-------------------|-------------|
| #                   | Retention time [min] | Height [mAU] | Area [mAU*min] | Relative Area [%] | Amount n.a. |
| 1                   | 13.308               | 1266.4383    | 44296.0964     | 92.1585           | n.a.        |
| 2                   | 22.430               | 45.8941      | 3769.0477      | 7.8415            | n.a.        |
| Total:              |                      |              | 8177.6489      | 100.0             |             |

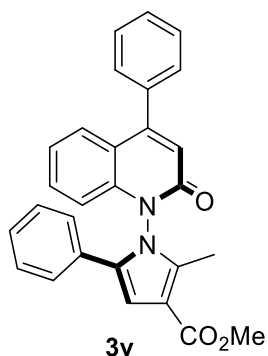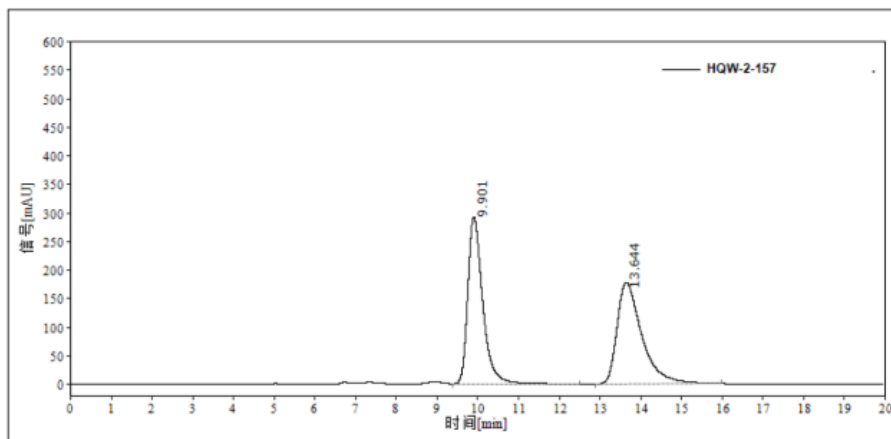

**Integration Results**

| #      | Retention time [min] | Height [mAU] | Relative Height [%] | Area [mAU*min] | Relative Area [%] | Amount |
|--------|----------------------|--------------|---------------------|----------------|-------------------|--------|
| 1      | 9.901                | 292.440      | 62.3                | 7442.900       | 49.8              | n.a.   |
| 2      | 13.644               | 177.140      | 37.7                | 7505.731       | 50.2              | n.a.   |
| Total: |                      | 469.580      | 100                 | 14948.631      | 100.0             |        |

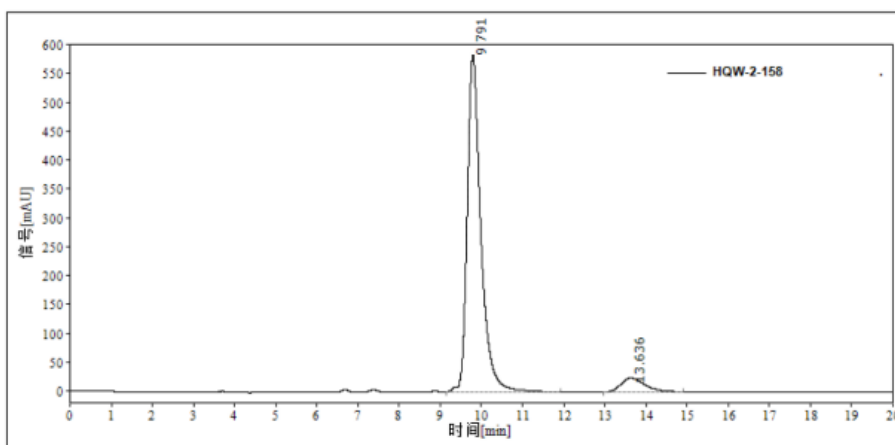

**Integration Results**

| #      | Retention time [min] | Height [mAU] | Relative Height [%] | Area [mAU*min] | Relative Area [%] | Amount |
|--------|----------------------|--------------|---------------------|----------------|-------------------|--------|
| 1      | 9.791                | 583.526      | 96.0                | 13444.933      | 93.2              | n.a.   |
| 2      | 13.636               | 24.068       | 4.0                 | 981.212        | 6.8               | n.a.   |
| Total: |                      | 607.594      | 100                 | 14426.145      | 100.0             |        |

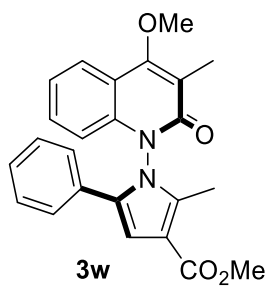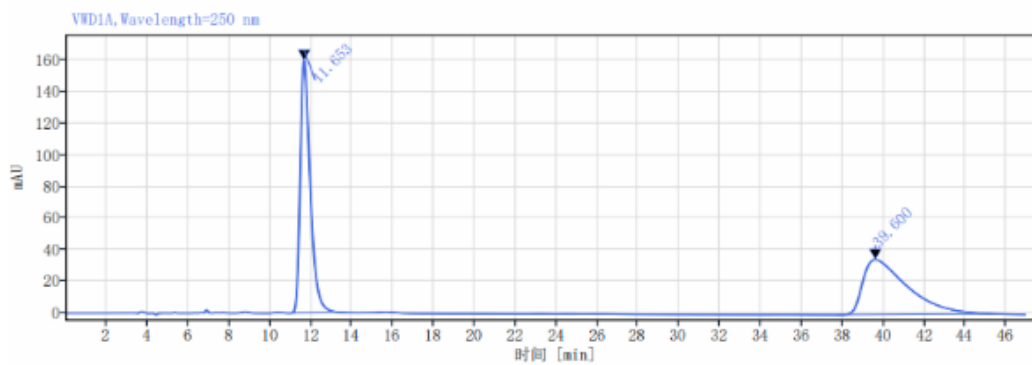

| Integration Results |                      |              |                |                   |             |
|---------------------|----------------------|--------------|----------------|-------------------|-------------|
| #                   | Retention time [min] | Height [mAU] | Area [mAU*min] | Relative Area [%] | Amount n.a. |
| 1                   | 11.653               | 159.7510     | 5410.0696      | 50.7552           | n.a.        |
| 2                   | 39.600               | 34.7642      | 5249.0768      | 49.2448           | n.a.        |
| Total:              |                      | 10659.1464   |                | 100.0             |             |

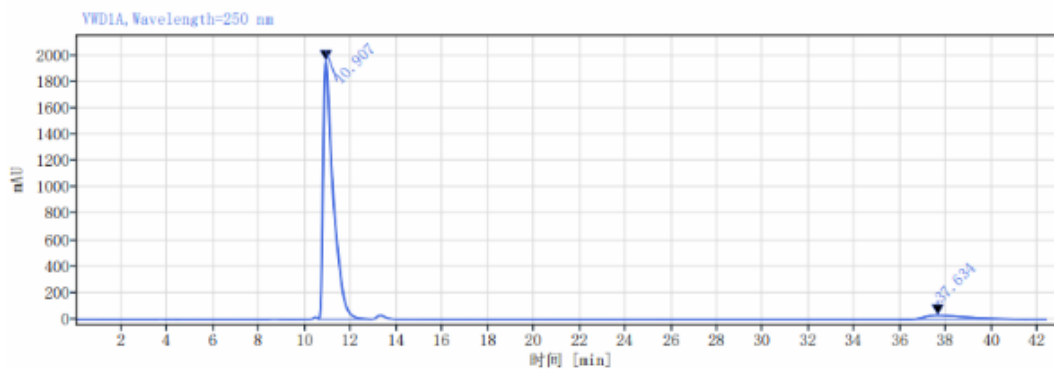

| Integration Results |                      |              |                |                   |             |
|---------------------|----------------------|--------------|----------------|-------------------|-------------|
| #                   | Retention time [min] | Height [mAU] | Area [mAU*min] | Relative Area [%] | Amount n.a. |
| 1                   | 10.907               | 1956.6000    | 60201.6001     | 93.6625           | n.a.        |
| 2                   | 37.634               | 31.0814      | 4073.4583      | 6.3375            | n.a.        |
| Total:              |                      |              | 64275.0581     | 100.0             |             |

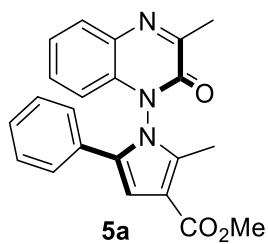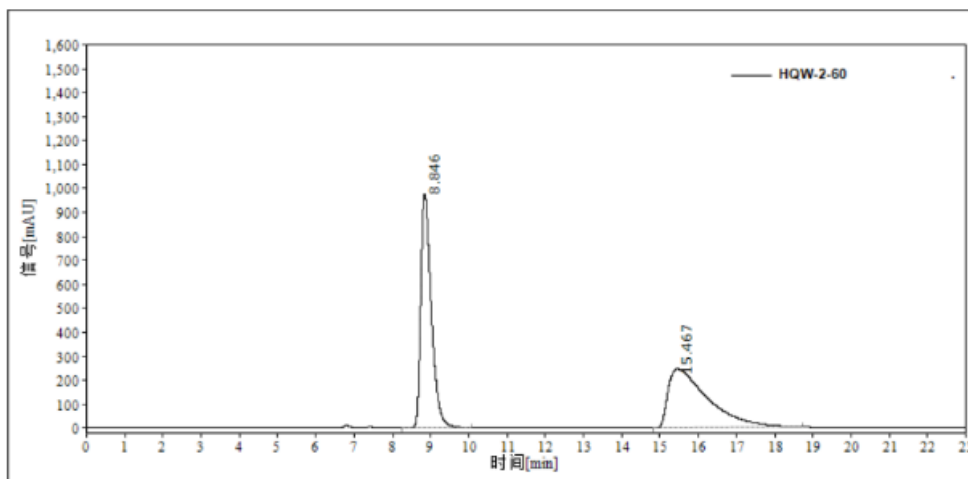

| Integration Results |                      |              |                     |                |                   |             |
|---------------------|----------------------|--------------|---------------------|----------------|-------------------|-------------|
| #                   | Retention time [min] | Height [mAU] | Relative Height [%] | Area [mAU*min] | Relative Area [%] | Amount n.a. |
| 1                   | 8.846                | 977.057      | 79.9                | 18653.071      | 50.9              | n.a.        |
| 2                   | 15.467               | 246.196      | 20.1                | 17967.676      | 49.1              | n.a.        |
| Total:              |                      | 1223.253     | 100                 | 36620.747      | 100.0             |             |

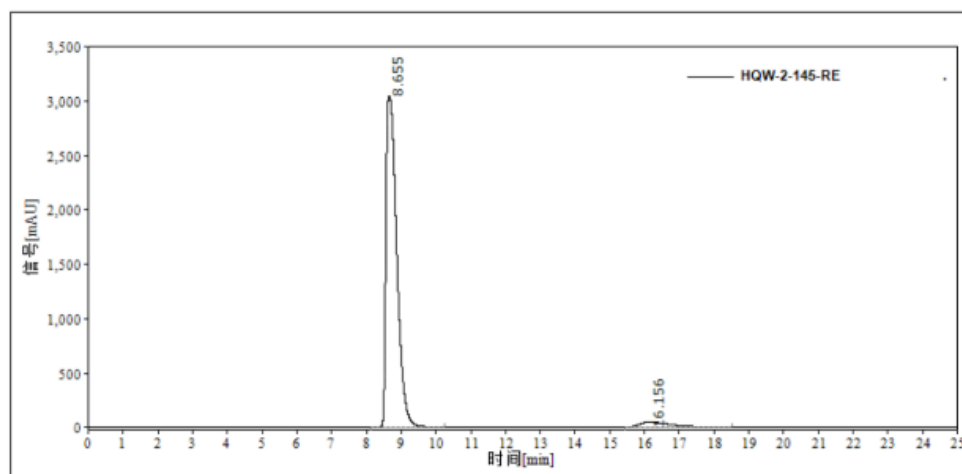

| Integration Results |                      |              |                     |                |                   |             |
|---------------------|----------------------|--------------|---------------------|----------------|-------------------|-------------|
| #                   | Retention time [min] | Height [mAU] | Relative Height [%] | Area [mAU*min] | Relative Area [%] | Amount n.a. |
| 1                   | 8.655                | 3048.798     | 98.4                | 65516.687      | 95.3              | n.a.        |
| 2                   | 16.156               | 49.670       | 1.6                 | 3242.756       | 4.7               | n.a.        |
| Total:              |                      | 3098.468     | 100                 | 68759.443      | 100.0             |             |

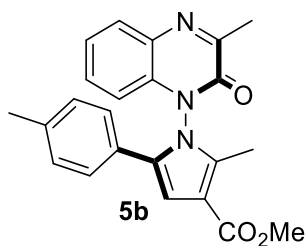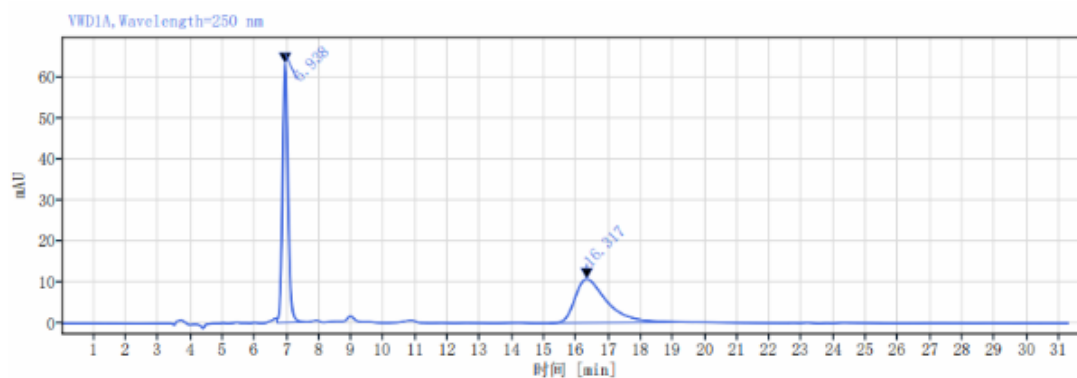

| Integration Results |                      |              |                |                   |        |
|---------------------|----------------------|--------------|----------------|-------------------|--------|
| #                   | Retention time [min] | Height [mAU] | Area [mAU*min] | Relative Area [%] | Amount |
| 1                   | 6.938                | 63.3407      | 746.7500       | 49.9631           | n.a.   |
| 2                   | 16.317               | 10.7054      | 747.8515       | 50.0369           | n.a.   |
| Total:              |                      |              | 1494.6015      | 100.0             |        |

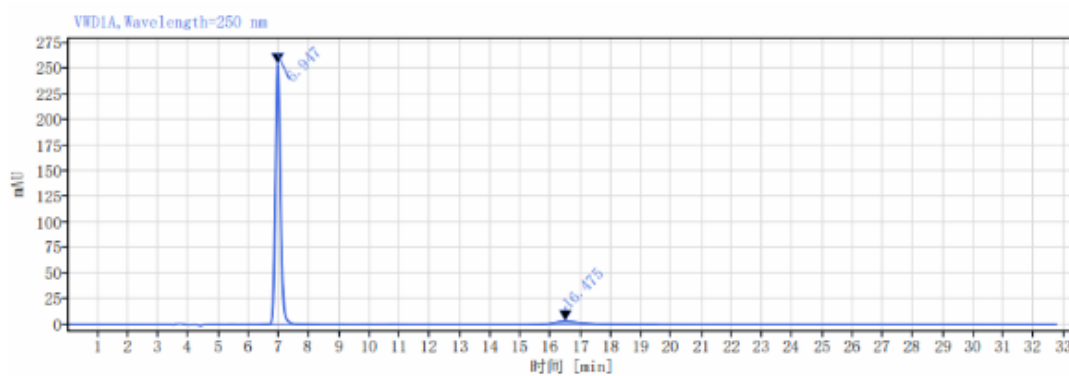

| Integration Results |                      |              |                |                   |        |
|---------------------|----------------------|--------------|----------------|-------------------|--------|
| #                   | Retention time [min] | Height [mAU] | Area [mAU*min] | Relative Area [%] | Amount |
| 1                   | 6.947                | 254.7298     | 2974.4030      | 93.0027           | n.a.   |
| 2                   | 16.475               | 3.0913       | 223.7874       | 6.9973            | n.a.   |
| Total:              |                      |              | 3198.1904      | 100.0             |        |

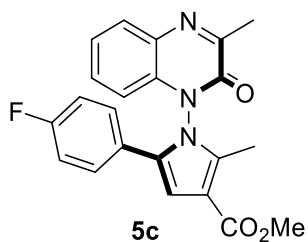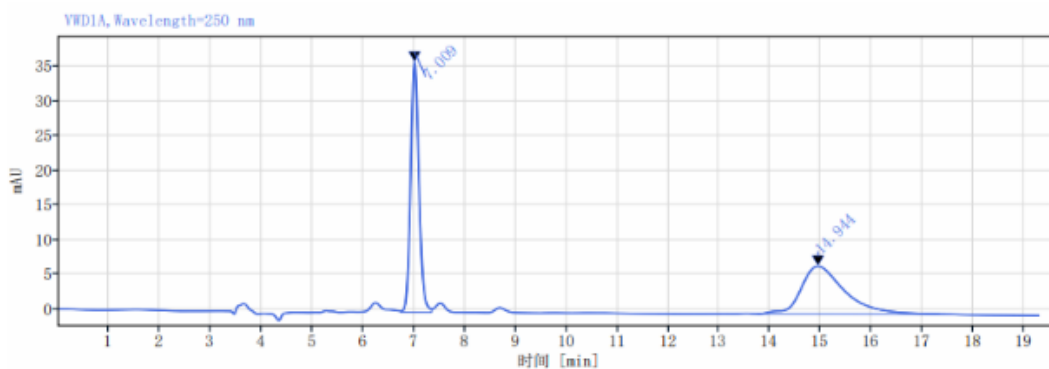

| Integration Results |                      |              |                |                   |        |
|---------------------|----------------------|--------------|----------------|-------------------|--------|
| #                   | Retention time [min] | Height [mAU] | Area [mAU*min] | Relative Area [%] | Amount |
| 1                   | 7.009                | 36.1059      | 409.5320       | 50.0420           | n.a.   |
| 2                   | 14.944               | 6.9037       | 408.8453       | 49.9580           | n.a.   |
| Total:              |                      |              | 818.3772       | 100.0             |        |

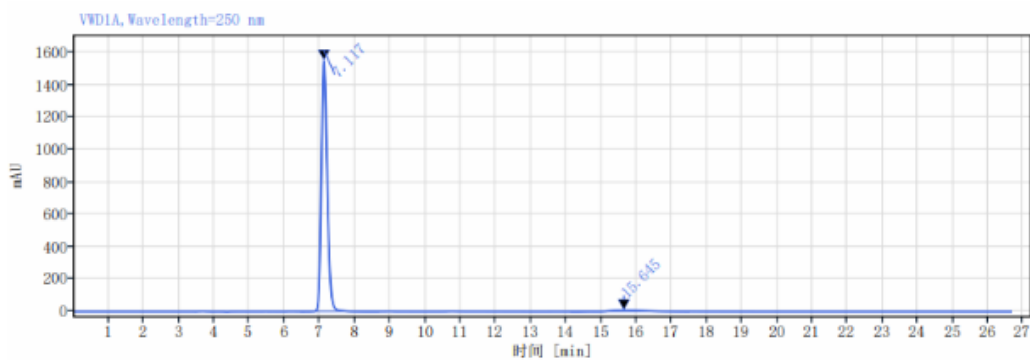

| Integration Results |                      |              |                |                   |        |
|---------------------|----------------------|--------------|----------------|-------------------|--------|
| #                   | Retention time [min] | Height [mAU] | Area [mAU*min] | Relative Area [%] | Amount |
| 1                   | 7.117                | 1552.4404    | 18094.8107     | 96.8600           | n.a.   |
| 2                   | 15.645               | 9.0979       | 586.5962       | 3.1400            | n.a.   |
| Total:              |                      |              | 18681.4070     | 100.0             |        |



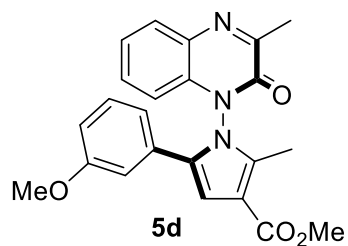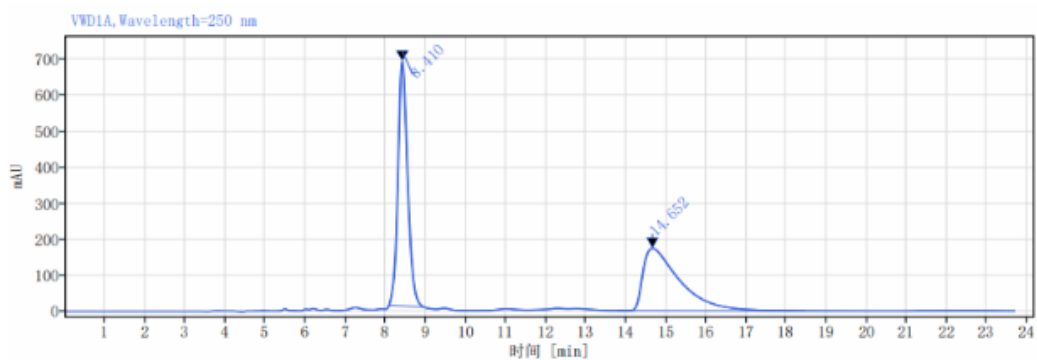

| Integration Results |                      |              |                |                   |        |
|---------------------|----------------------|--------------|----------------|-------------------|--------|
| #                   | Retention time [min] | Height [mAU] | Area [mAU*min] | Relative Area [%] | Amount |
| 1                   | 8.410                | 681.3107     | 11433.8246     | 50.9011           | n.a.   |
| 2                   | 14.652               | 173.7478     | 11029.0133     | 49.0989           | n.a.   |
| Total:              |                      |              | 22462.8379     | 100.0             |        |

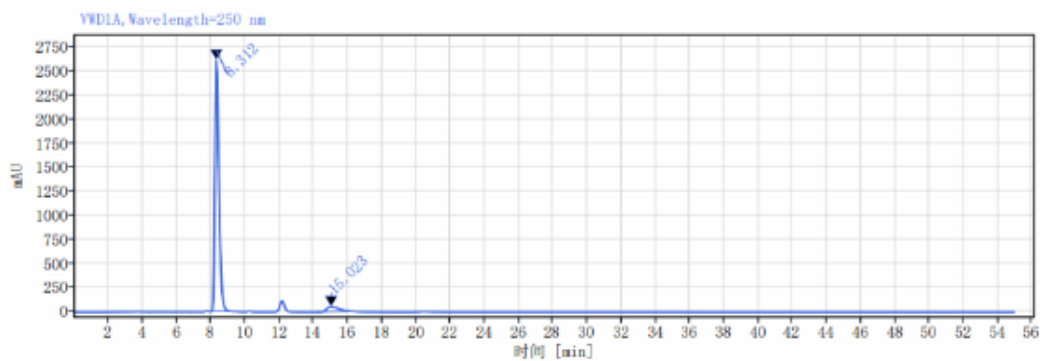

| Integration Results |                      |              |                |                   |        |
|---------------------|----------------------|--------------|----------------|-------------------|--------|
| #                   | Retention time [min] | Height [mAU] | Area [mAU*min] | Relative Area [%] | Amount |
| 1                   | 8.312                | 2616.3857    | 42794.0095     | 94.0126           | n.a.   |
| 2                   | 15.023               | 51.8281      | 2725.4348      | 5.9874            | n.a.   |
| Total:              |                      |              | 45519.4443     | 100.0             |        |

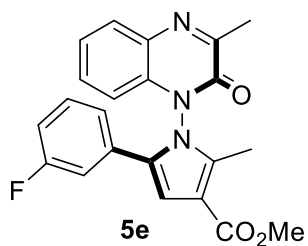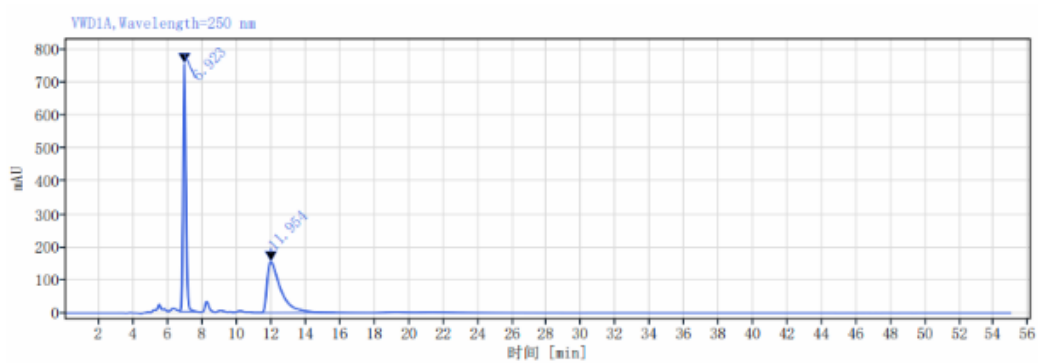

| Integration Results |                      |              |                |                   |        |
|---------------------|----------------------|--------------|----------------|-------------------|--------|
| #                   | Retention time [min] | Height [mAU] | Area [mAU*min] | Relative Area [%] | Amount |
| 1                   | 6.923                | 754.2580     | 8559.6870      | 50.3019           | n.a.   |
| 2                   | 11.954               | 154.4596     | 8456.9445      | 49.6981           | n.a.   |
| Total:              |                      |              | 17016.6315     | 100.0             |        |

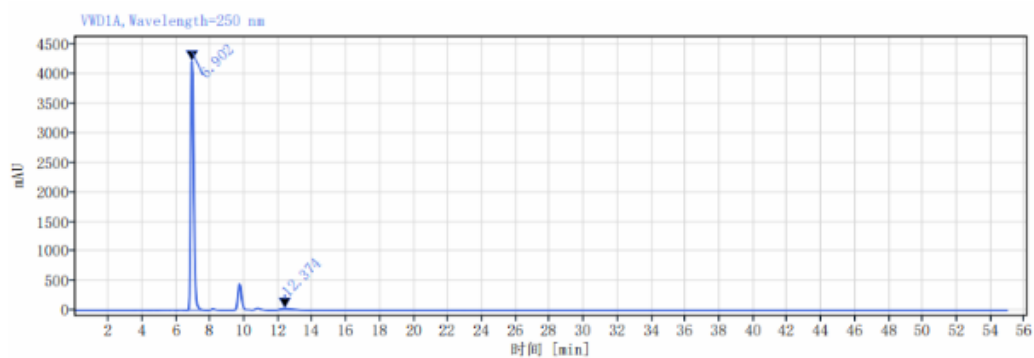

| Integration Results |                      |              |                |                   |        |
|---------------------|----------------------|--------------|----------------|-------------------|--------|
| #                   | Retention time [min] | Height [mAU] | Area [mAU*min] | Relative Area [%] | Amount |
| 1                   | 6.902                | 4223.8835    | 52666.5315     | 97.2154           | n.a.   |
| 2                   | 12.374               | 30.1210      | 1508.5644      | 2.7846            | n.a.   |
| Total:              |                      |              | 54175.0959     | 100.0             |        |

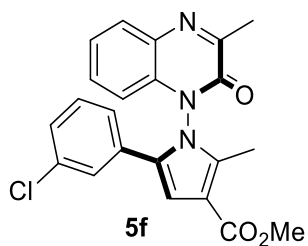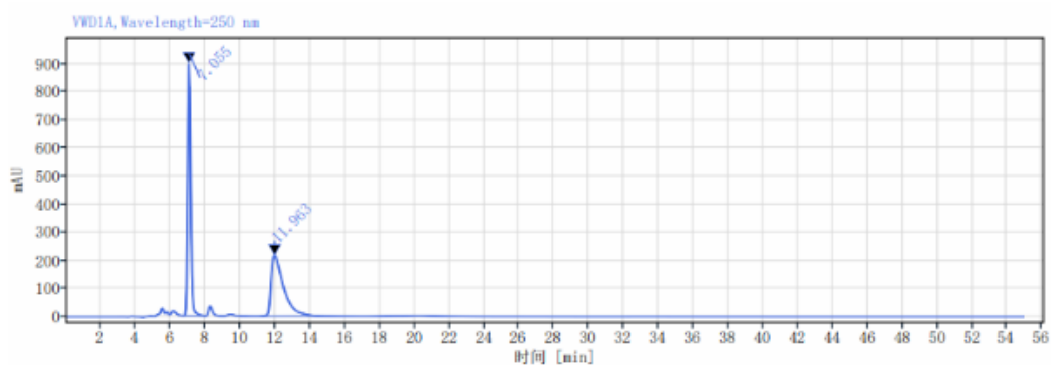

| Integration Results |                      |              |                |                   |        |
|---------------------|----------------------|--------------|----------------|-------------------|--------|
| #                   | Retention time [min] | Height [mAU] | Area [mAU*min] | Relative Area [%] | Amount |
| 1                   | 7.055                | 898.3779     | 10727.8356     | 49.9296           | n.a.   |
| 2                   | 11.963               | 216.7728     | 10758.0936     | 50.0704           | n.a.   |
| Total:              |                      |              | 21485.9292     | 100.0             |        |

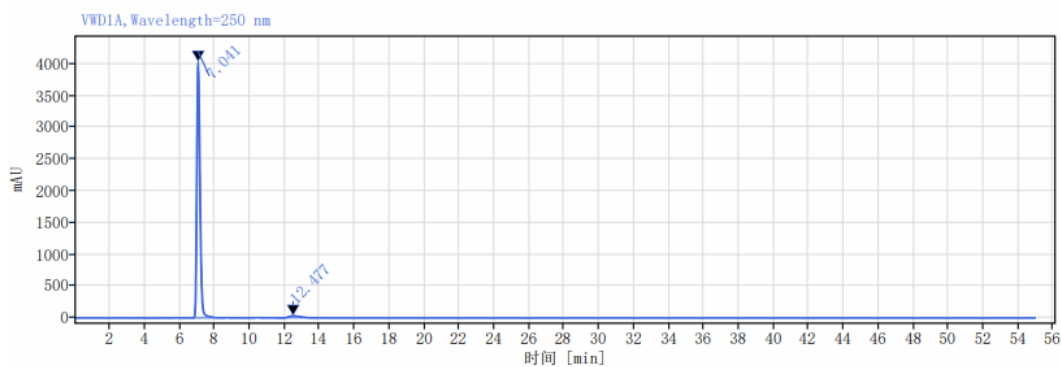

| Integration Results |                      |              |                |                   |        |
|---------------------|----------------------|--------------|----------------|-------------------|--------|
| #                   | Retention time [min] | Height [mAU] | Area [mAU*min] | Relative Area [%] | Amount |
| 1                   | 7.041                | 4039.0229    | 51083.4185     | 97.0692           | n.a.   |
| 2                   | 12.477               | 33.6634      | 1542.3607      | 2.9308            | n.a.   |
| Total:              |                      |              | 52625.7792     | 100.0             |        |

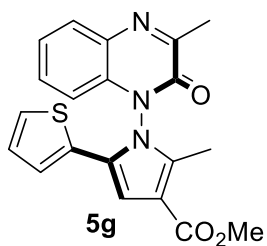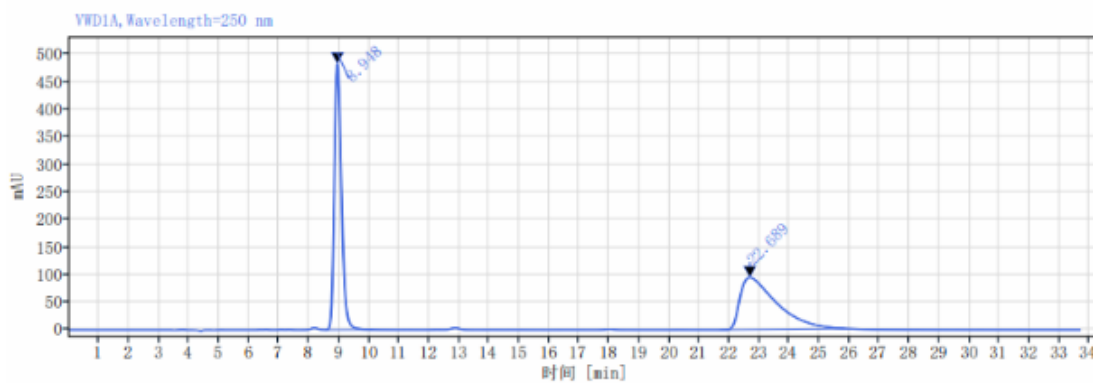

| Integration Results |                      |              |                |                   |        |
|---------------------|----------------------|--------------|----------------|-------------------|--------|
| #                   | Retention time [min] | Height [mAU] | Area [mAU*min] | Relative Area [%] | Amount |
| 1                   | 8.948                | 482.4462     | 7965.1127      | 49.9827           | n.a.   |
| 2                   | 22.689               | 94.3576      | 7970.6415      | 50.0173           | n.a.   |
| Total:              |                      |              | 15935.7542     | 100.0             |        |

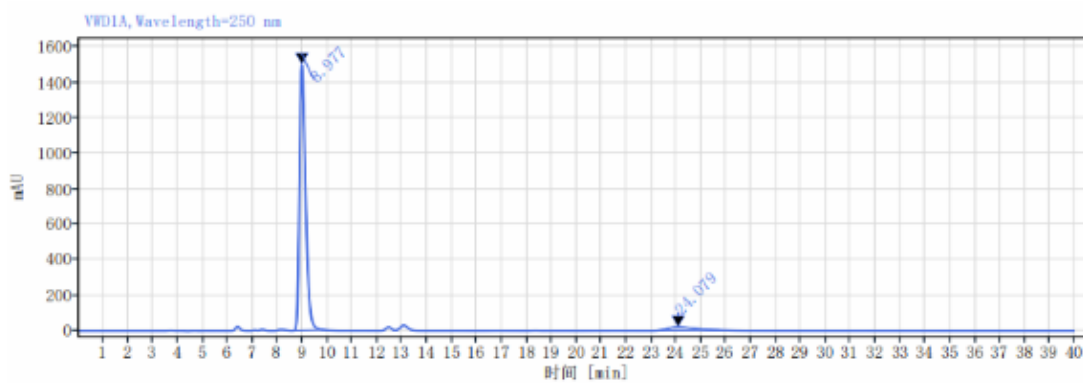

| Integration Results |                      |              |                |                   |        |
|---------------------|----------------------|--------------|----------------|-------------------|--------|
| #                   | Retention time [min] | Height [mAU] | Area [mAU*min] | Relative Area [%] | Amount |
| 1                   | 8.977                | 1499.9790    | 25478.5809     | 95.1783           | n.a.   |
| 2                   | 24.079               | 17.6977      | 1290.7278      | 4.8217            | n.a.   |
| Total:              |                      |              | 26769.3086     | 100.0             |        |

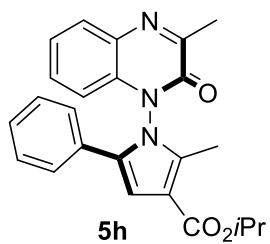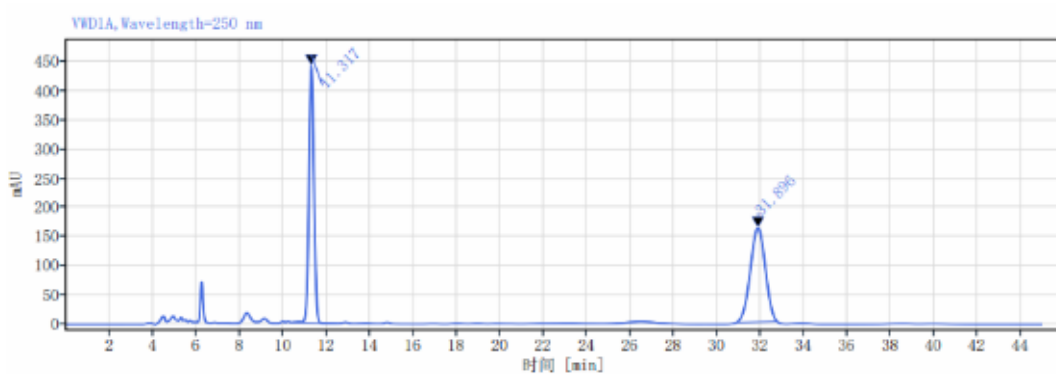

| Integration Results |                      |              |                |                   |        |
|---------------------|----------------------|--------------|----------------|-------------------|--------|
| #                   | Retention time [min] | Height [mAU] | Area [mAU*min] | Relative Area [%] | Amount |
| 1                   | 11.317               | 441.8860     | 7021.0275      | 47.5623           | n.a.   |
| 2                   | 31.896               | 161.6398     | 7740.7278      | 52.4377           | n.a.   |
| Total:              |                      |              | 14761.7553     | 100.0             |        |

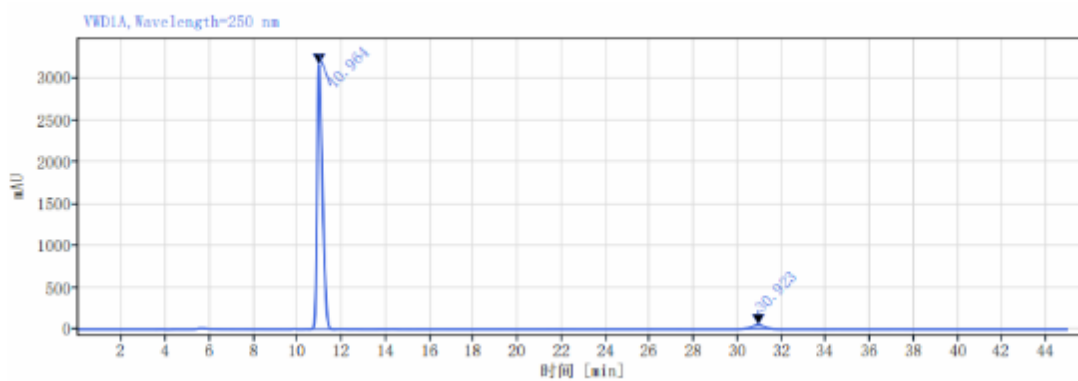

| Integration Results |                      |              |                |                   |        |
|---------------------|----------------------|--------------|----------------|-------------------|--------|
| #                   | Retention time [min] | Height [mAU] | Area [mAU*min] | Relative Area [%] | Amount |
| 1                   | 10.964               | 3169.4355    | 53028.4281     | 96.2500           | n.a.   |
| 2                   | 30.923               | 47.7779      | 2066.0272      | 3.7500            | n.a.   |
| Total:              |                      |              | 55094.4553     | 100.0             |        |

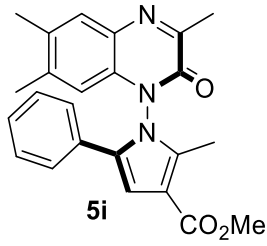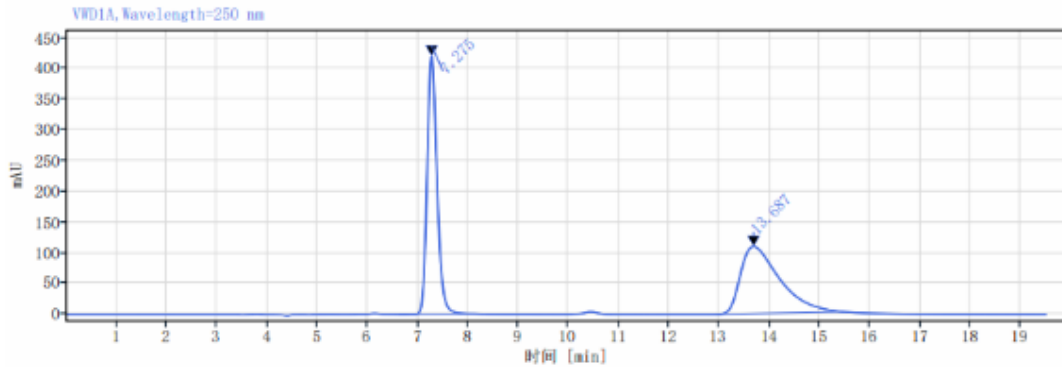

| Integration Results |                      |              |                |                   |        |
|---------------------|----------------------|--------------|----------------|-------------------|--------|
| #                   | Retention time [min] | Height [mAU] | Area [mAU*min] | Relative Area [%] | Amount |
| 1                   | 7.275                | 419.8207     | 5768.3423      | 49.3694           | n.a.   |
| 2                   | 13.687               | 109.1021     | 5915.7048      | 50.6306           | n.a.   |
| Total:              |                      |              | 11684.0472     | 100.0             |        |

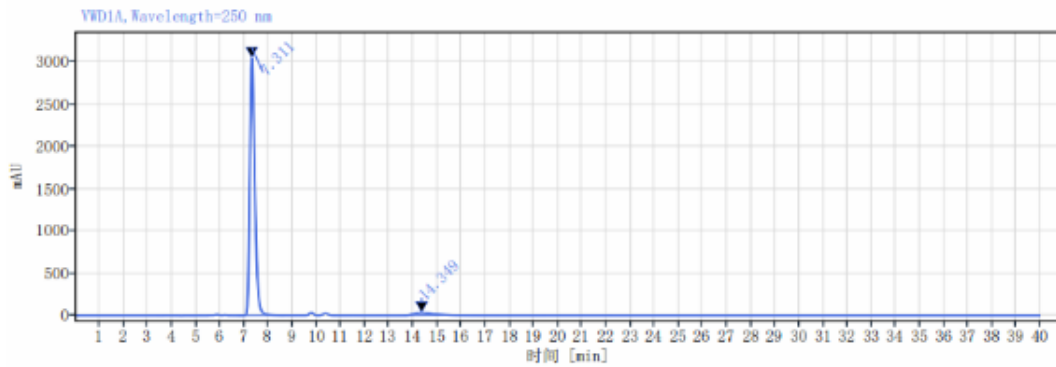

| Integration Results |                      |              |                |                   |        |
|---------------------|----------------------|--------------|----------------|-------------------|--------|
| #                   | Retention time [min] | Height [mAU] | Area [mAU*min] | Relative Area [%] | Amount |
| 1                   | 7.311                | 3049.2228    | 44028.4355     | 96.5182           | n.a.   |
| 2                   | 14.349               | 30.5310      | 1588.3028      | 3.4818            | n.a.   |
| Total:              |                      |              | 45616.7383     | 100.0             |        |

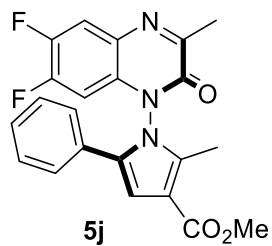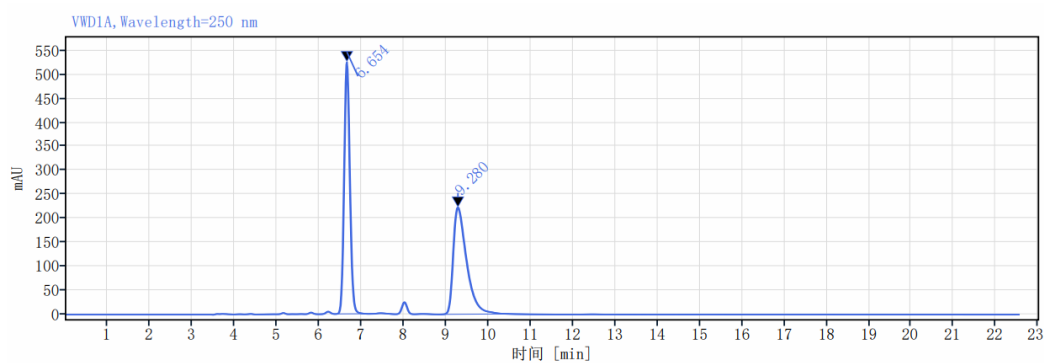

| Integration Results |                      |              |                |                   |        |
|---------------------|----------------------|--------------|----------------|-------------------|--------|
| #                   | Retention time [min] | Height [mAU] | Area [mAU*min] | Relative Area [%] | Amount |
| 1                   | 6.654                | 524.8013     | 4927.7546      | 50.2214           | n.a.   |
| 2                   | 9.280                | 222.5893     | 4884.3014v     | 49.7786           | n.a.   |
| Total:              |                      |              | 9812.0561      | 100.0             |        |

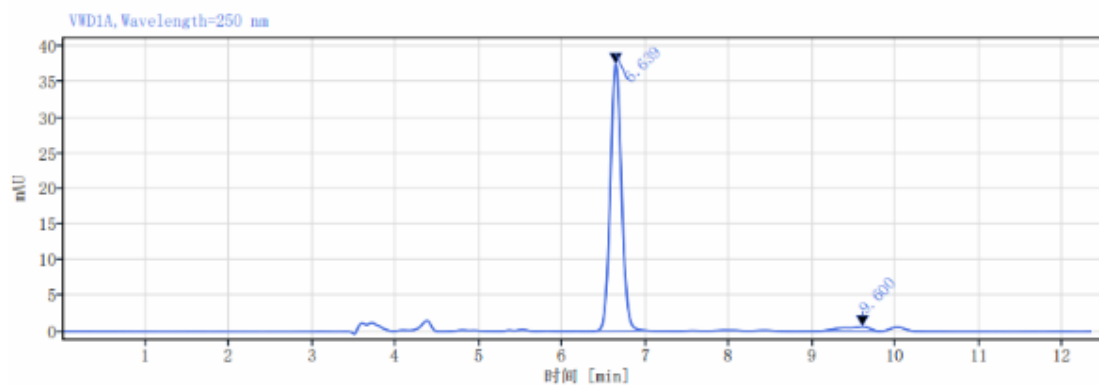

| Integration Results |                      |              |                |                   |        |
|---------------------|----------------------|--------------|----------------|-------------------|--------|
| #                   | Retention time [min] | Height [mAU] | Area [mAU*min] | Relative Area [%] | Amount |
| 1                   | 6.639                | 37.4358      | 349.3269       | 96.0039           | n.a.   |
| 2                   | 9.600                | 0.6323       | 14.5406        | 3.9961            | n.a.   |
| Total:              |                      |              | 363.8675       | 100.0             |        |

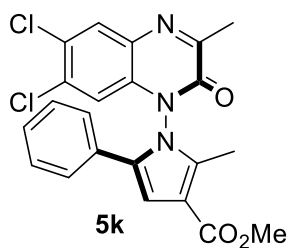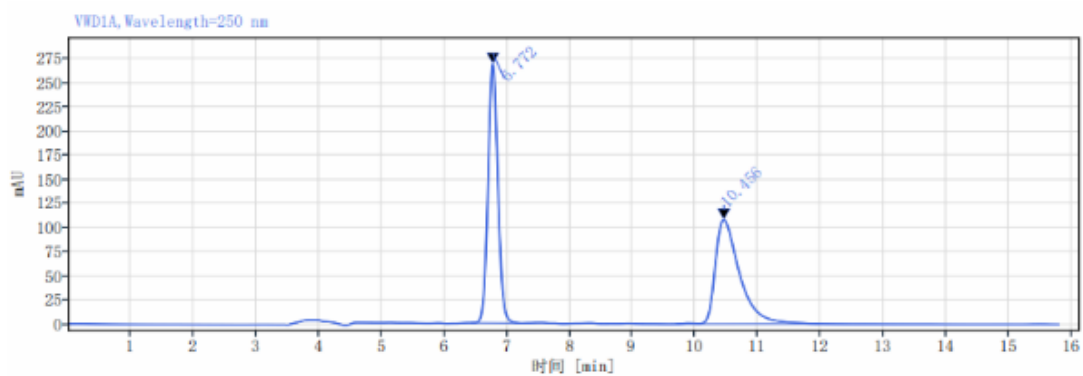

| Integration Results |                      |              |                |                   |             |
|---------------------|----------------------|--------------|----------------|-------------------|-------------|
| #                   | Retention time [min] | Height [mAU] | Area [mAU*min] | Relative Area [%] | Amount n.a. |
| 1                   | 0.7622               | 268.9715     | 2937.9258      | 50.2137           | n.a.        |
| 2                   | 2.2976               | 108.1154     | 2912.9140      | 49.7863           | n.a.        |
| Total:              |                      |              | 5850.8398      | 100.0             |             |

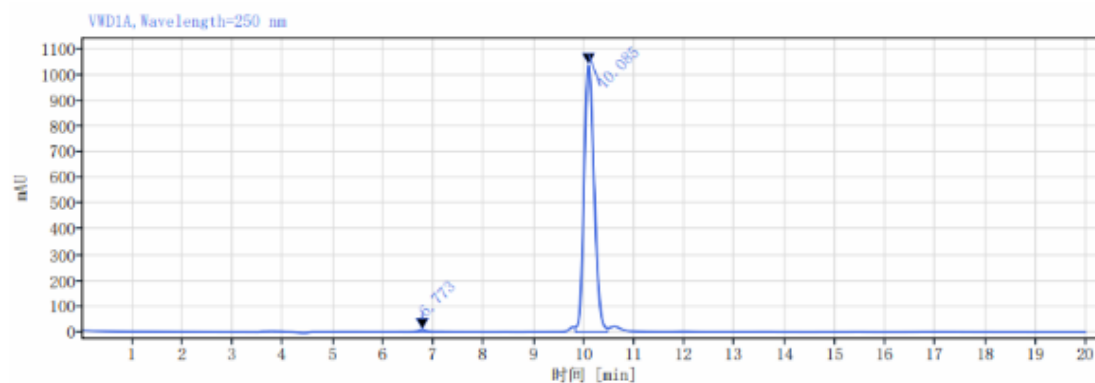

| Integration Results |                      |              |                |                   |             |
|---------------------|----------------------|--------------|----------------|-------------------|-------------|
| #                   | Retention time [min] | Height [mAU] | Area [mAU*min] | Relative Area [%] | Amount n.a. |
| 1                   | 6.773                | 9.3027       | 96.7654        | 0.6573            | n.a.        |
| 2                   | 10.085               | 1043.2557    | 14624.0630     | 99.3427           | n.a.        |
| Total:              |                      |              | 14720.8284     | 100.0             |             |



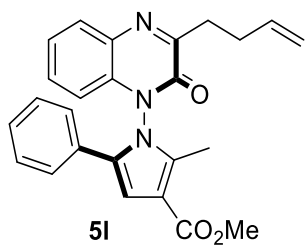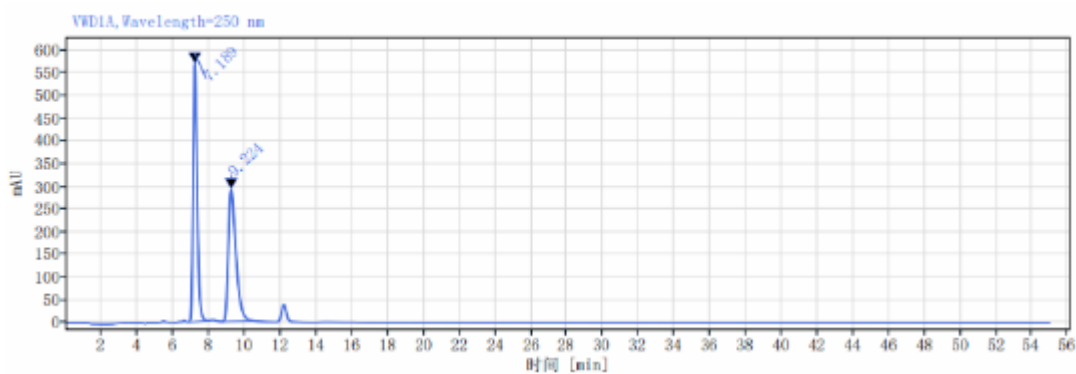

| Integration Results |                      |              |                |                   |             |
|---------------------|----------------------|--------------|----------------|-------------------|-------------|
| #                   | Retention time [min] | Height [mAU] | Area [mAU*min] | Relative Area [%] | Amount n.a. |
| 1                   | 7.189                | 568.2935     | 8765.4597      | 50.3546           | n.a.        |
| 2                   | 9.224                | 291.0774     | 8641.9917      | 49.6454           | n.a.        |
| Total:              |                      |              | 17407.4514     | 100.0             |             |

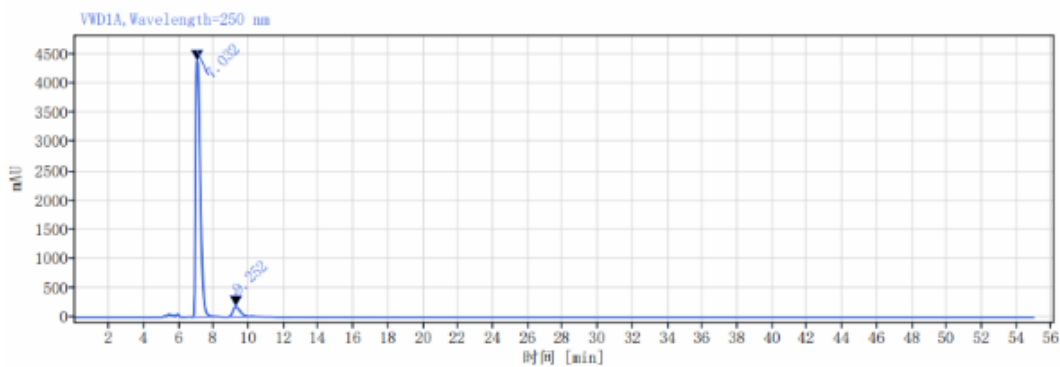

| Integration Results |                      |              |                |                   |             |
|---------------------|----------------------|--------------|----------------|-------------------|-------------|
| #                   | Retention time [min] | Height [mAU] | Area [mAU*min] | Relative Area [%] | Amount n.a. |
| 1                   | 7.032                | 4387.0746    | 81538.3343     | 94.1835           | n.a.        |
| 2                   | 9.252                | 173.0436     | 5035.5593      | 5.8165            | n.a.        |
| Total:              |                      |              | 86573.8936     | 100.0             |             |

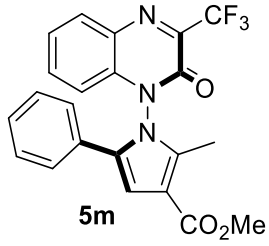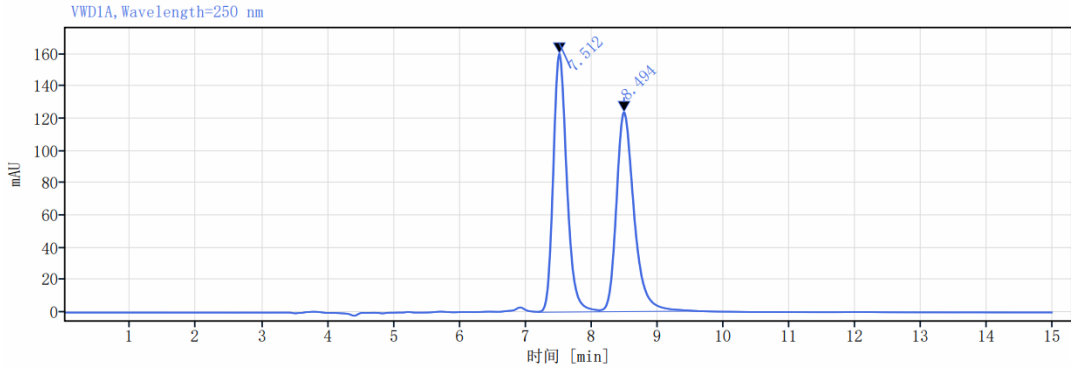

| Integration Results |                      |              |                |                   |        |
|---------------------|----------------------|--------------|----------------|-------------------|--------|
| #                   | Retention time [min] | Height [mAU] | Area [mAU*min] | Relative Area [%] | Amount |
| 1                   | 7.512                | 160.2102     | 2297.7527      | 49.8768           | n.a.   |
| 2                   | 8.494                | 123.5651     | 2309.1046      | 50.1232           | n.a.   |
| Total:              |                      |              | 4606.8572      | 100.0             |        |

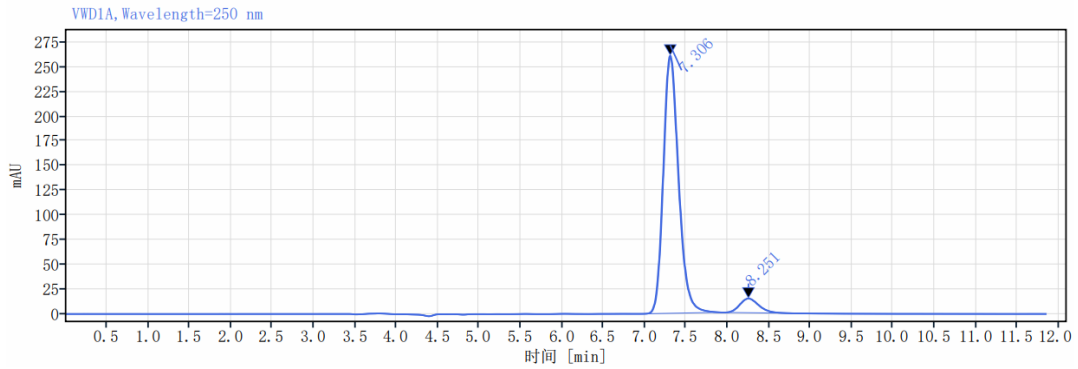

| Integration Results |                      |              |                |                   |        |
|---------------------|----------------------|--------------|----------------|-------------------|--------|
| #                   | Retention time [min] | Height [mAU] | Area [mAU*min] | Relative Area [%] | Amount |
| 1                   | 7.306                | 261.1420     | 3350.1005      | 93.5357           | n.a.   |
| 2                   | 8.251                | 14.3890      | 231.5267       | 6.4643            | n.a.   |
| Total:              |                      |              | 3581.6272      | 100.0             |        |

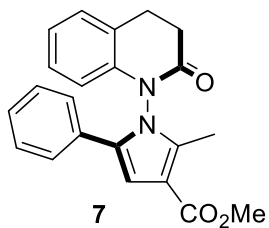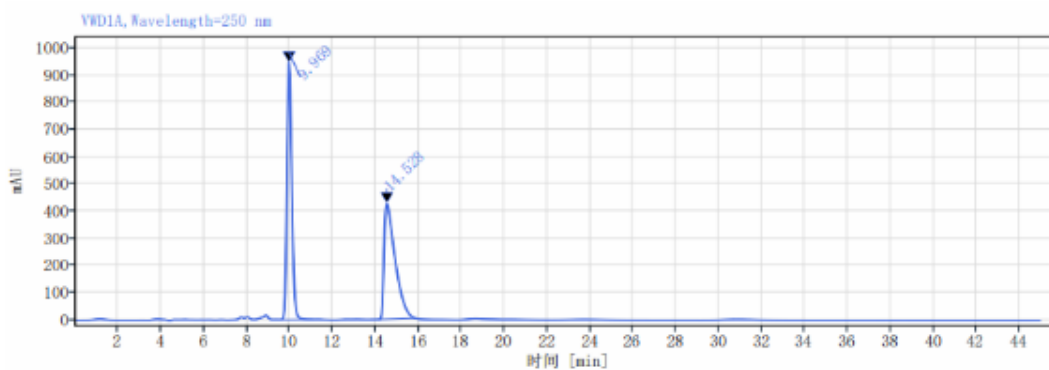

| Integration Results |                      |              |                |                   |        |
|---------------------|----------------------|--------------|----------------|-------------------|--------|
| #                   | Retention time [min] | Height [mAU] | Area [mAU*min] | Relative Area [%] | Amount |
| 1                   | 9.969                | 946.5972     | 14737.3247     | 49.1658           | n.a.   |
| 2                   | 14.528               | 426.1587     | 15237.4311     | 50.8342           | n.a.   |
| Total:              |                      |              | 29974.7558     | 100.0             |        |

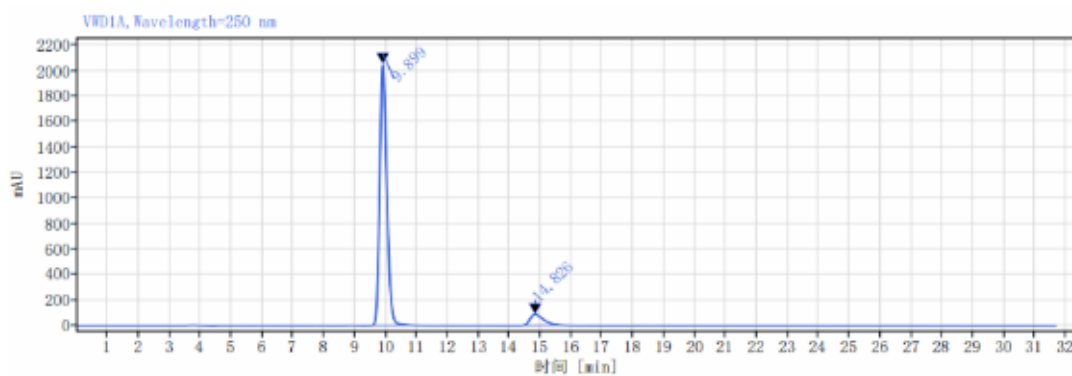

| Integration Results |                      |              |                |                   |        |
|---------------------|----------------------|--------------|----------------|-------------------|--------|
| #                   | Retention time [min] | Height [mAU] | Area [mAU*min] | Relative Area [%] | Amount |
| 1                   | 9.899                | 2051.1362    | 32575.1033     | 92.7547           | n.a.   |
| 2                   | 14.826               | 85.2594      | 2544.5102      | 7.2453            | n.a.   |
| Total:              |                      |              | 35119.6134     | 100.0             |        |

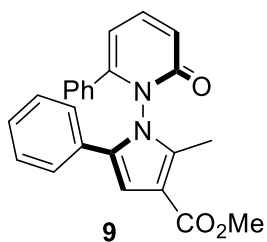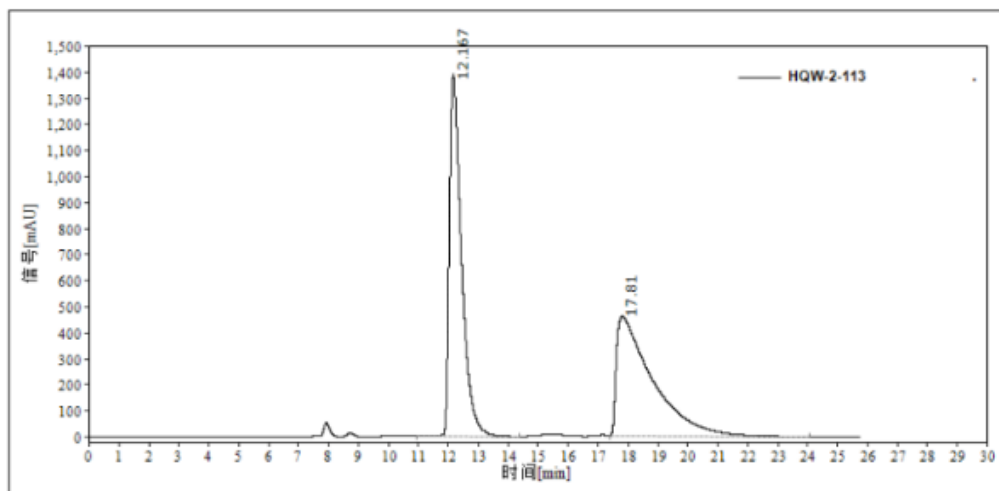

#### Integration Results

| #      | Retention time [min] | Height [mAU] | Relative Height [%] | Area [mAU*min] | Relative Area [%] | Amount |
|--------|----------------------|--------------|---------------------|----------------|-------------------|--------|
| 1      | 12,167               | 1389.542     | 75.2                | 39428.910      | 50.8              | n.a.   |
| 2      | 17.810               | 457.522      | 24.8                | 38208.609      | 49.2              | n.a.   |
| Total: |                      | 1847.064     | 100                 | 77637.519      | 100.0             |        |

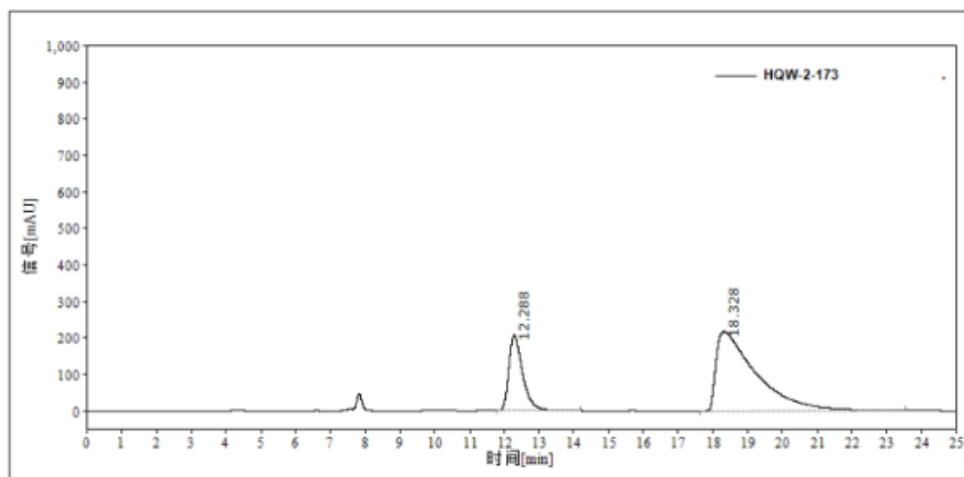

#### Integration Results

| # | Retention time [min] | Height [mAU] | Relative Height [%] | Area [mAU*min] | Relative Area [%] | Amount |
|---|----------------------|--------------|---------------------|----------------|-------------------|--------|
| 1 | 12.288               | 205.783      | 48.7                | 5688.346       | 24.7              | n.a.   |
| 2 | 18.328               | 217.087      | 51.3                | 17326.987      | 75.3              | n.a.   |

|        |  |         |     |           |       |  |
|--------|--|---------|-----|-----------|-------|--|
| Total: |  | 422.870 | 100 | 23015.333 | 100.0 |  |
|--------|--|---------|-----|-----------|-------|--|

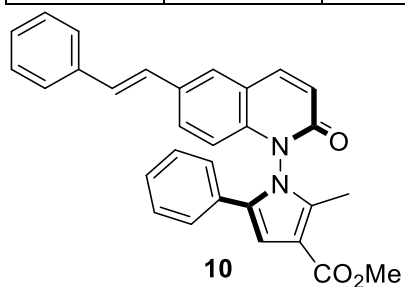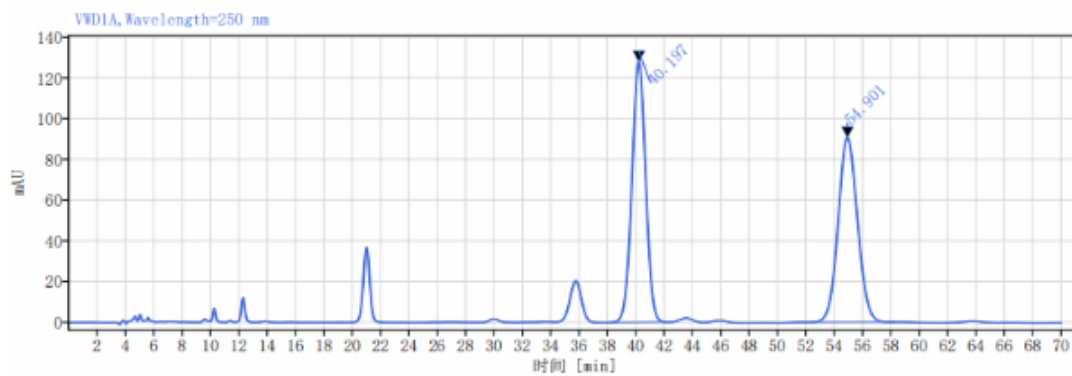

| Integration Results |                      |              |                |                   |        |
|---------------------|----------------------|--------------|----------------|-------------------|--------|
| #                   | Retention time [min] | Height [mAU] | Area [mAU*min] | Relative Area [%] | Amount |
| 1                   | 40.197               | 127.8267     | 8622.5235      | 50.0475           | n.a.   |
| 2                   | 54.901               | 90.5129      | 8606.1492      | 49.9525           | n.a.   |
| Total:              |                      |              | 17228.6727     | 100.0             |        |

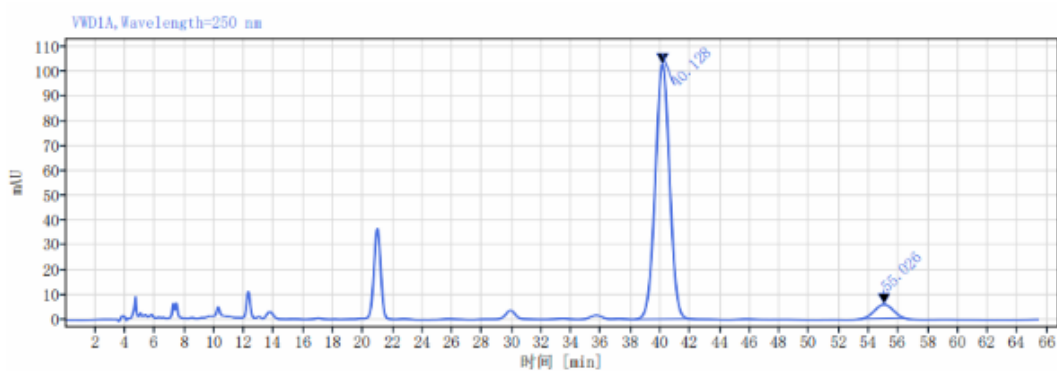

| Integration Results |                      |              |                |                   |        |
|---------------------|----------------------|--------------|----------------|-------------------|--------|
| #                   | Retention time [min] | Height [mAU] | Area [mAU*min] | Relative Area [%] | Amount |
| 1                   | 40.128               | 102.7744     | 6893.1299      | 93.4491           | n.a.   |
| 2                   | 55.026               | 5.6456       | 483.2165       | 6.5509            | n.a.   |
| Total:              |                      |              | 7376.3464      | 100.0             |        |

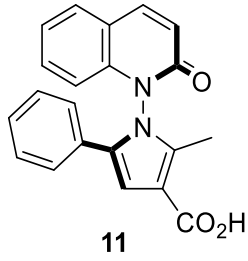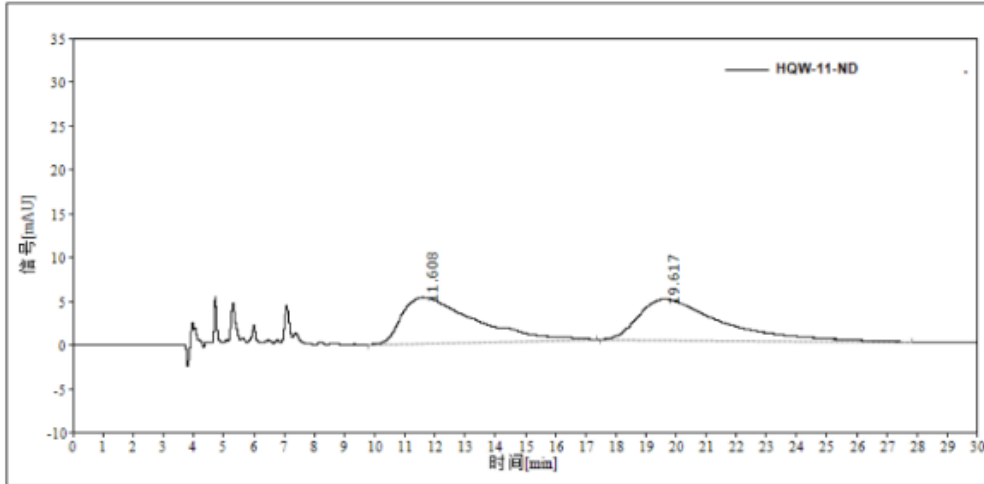

| Integration Results |                      |              |                     |                |                   |        |
|---------------------|----------------------|--------------|---------------------|----------------|-------------------|--------|
| #                   | Retention time [min] | Height [mAU] | Relative Height [%] | Area [mAU*min] | Relative Area [%] | Amount |
| 1                   | 11.608               | 5.282        | 53.1                | 885.818        | 49.9              | n.a.   |
| 2                   | 19.617               | 4.663        | 46.9                | 889.026        | 50.1              | n.a.   |
| Total:              |                      | 9.945        | 100                 | 1774.844       | 100.0             |        |

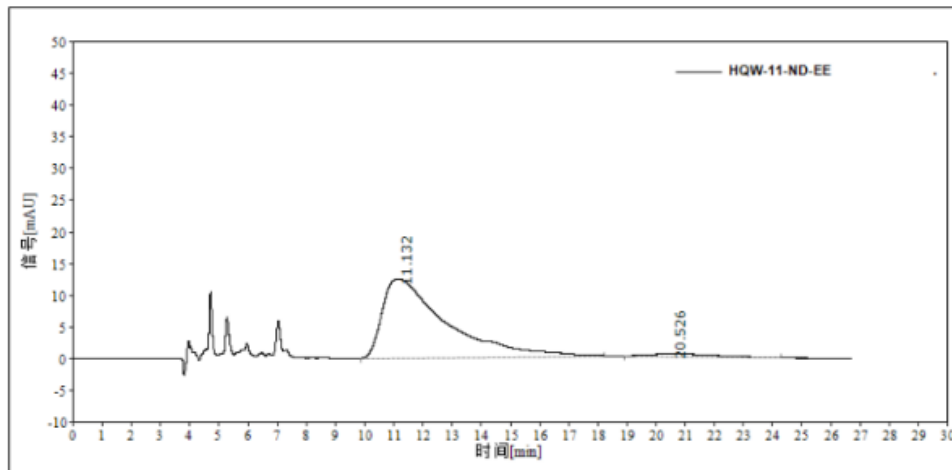

| Integration Results |                      |              |                     |                |                   |        |
|---------------------|----------------------|--------------|---------------------|----------------|-------------------|--------|
| #                   | Retention time [min] | Height [mAU] | Relative Height [%] | Area [mAU*min] | Relative Area [%] | Amount |
| 1                   | 11.132               | 12.563       | 96.8                | 1890.065       | 96.6              | n.a.   |
| 2                   | 20.526               | 0.420        | 3.2                 | 66.975         | 3.4               | n.a.   |
| Total:              |                      | 12.983       | 100                 | 1957.040       | 100.0             |        |

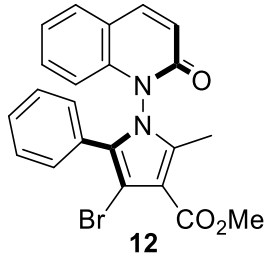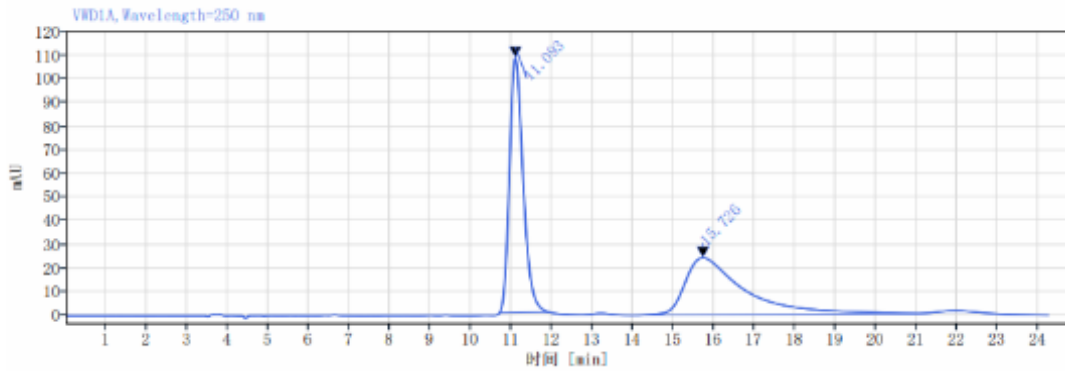

| Integration Results |                      |              |                |                   |             |
|---------------------|----------------------|--------------|----------------|-------------------|-------------|
| #                   | Retention time [min] | Height [mAU] | Area [mAU*min] | Relative Area [%] | Amount n.a. |
| 1                   | 11.093               | 107.7274     | 2519.0494      | 50.8850           | n.a.        |
| 2                   | 15.726               | 24.0910      | 2431.4216      | 49.1150           | n.a.        |
| Total:              |                      |              | 4950.4710      | 100.0             |             |

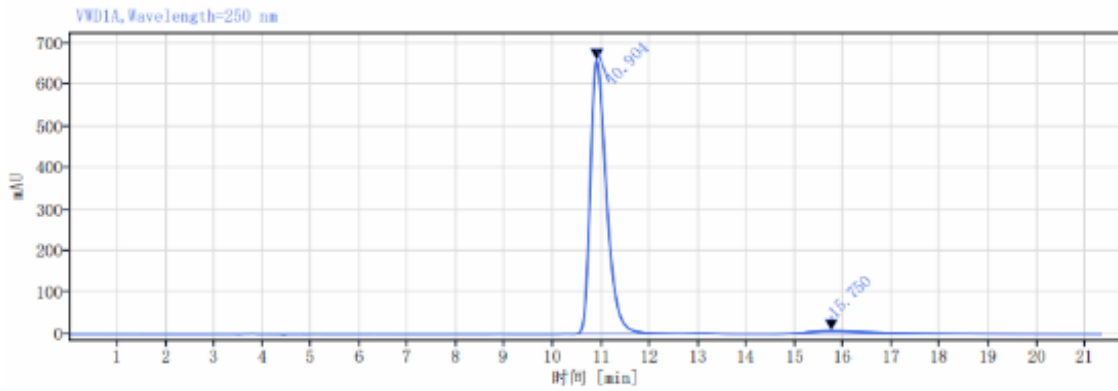

| Integration Results |                      |              |                |                   |             |
|---------------------|----------------------|--------------|----------------|-------------------|-------------|
| #                   | Retention time [min] | Height [mAU] | Area [mAU*min] | Relative Area [%] | Amount n.a. |
| 1                   | 10.904               | 659.6101     | 15269.6064     | 95.1464           | n.a.        |
| 2                   | 15.750               | 7.5790       | 778.9350       | 4.8536            | n.a.        |
| Total:              |                      |              | 16048.5414     | 100.0             |             |

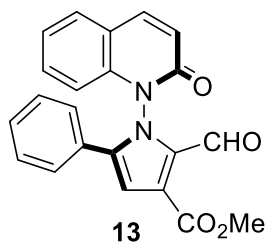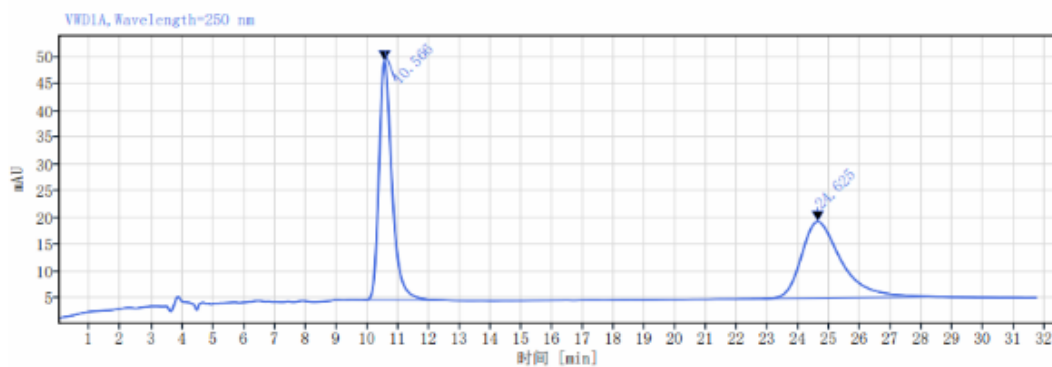

| Integration Results |                      |              |                |                   |        |
|---------------------|----------------------|--------------|----------------|-------------------|--------|
| #                   | Retention time [min] | Height [mAU] | Area [mAU*min] | Relative Area [%] | Amount |
| 1                   | 10.566               | 44.6343      | 1306.8471      | 50.3773           | n.a.   |
| 2                   | 24.625               | 14.2569      | 1287.2721      | 49.6227           | n.a.   |
| Total:              |                      |              | 2594.1192      | 100.0             |        |

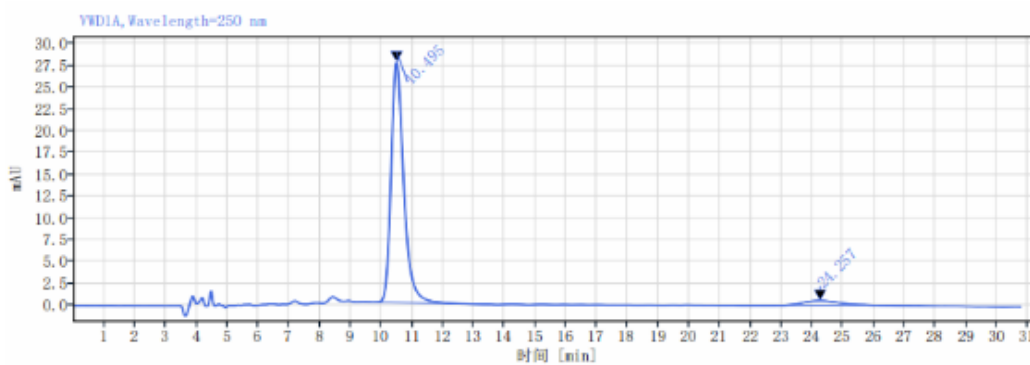

| Integration Results |                      |              |                |                   |        |
|---------------------|----------------------|--------------|----------------|-------------------|--------|
| #                   | Retention time [min] | Height [mAU] | Area [mAU*min] | Relative Area [%] | Amount |
| 1                   | 10.495               | 27.5807      | 788.3400       | 94.7843           | n.a.   |
| 2                   | 24.257               | 0.5401       | 43.3803        | 5.2157            | n.a.   |
| Total:              |                      |              | 831.7203       | 100.0             |        |



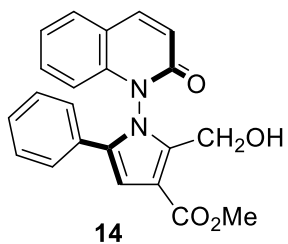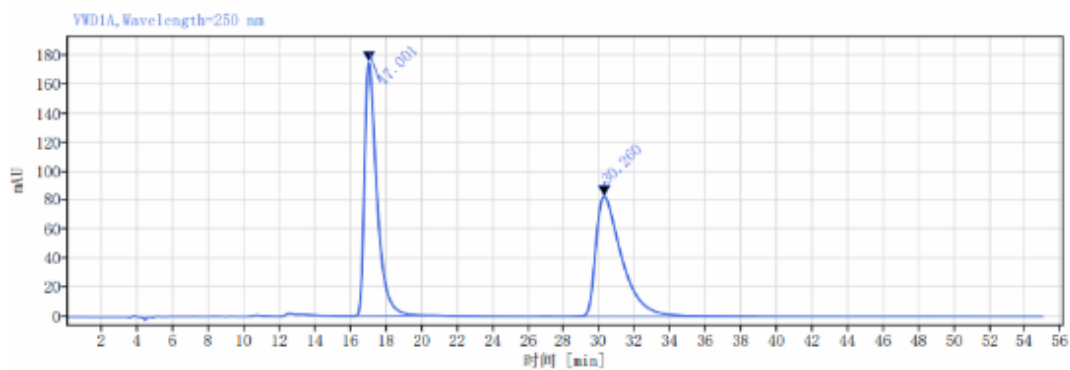

| Integration Results |                      |              |                |                   |        |
|---------------------|----------------------|--------------|----------------|-------------------|--------|
| #                   | Retention time [min] | Height [mAU] | Area [mAU*min] | Relative Area [%] | Amount |
| 1                   | 17.001               | 174.7254     | 8468.1850      | 50.2082           | n.a.   |
| 2                   | 30.260               | 82.5886      | 8397.9678      | 49.7918           | n.a.   |
| Total:              |                      |              | 16866.1528     | 100.0             |        |

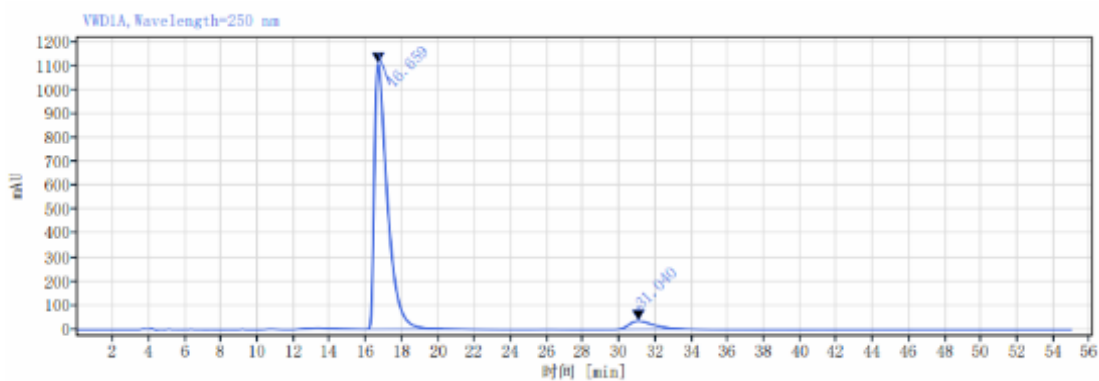

| Integration Results |                      |              |                |                   |        |
|---------------------|----------------------|--------------|----------------|-------------------|--------|
| #                   | Retention time [min] | Height [mAU] | Area [mAU*min] | Relative Area [%] | Amount |
| 1                   | 16.659               | 1107.6922    | 55331.3581     | 94.4839           | n.a.   |
| 2                   | 31.040               | 33.9138      | 3230.3397      | 5.5161            | n.a.   |
| Total:              |                      |              | 58561.6977     | 100               |        |

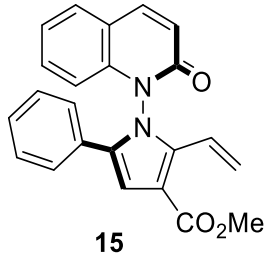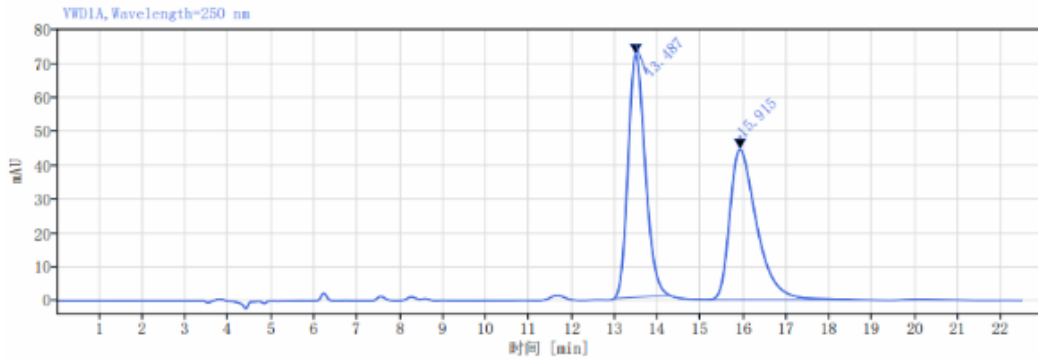

| Integration Results |                      |              |                |                   |        |
|---------------------|----------------------|--------------|----------------|-------------------|--------|
| #                   | Retention time [min] | Height [mAU] | Area [mAU*min] | Relative Area [%] | Amount |
| 1                   | 13.487               | 71.6997      | 1992.2736      | 50.6756           | n.a.   |
| 2                   | 15.915               | 44.3822      | 1939.1521      | 49.3244           | n.a.   |
| Total:              |                      |              | 3931.4258      | 100               |        |

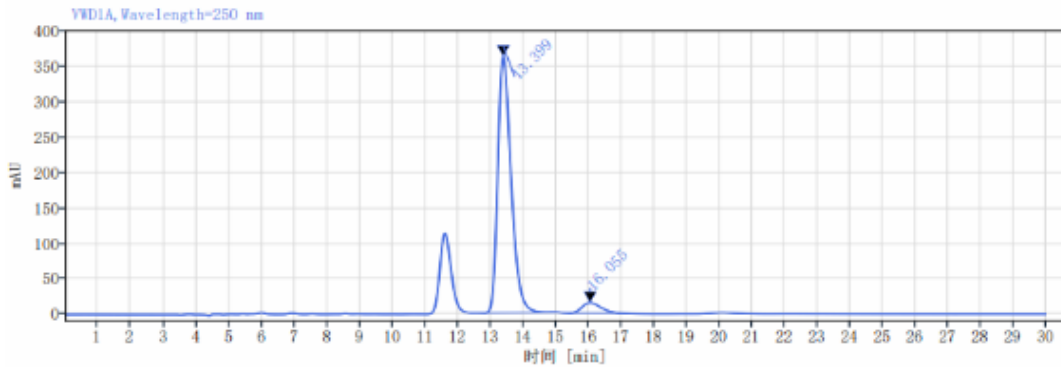

| Integration Results |                      |              |                |                   |        |
|---------------------|----------------------|--------------|----------------|-------------------|--------|
| #                   | Retention time [min] | Height [mAU] | Area [mAU*min] | Relative Area [%] | Amount |
| 1                   | 13.399               | 362.5703     | 10319.7334     | 94.6072           | n.a.   |
| 2                   | 16.055               | 14.6888      | 588.2424       | 5.3928            | n.a.   |
| Total:              |                      |              | 10907.9758     | 100               |        |

# (10) Copies of $^1\text{H}$ , $^{13}\text{C}$ and $^{19}\text{F}$ NMR Spectra

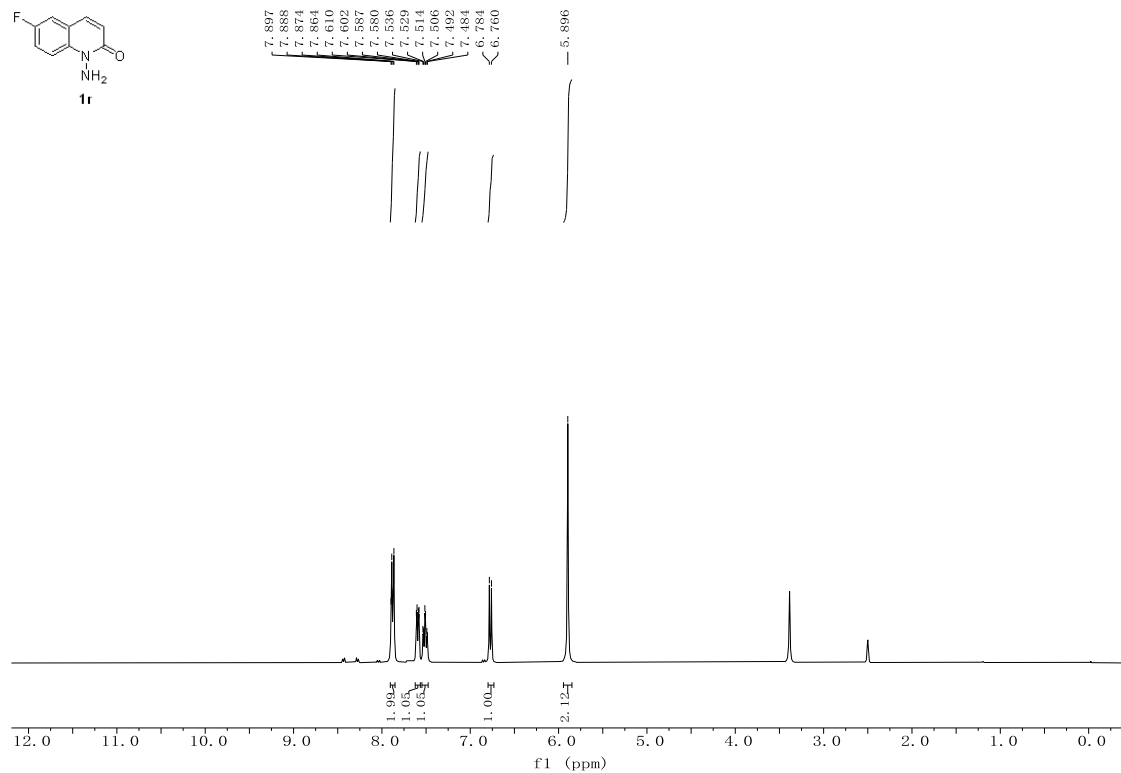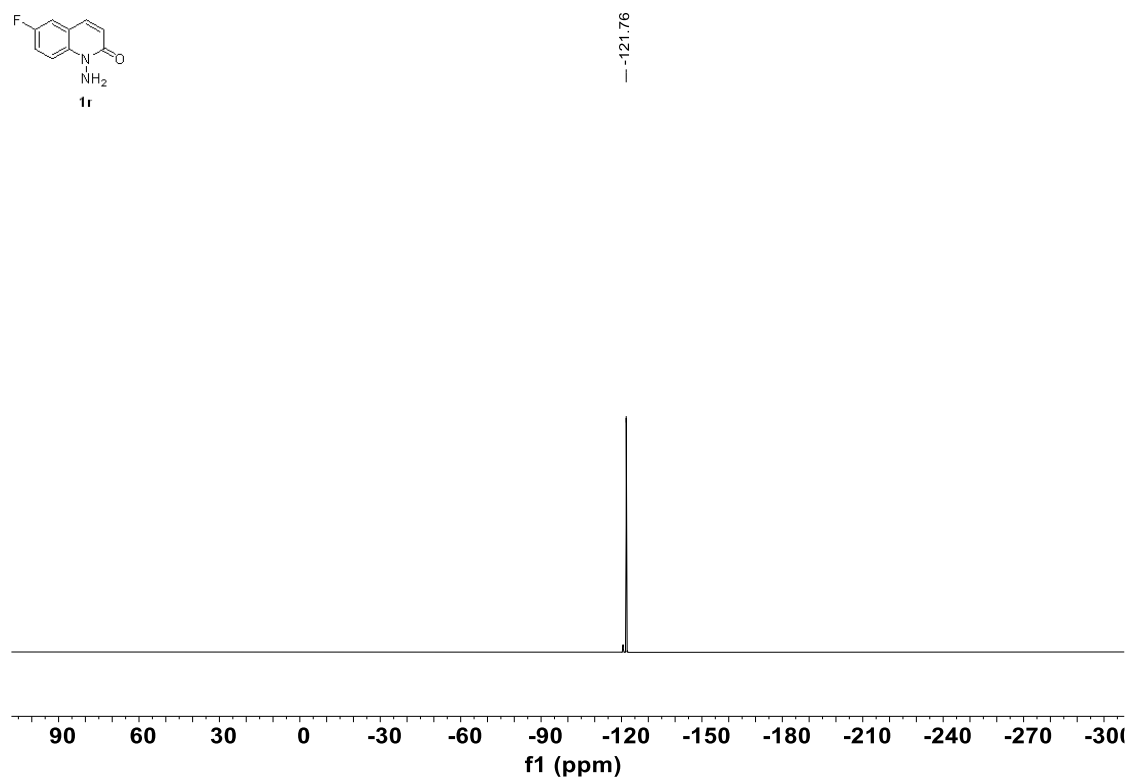

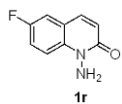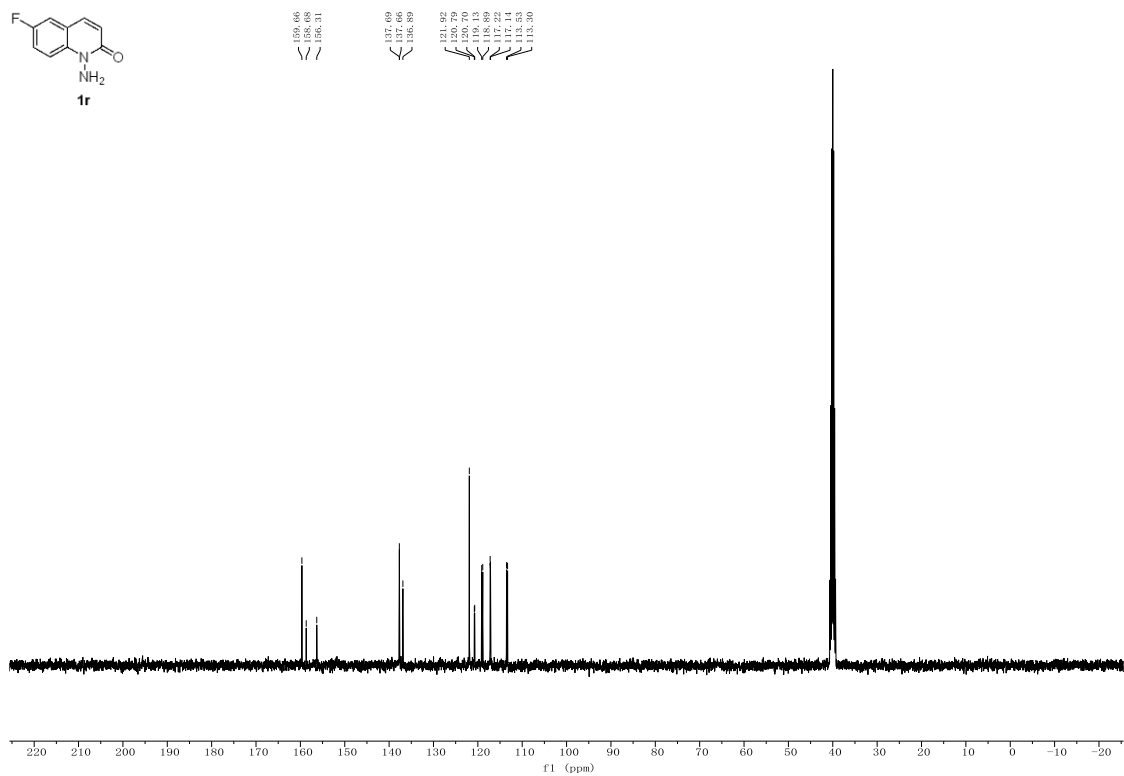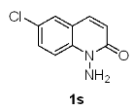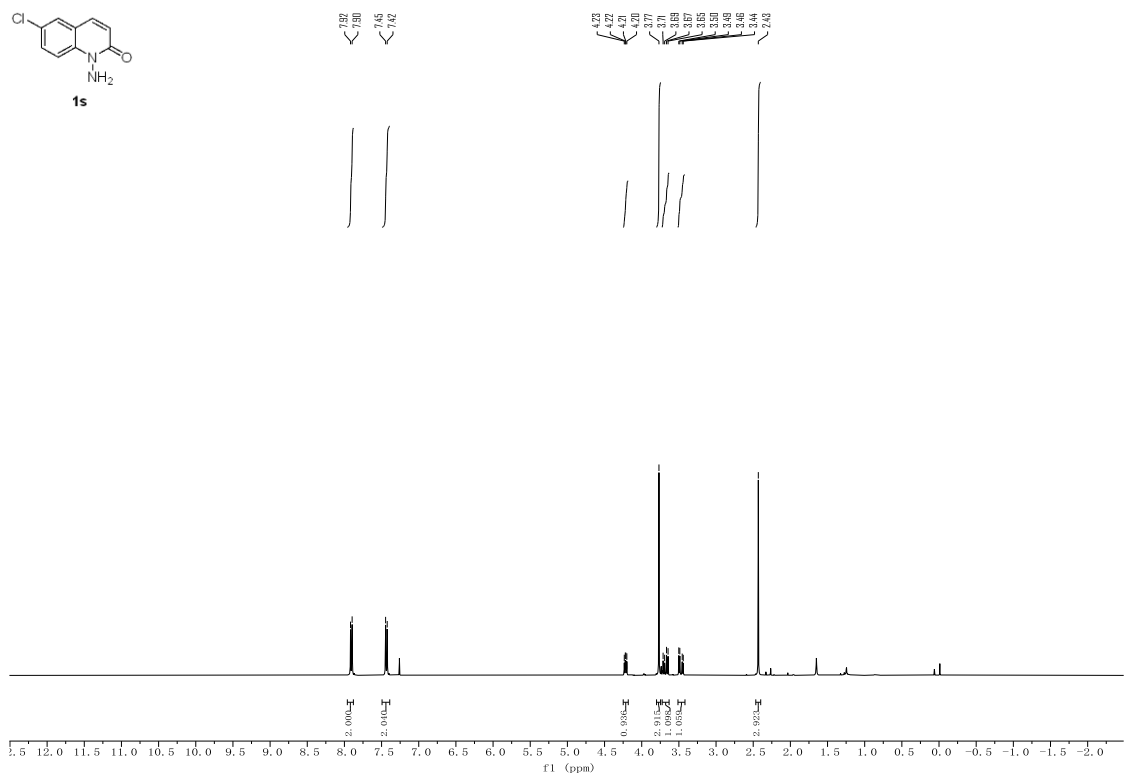





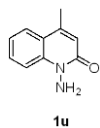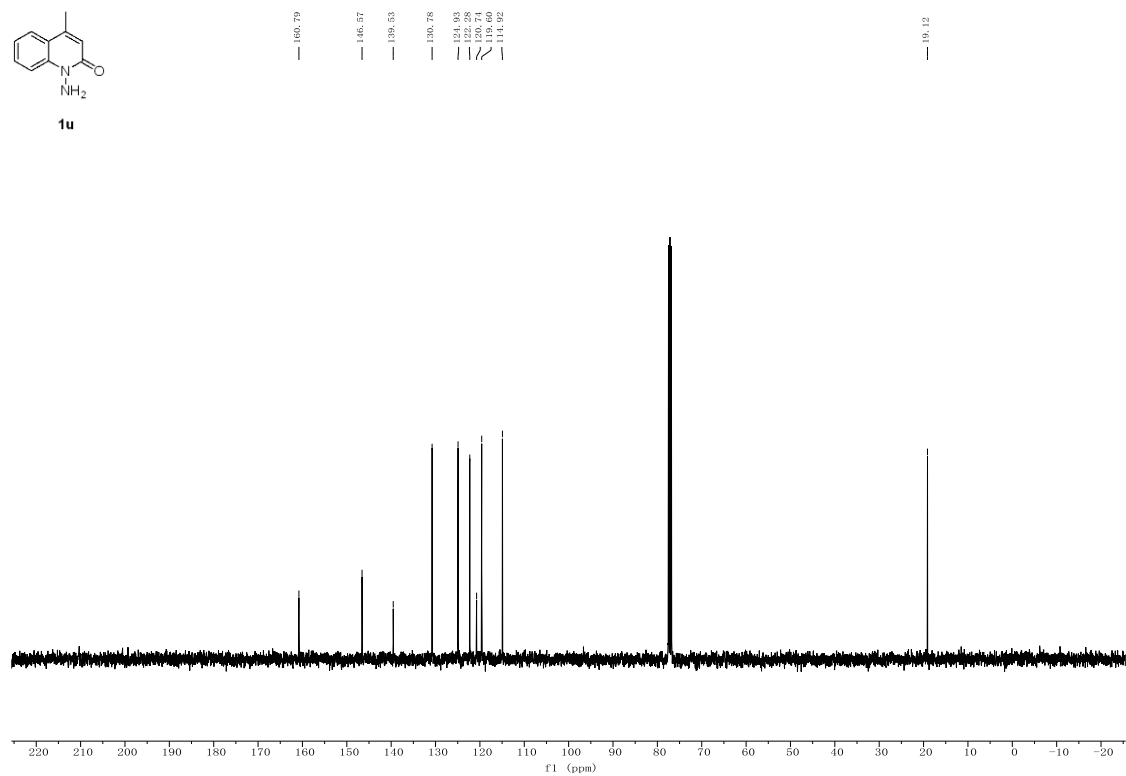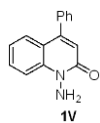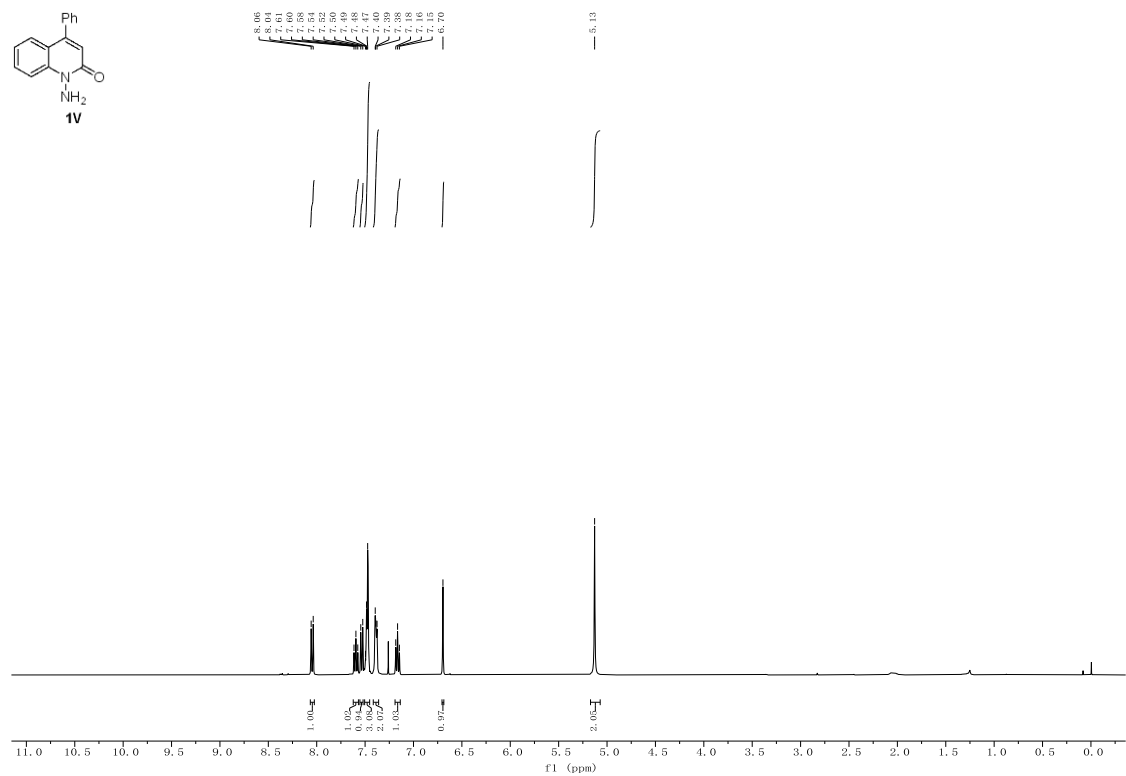

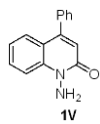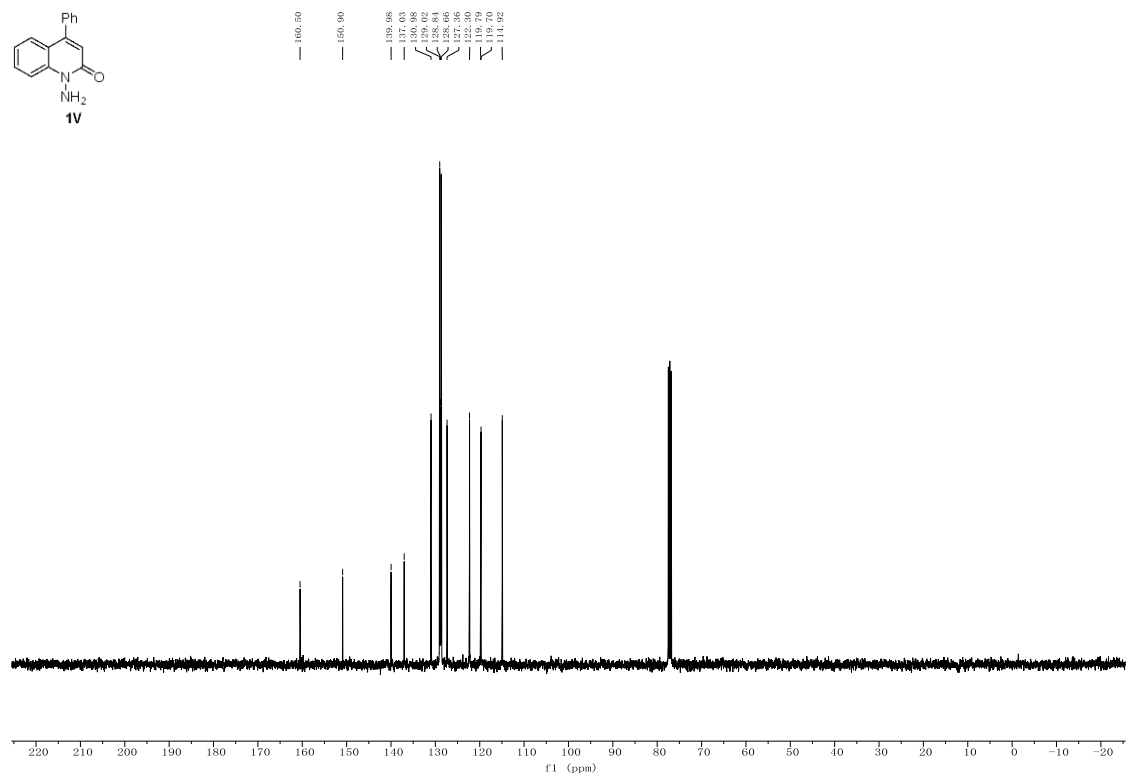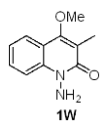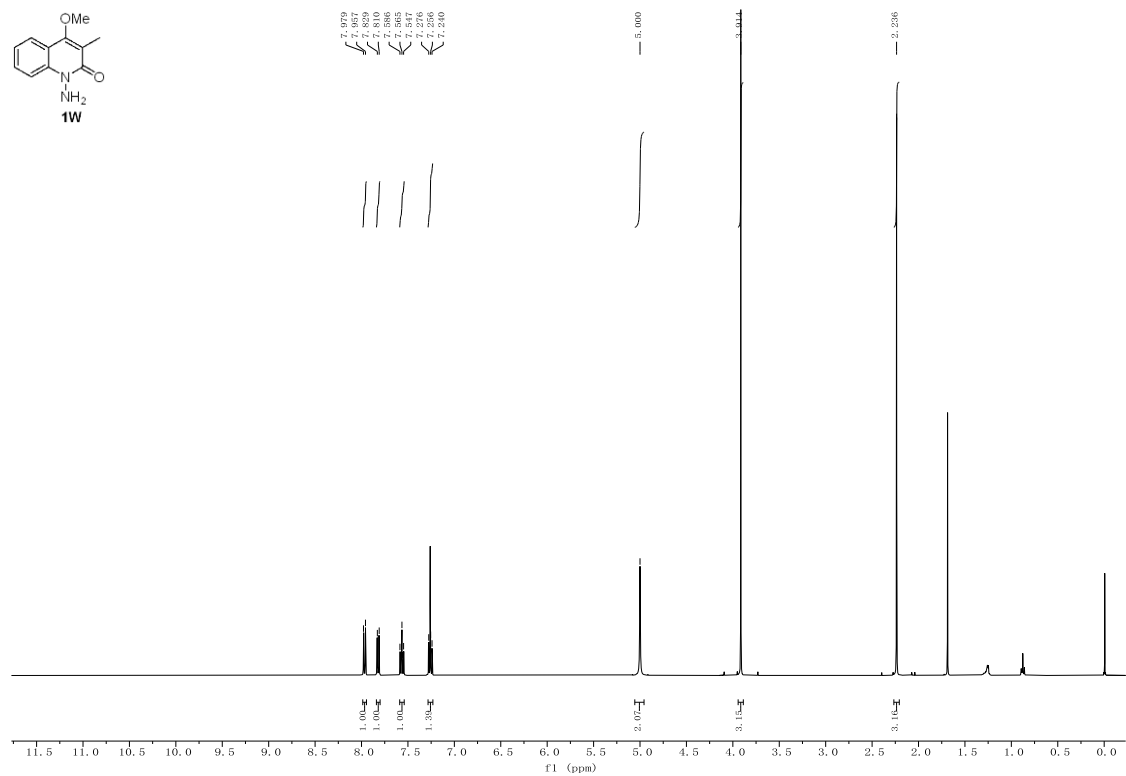



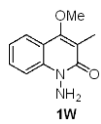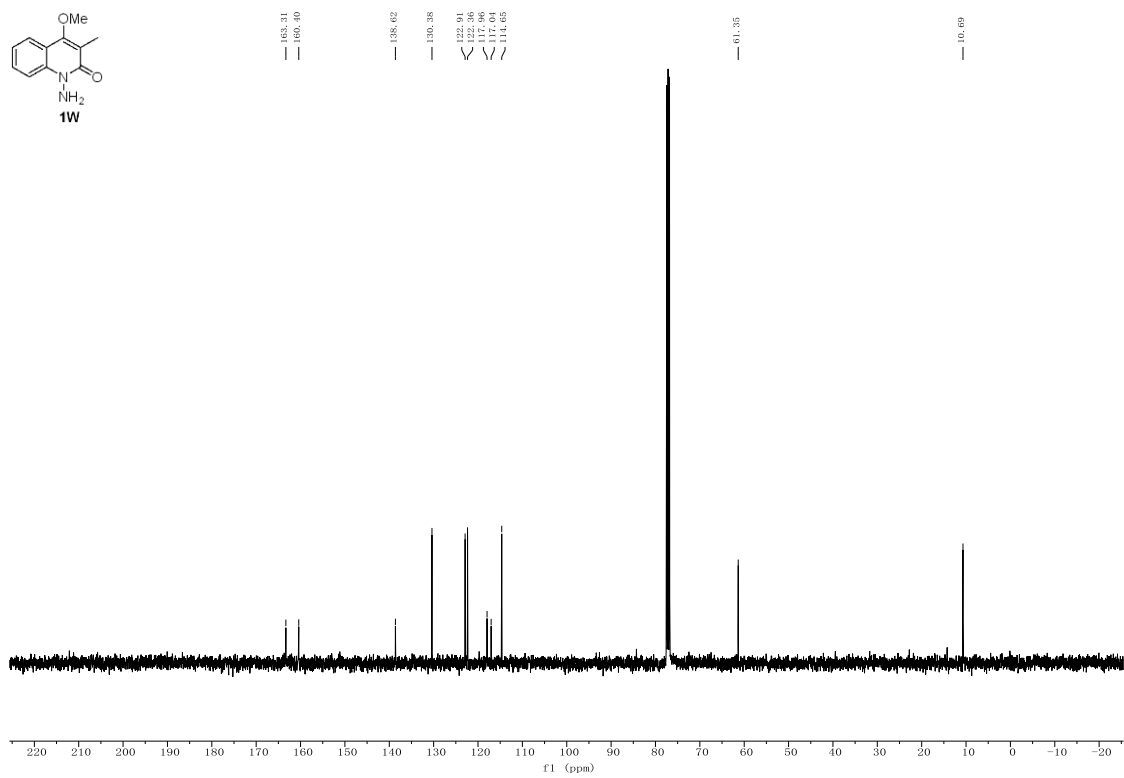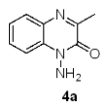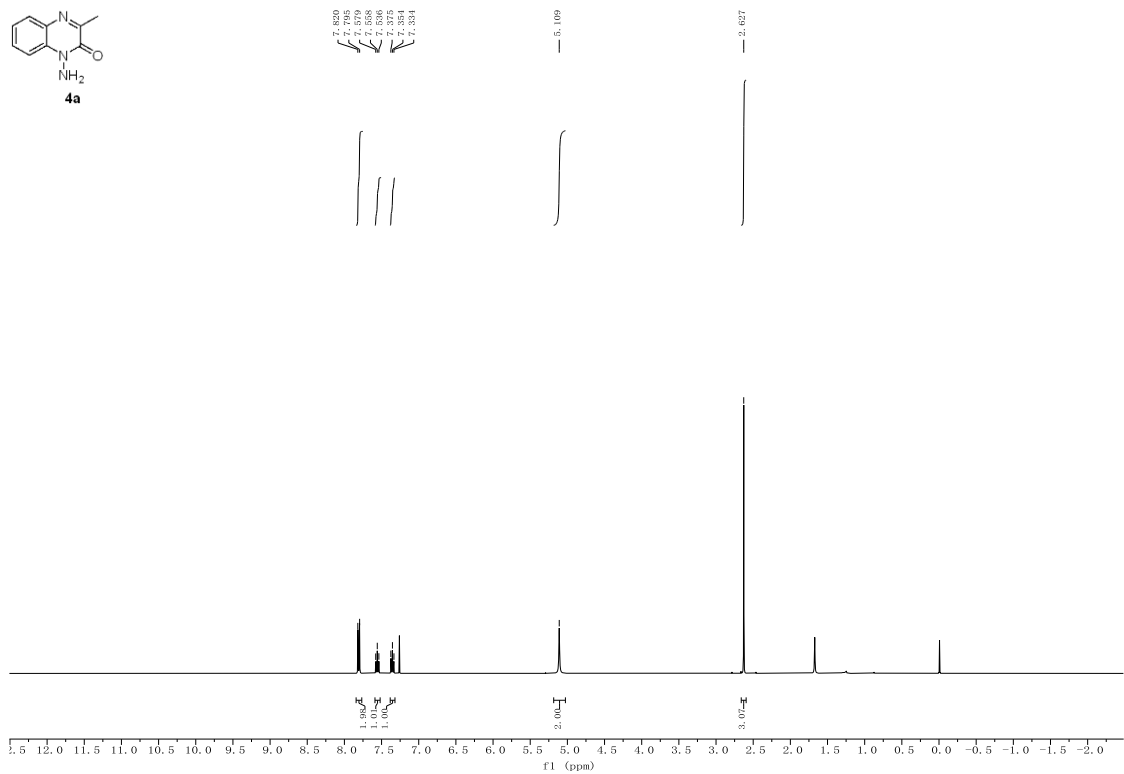

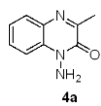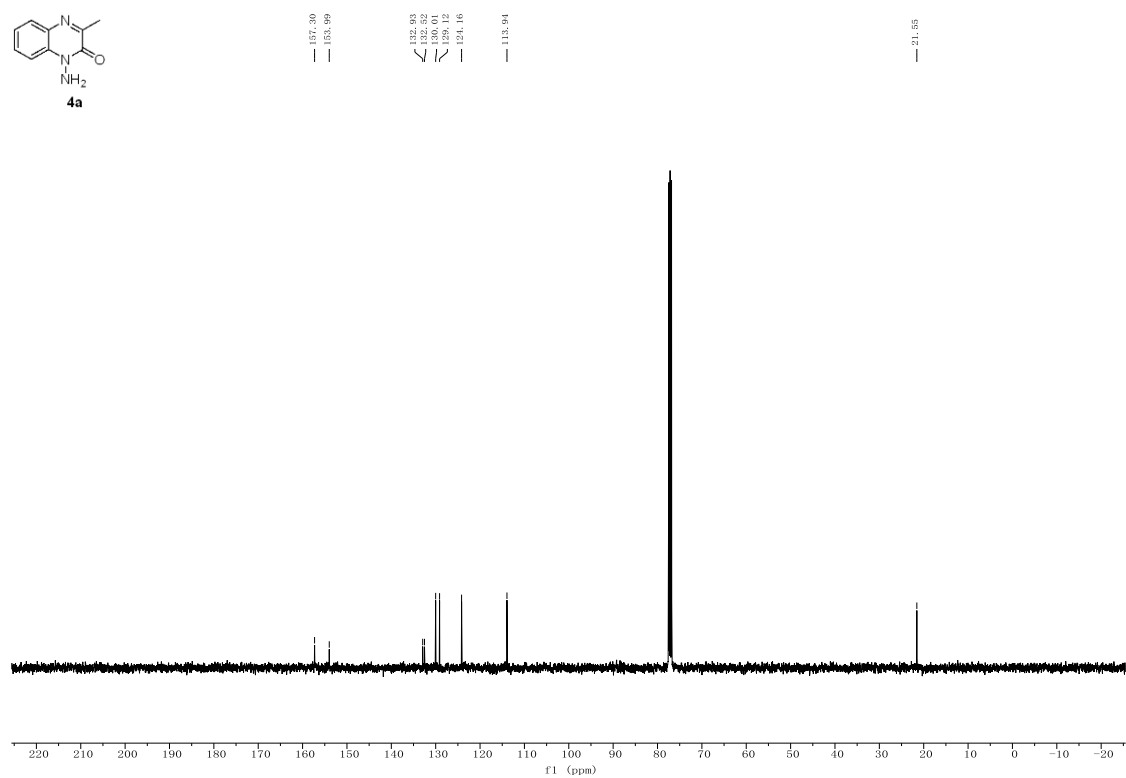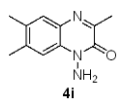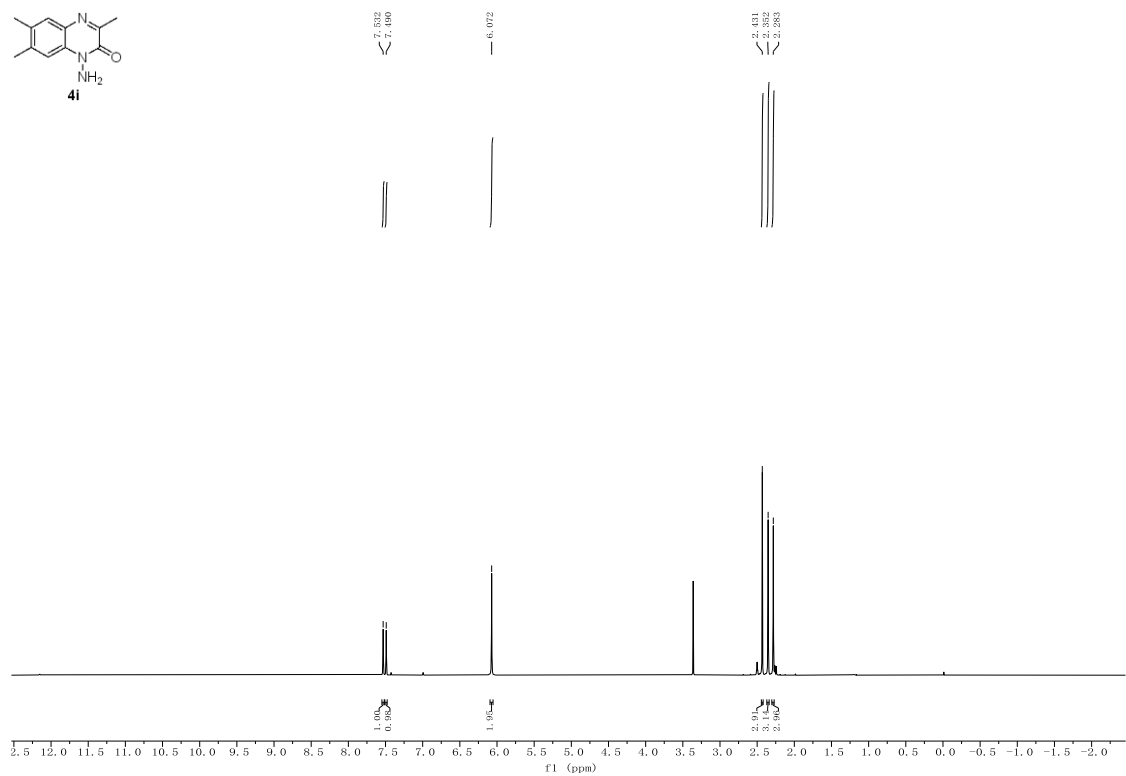

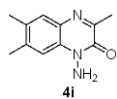

155.15  
152.45  
138.95  
131.96  
130.59  
128.20  
111.40

21.11  
20.00  
18.87

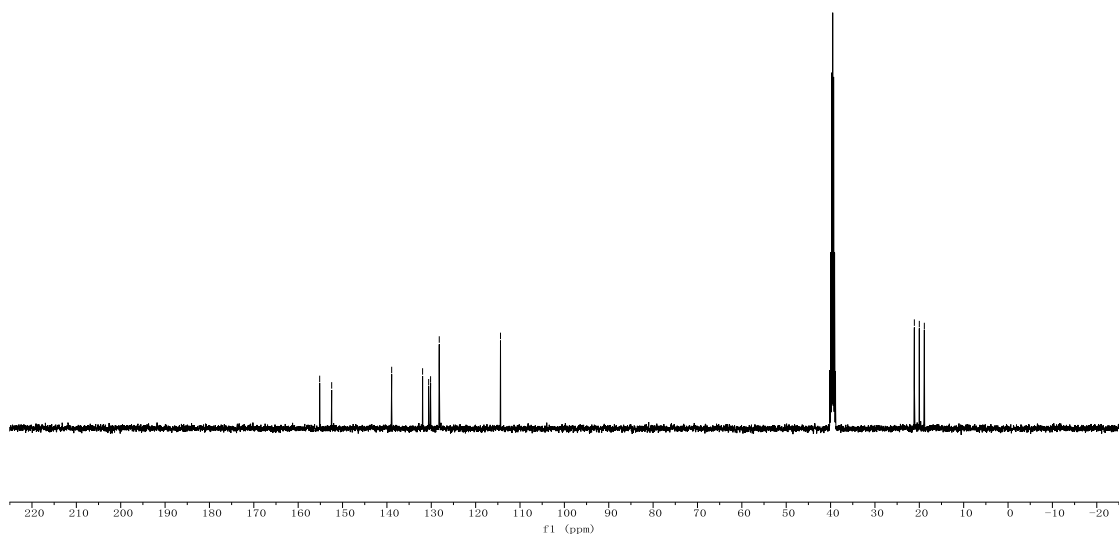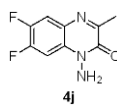

7.84  
7.82  
7.81  
7.73  
7.71  
7.68

6.06

2.44

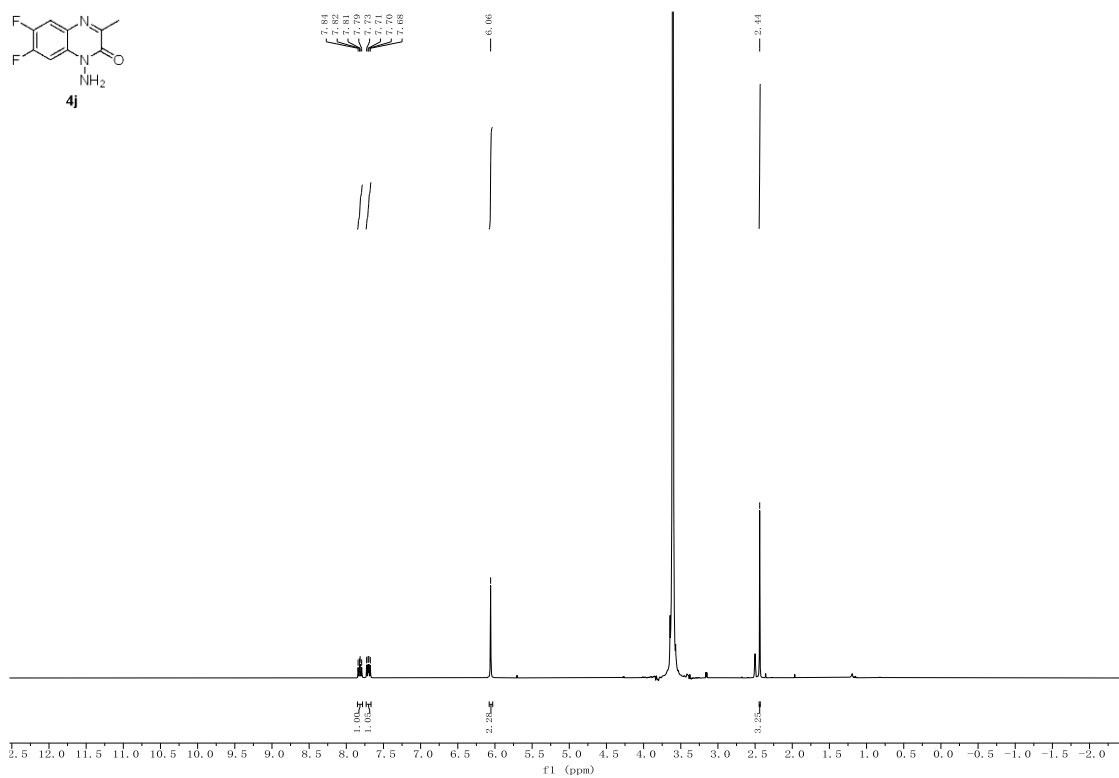

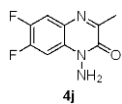

133.75  
143.77

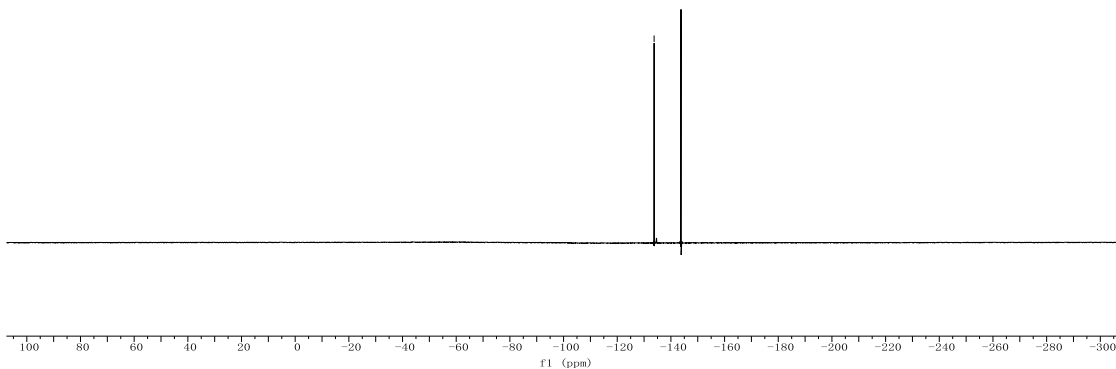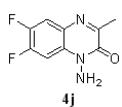

158.25  
153.01  
151.64  
151.52  
149.16  
149.00  
147.30  
147.15  
144.84  
144.70  
140.93  
130.83  
128.29  
128.21  
116.32  
116.14  
103.16  
102.93

21.37

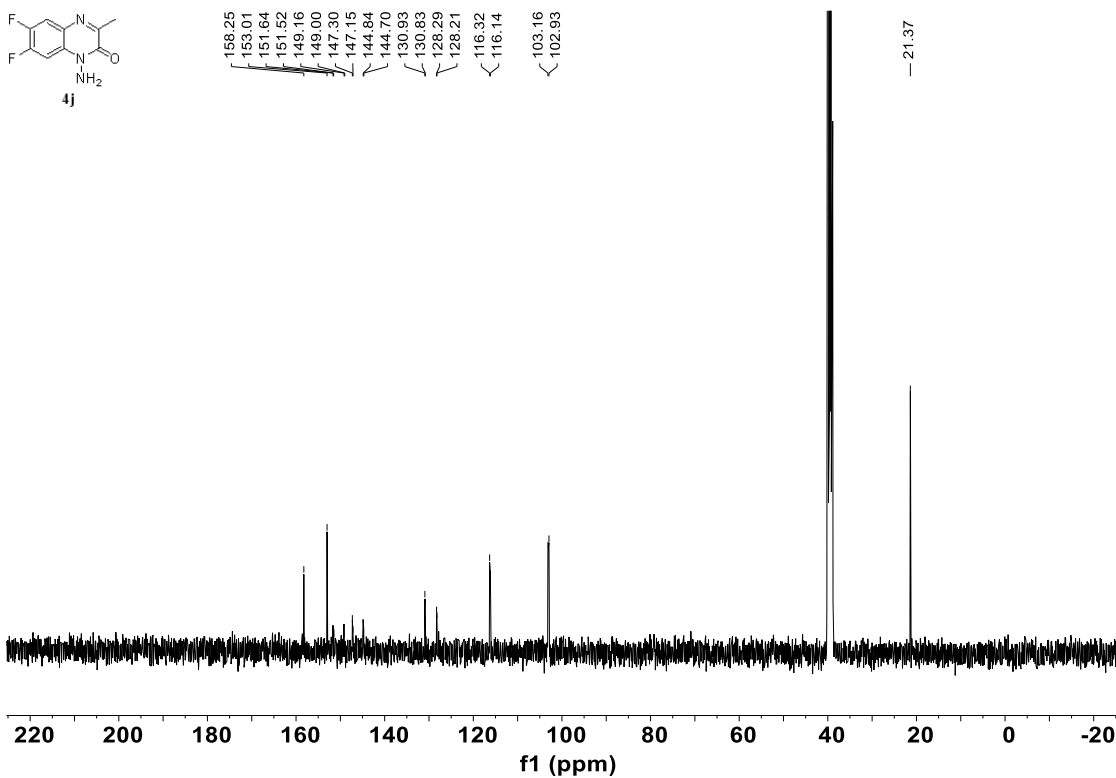

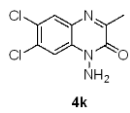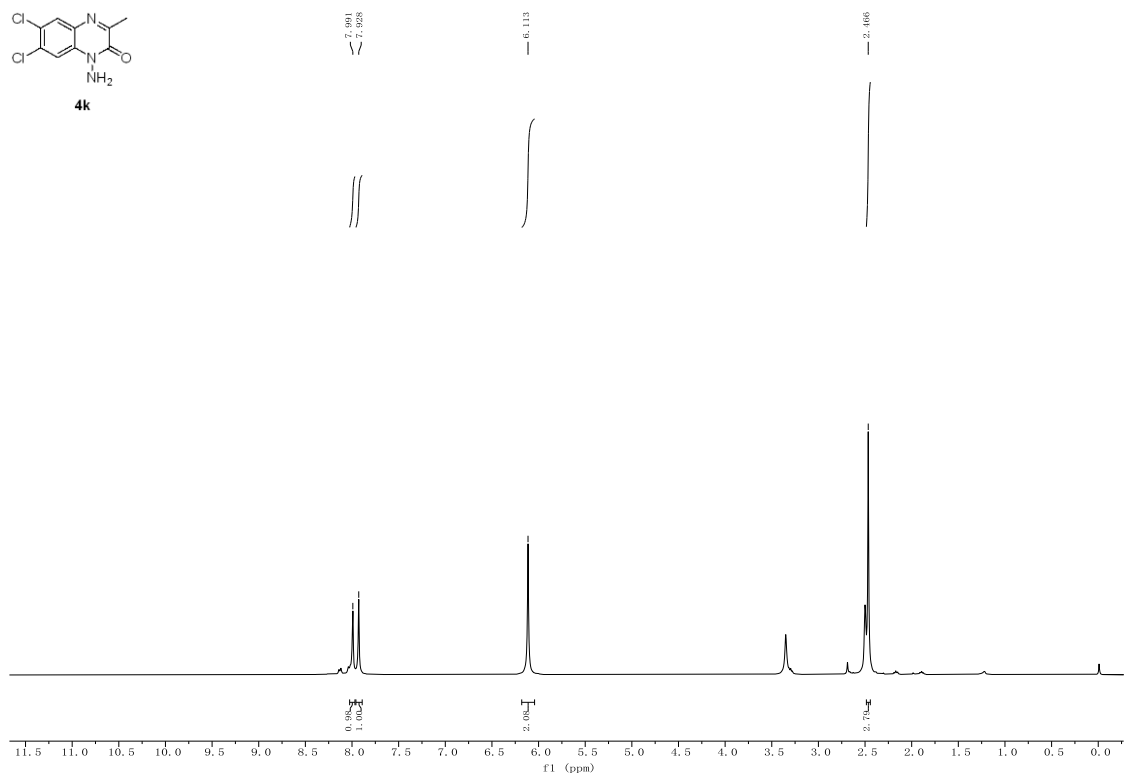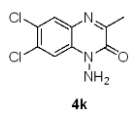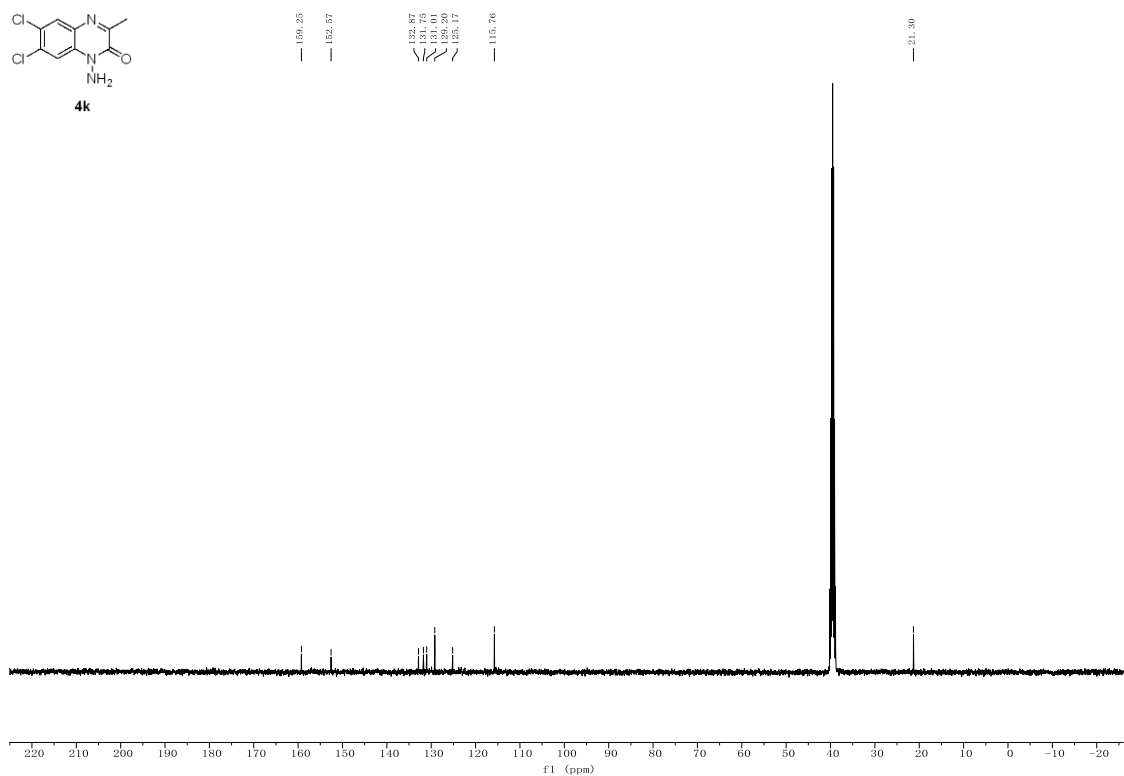

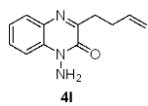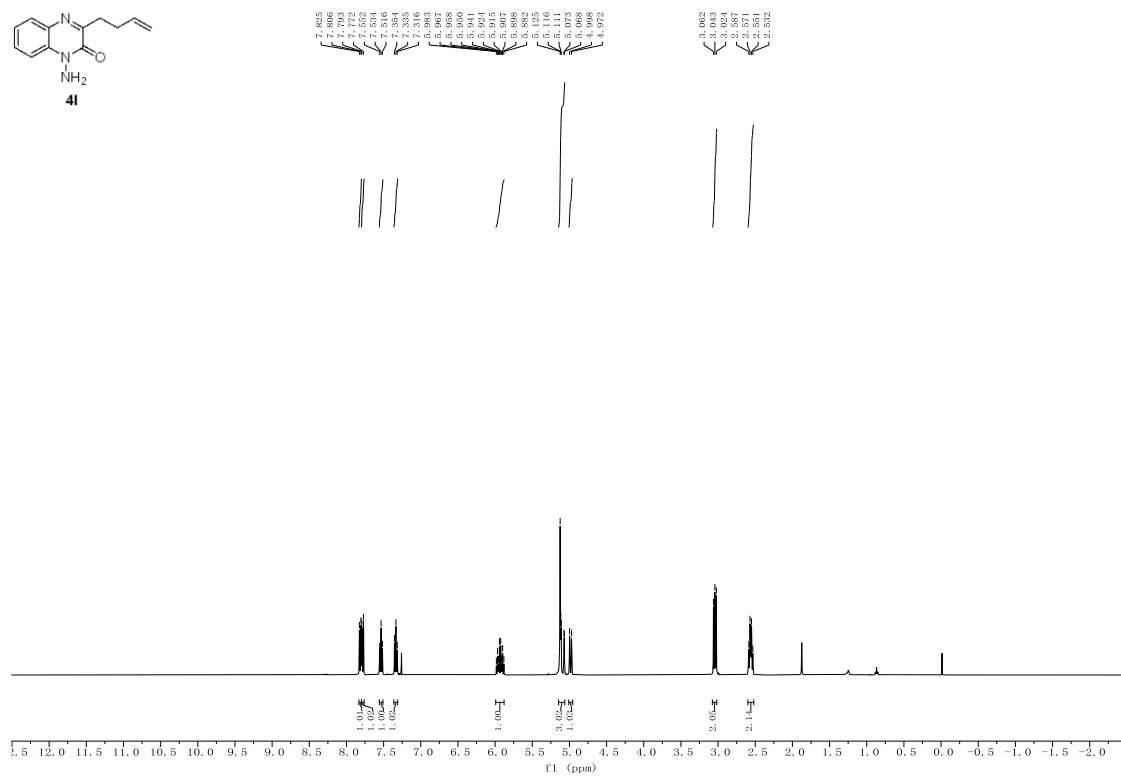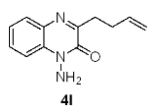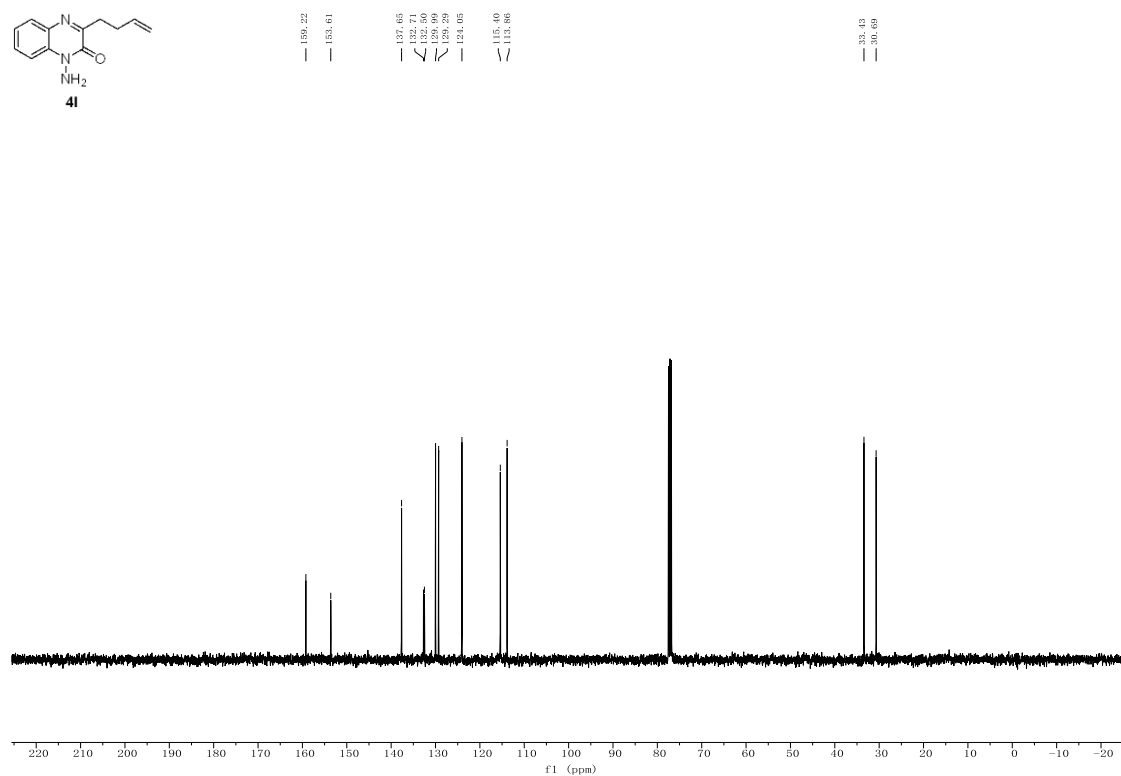

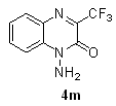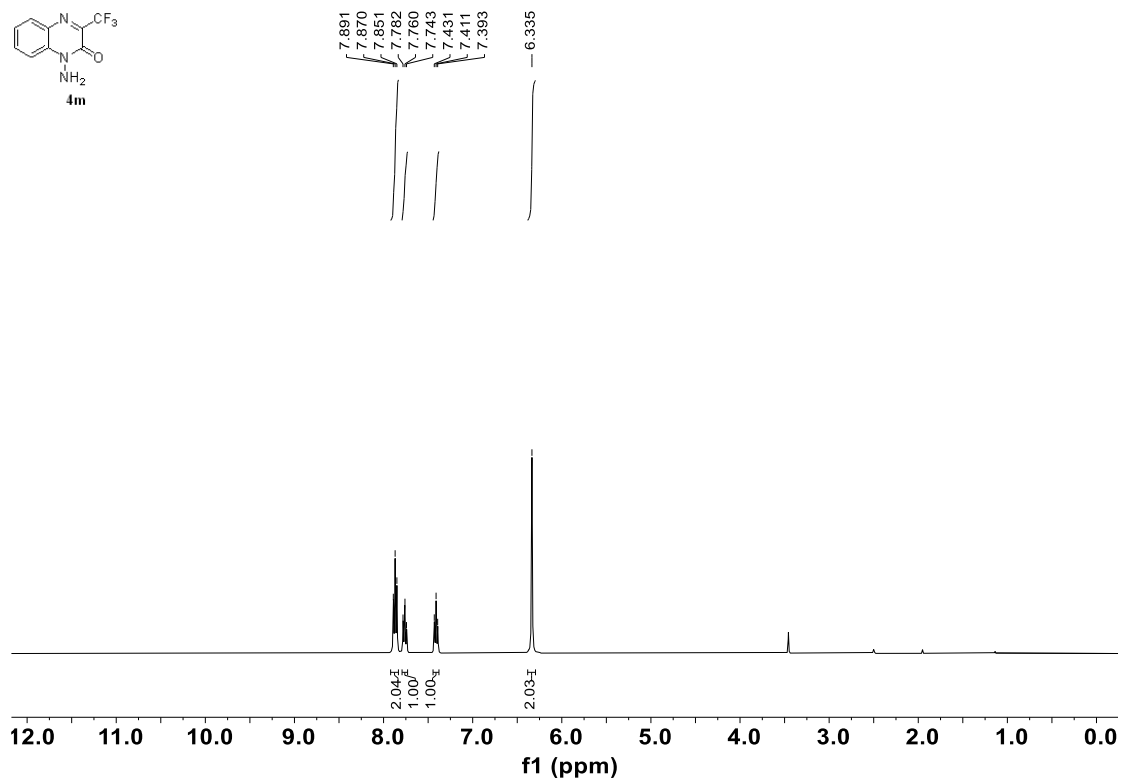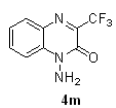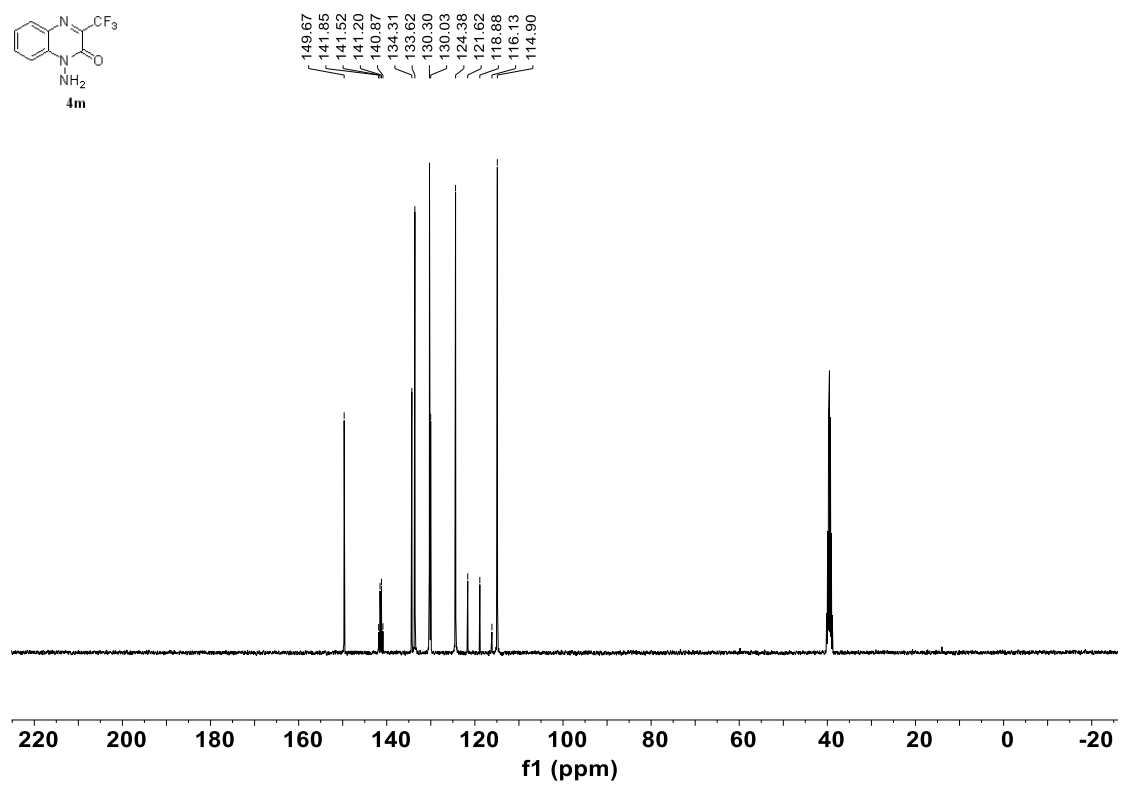

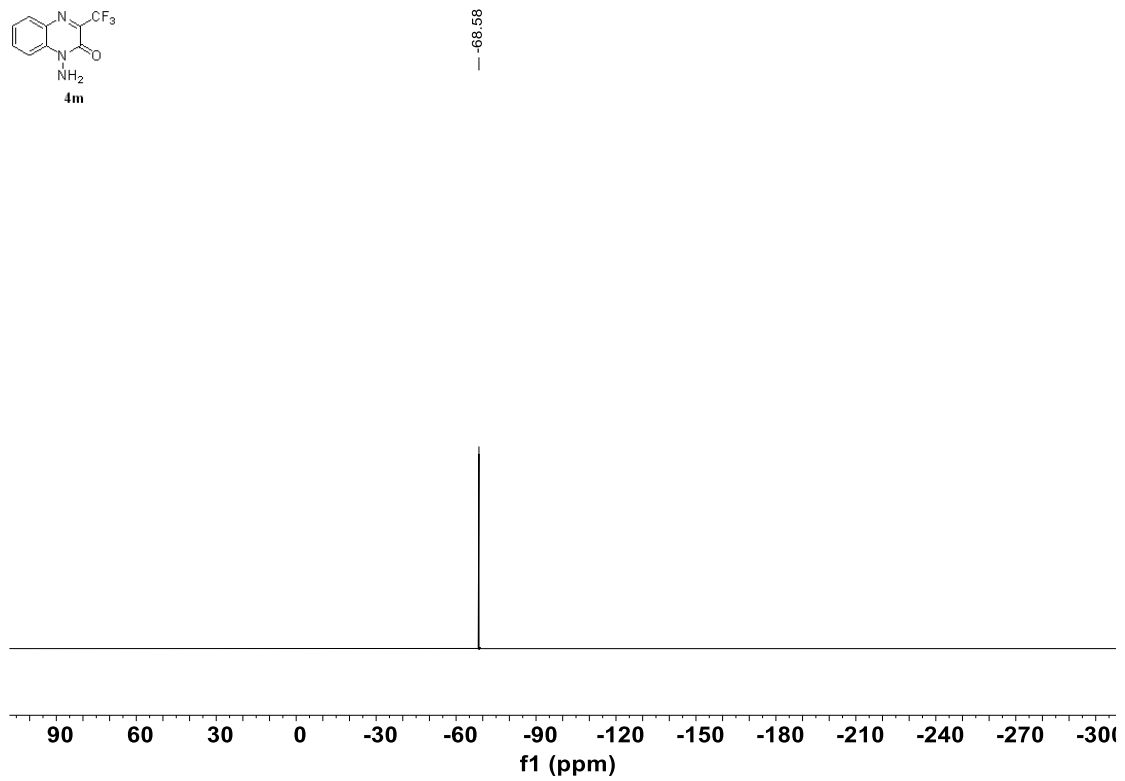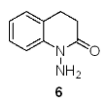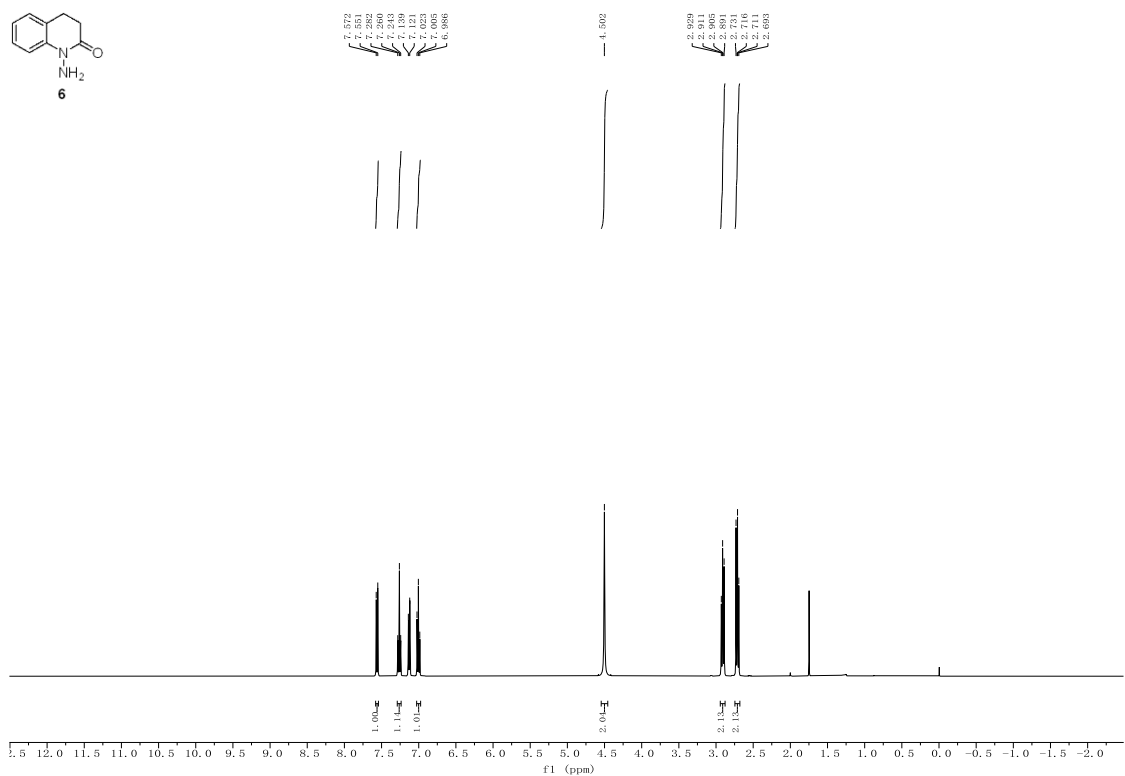



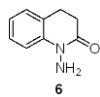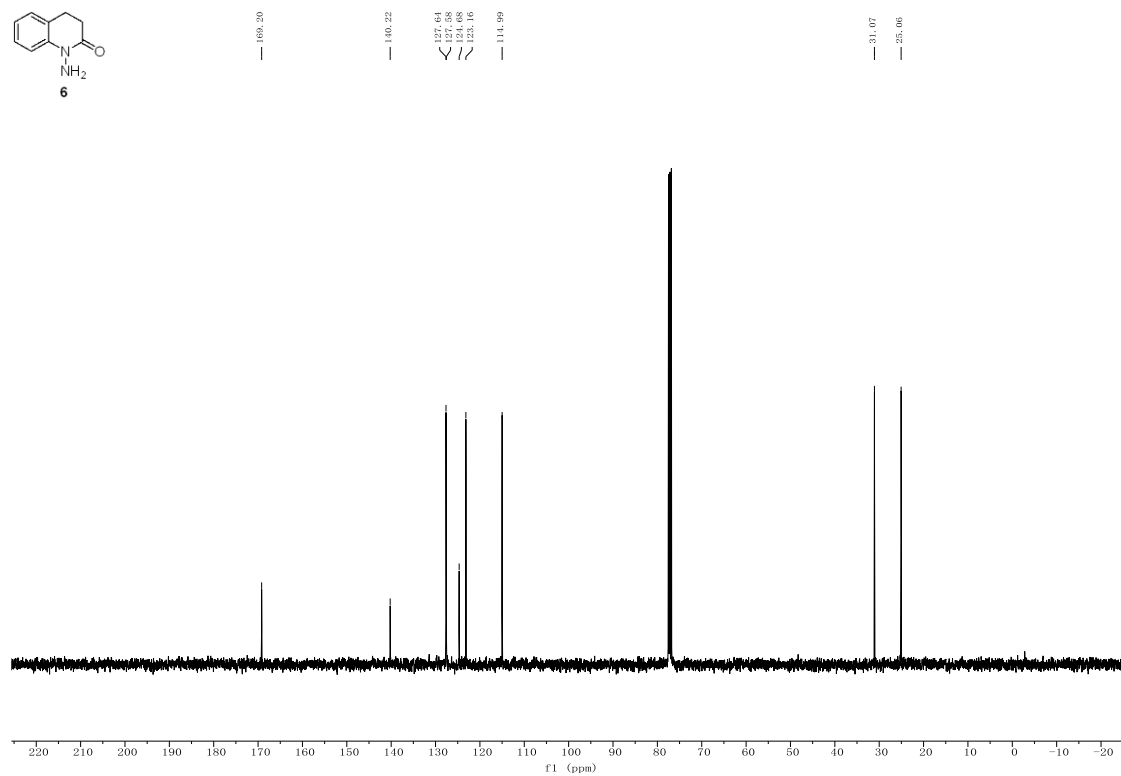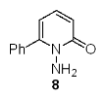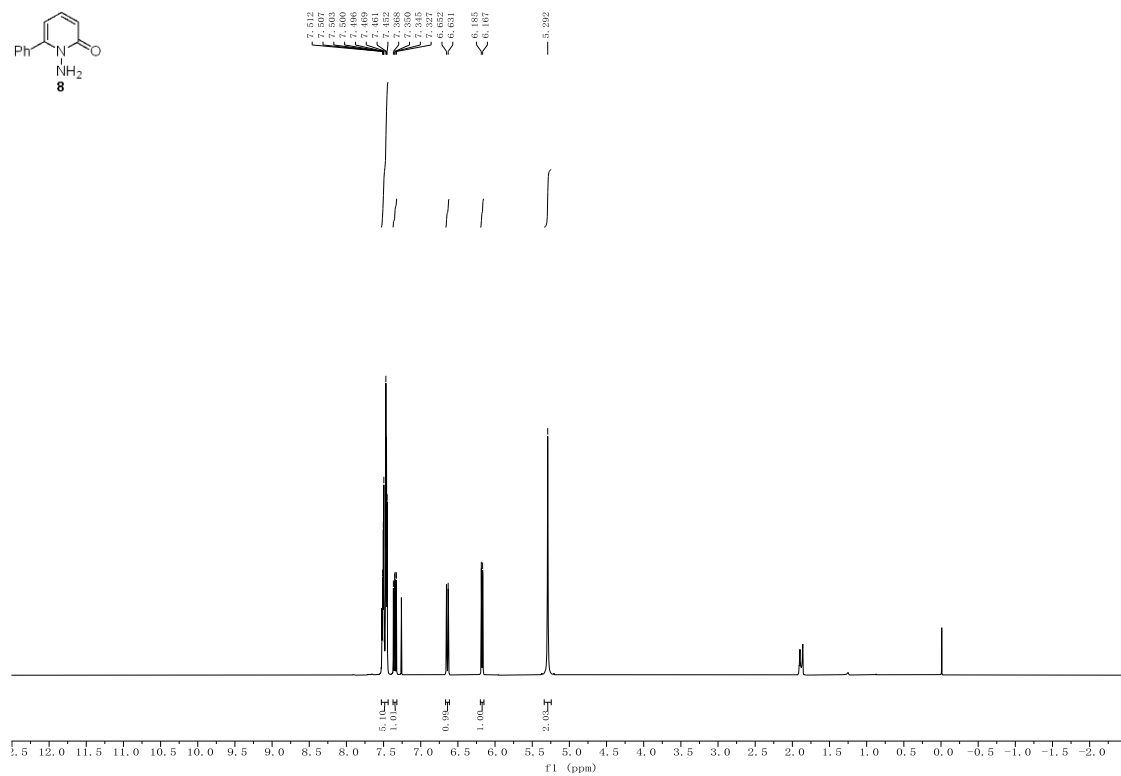

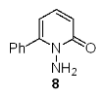

161.65  
148.04  
137.83  
136.79  
129.40  
128.02  
126.52  
117.18  
107.55

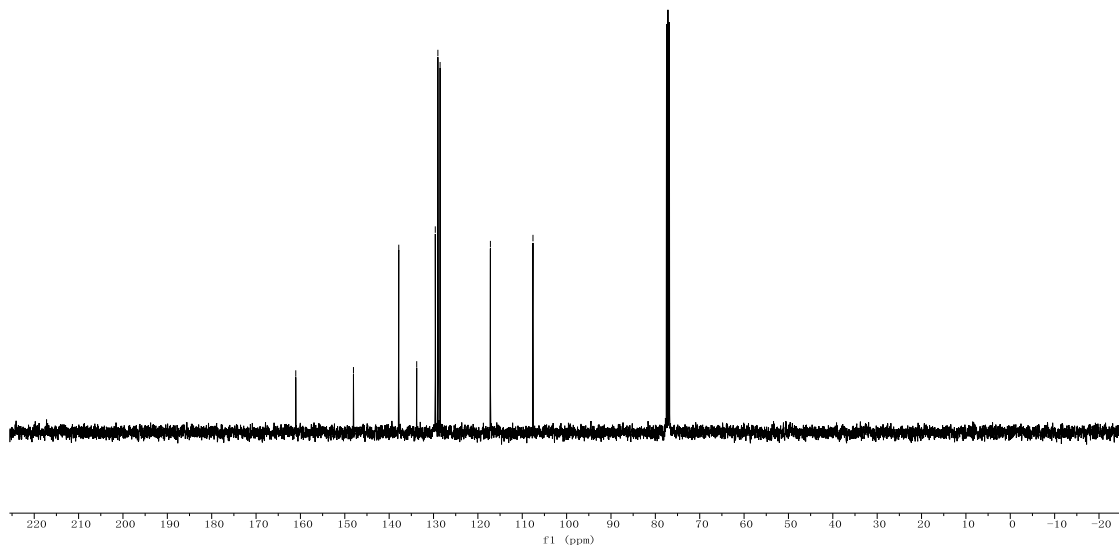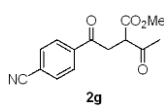

8.051  
8.030  
7.777  
7.747  
4.231  
4.211  
4.197  
3.757  
3.503  
3.457  
3.443  
2.415

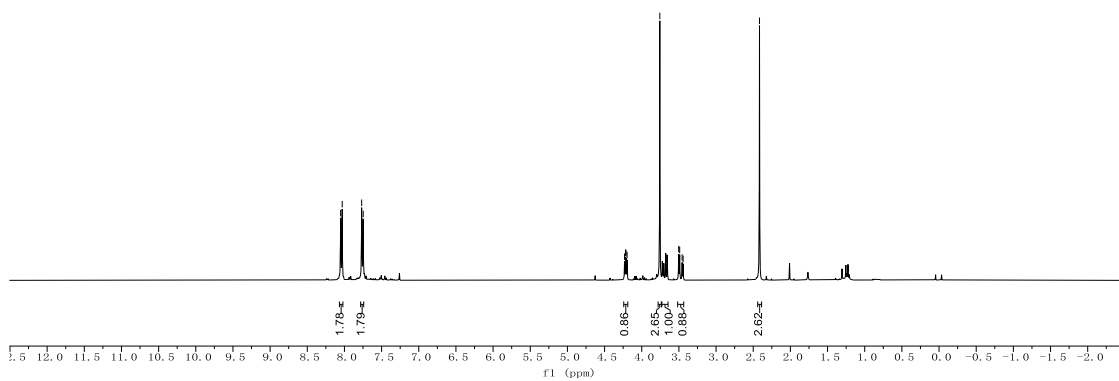

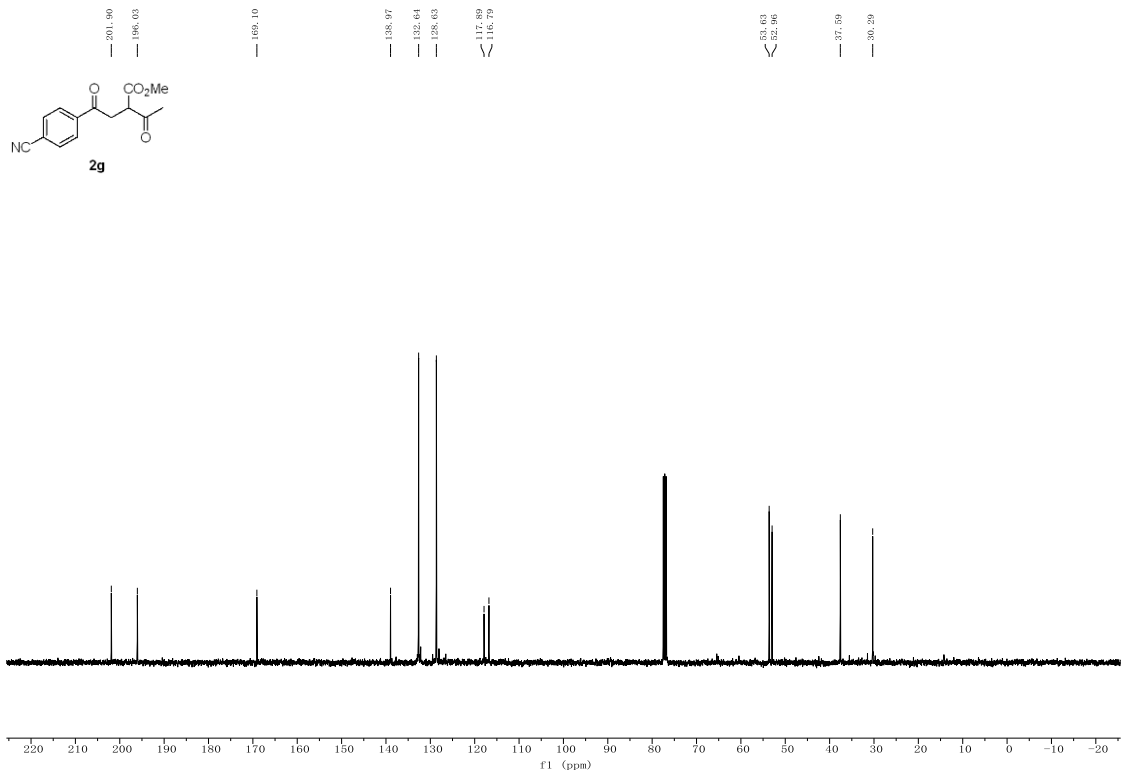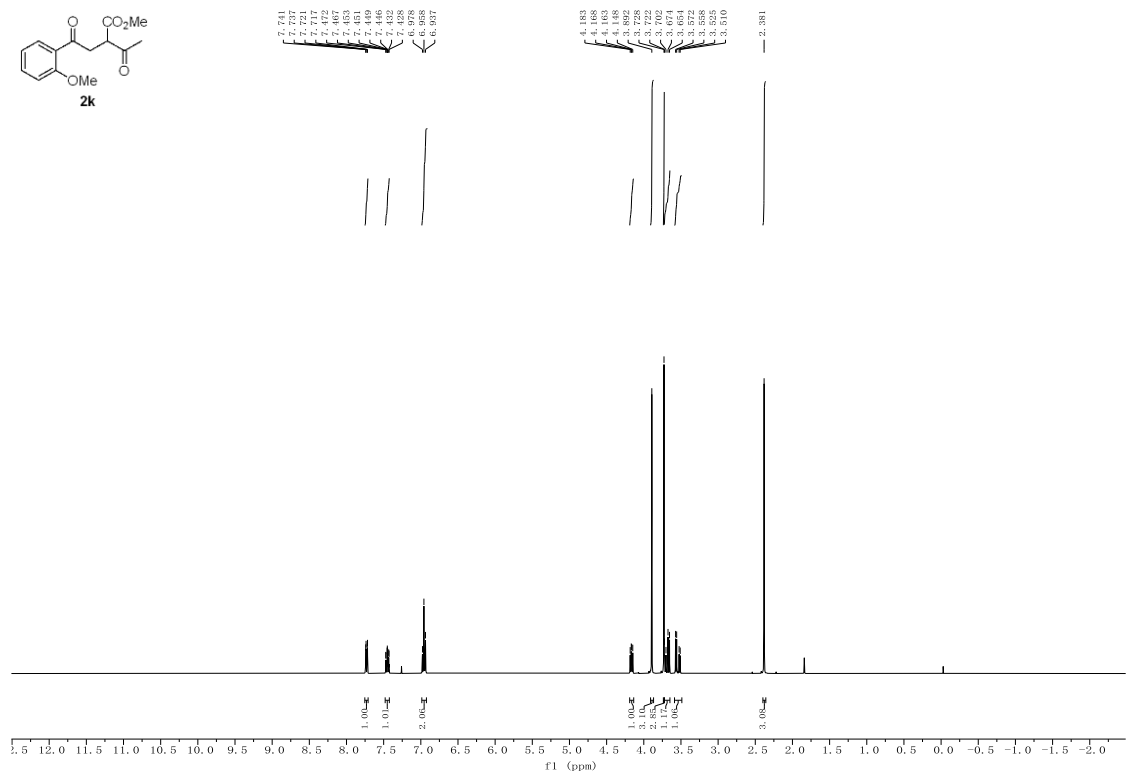

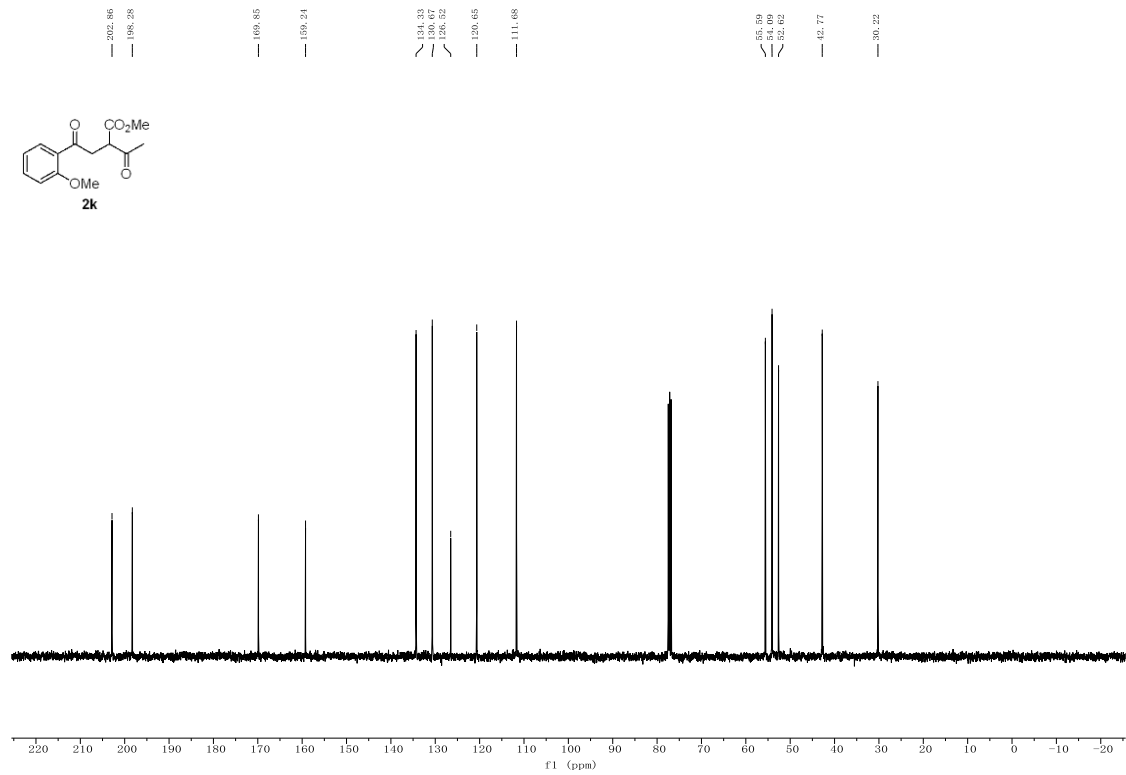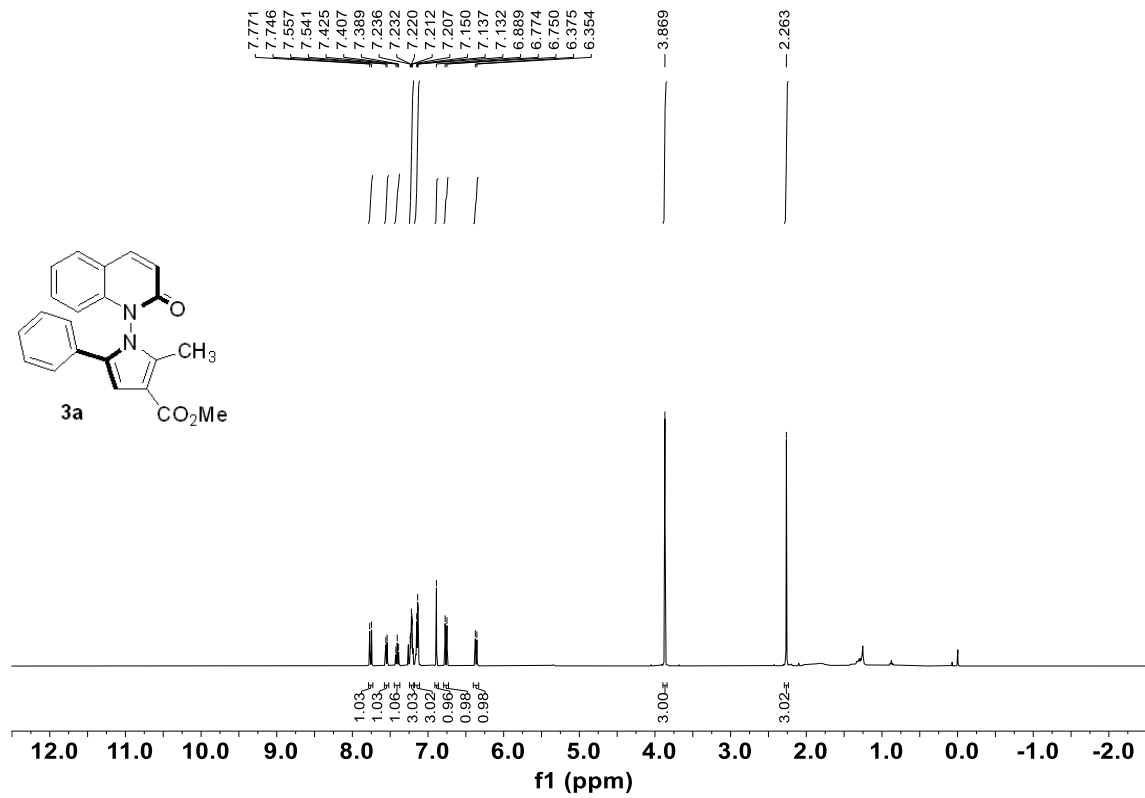

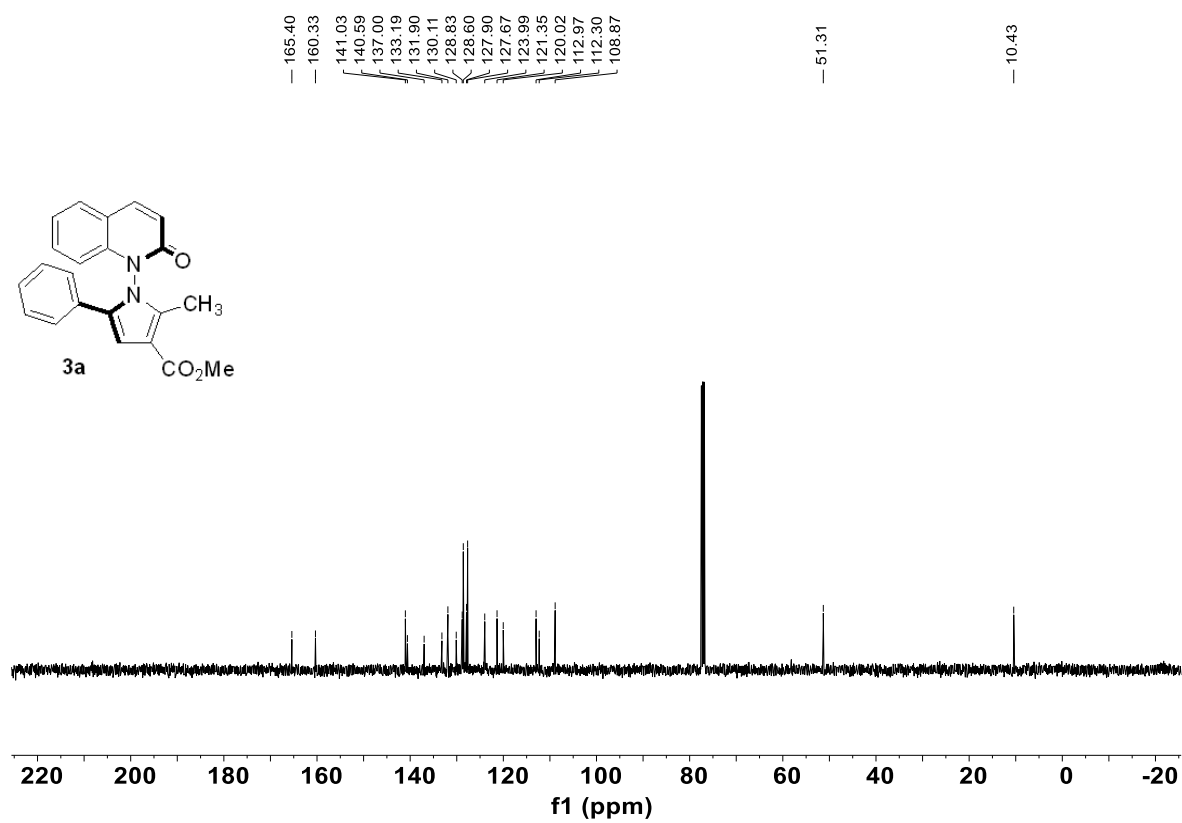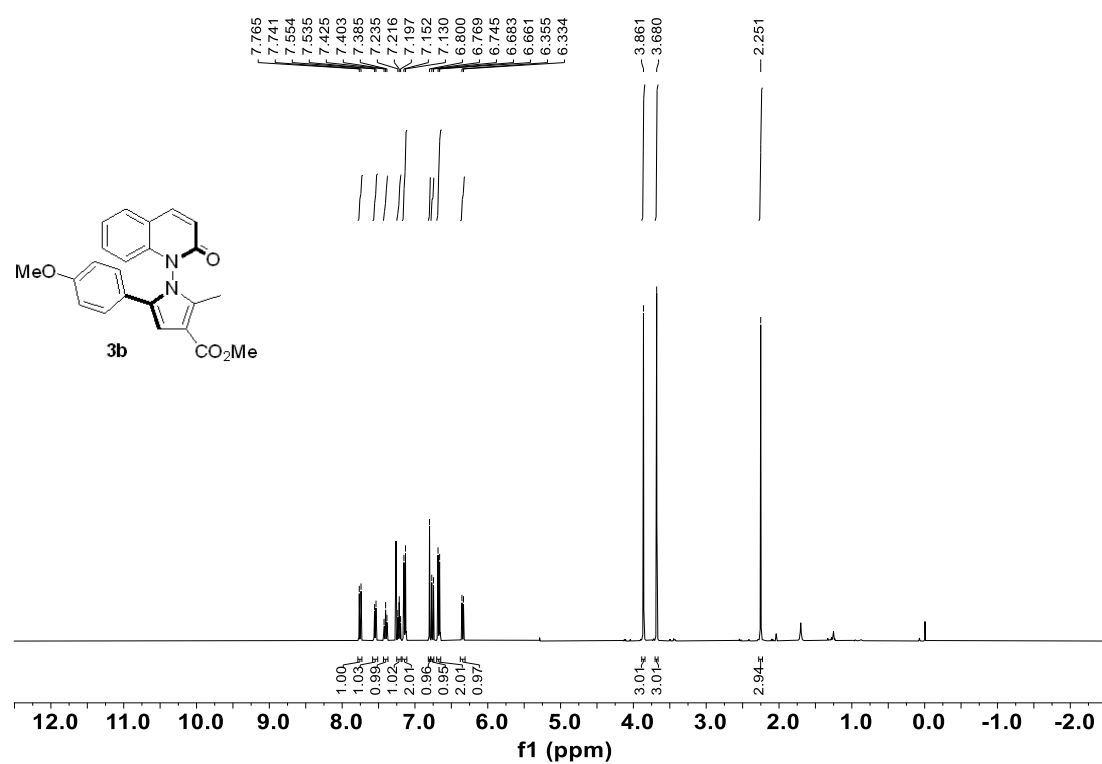

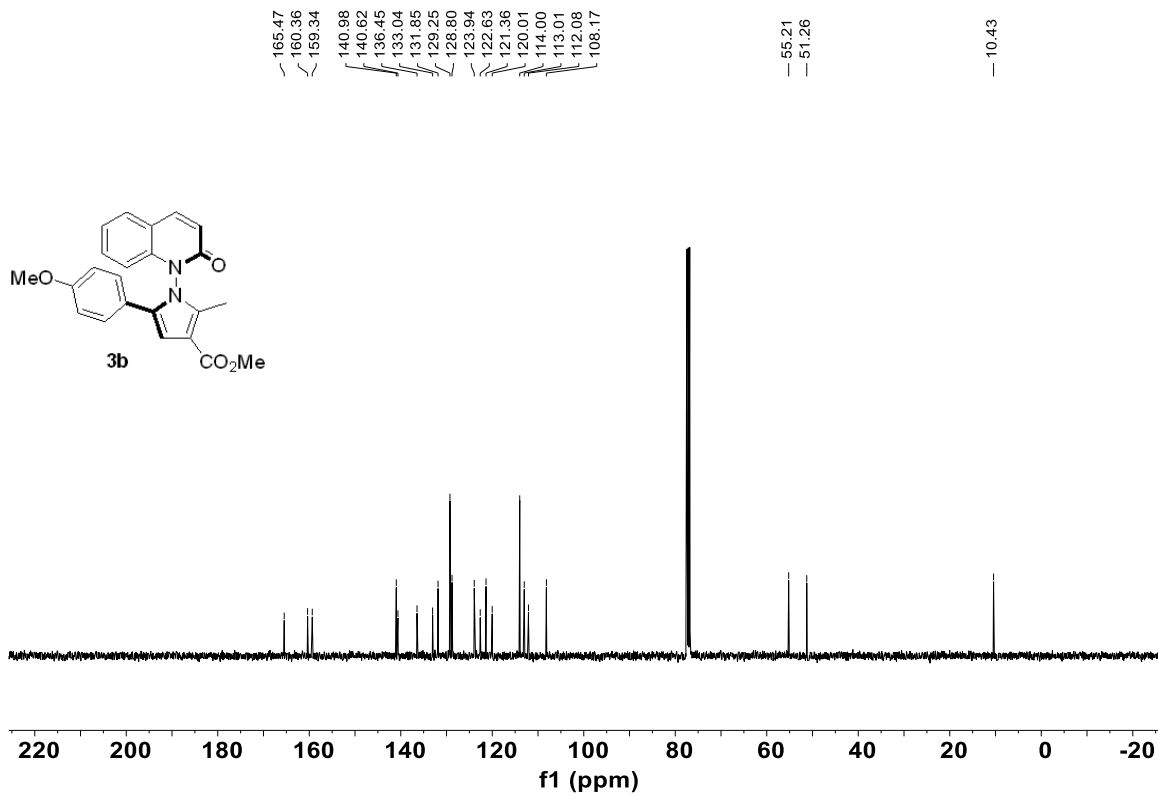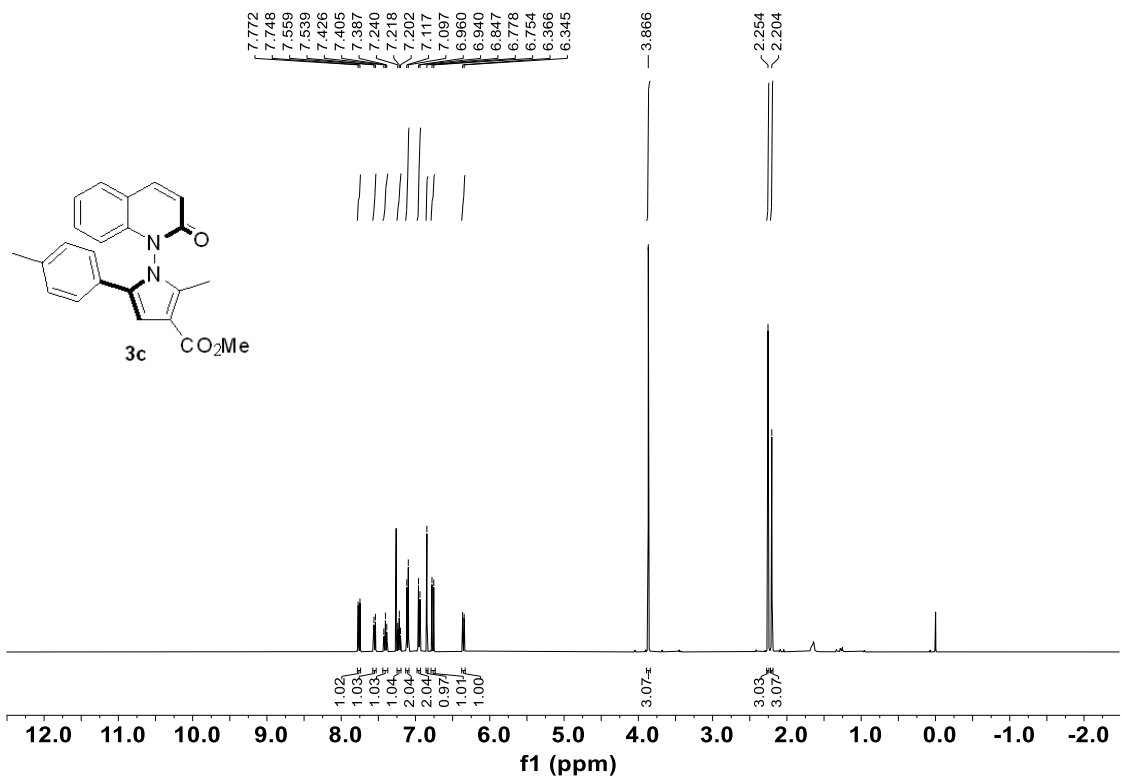

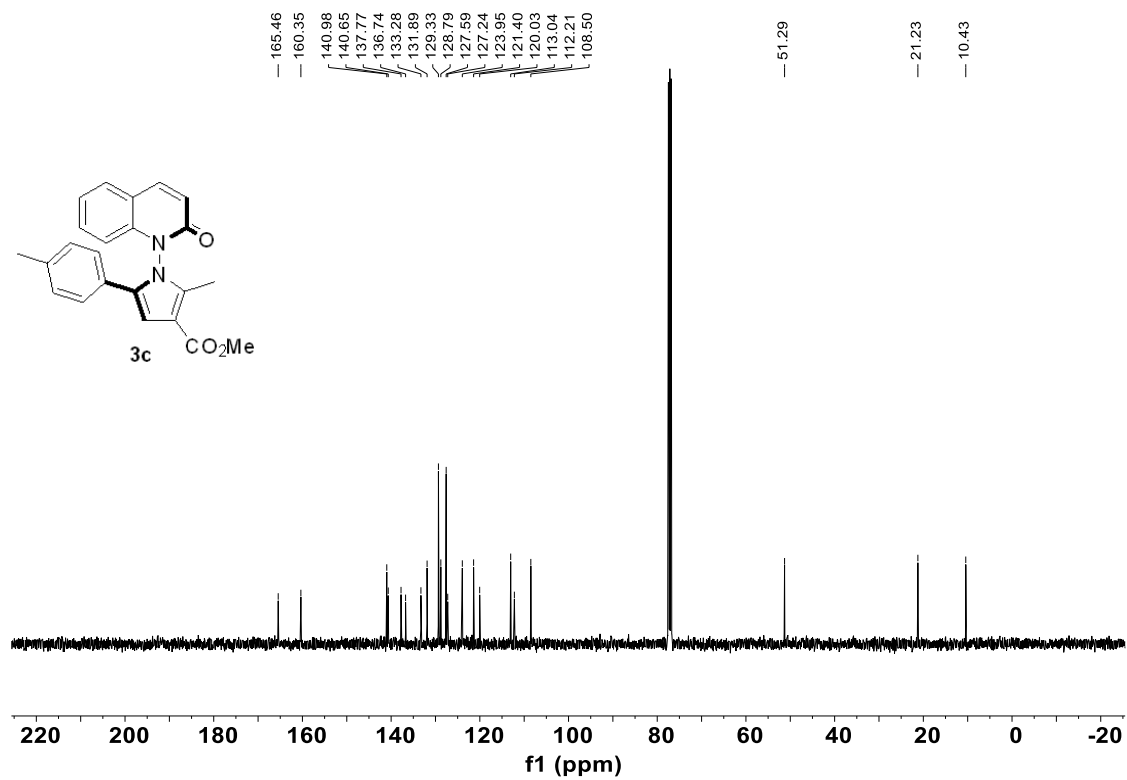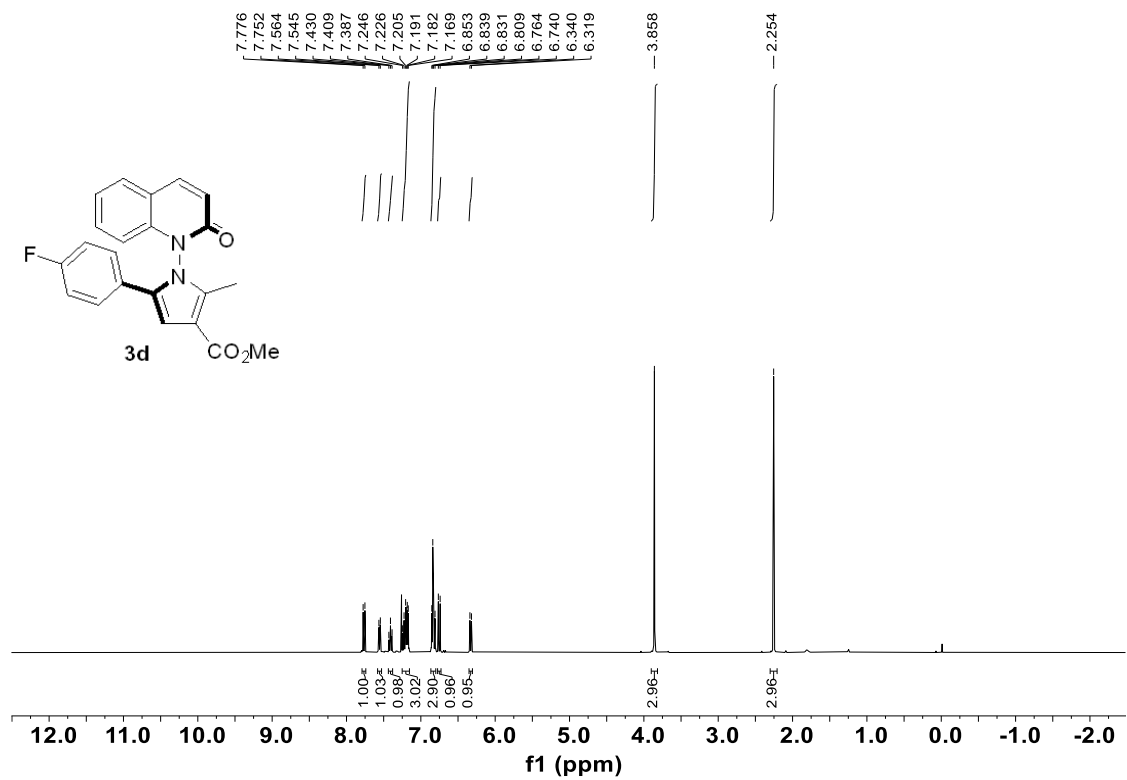

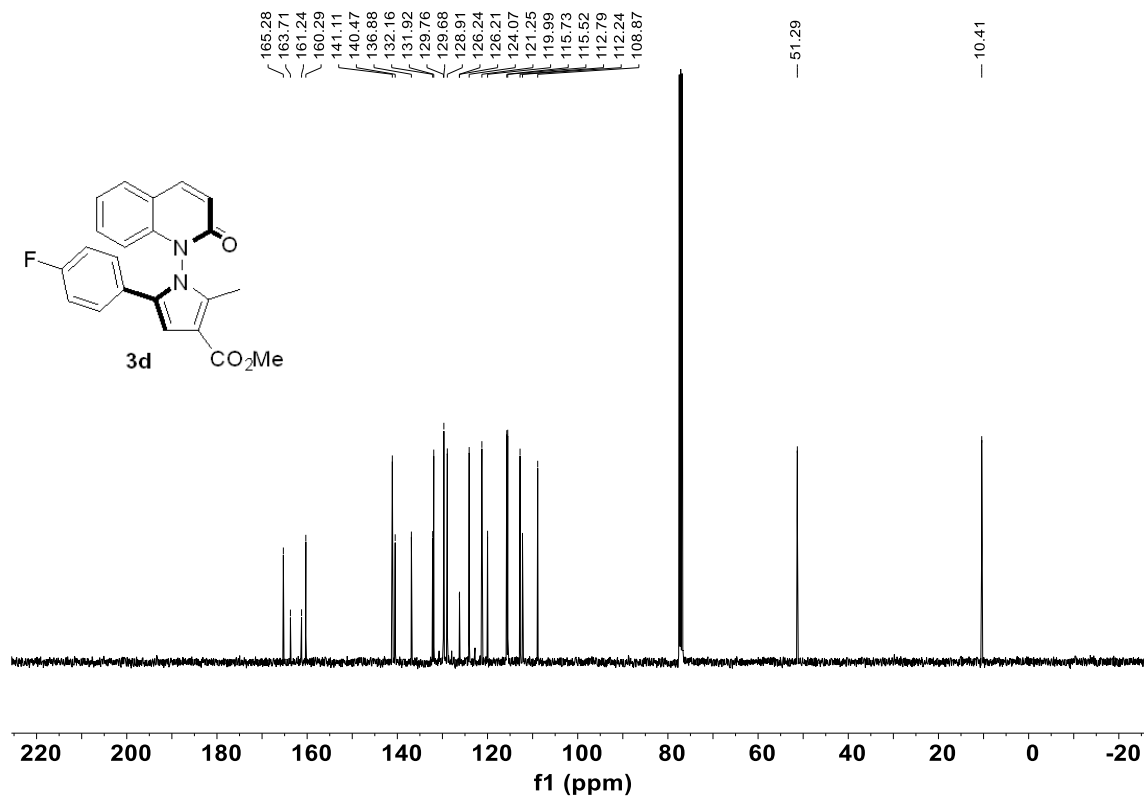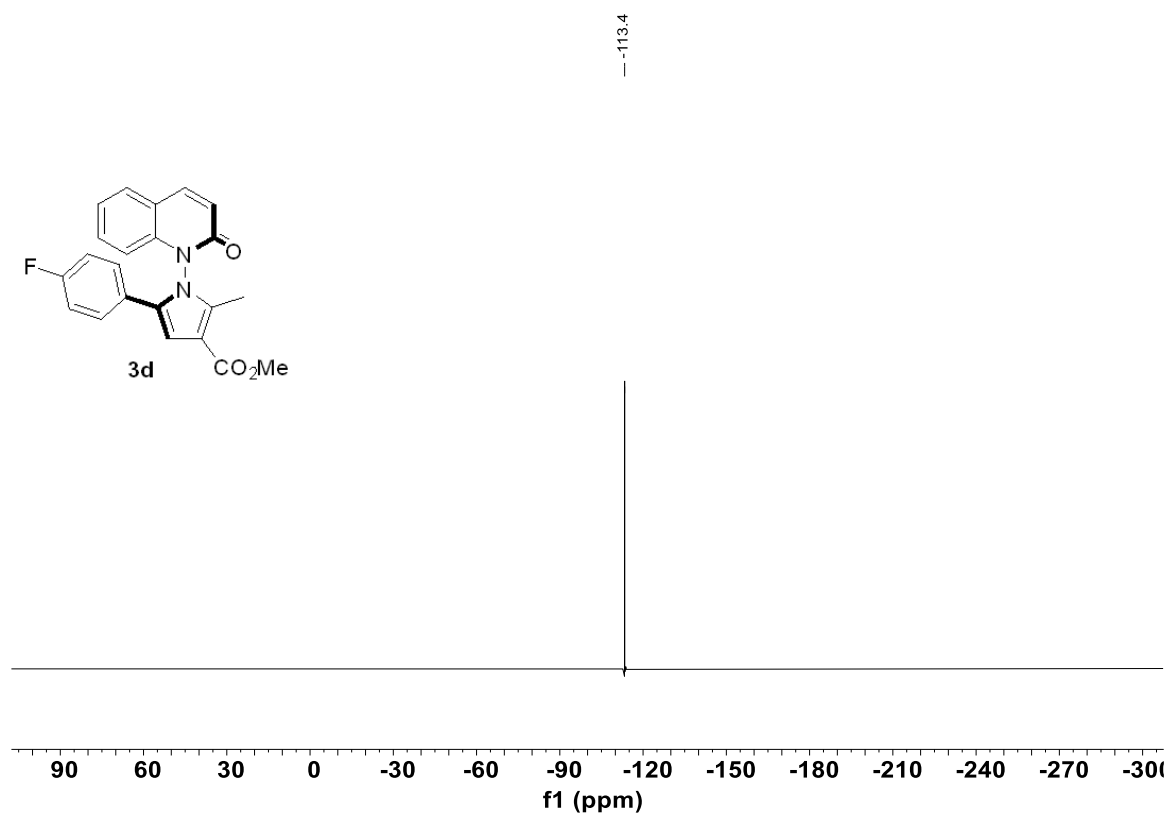



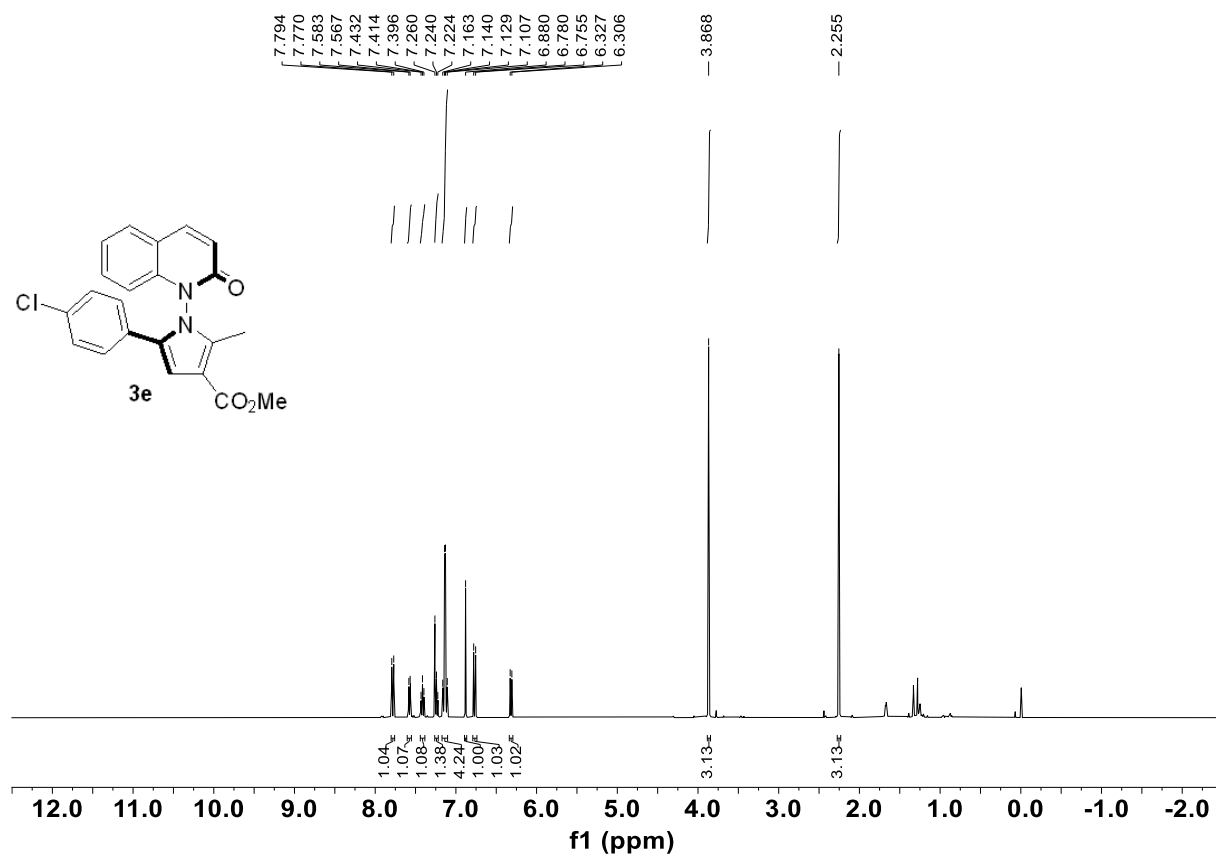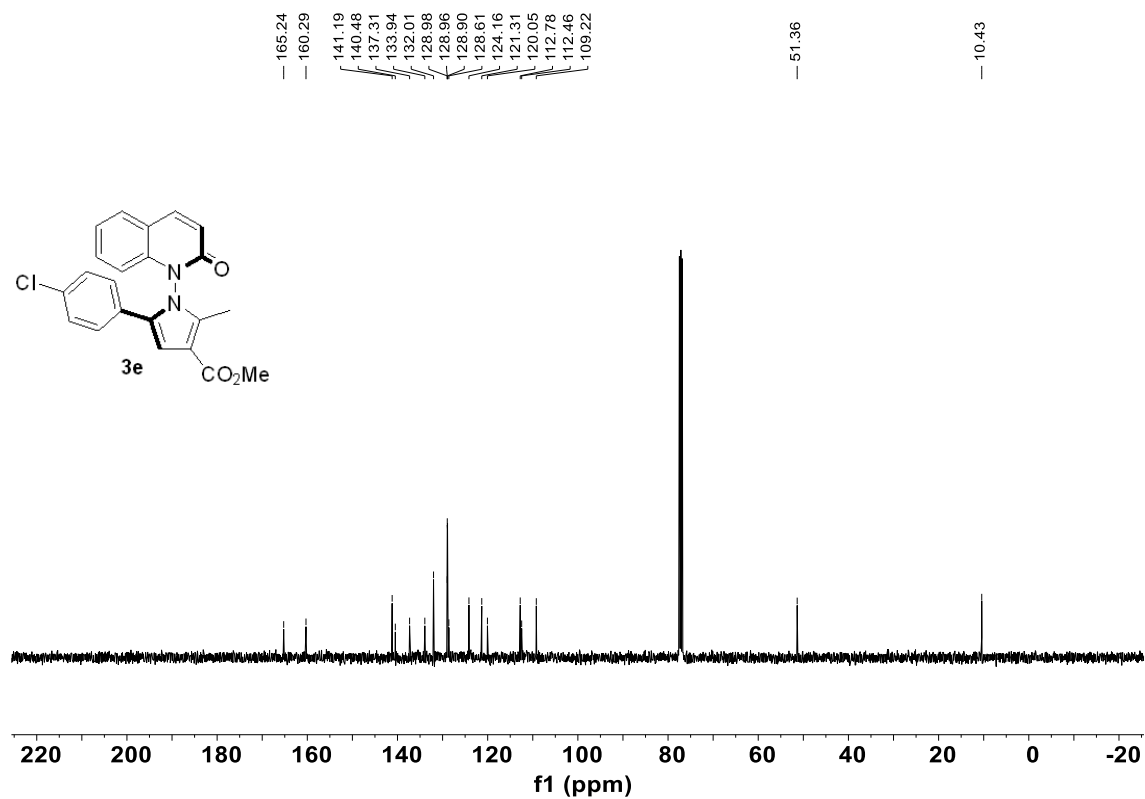

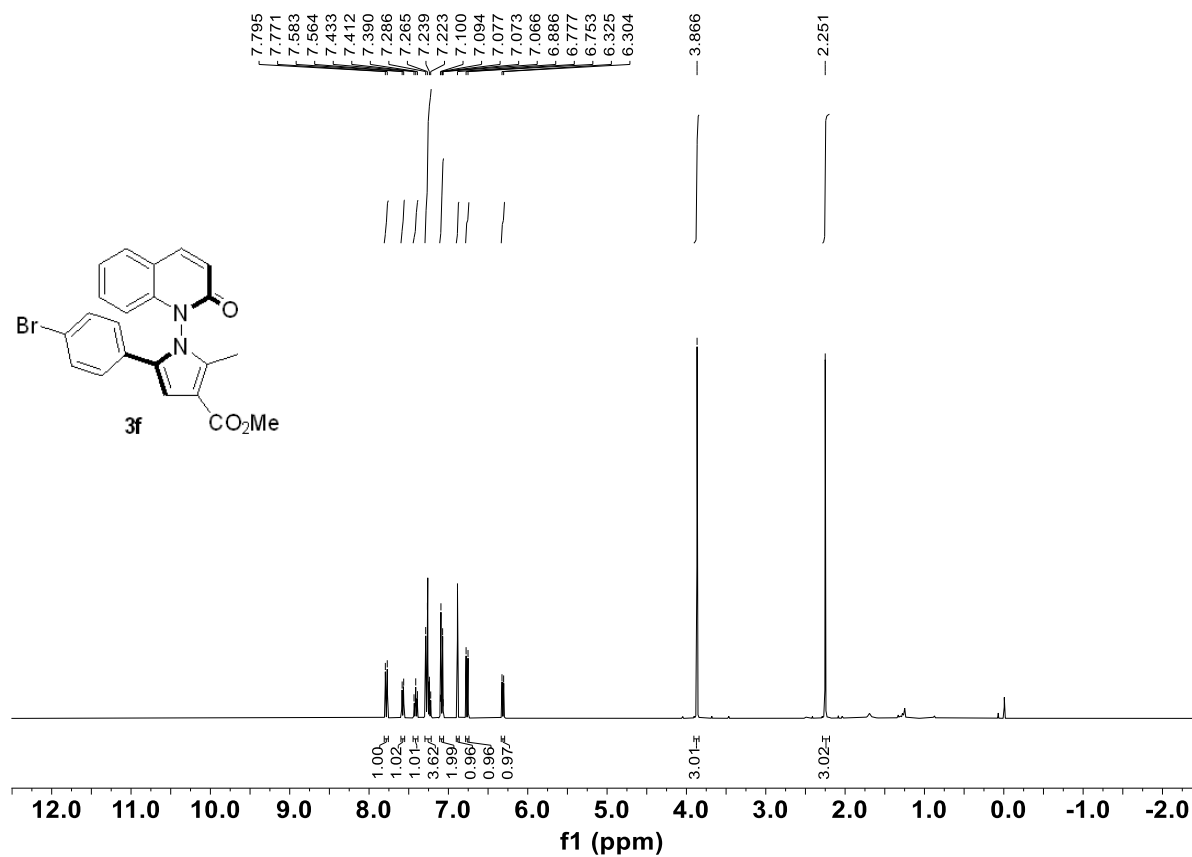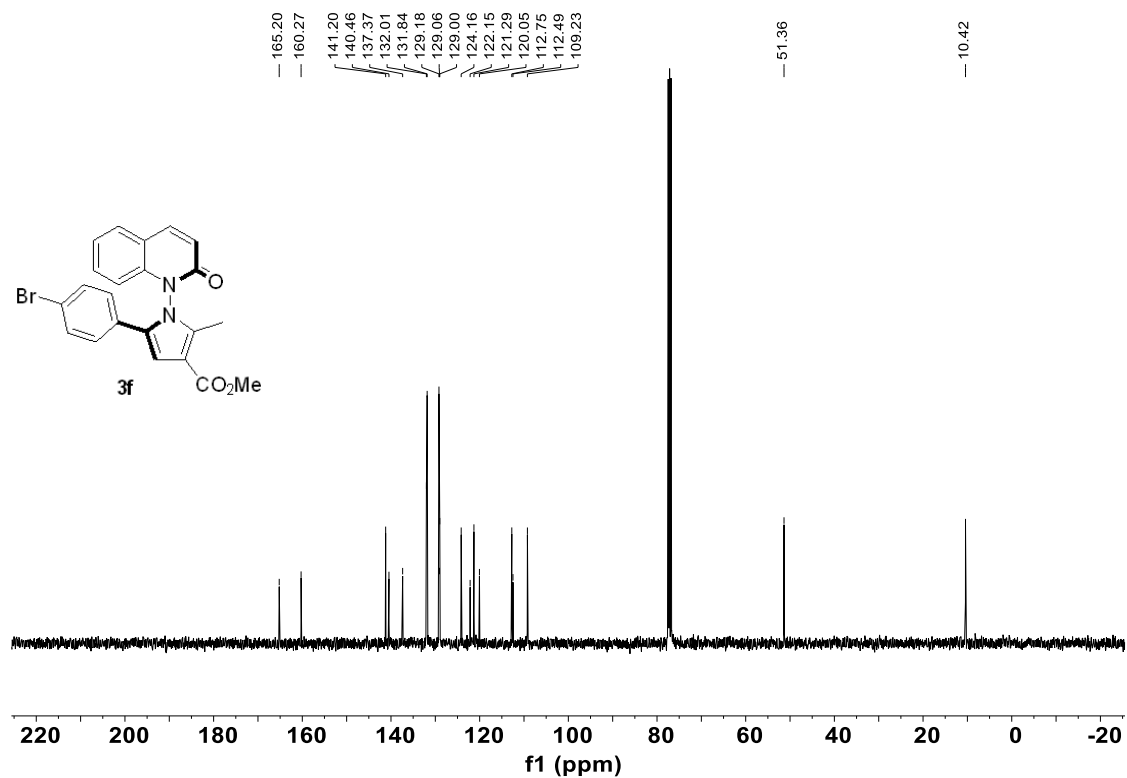

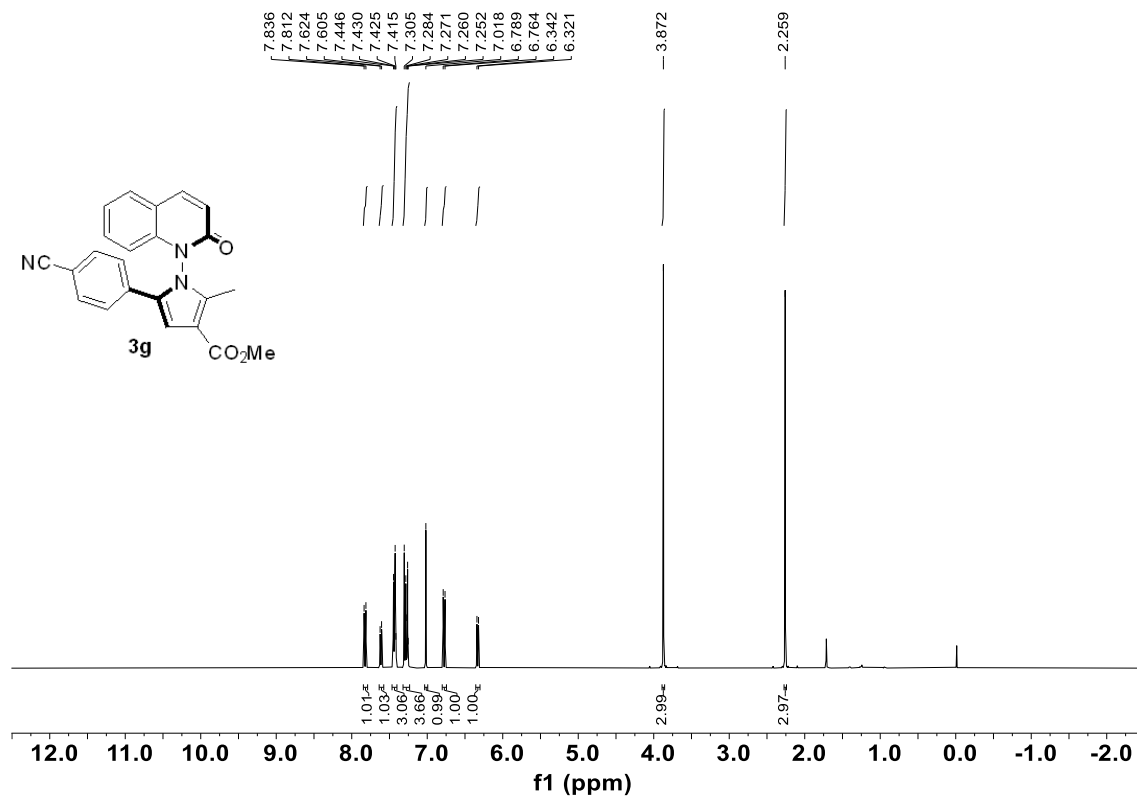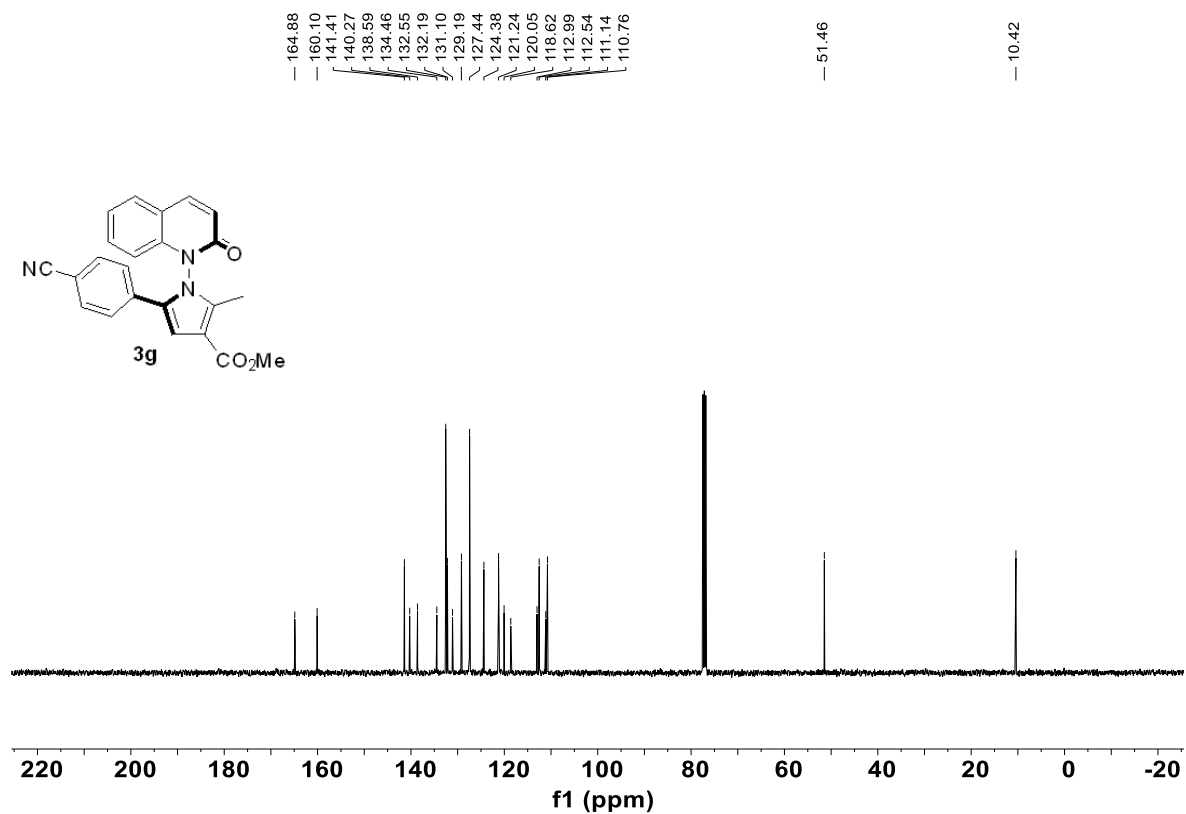

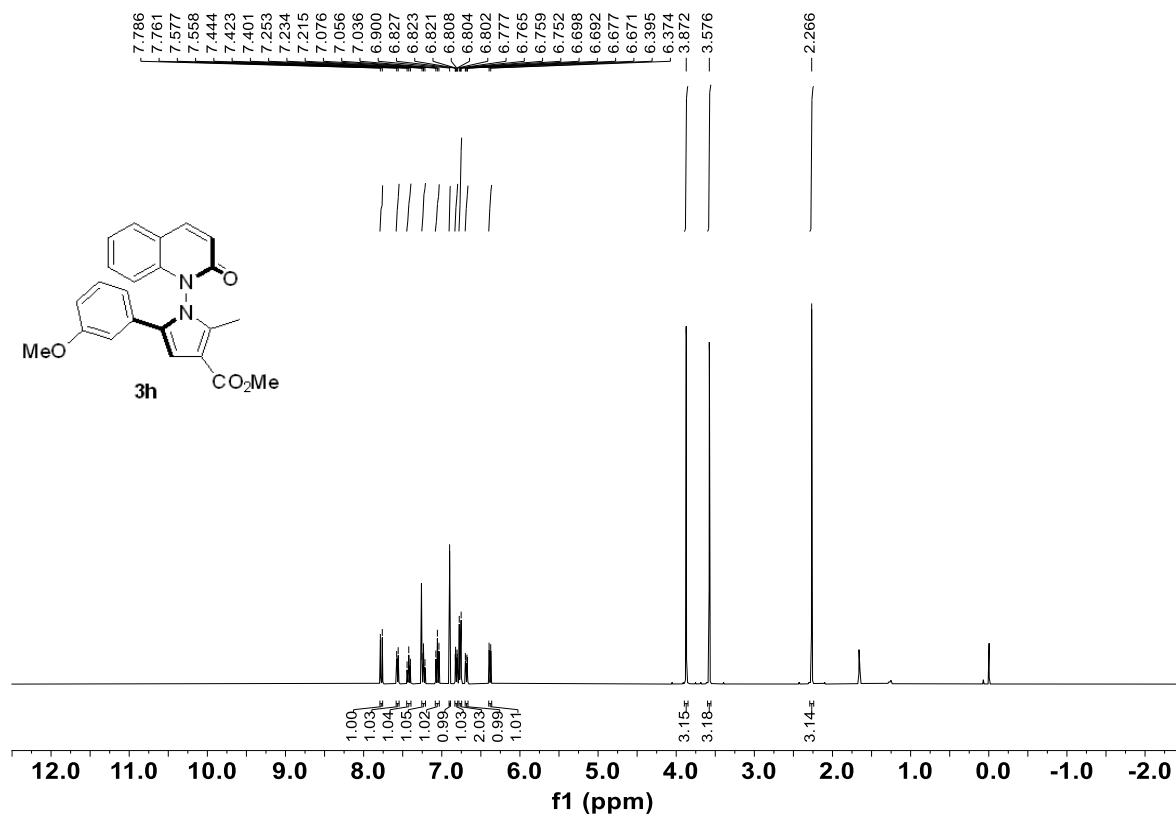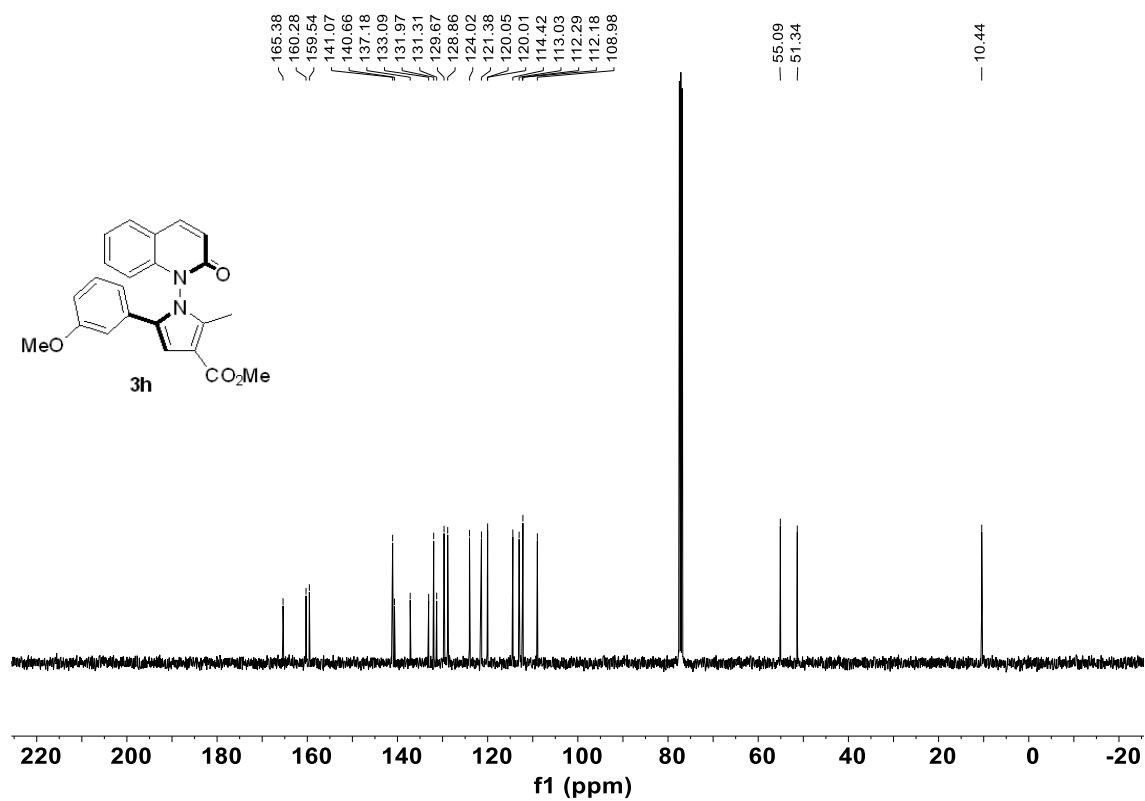

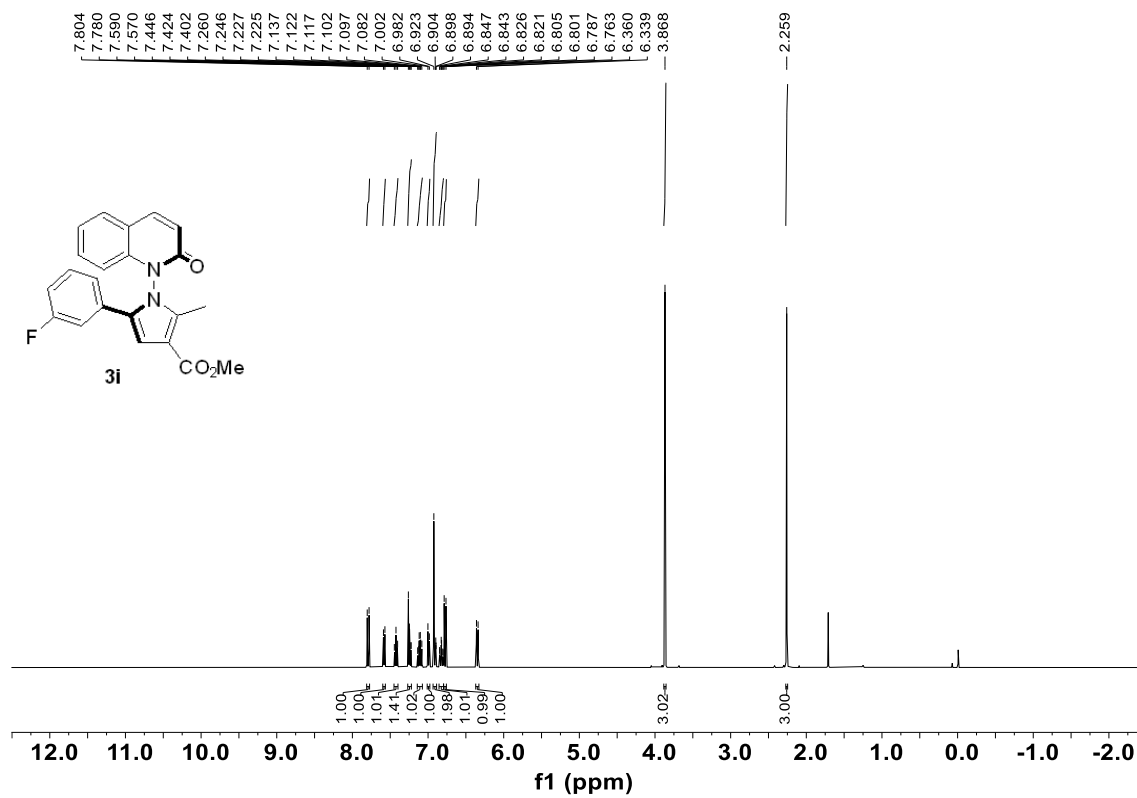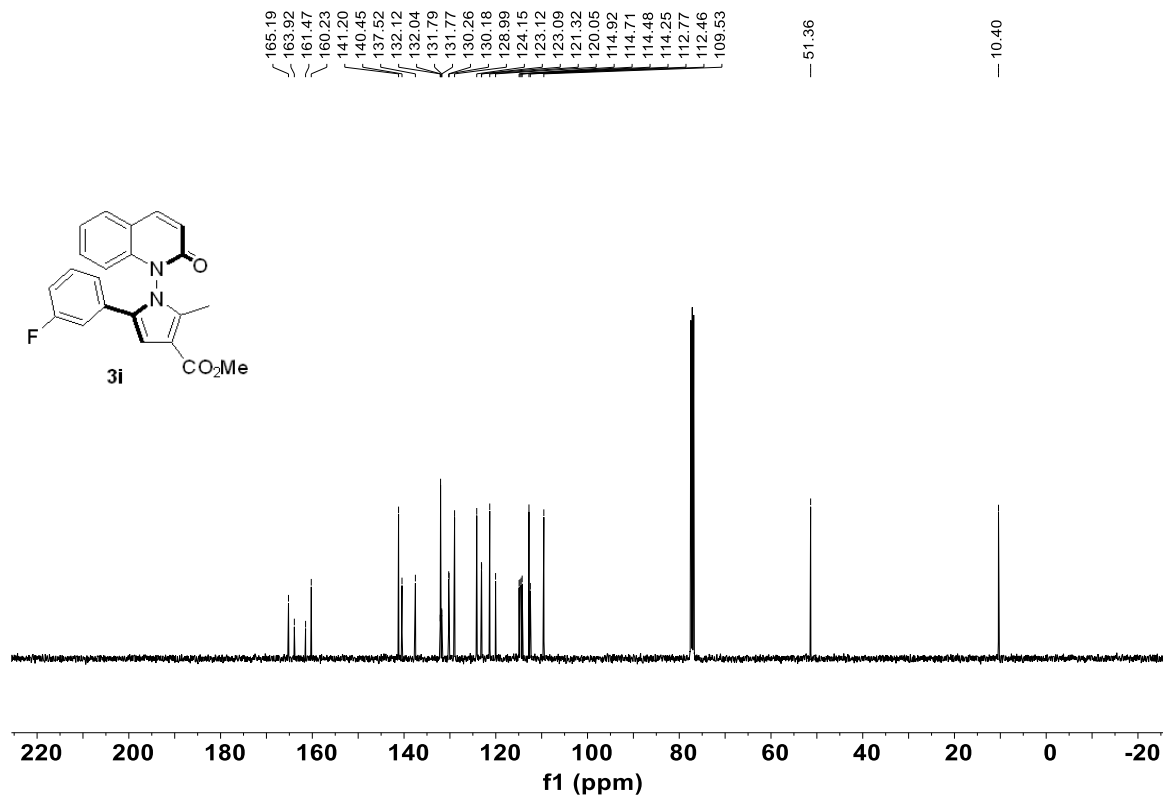

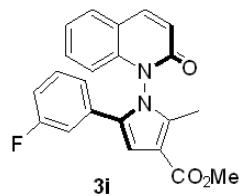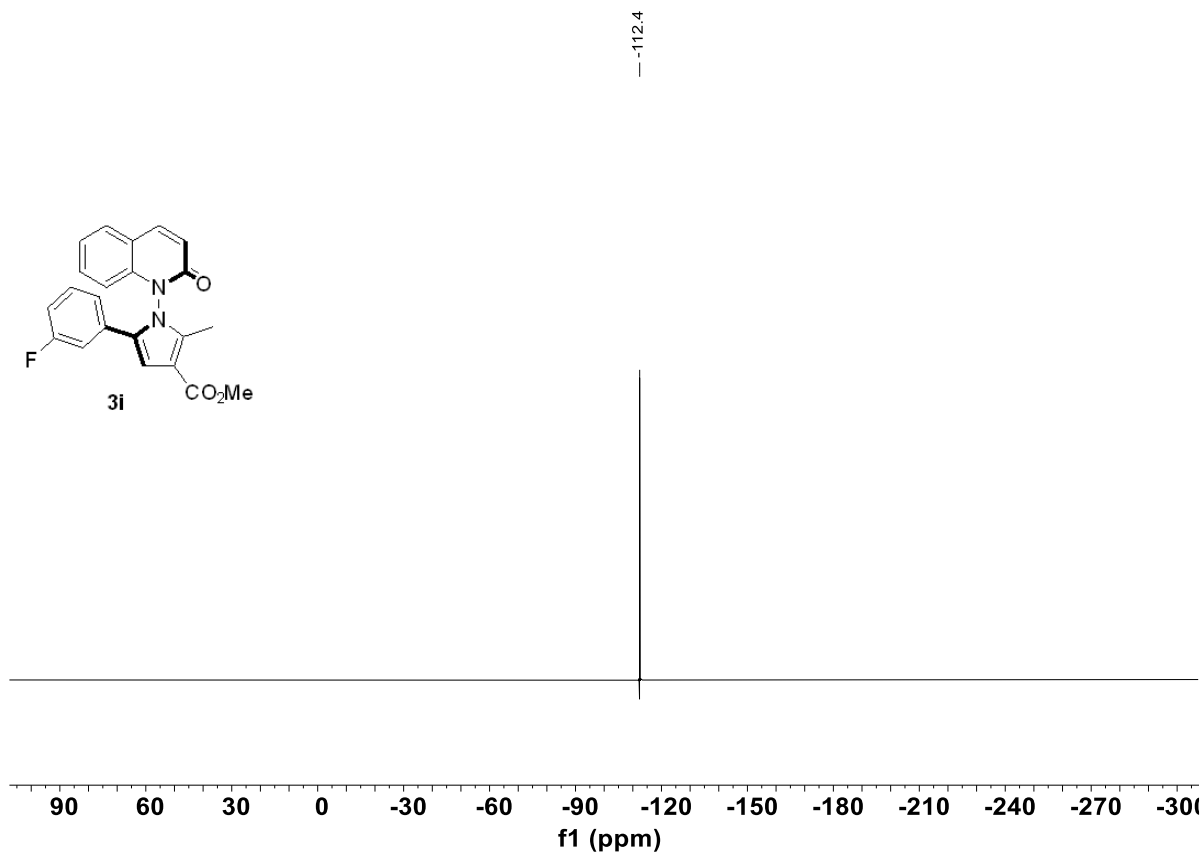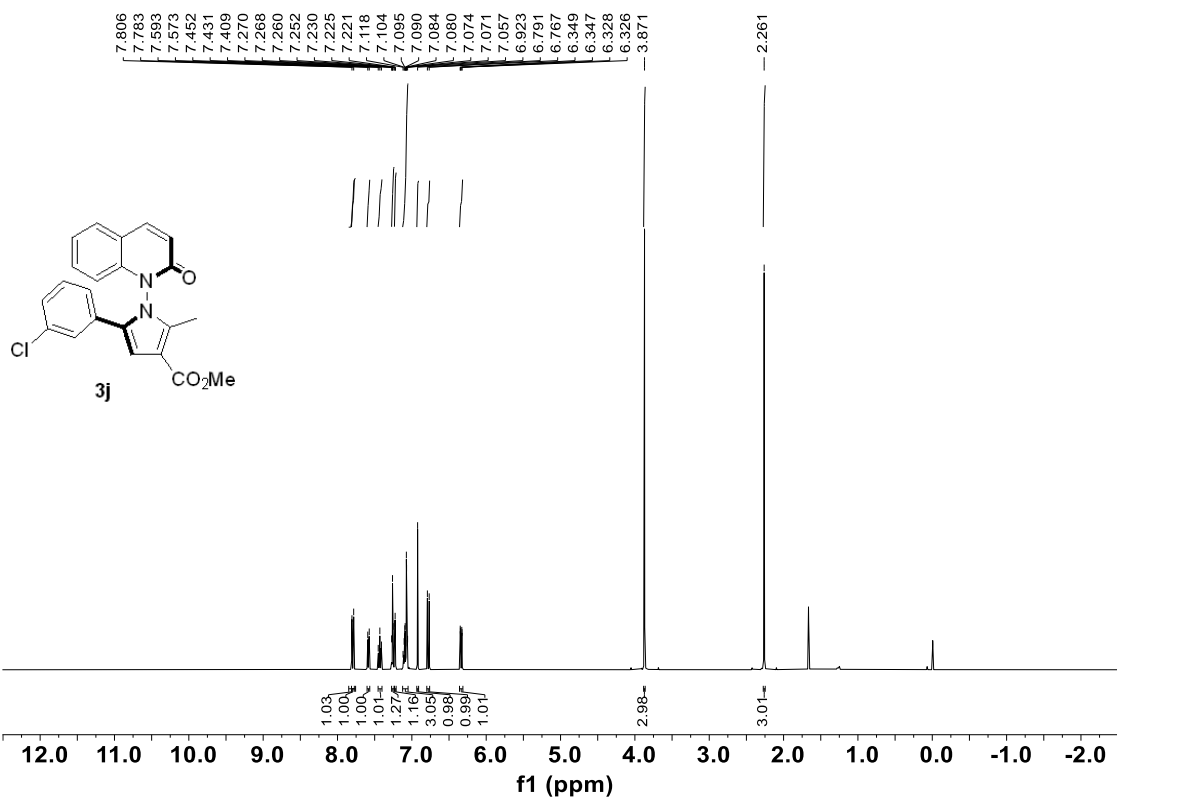

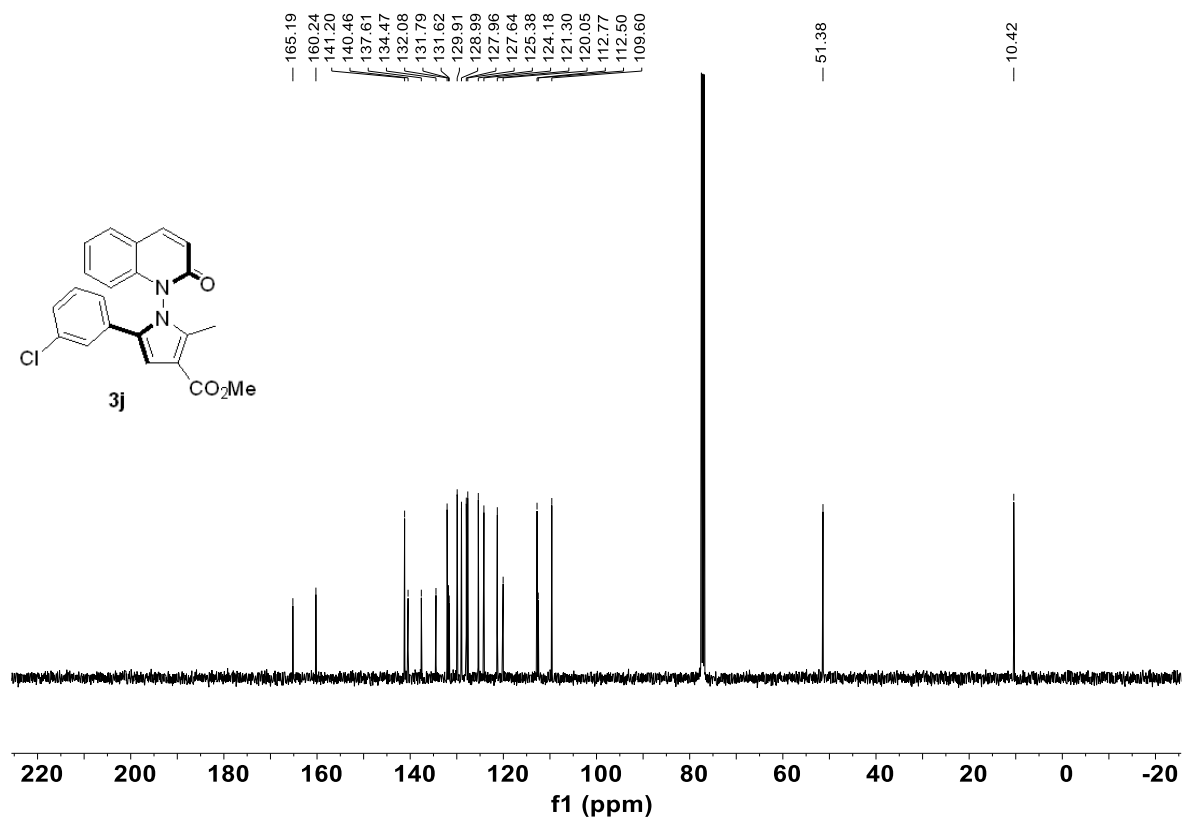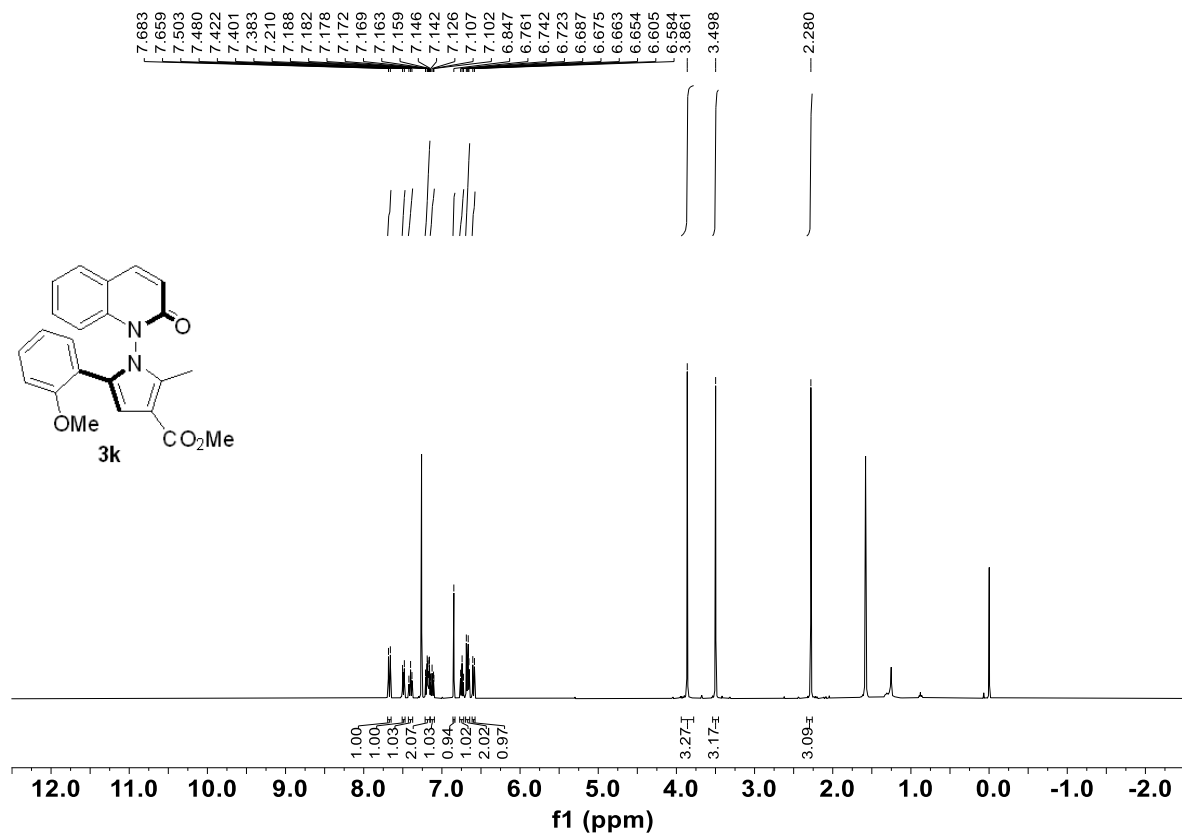

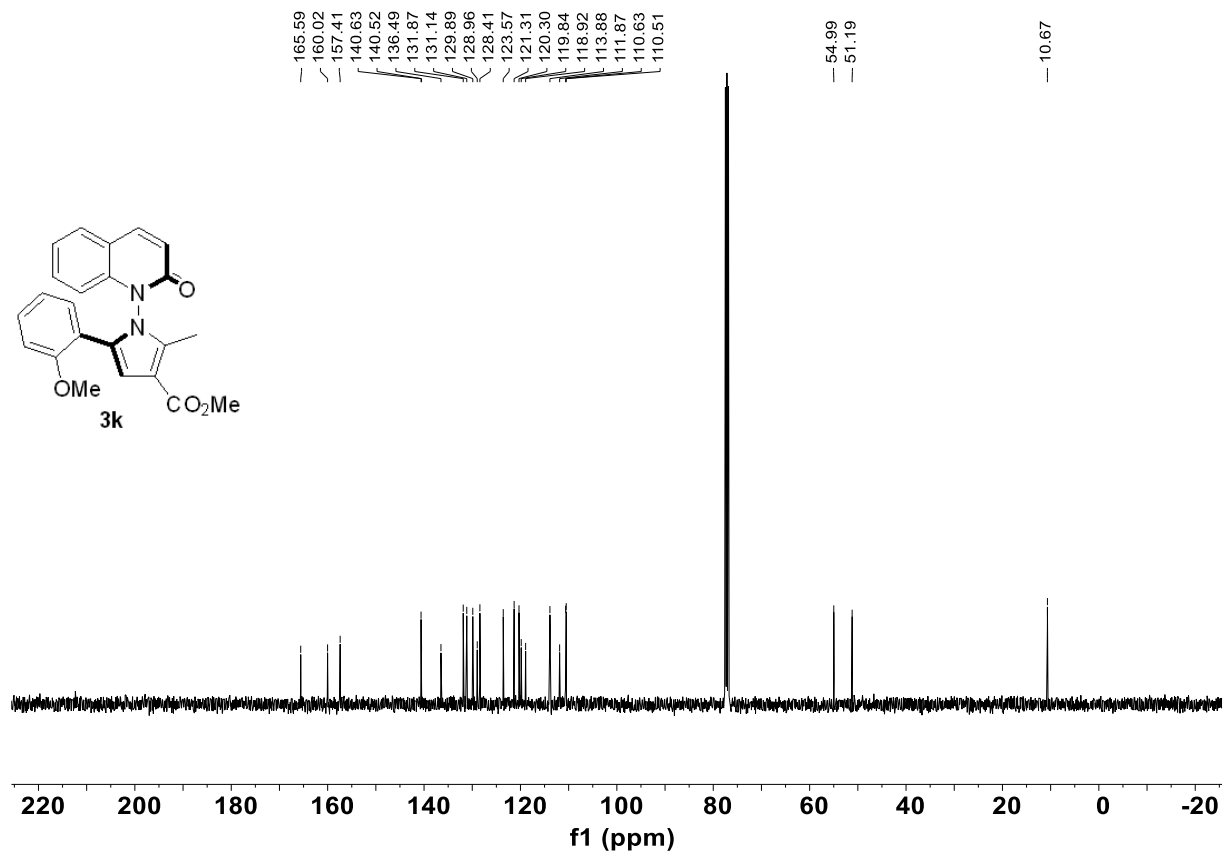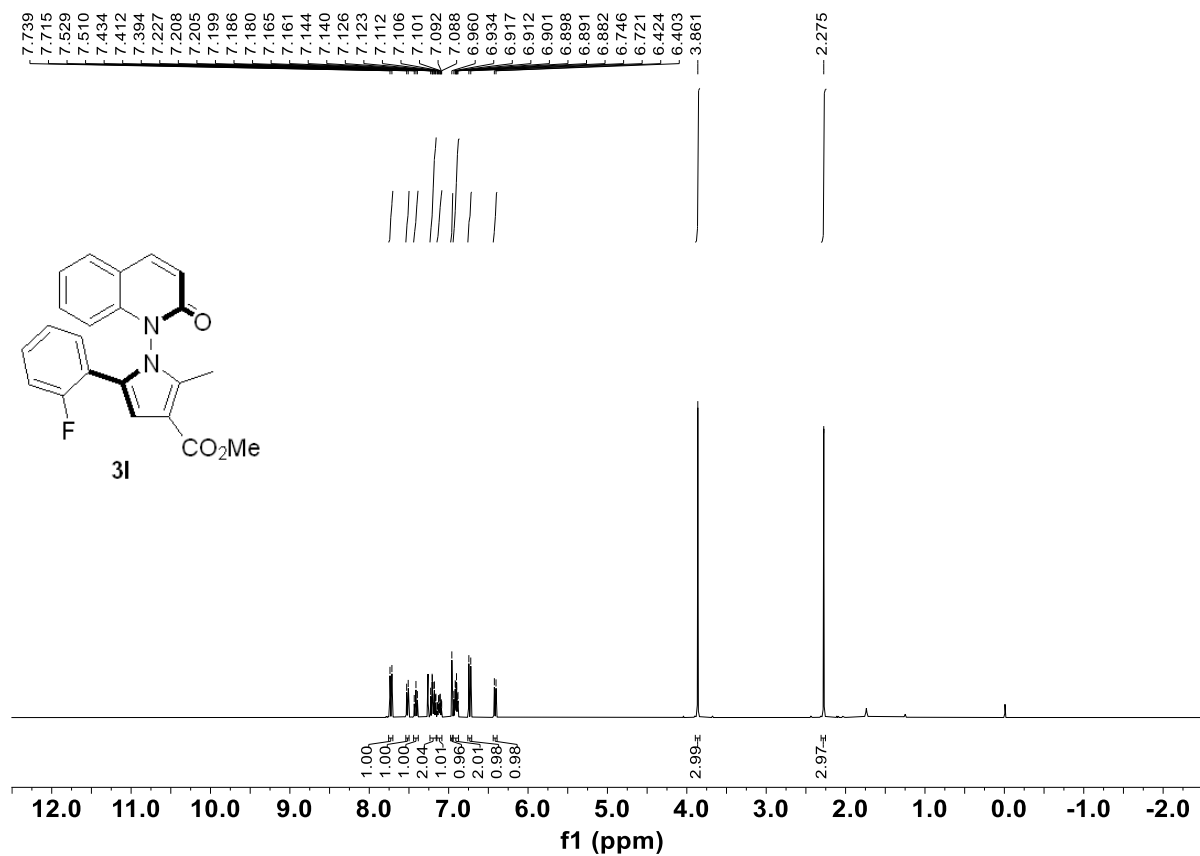



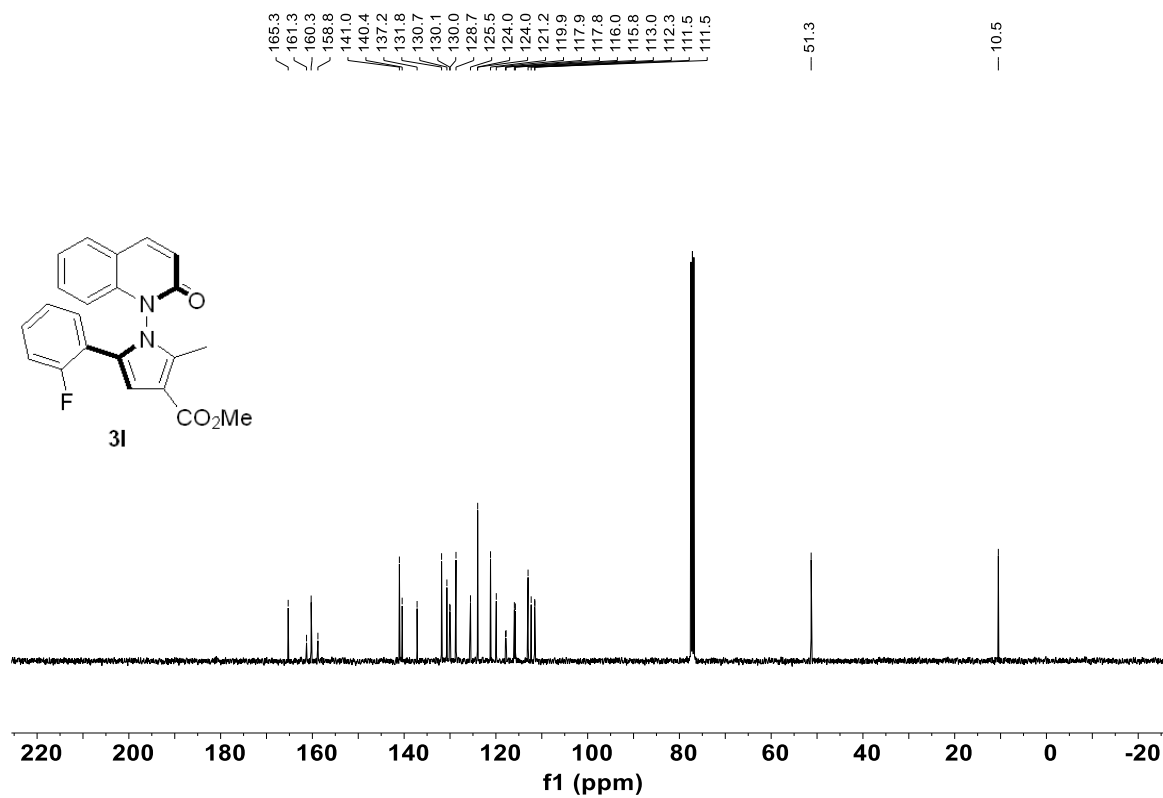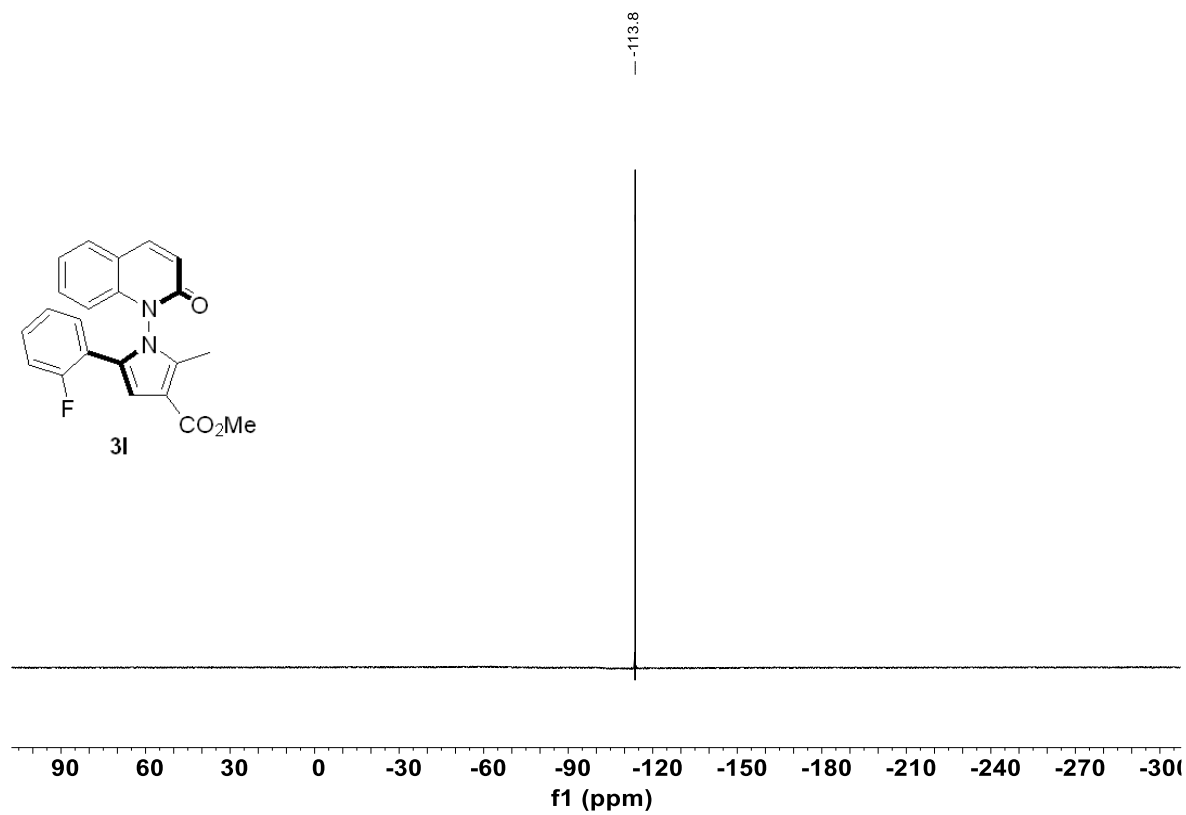

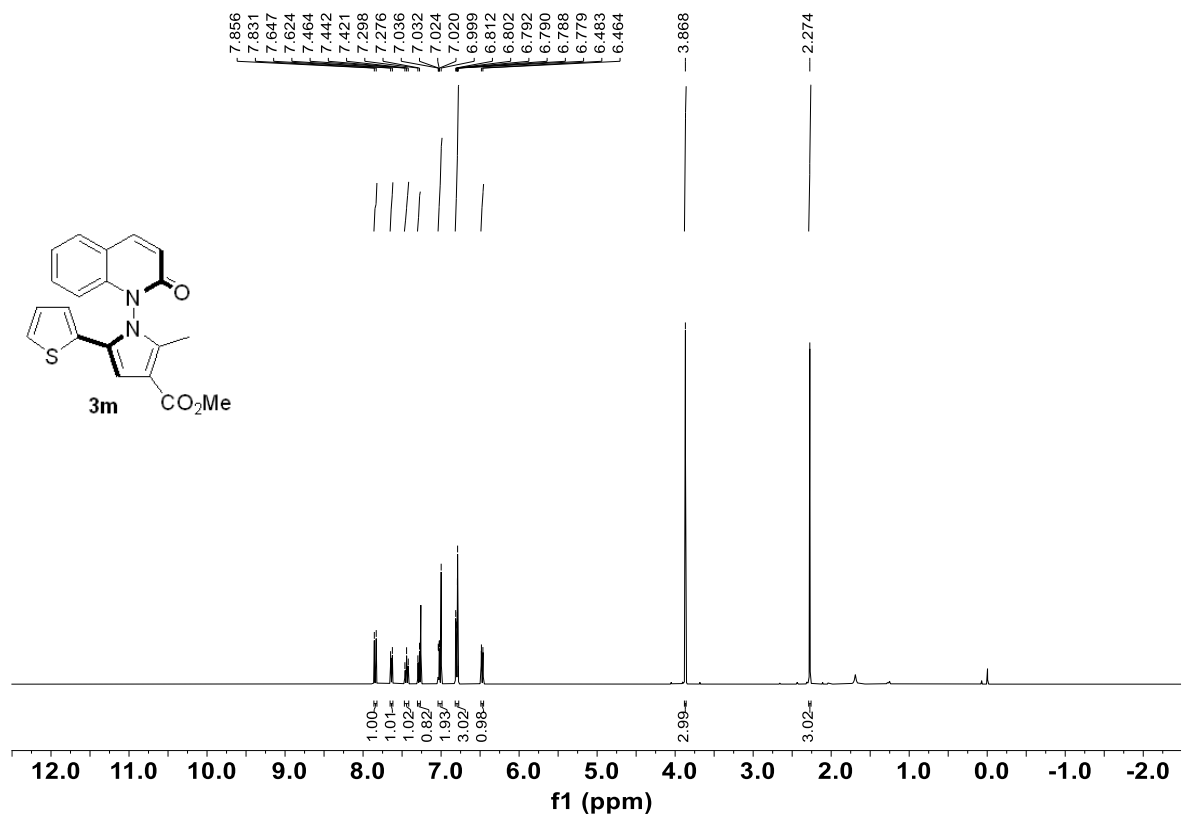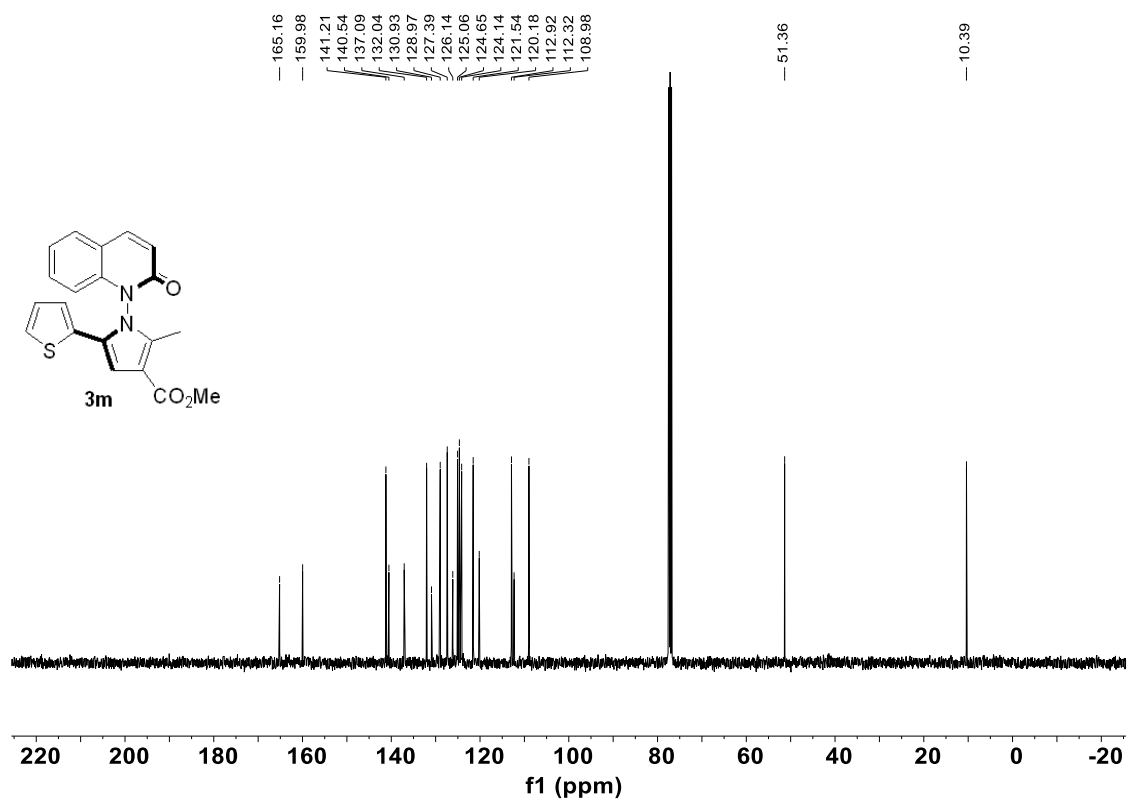

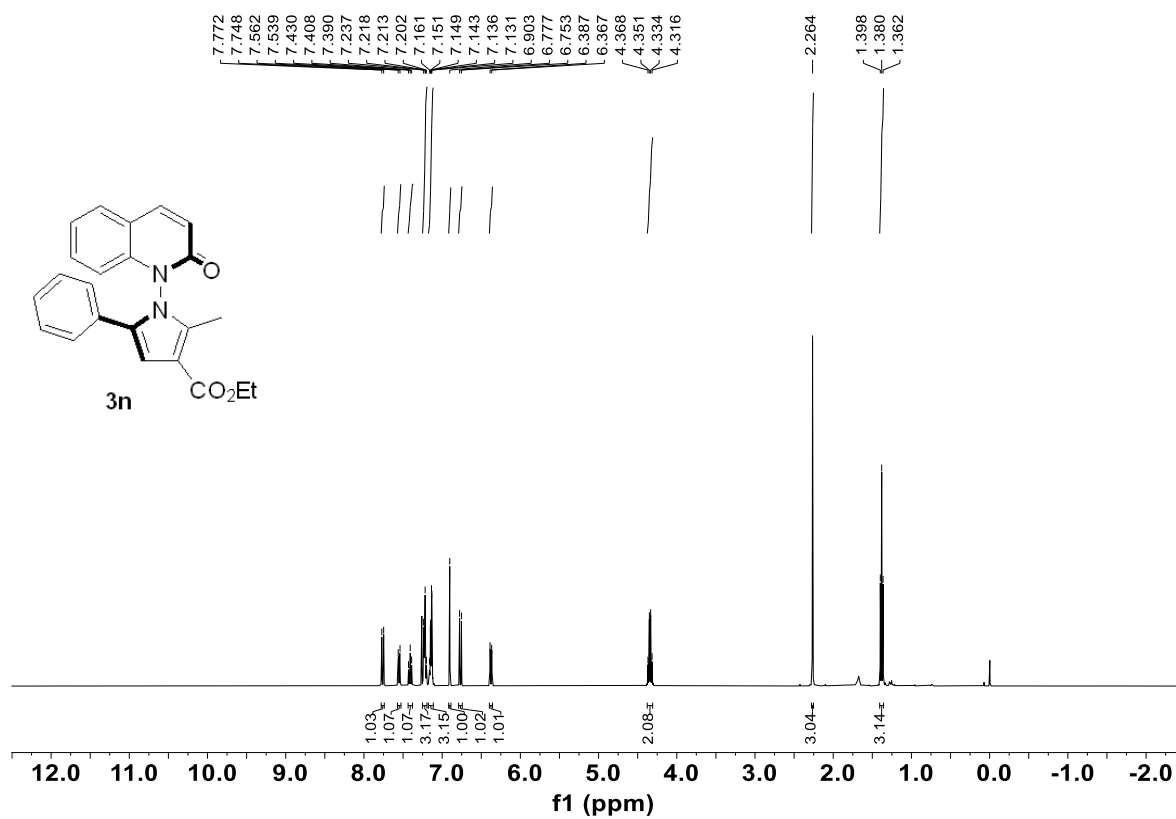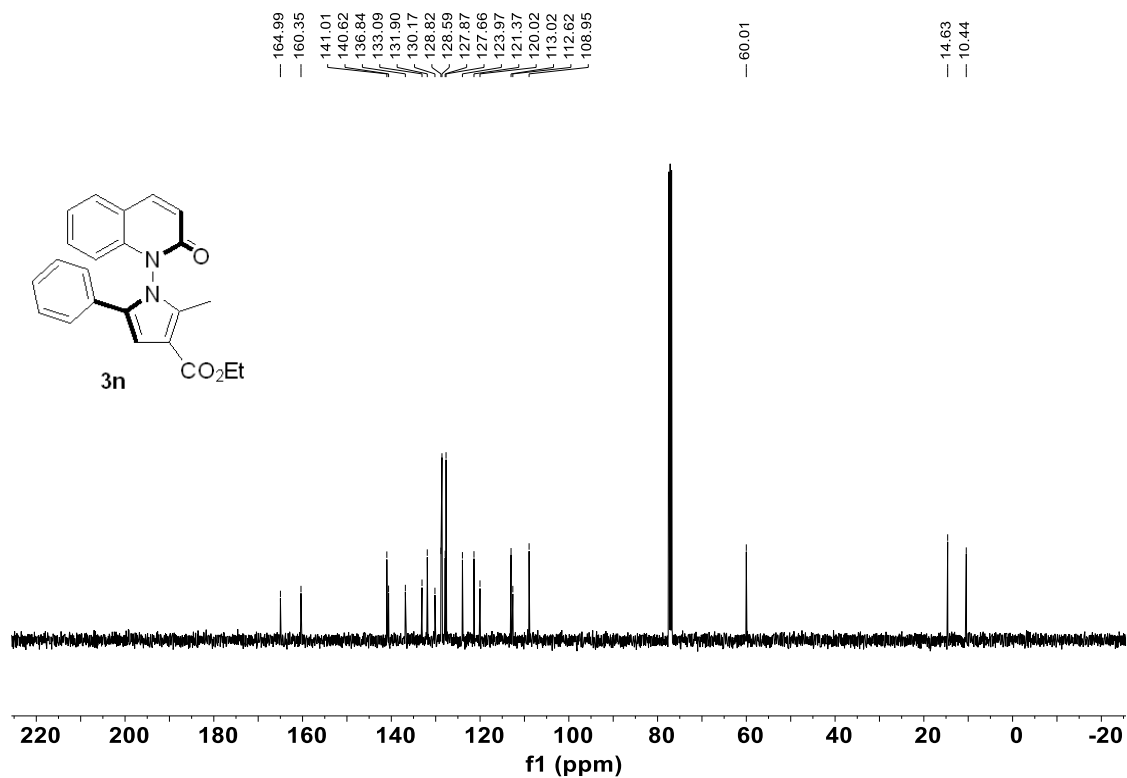

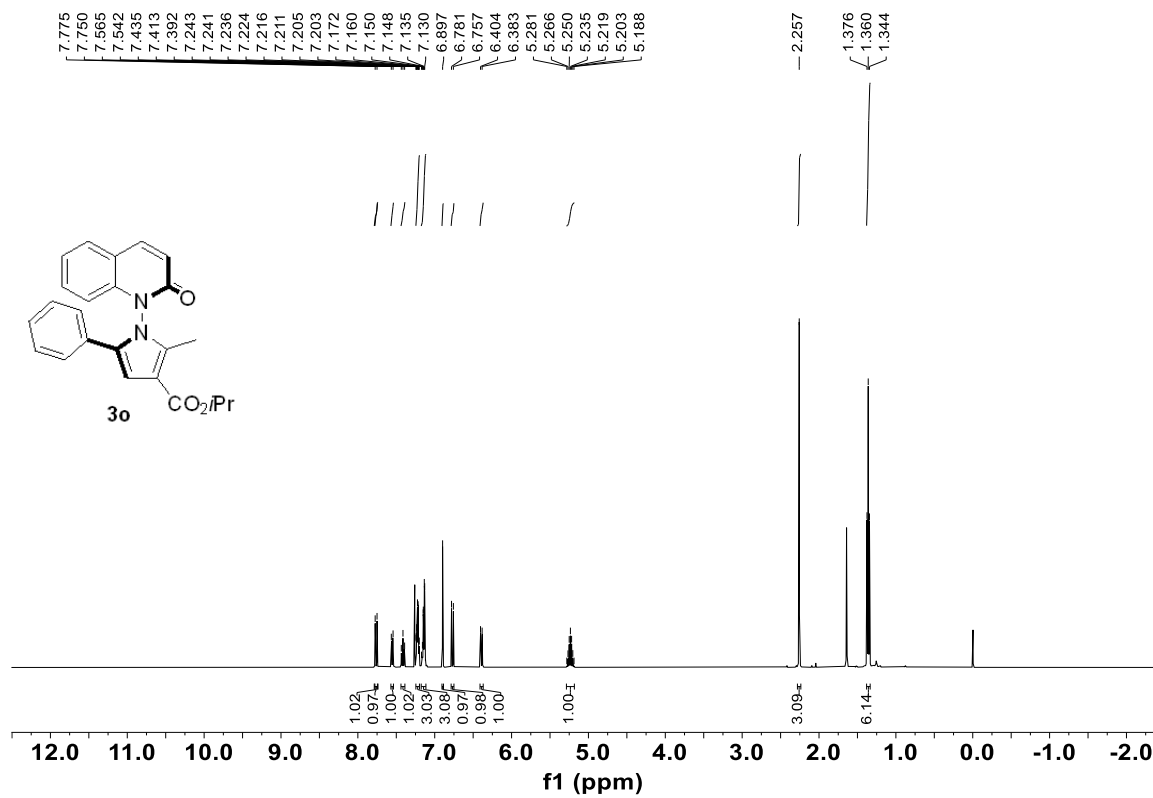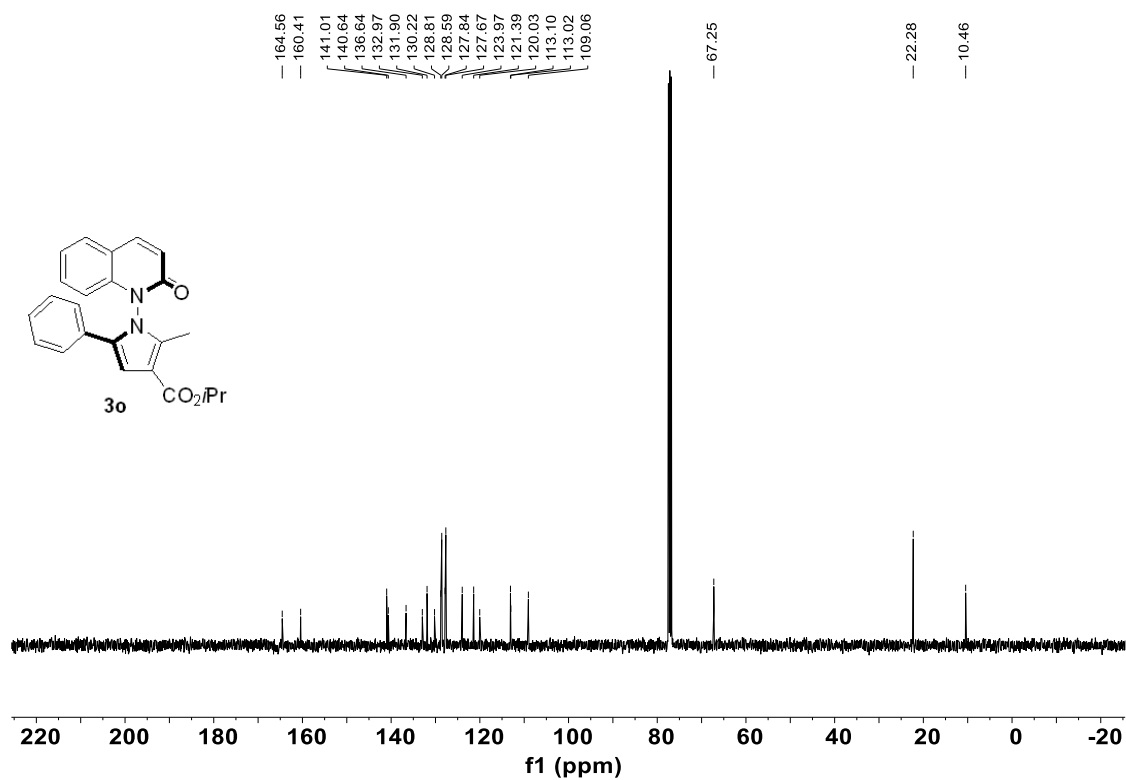

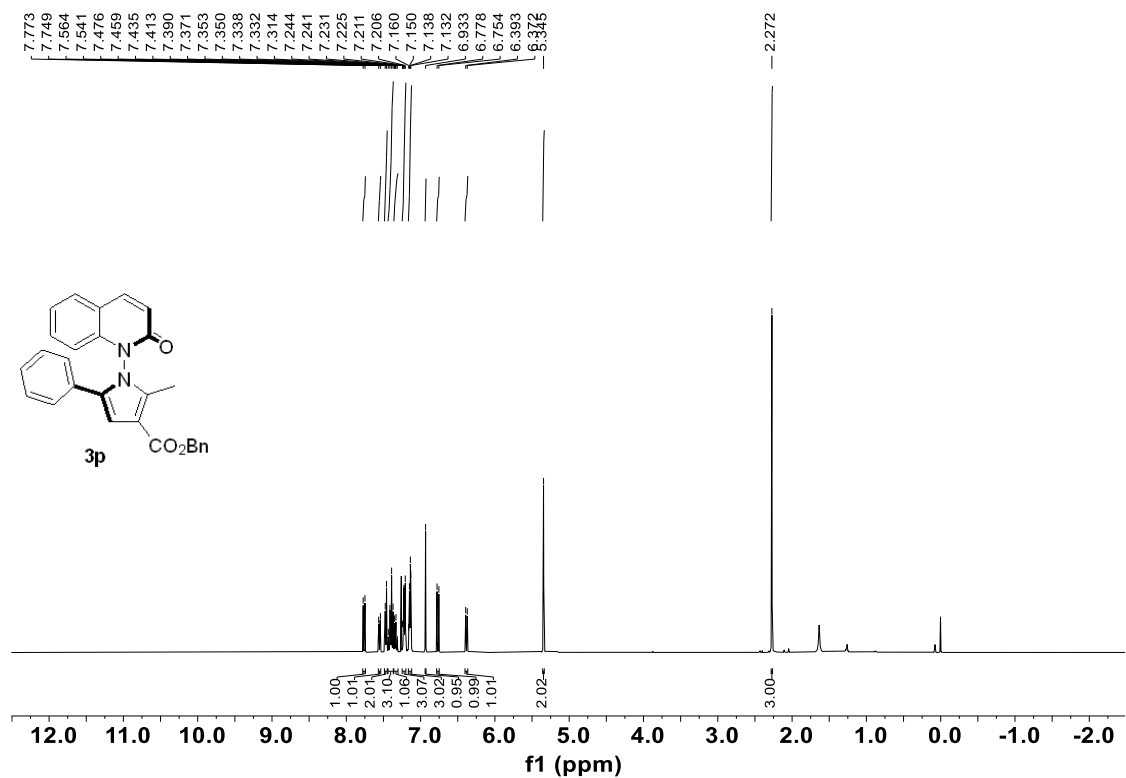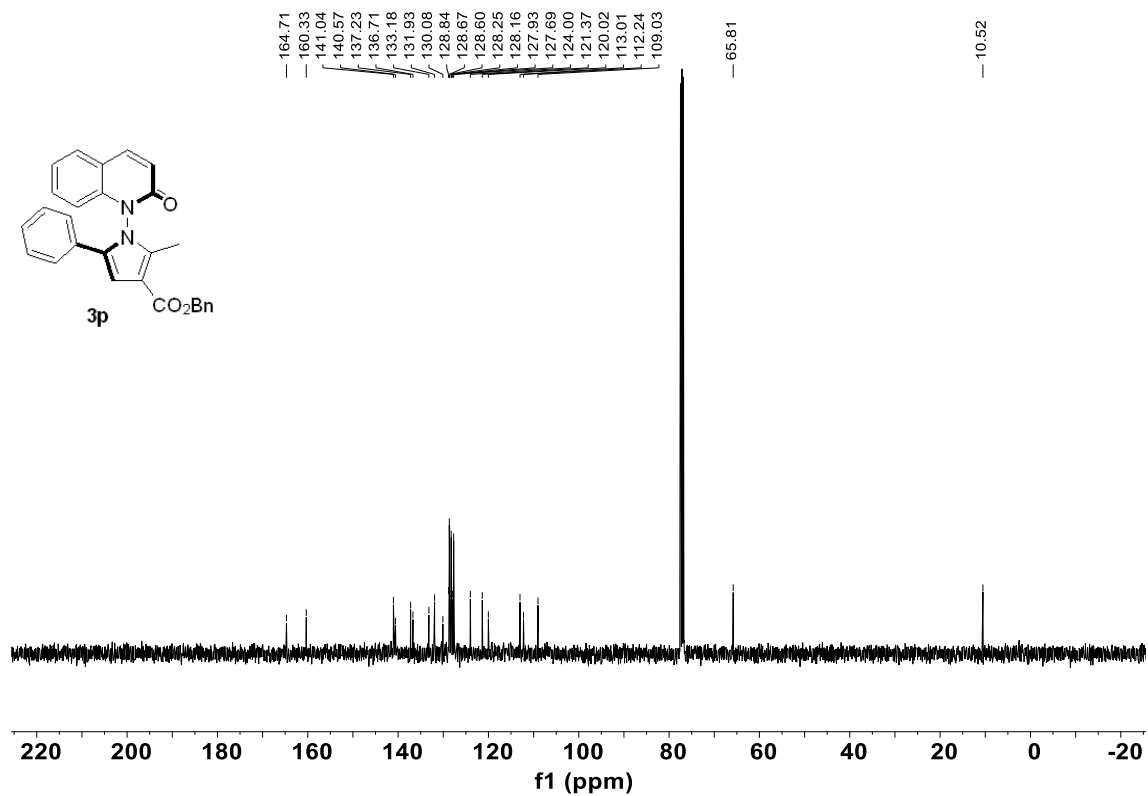

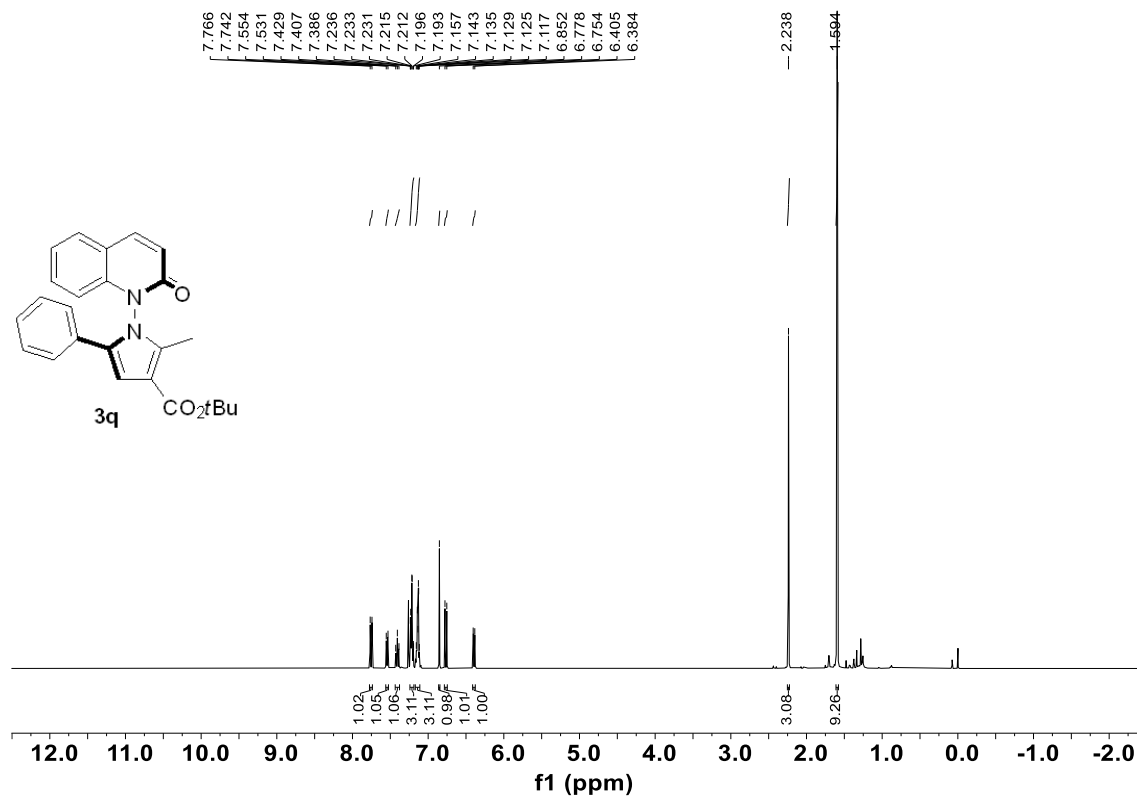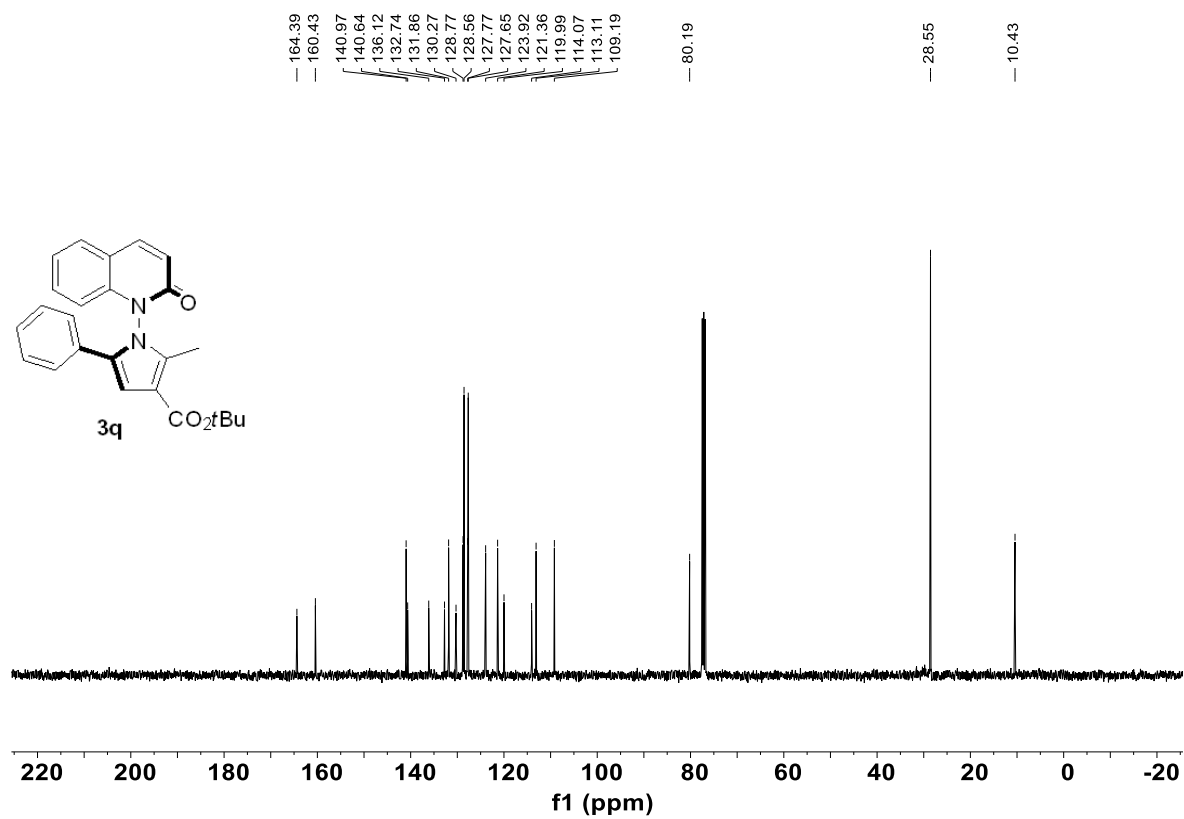

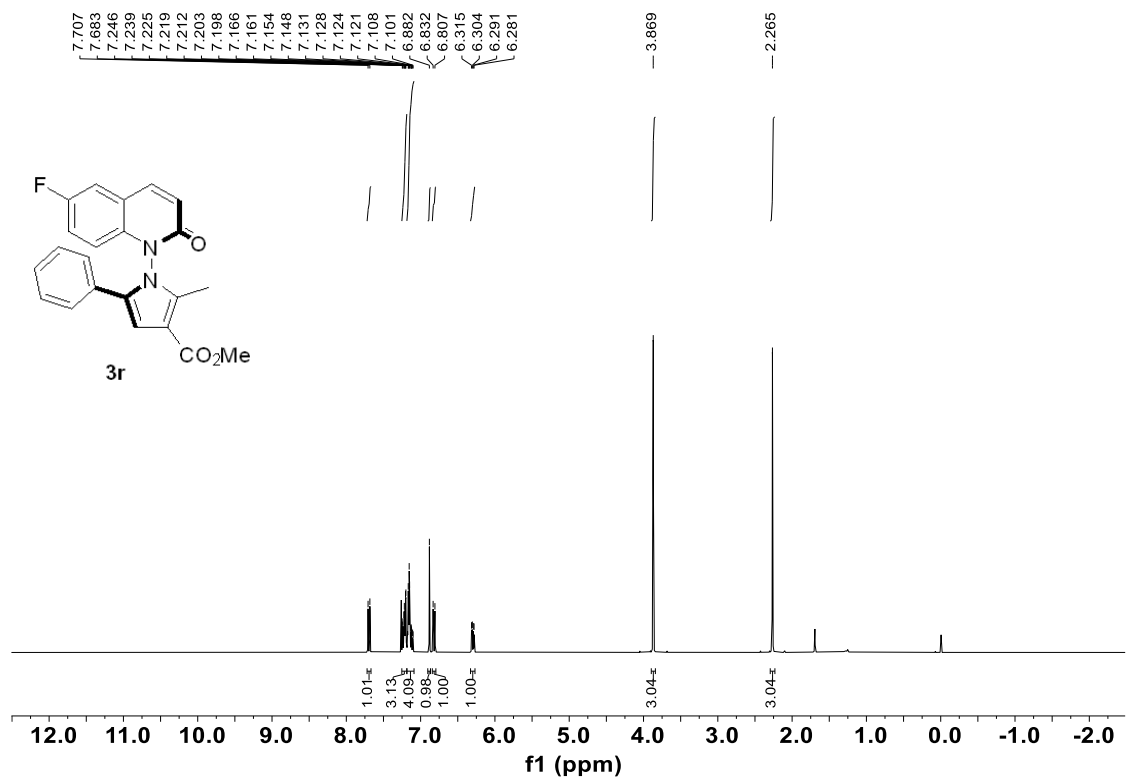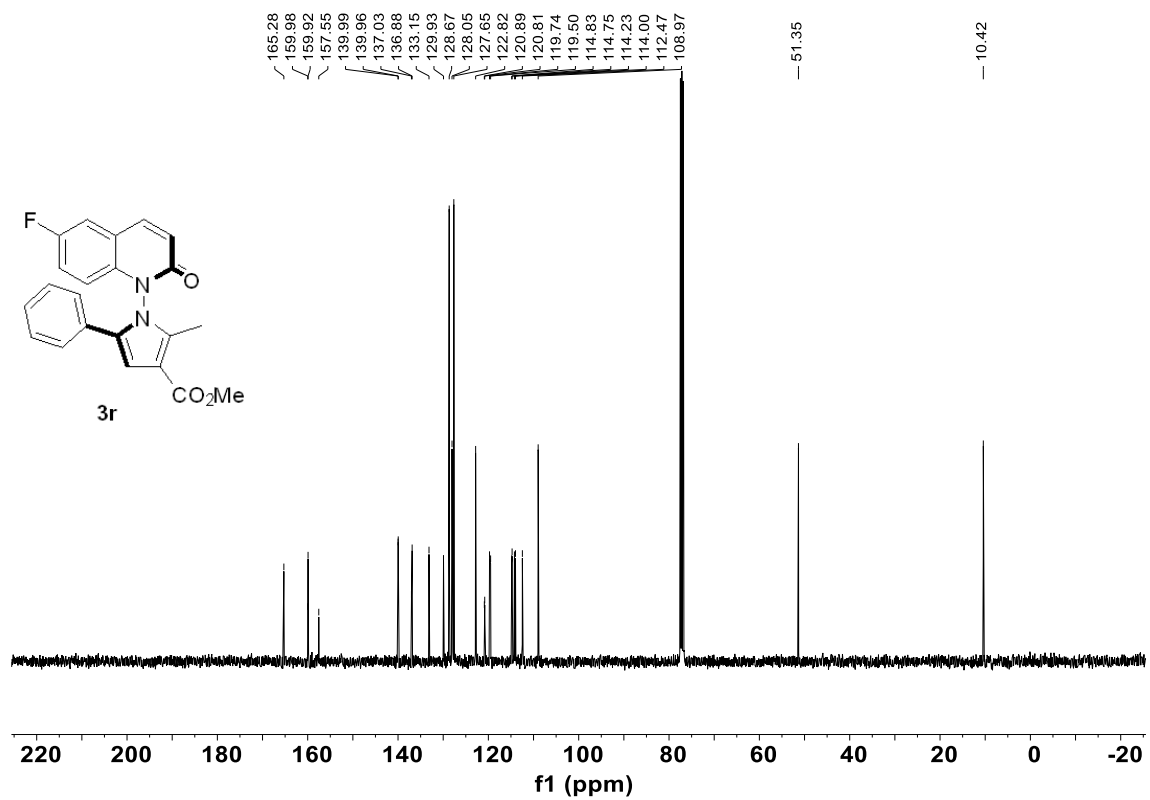

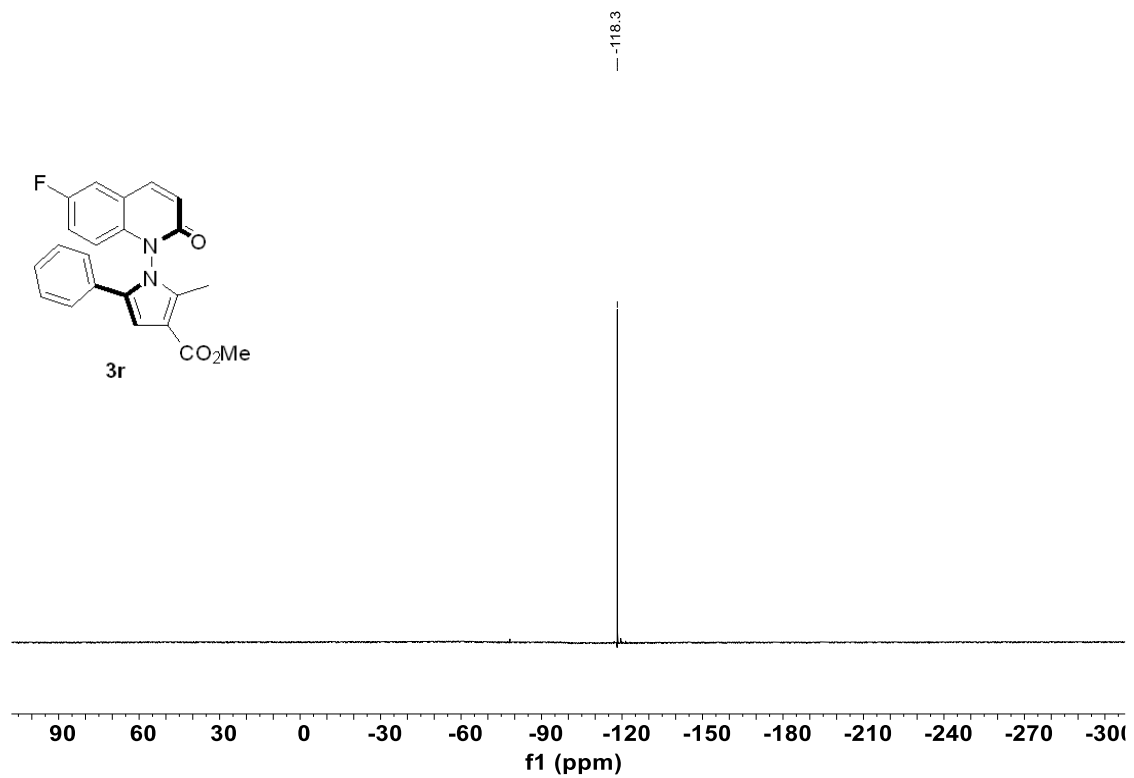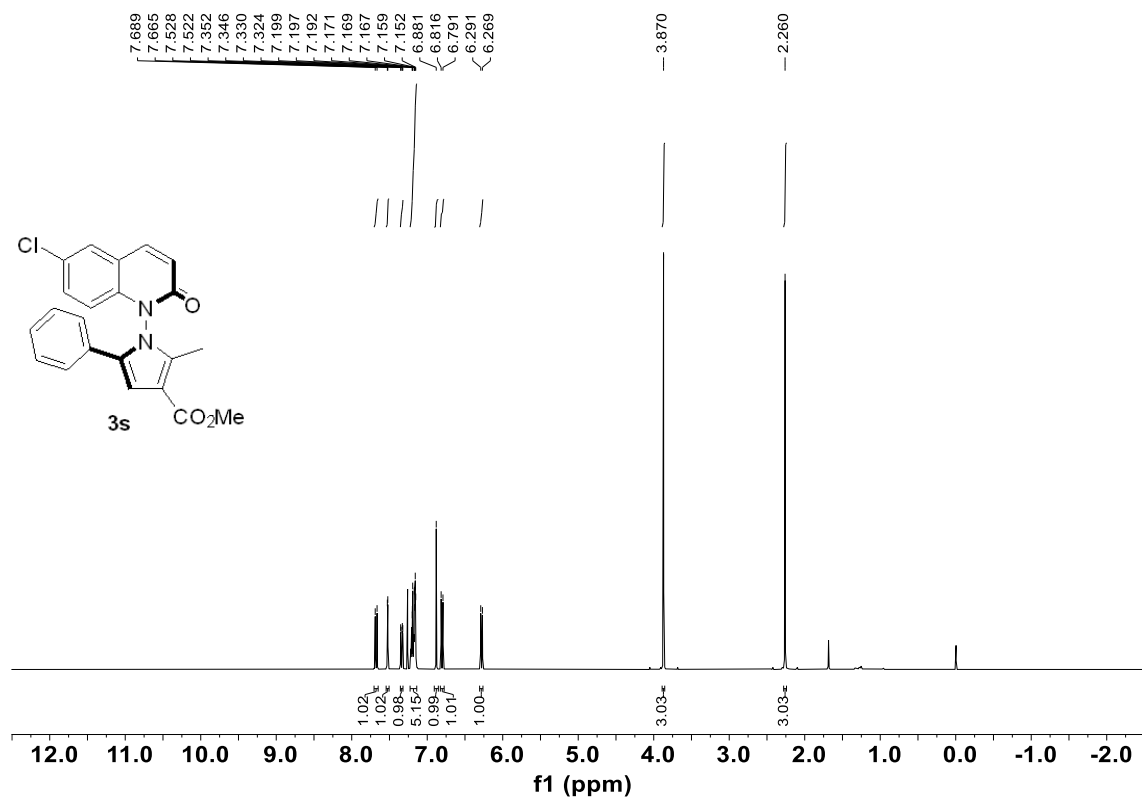



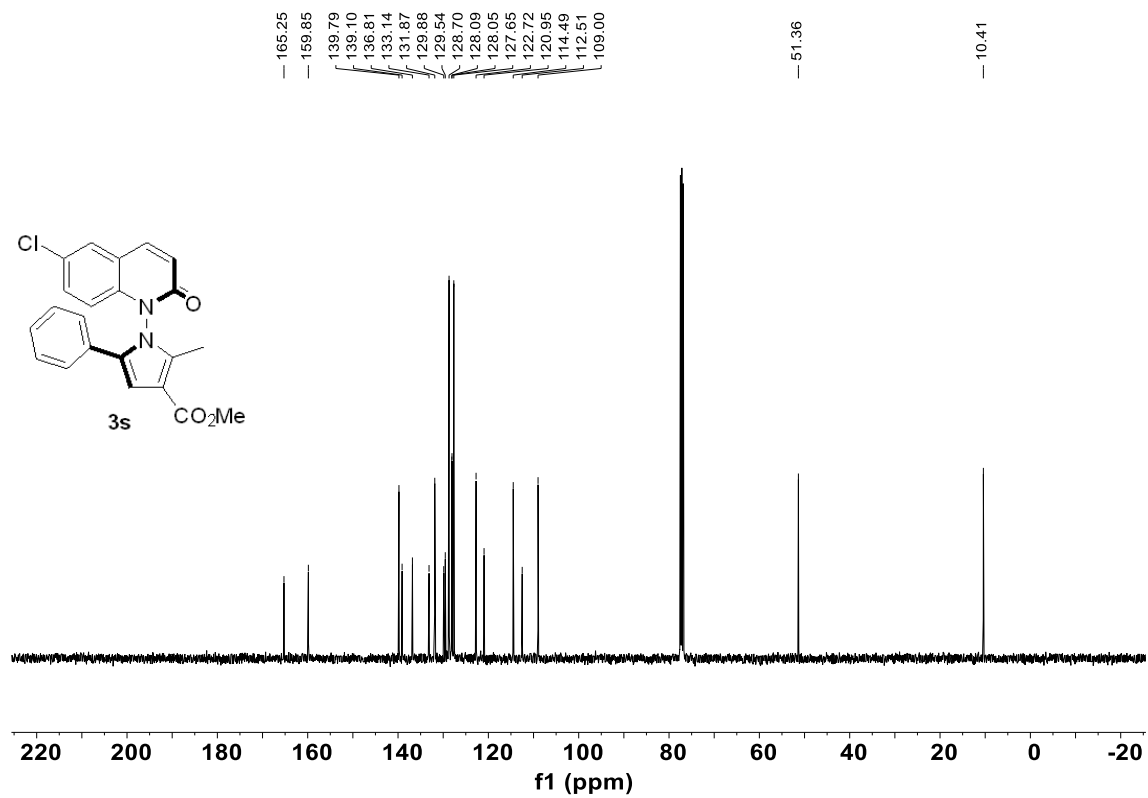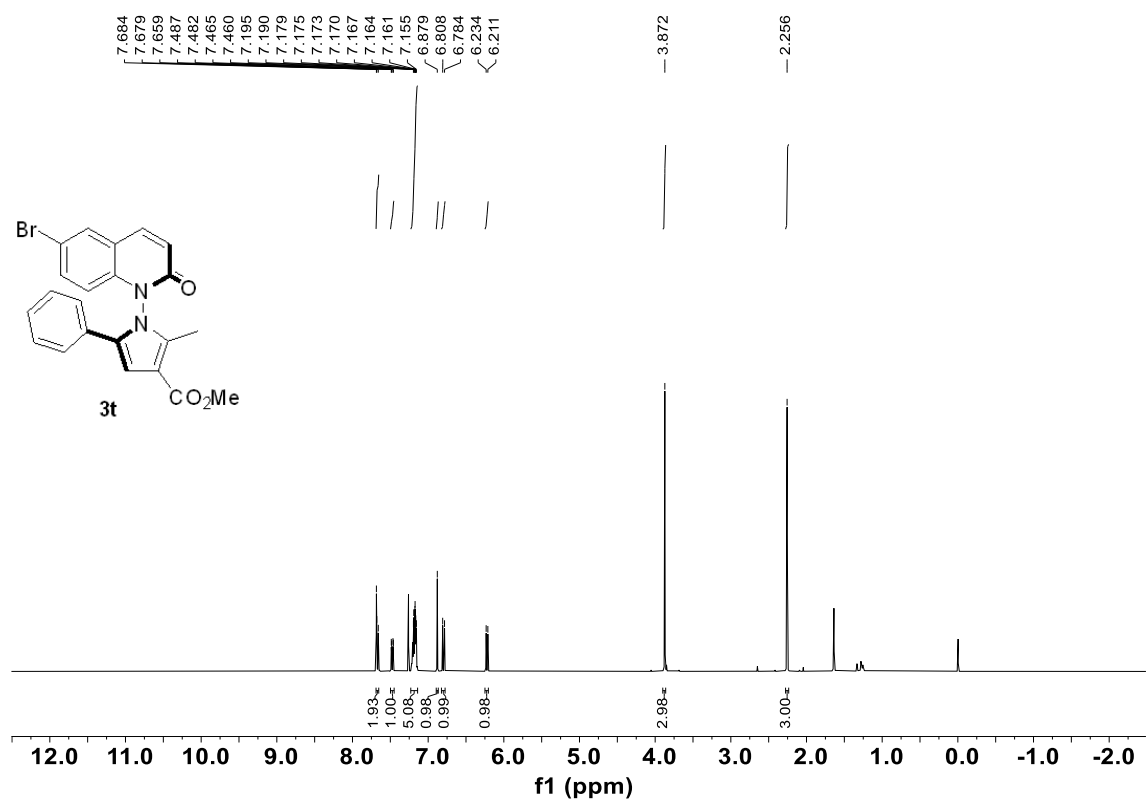

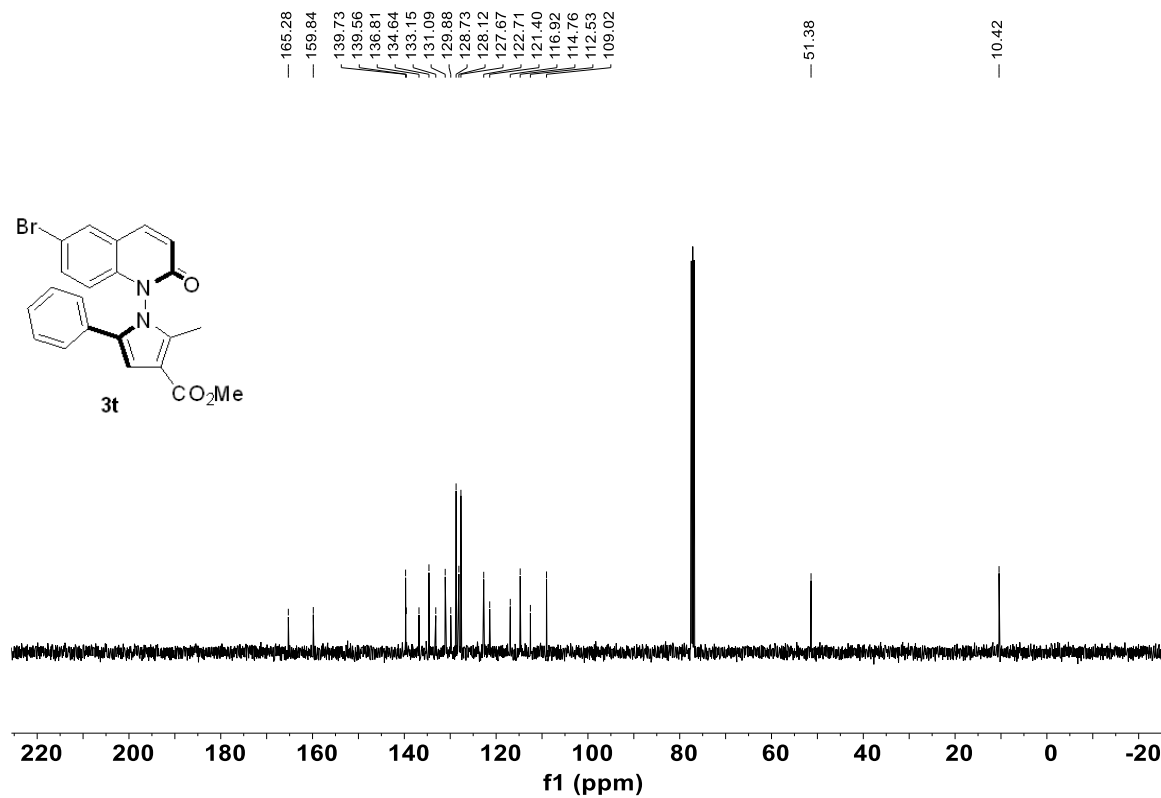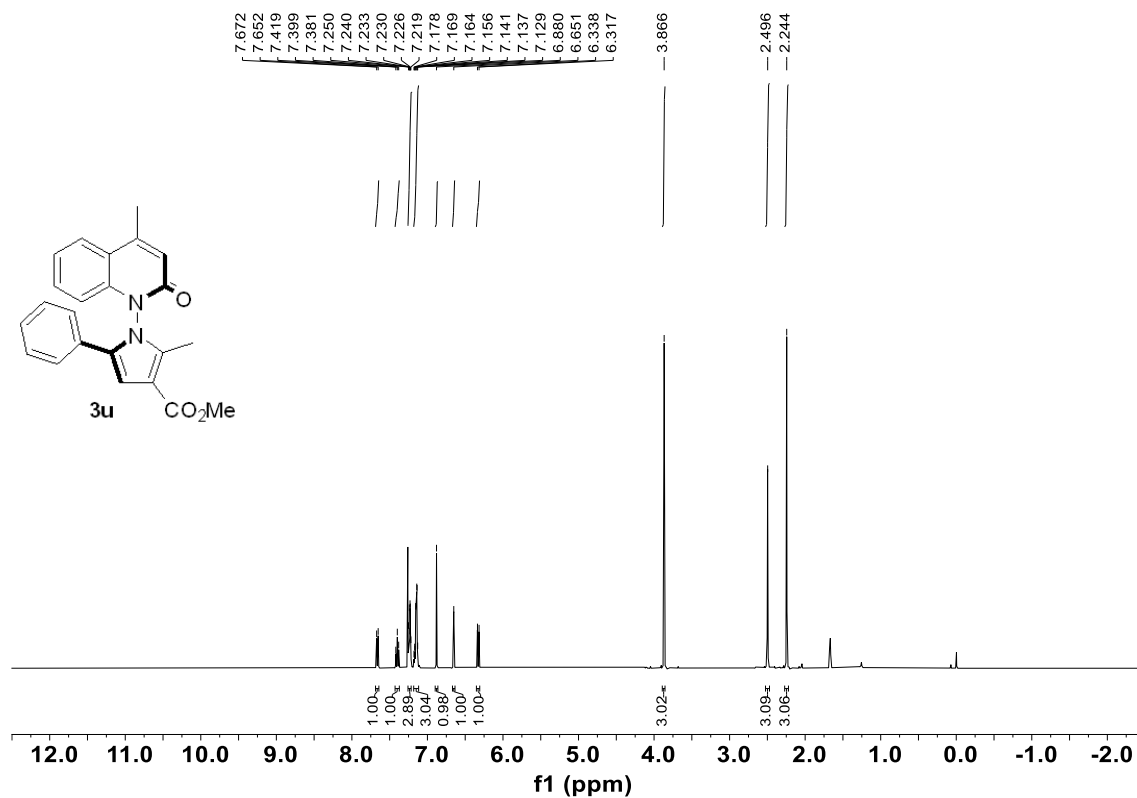

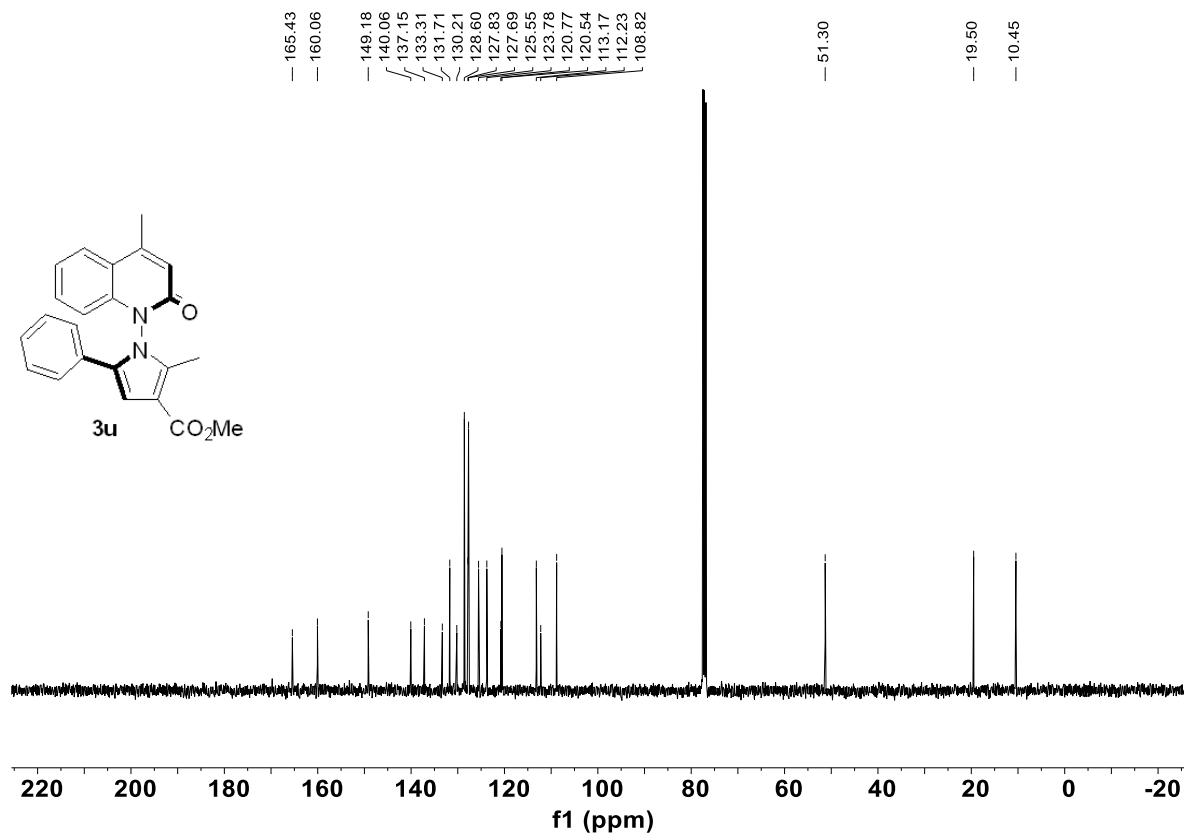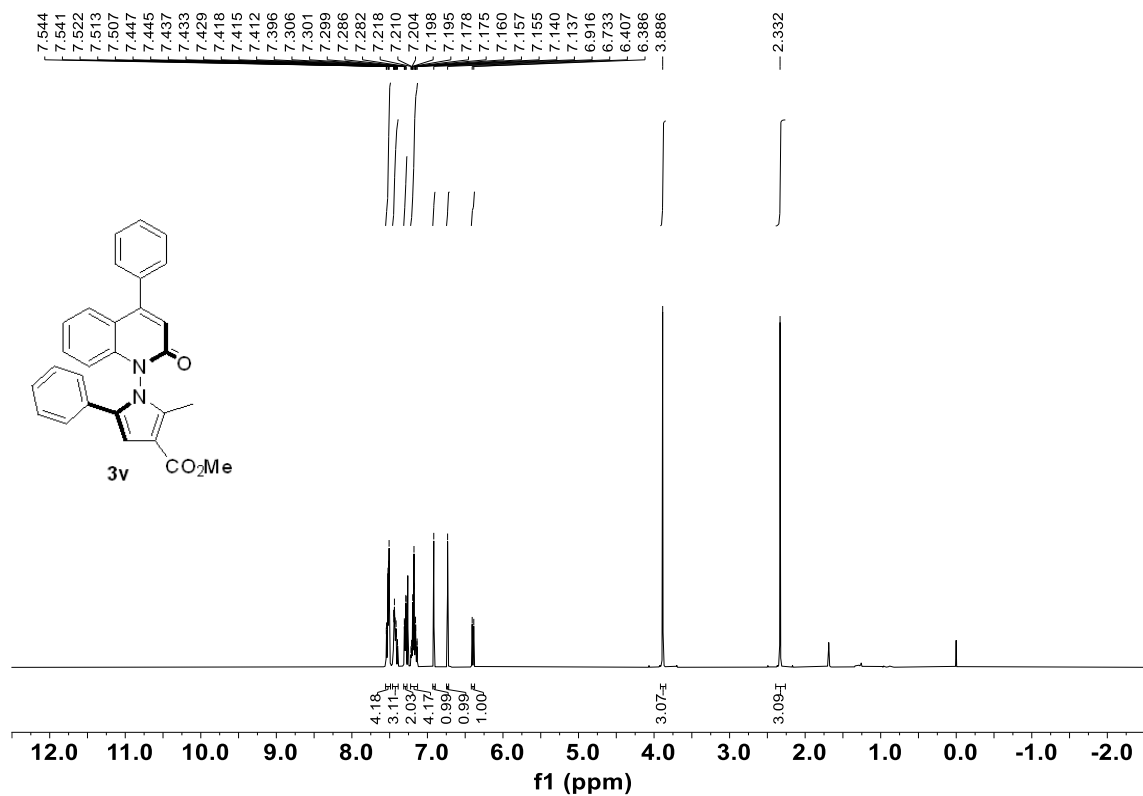

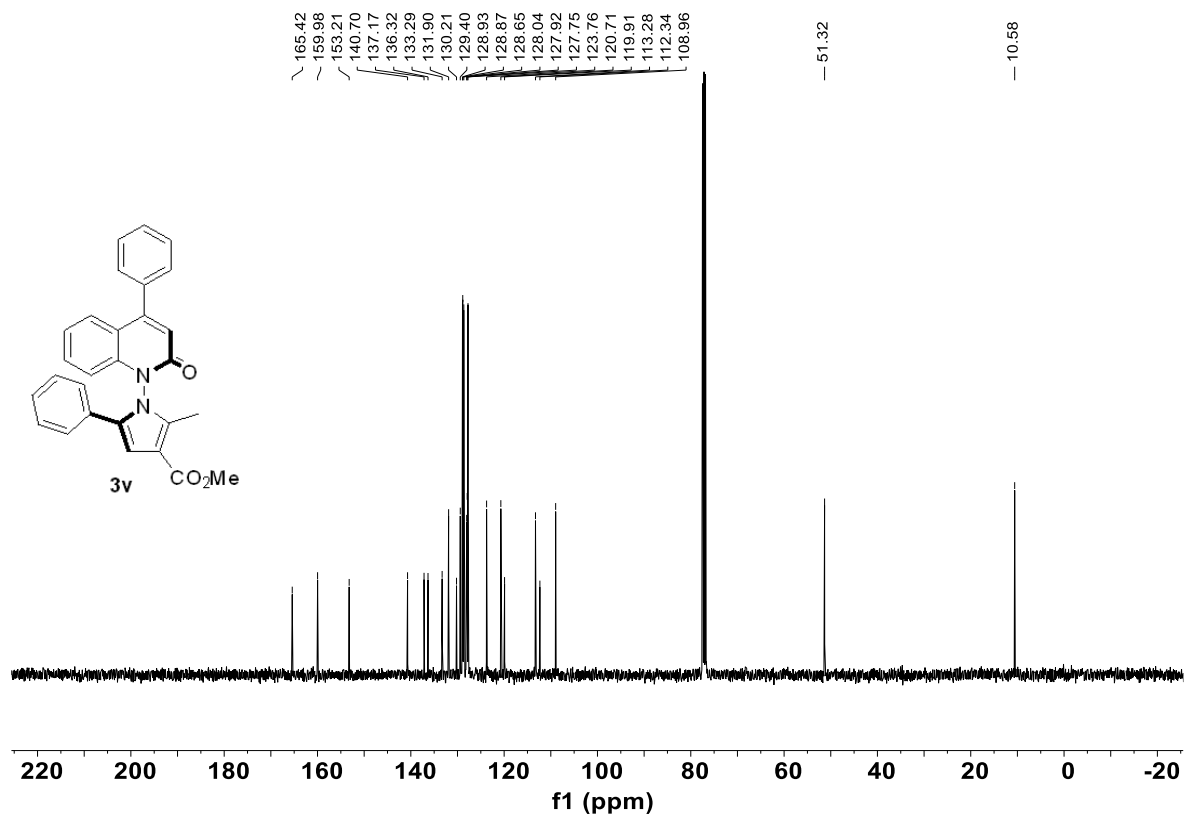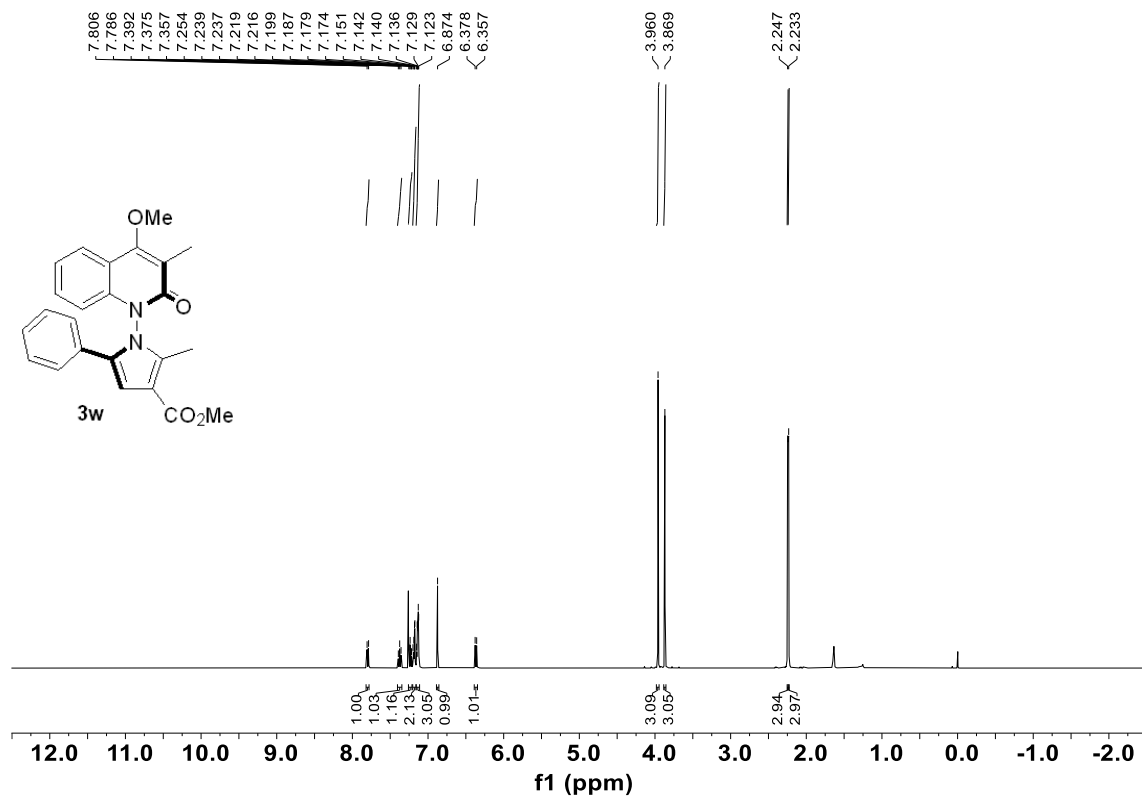

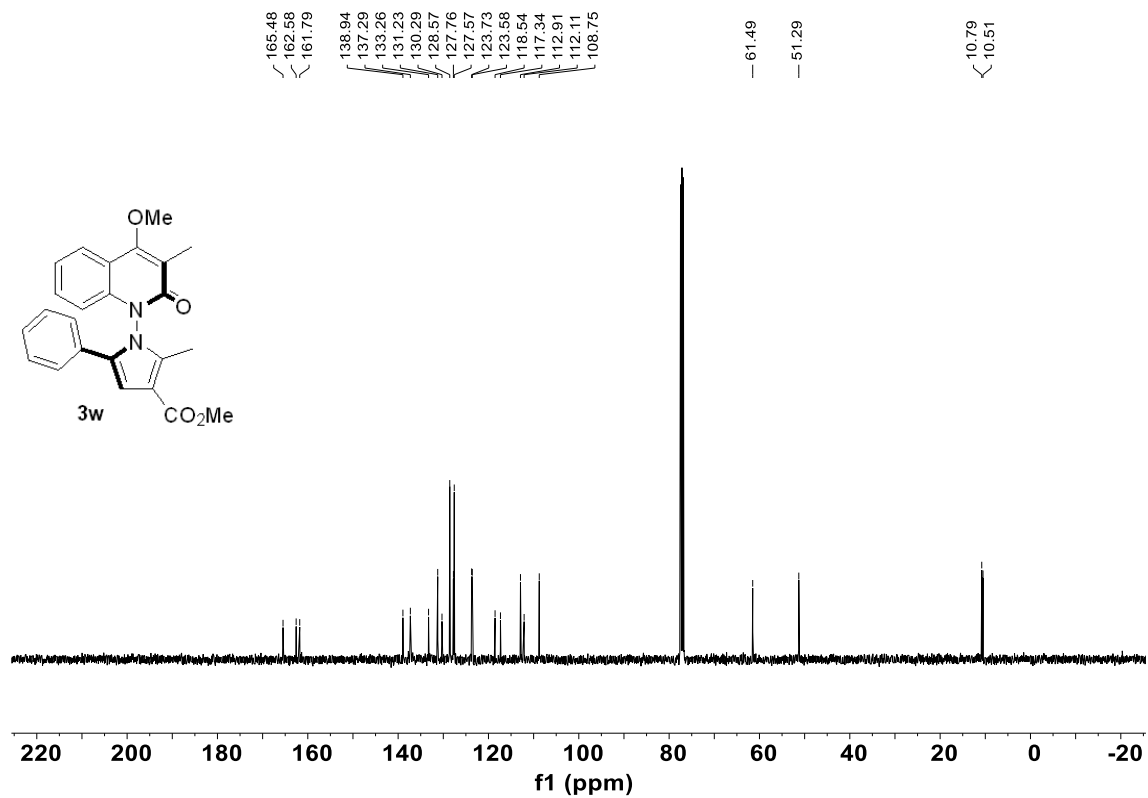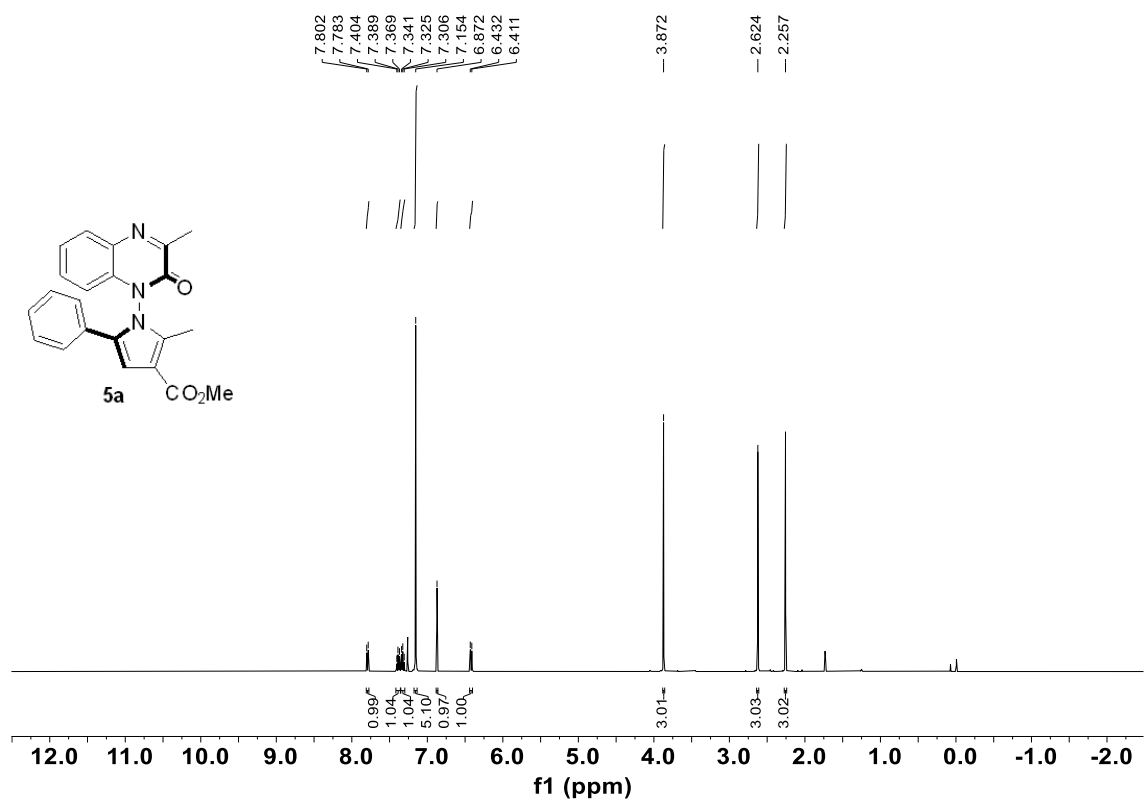

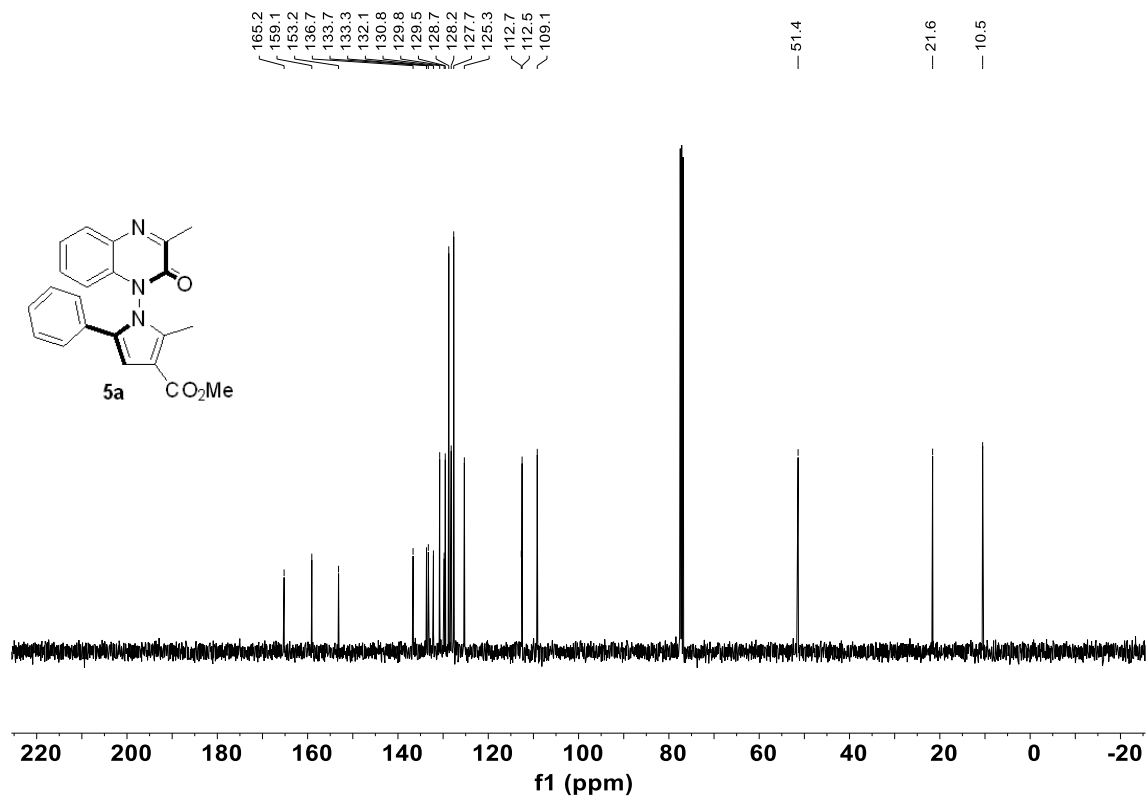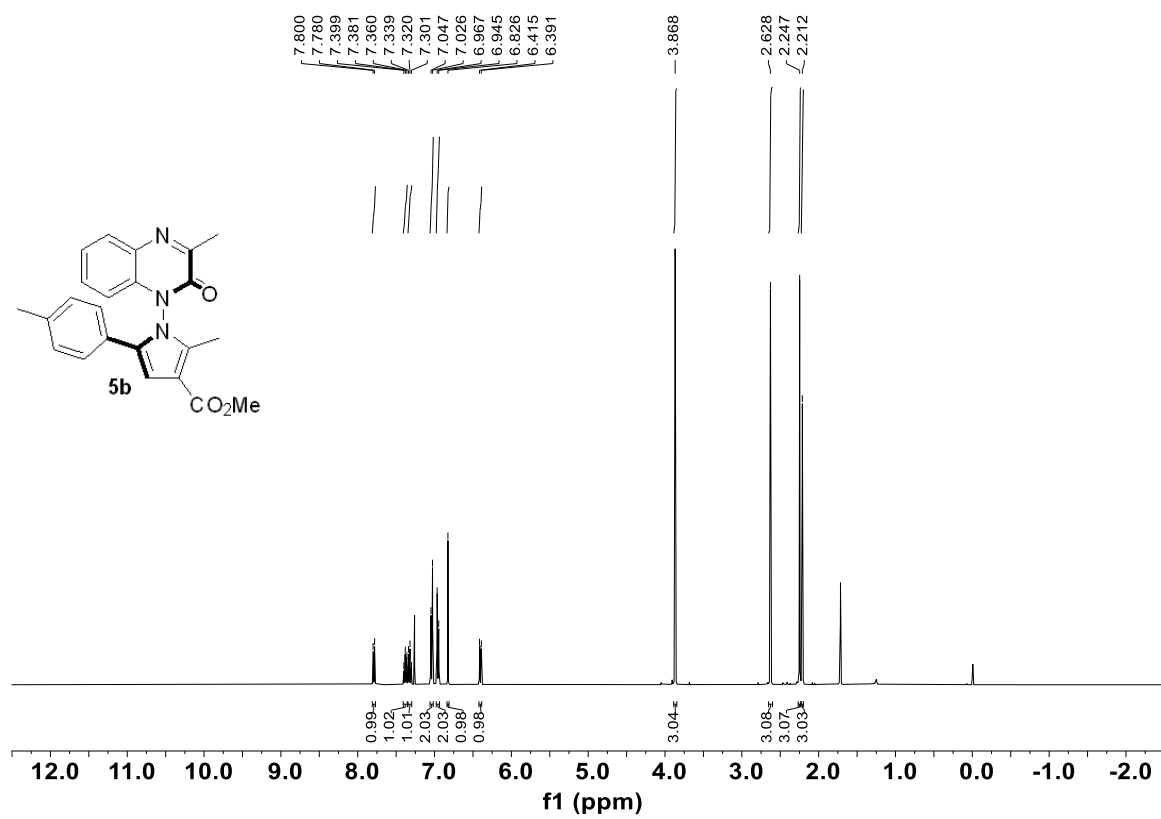

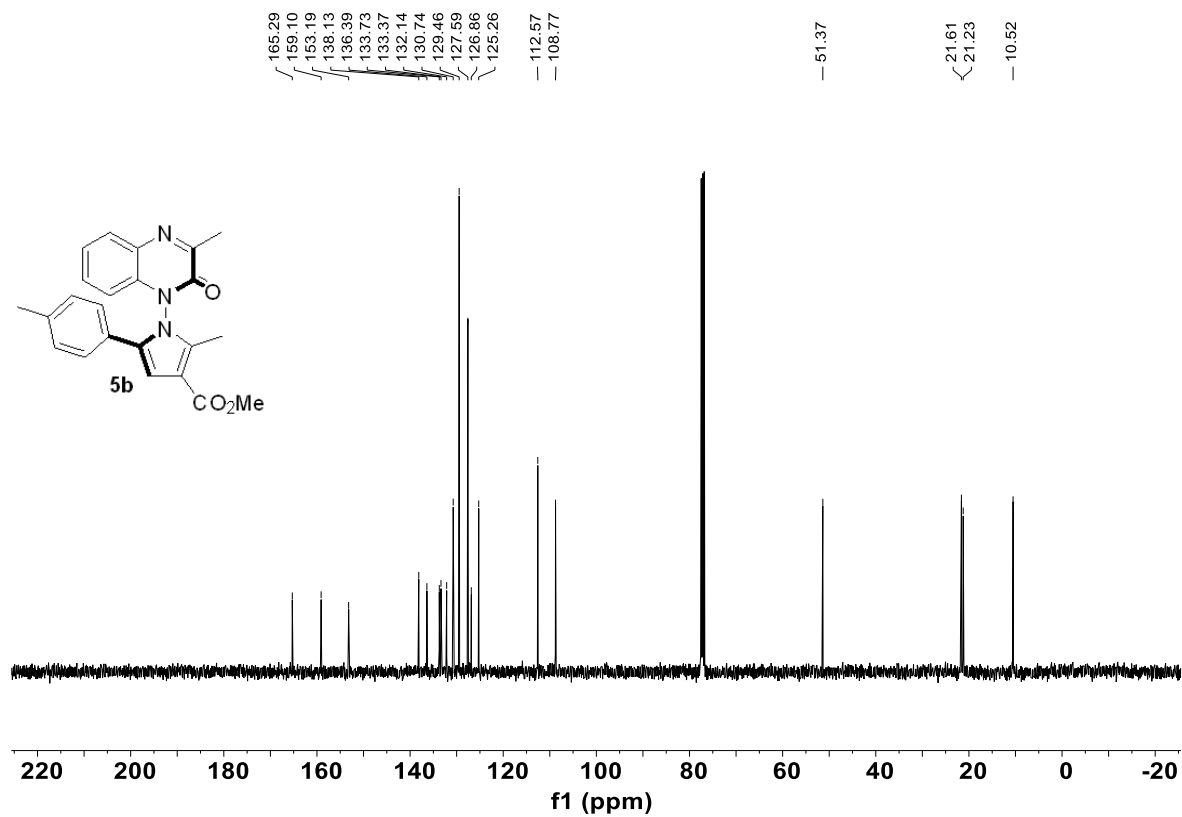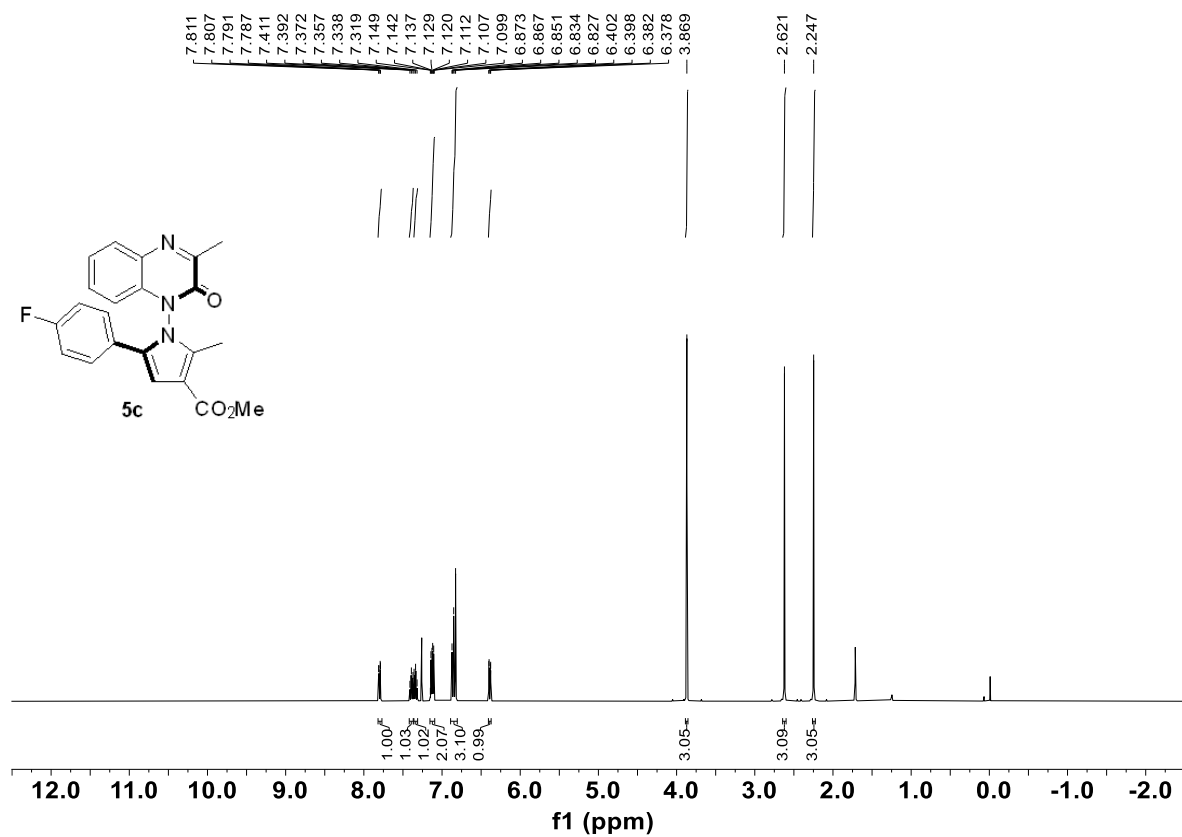

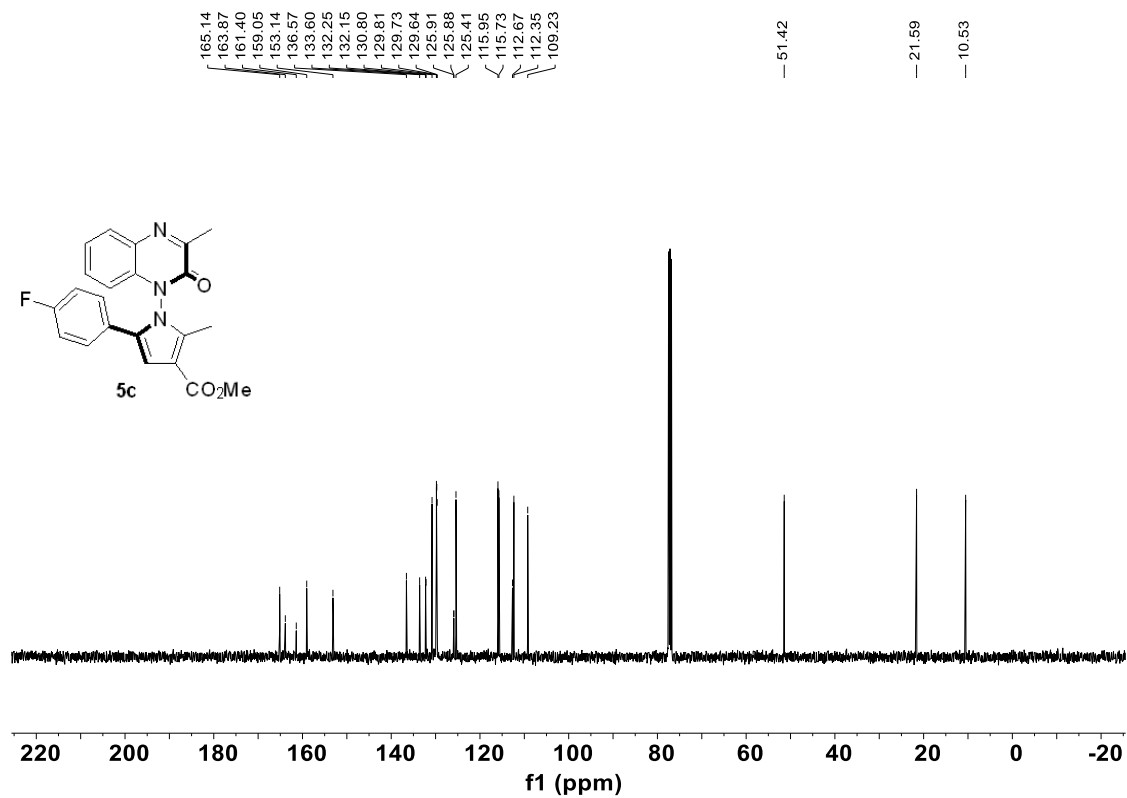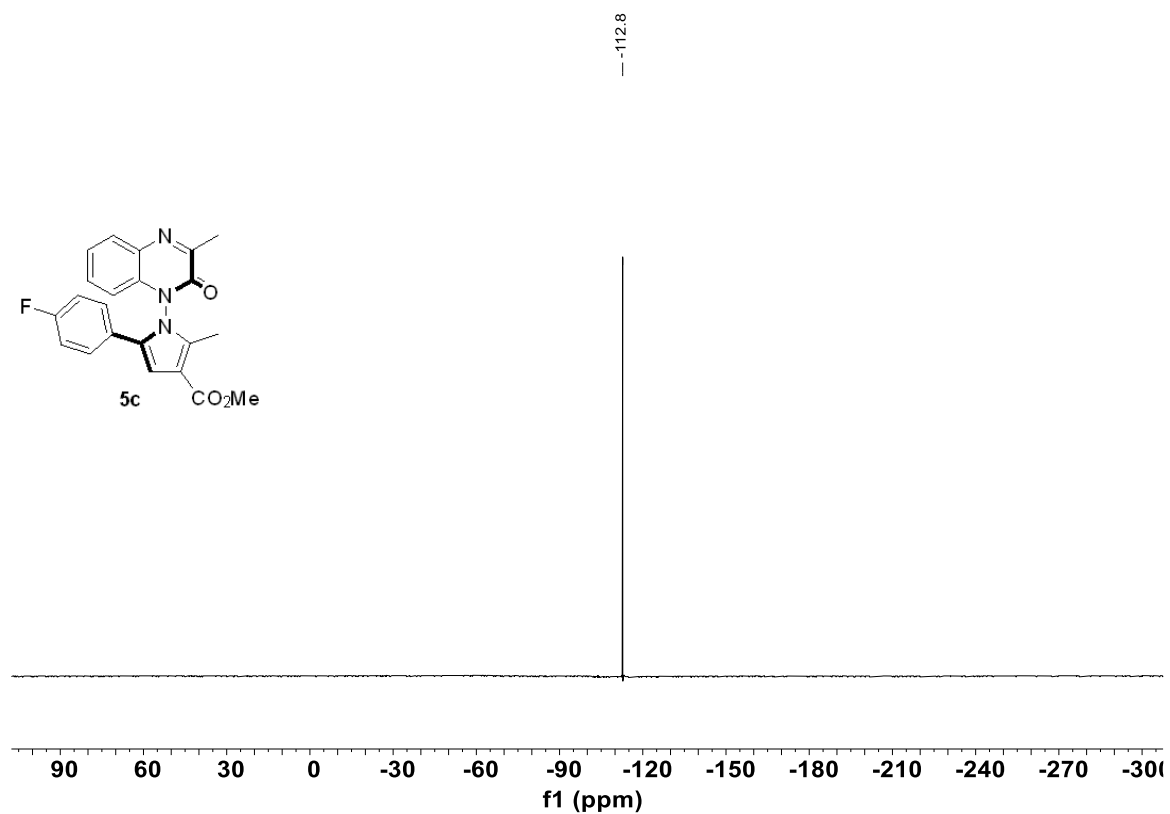



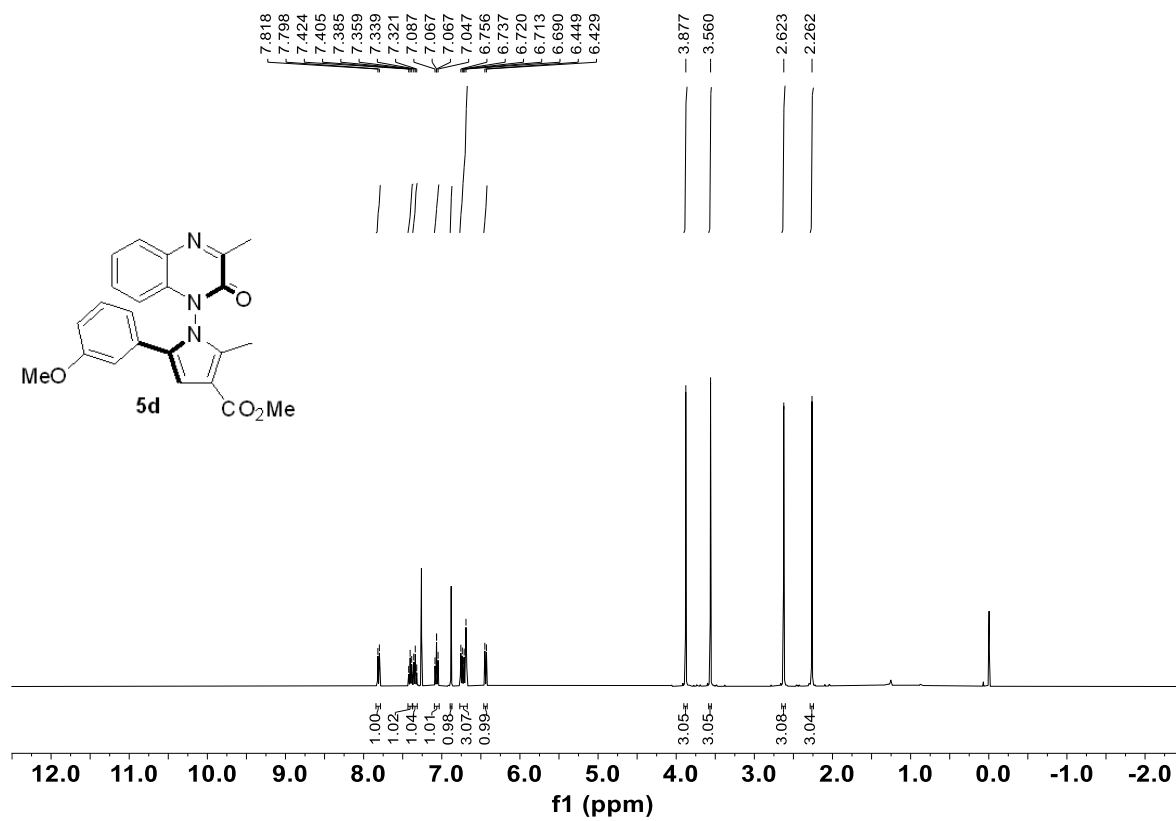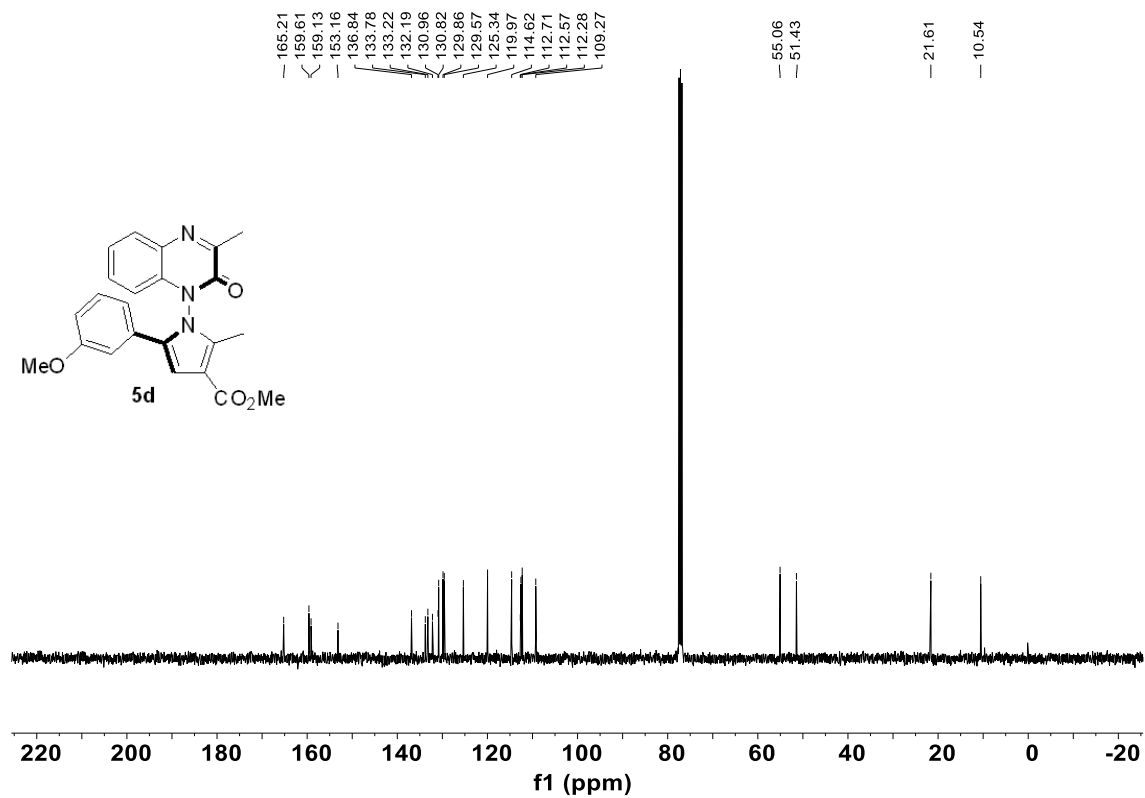

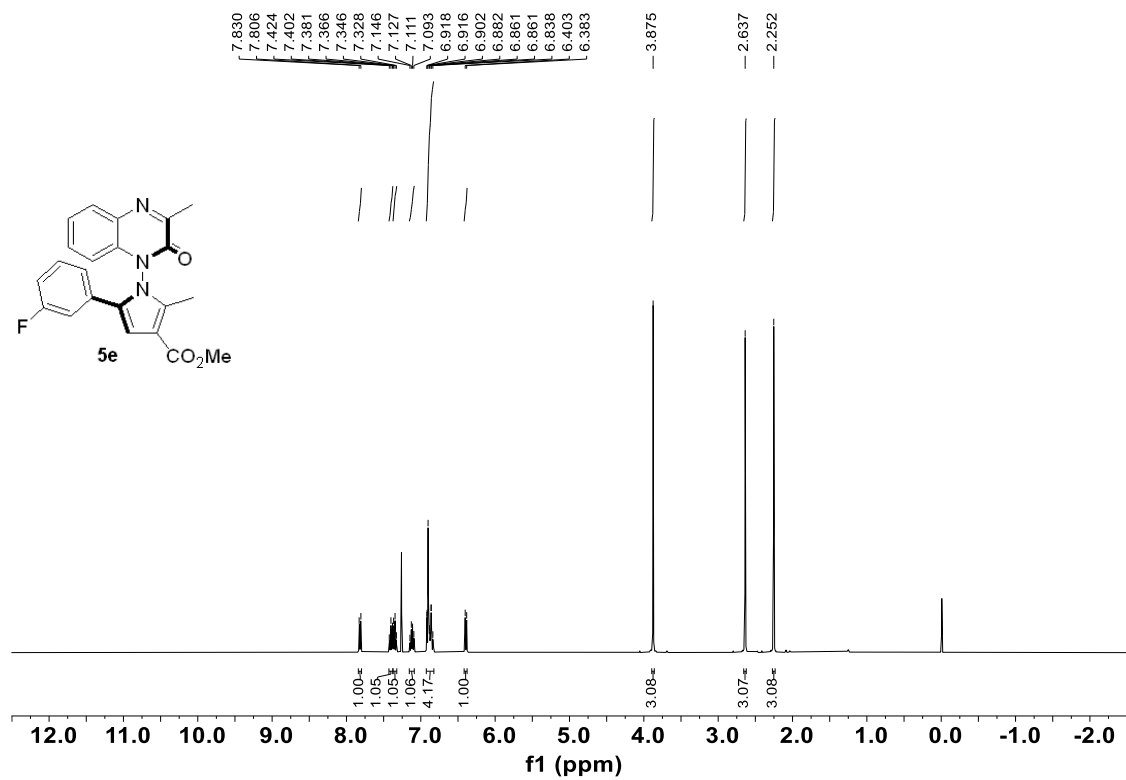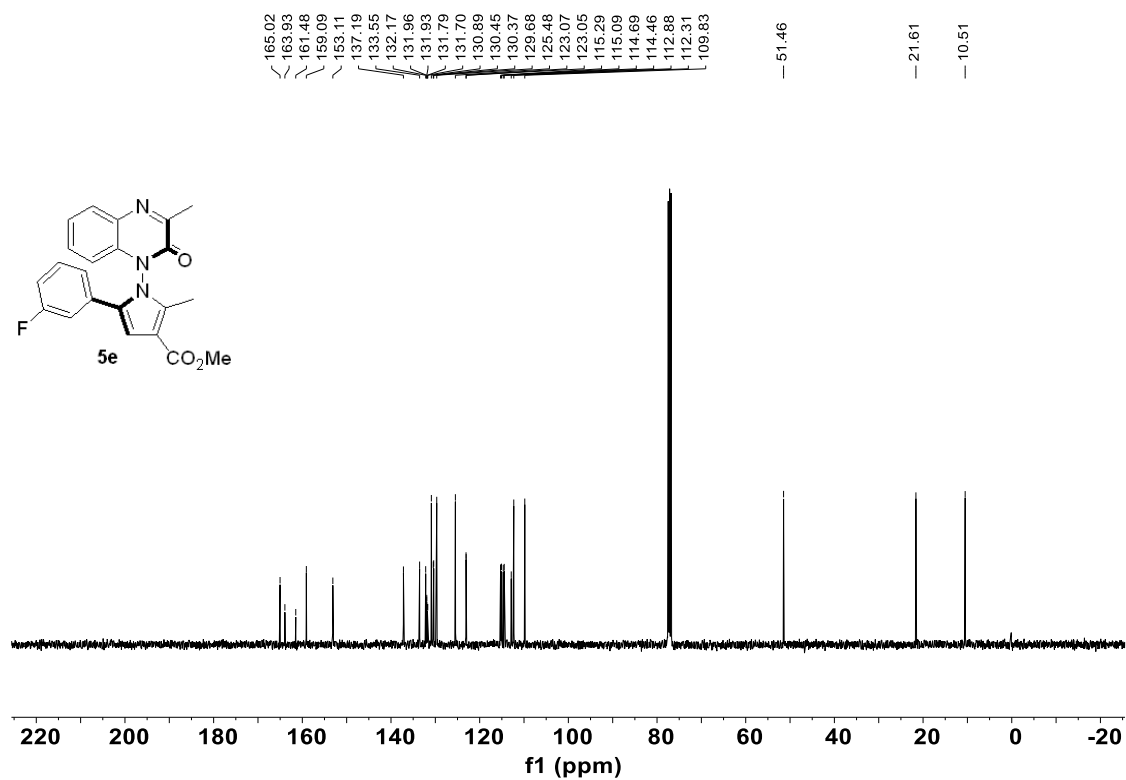

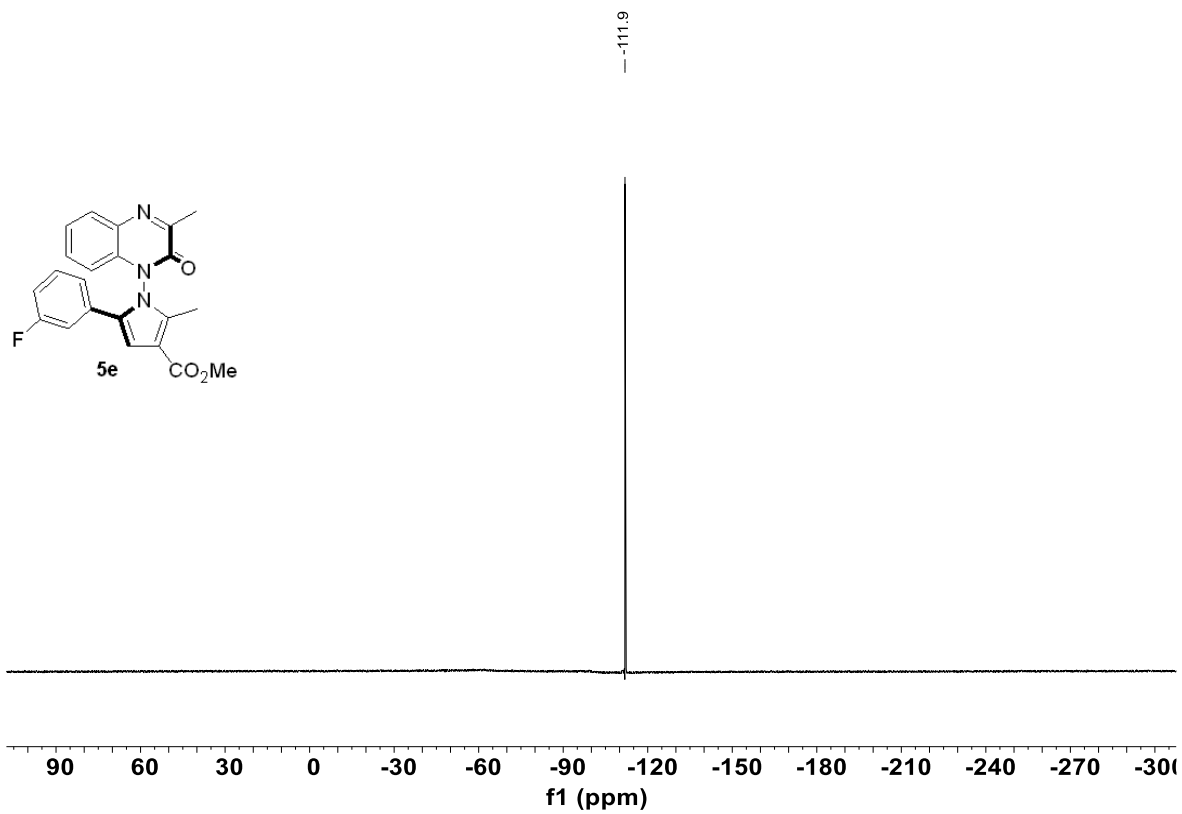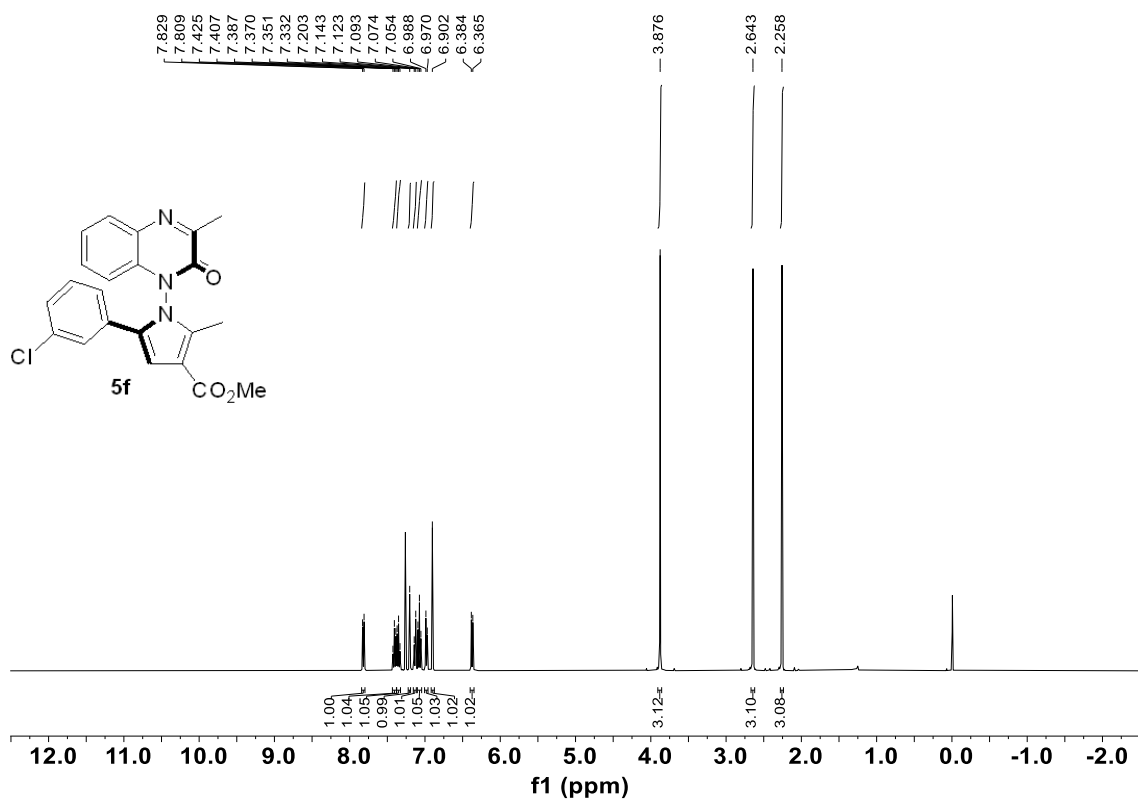

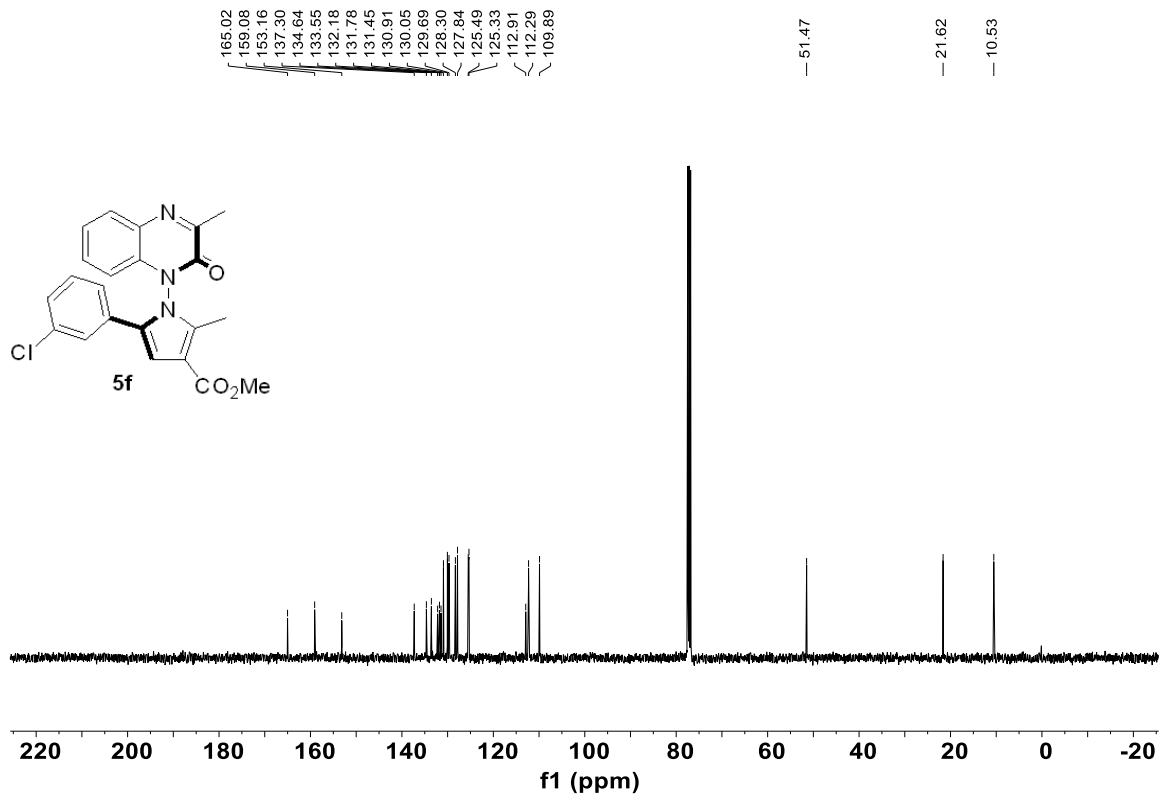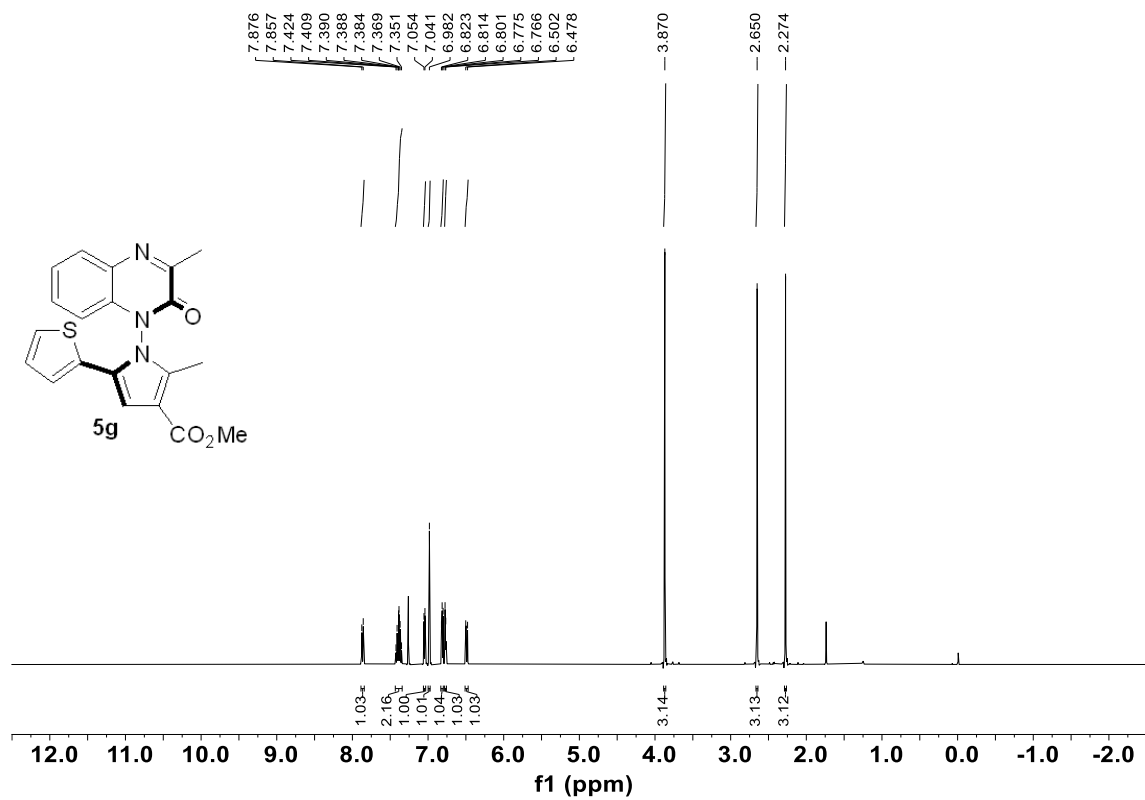

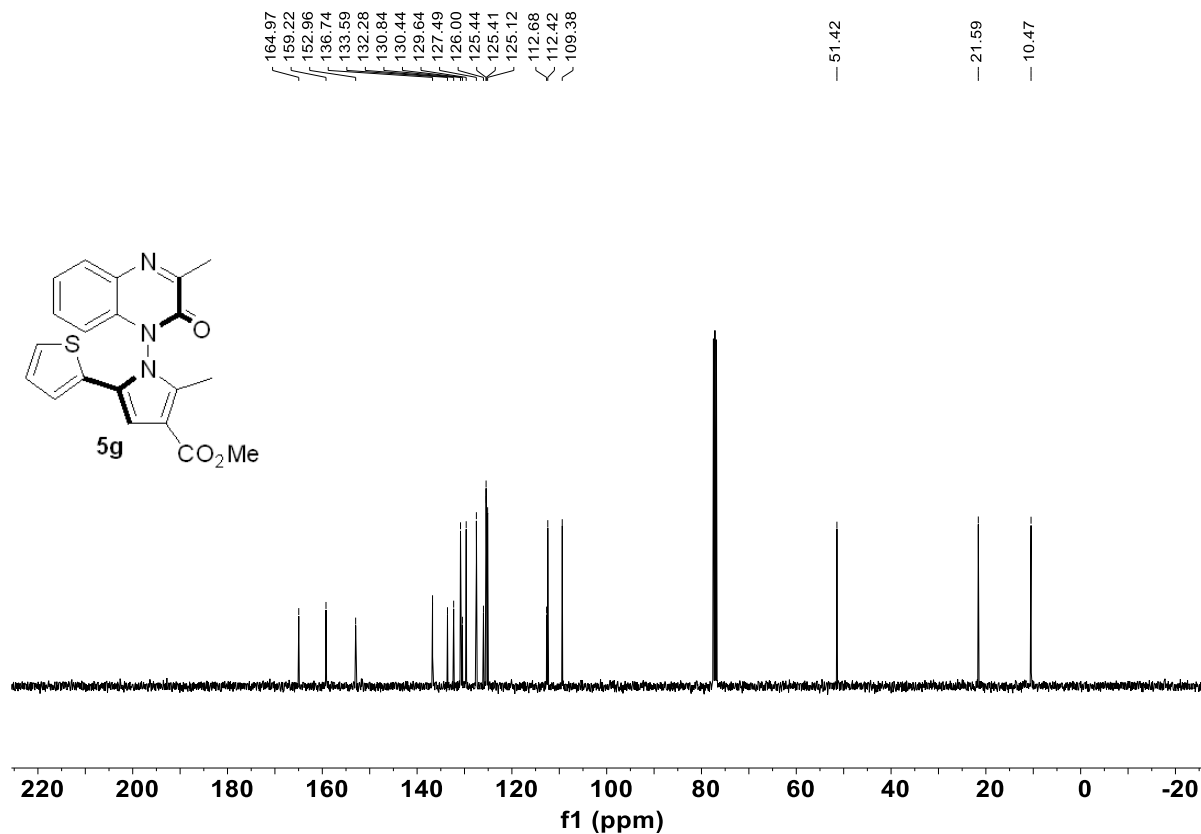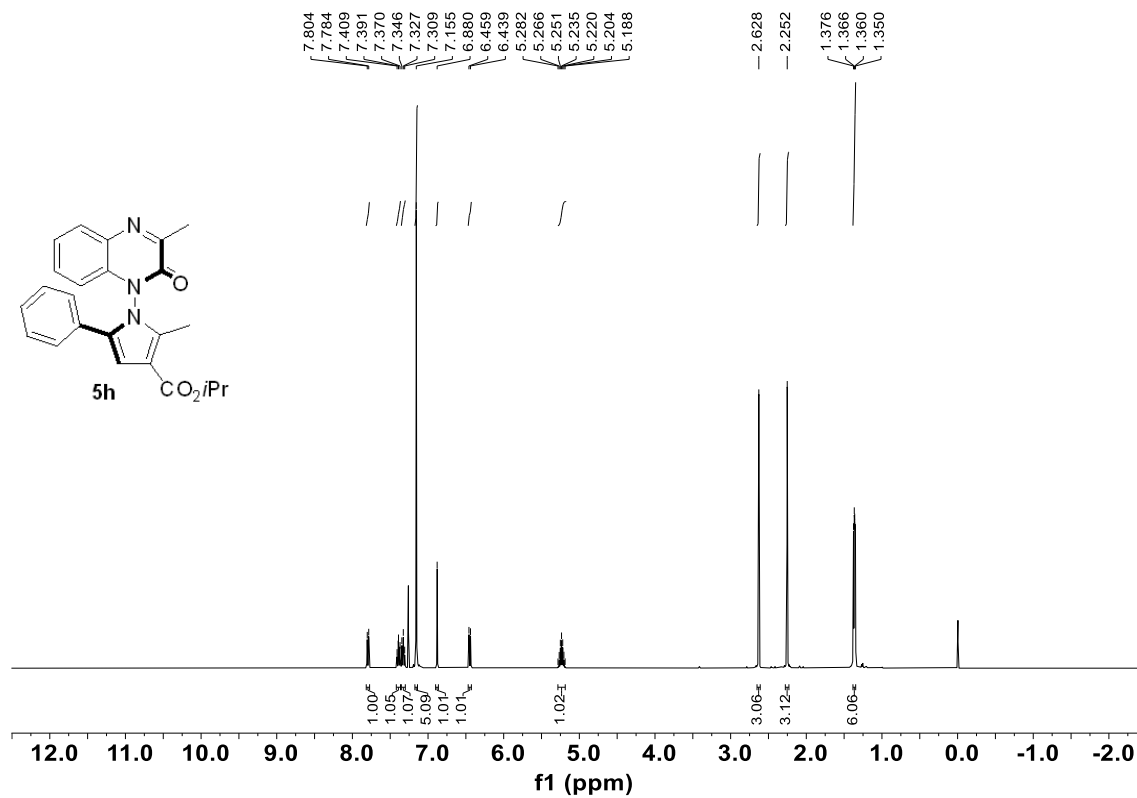

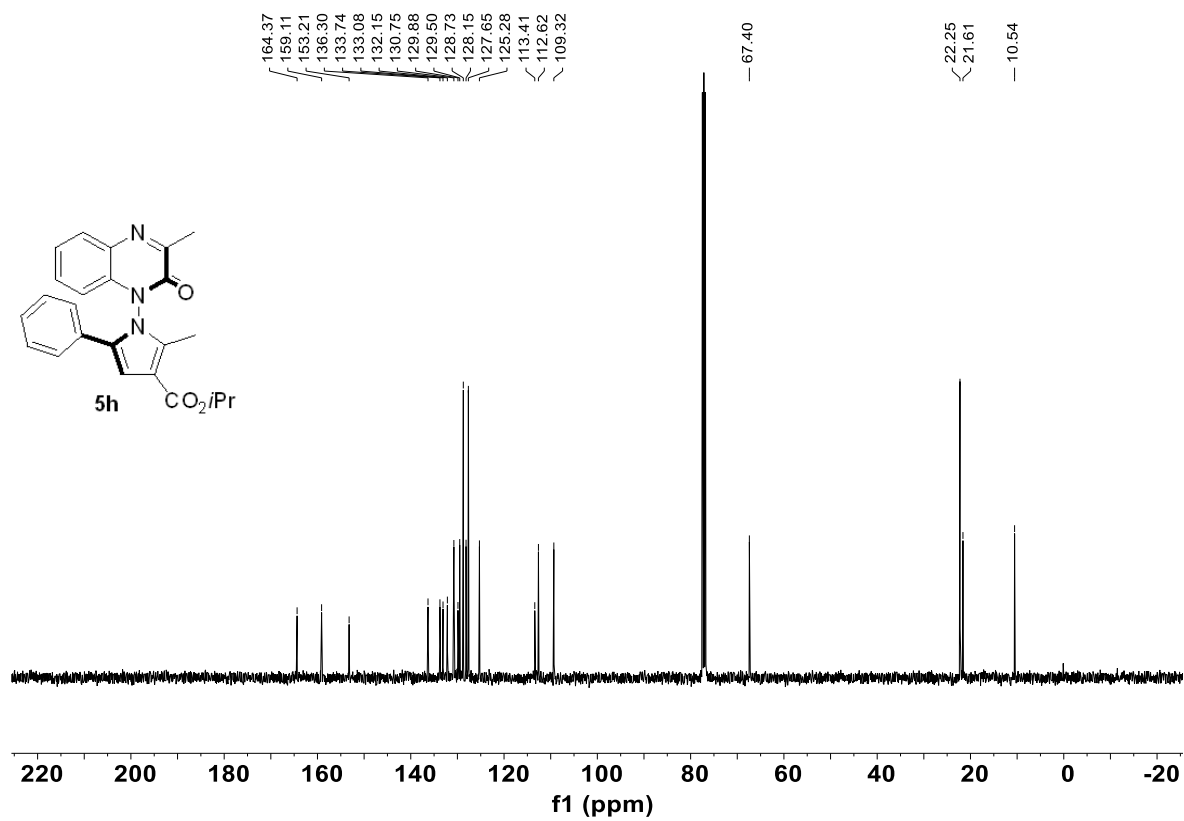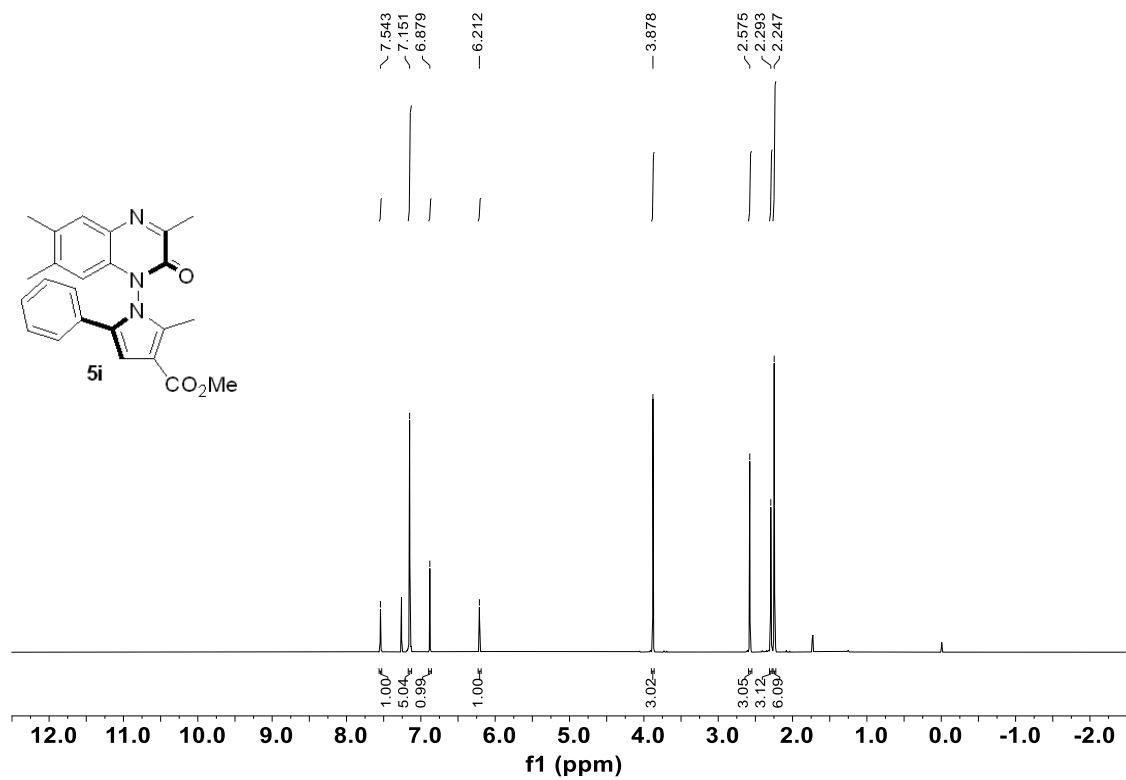

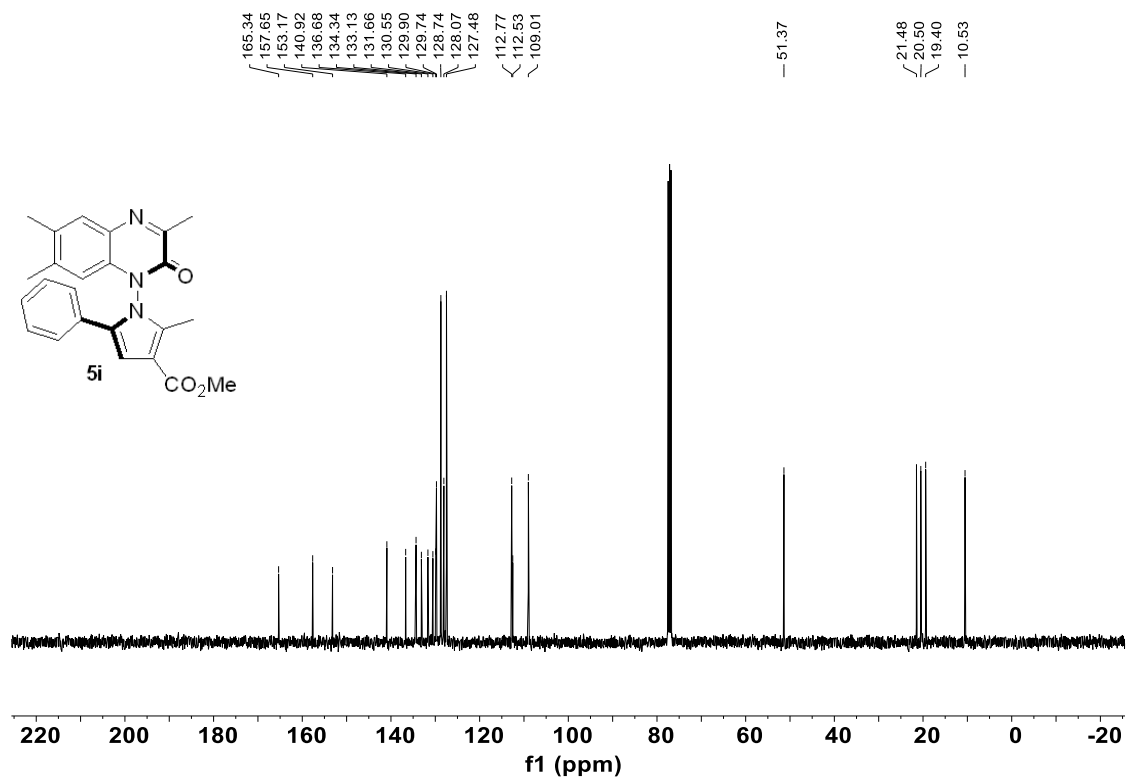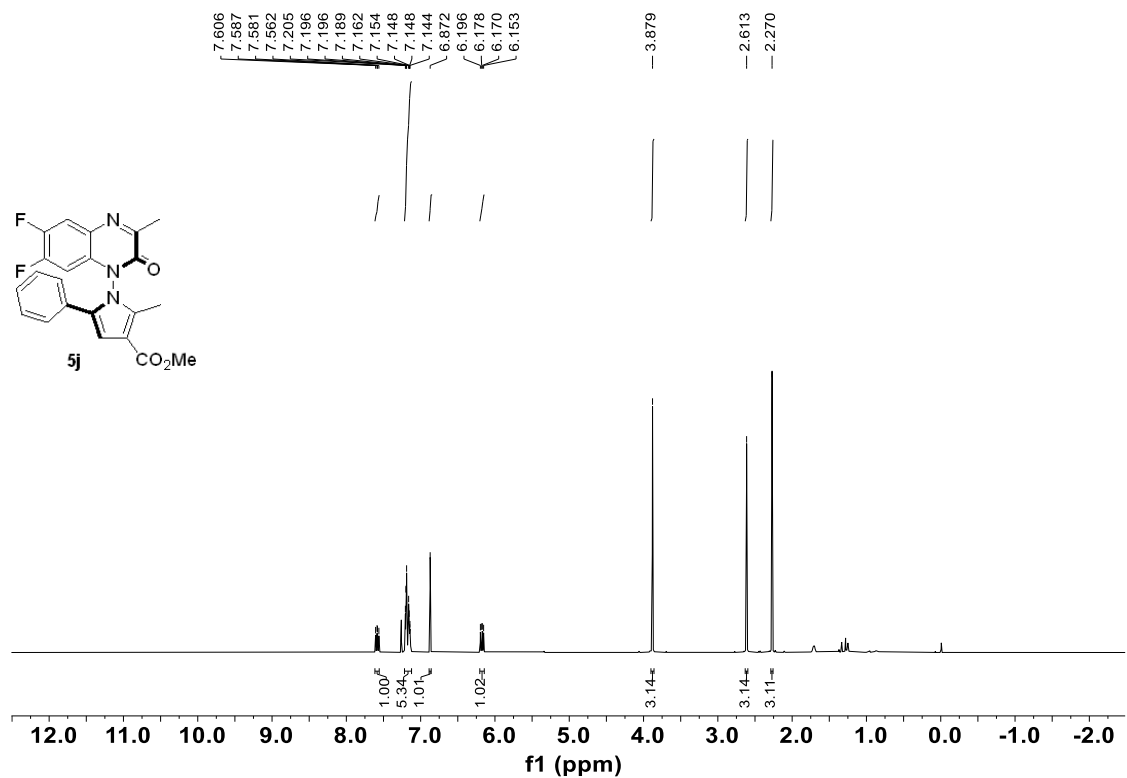

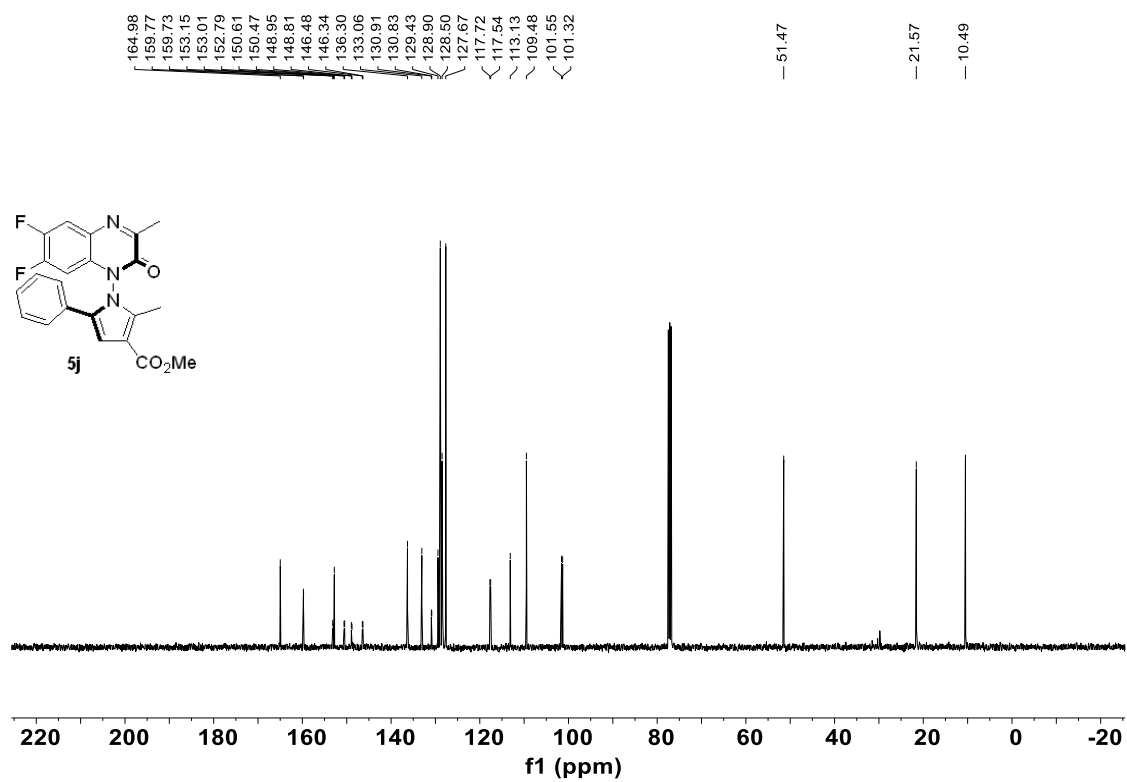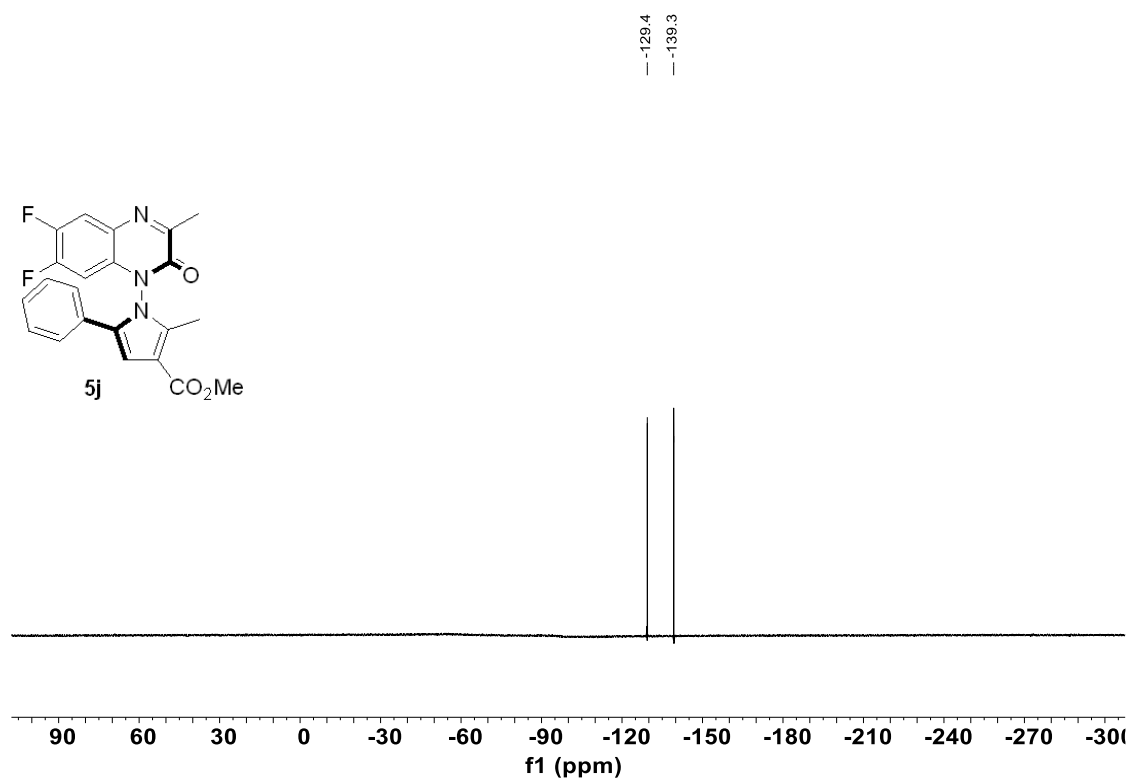



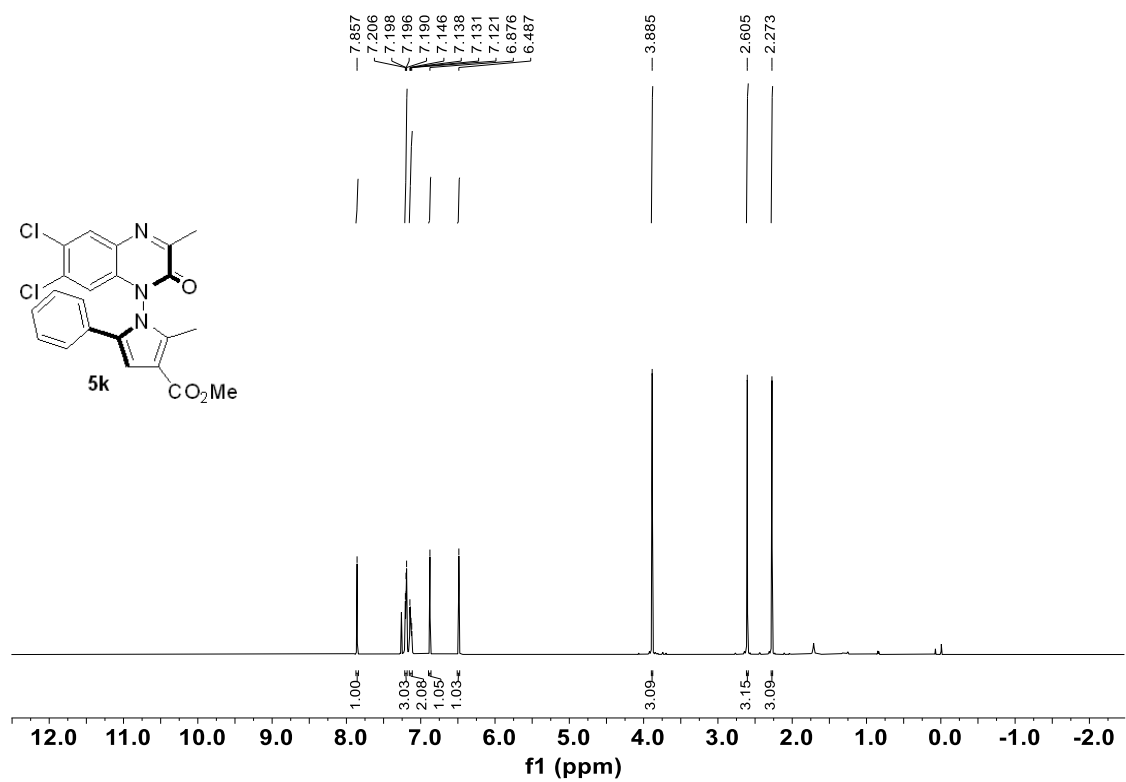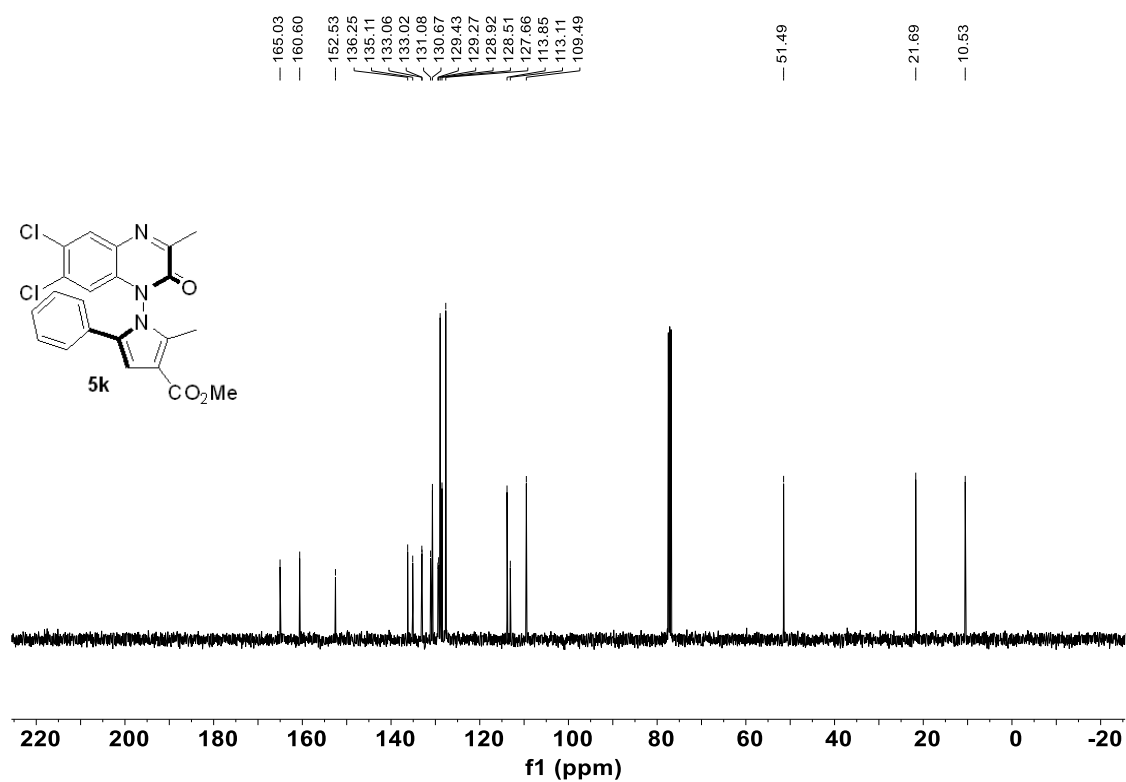

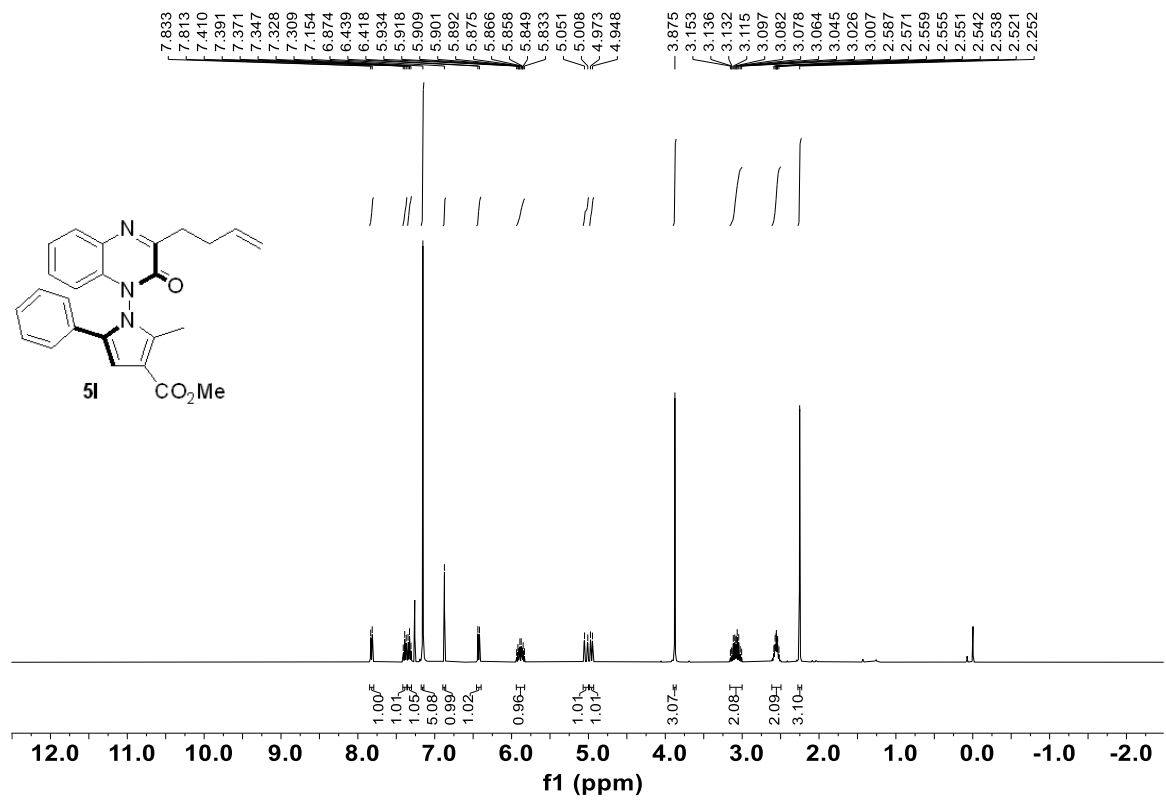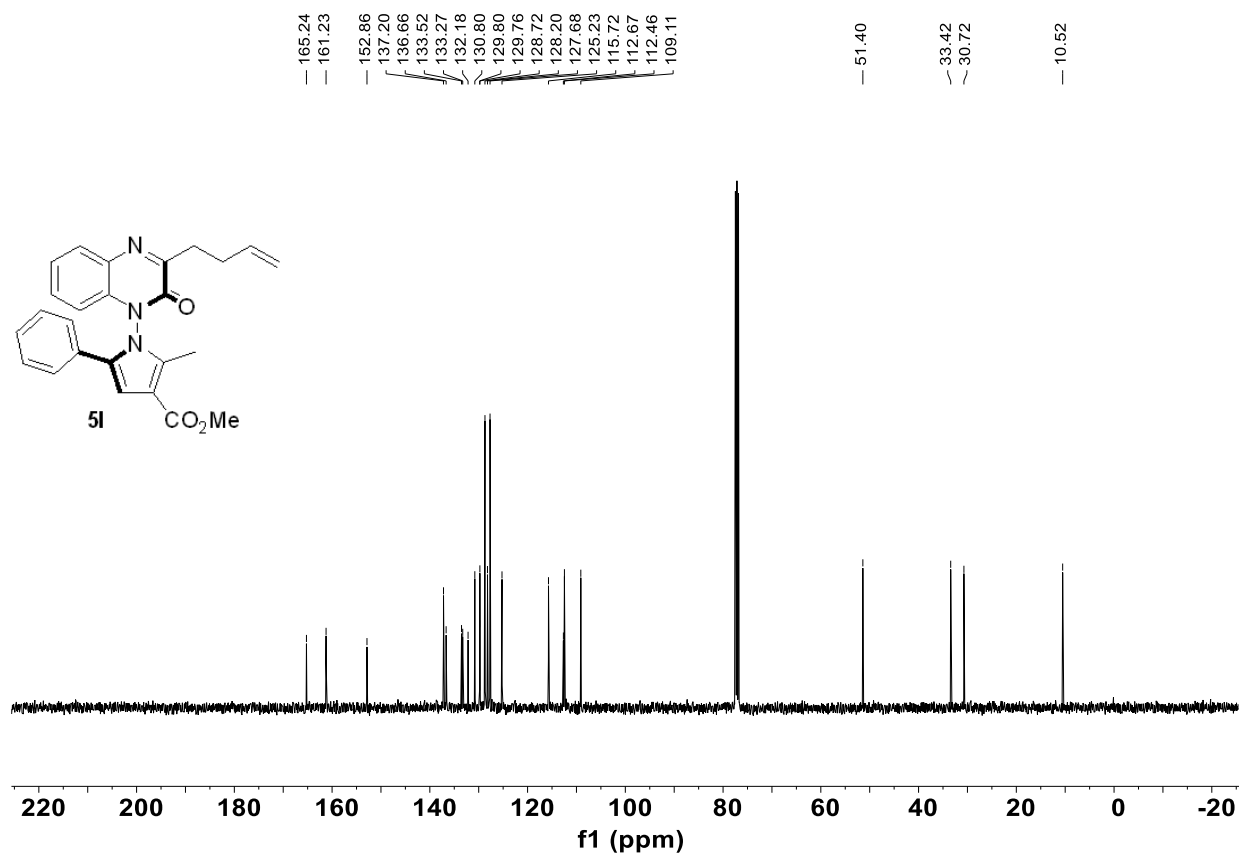

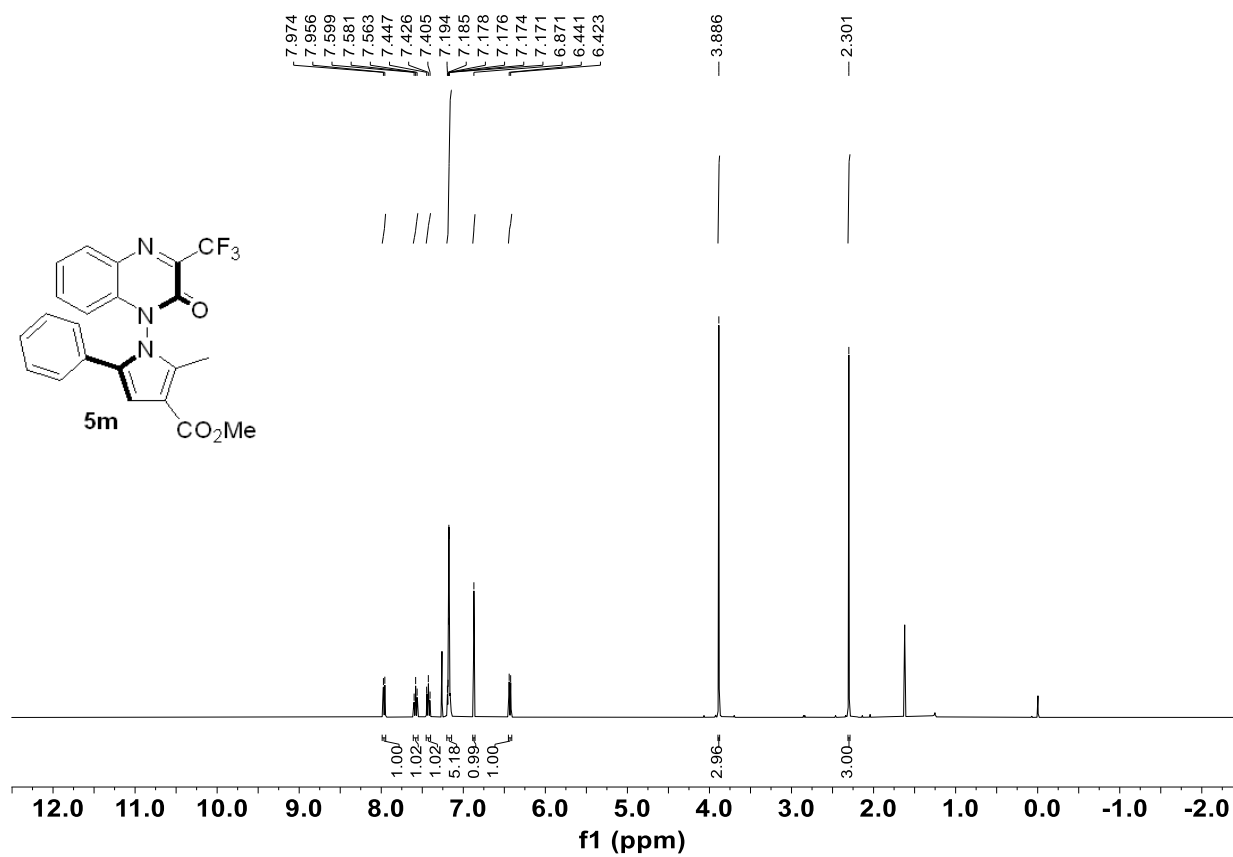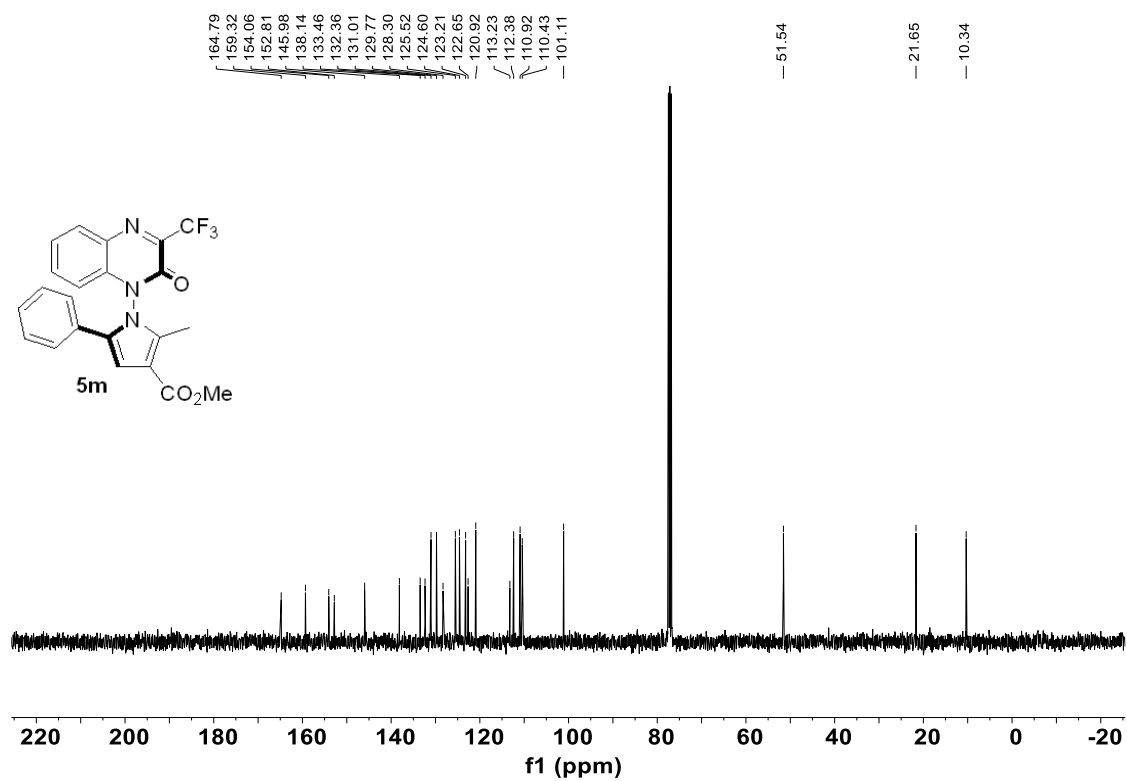

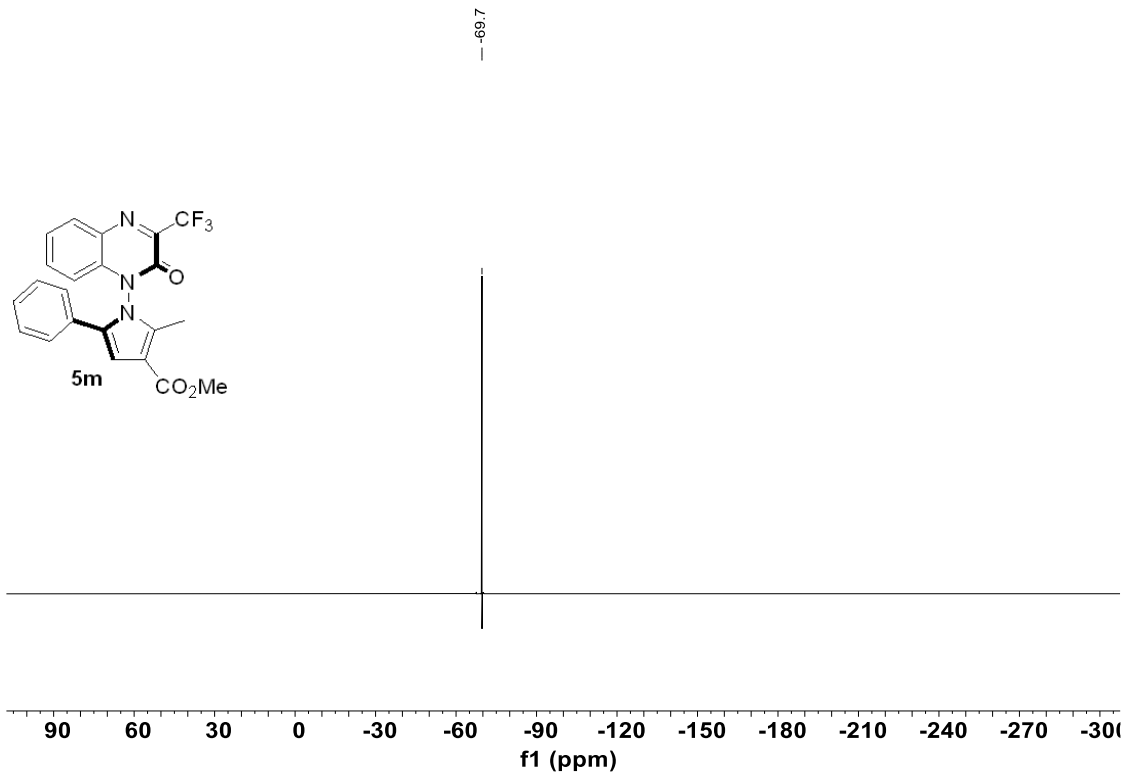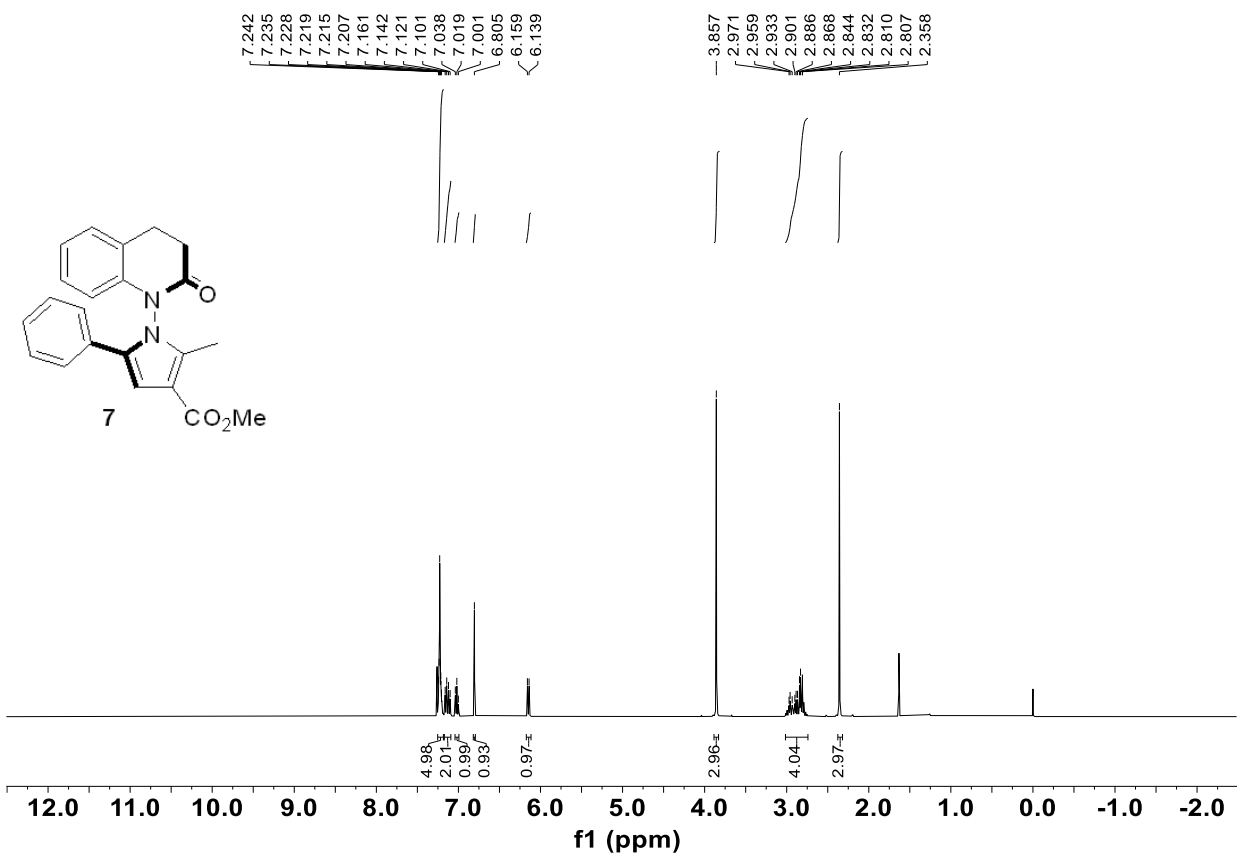

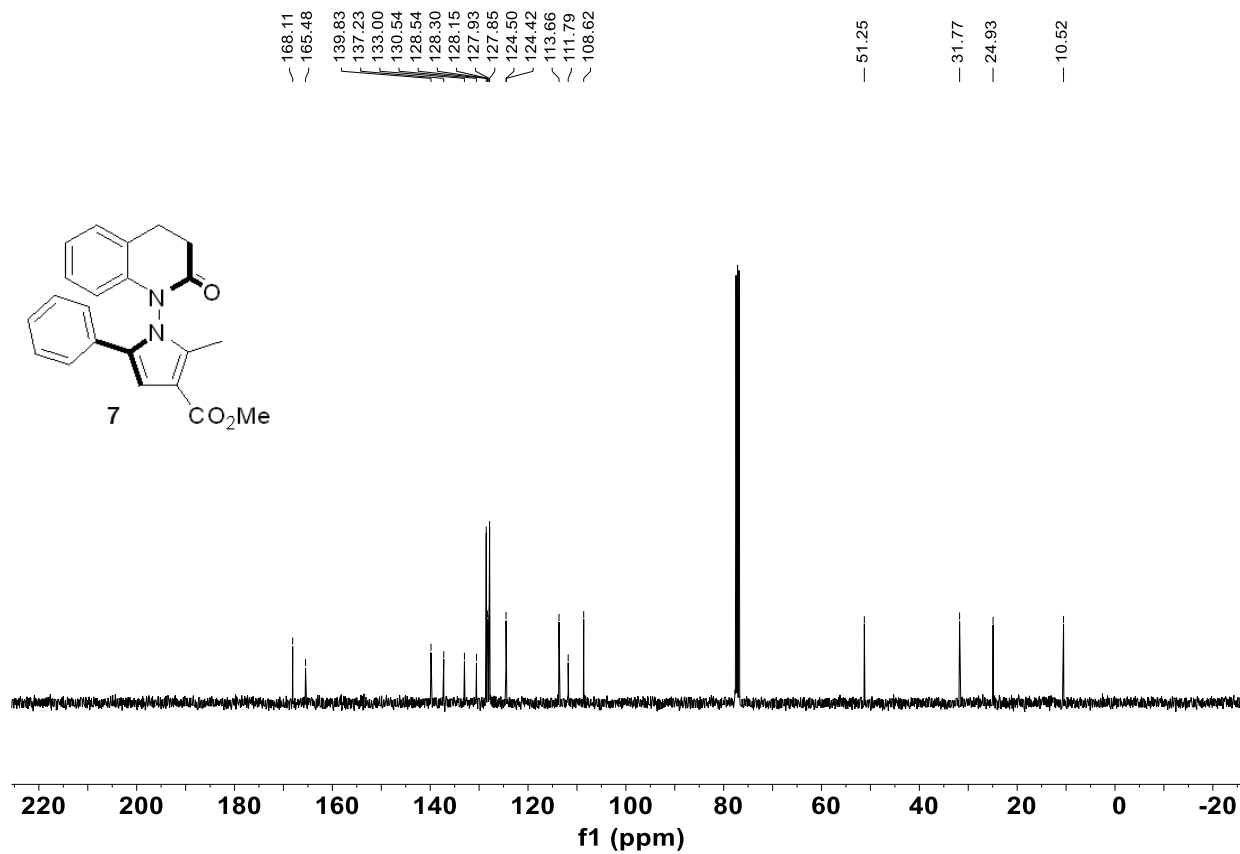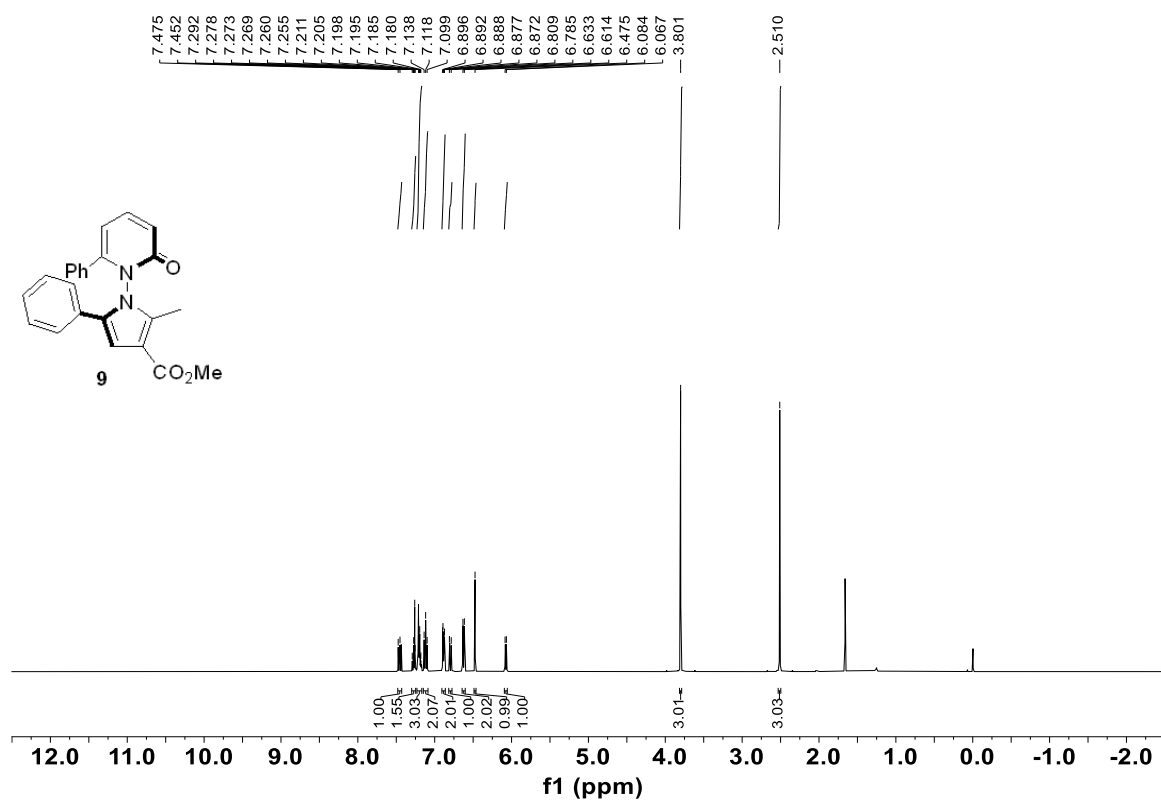



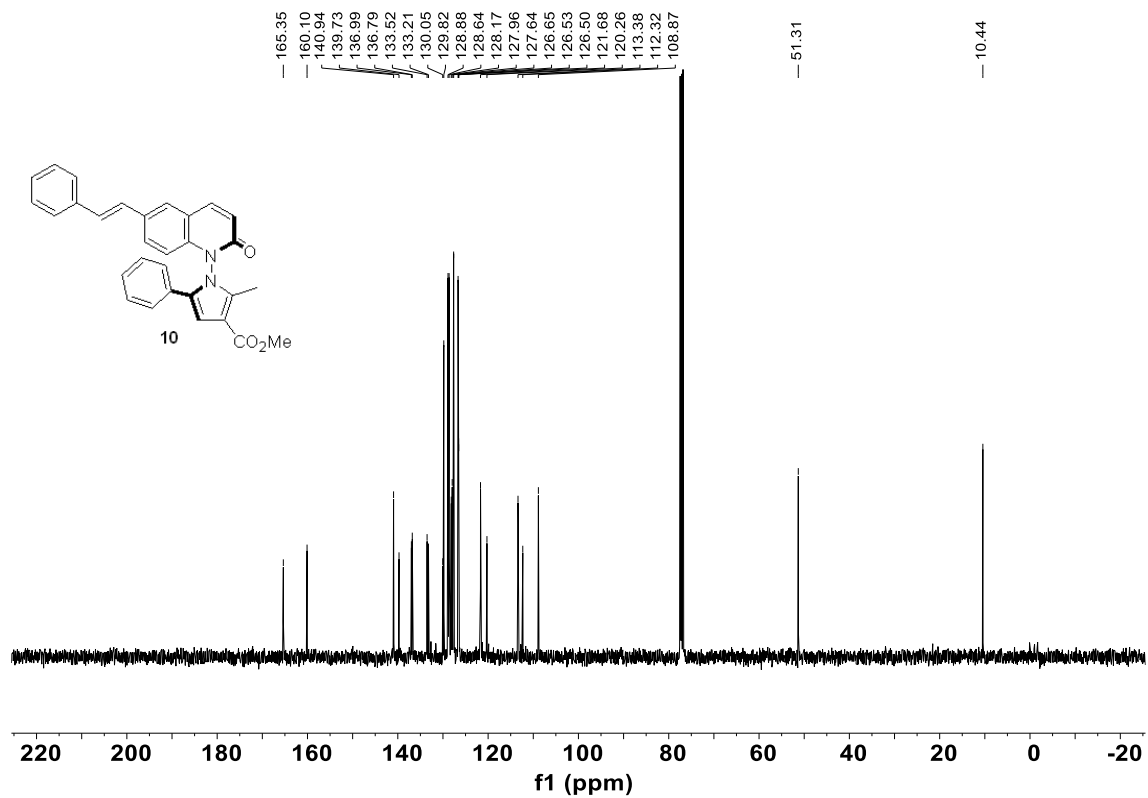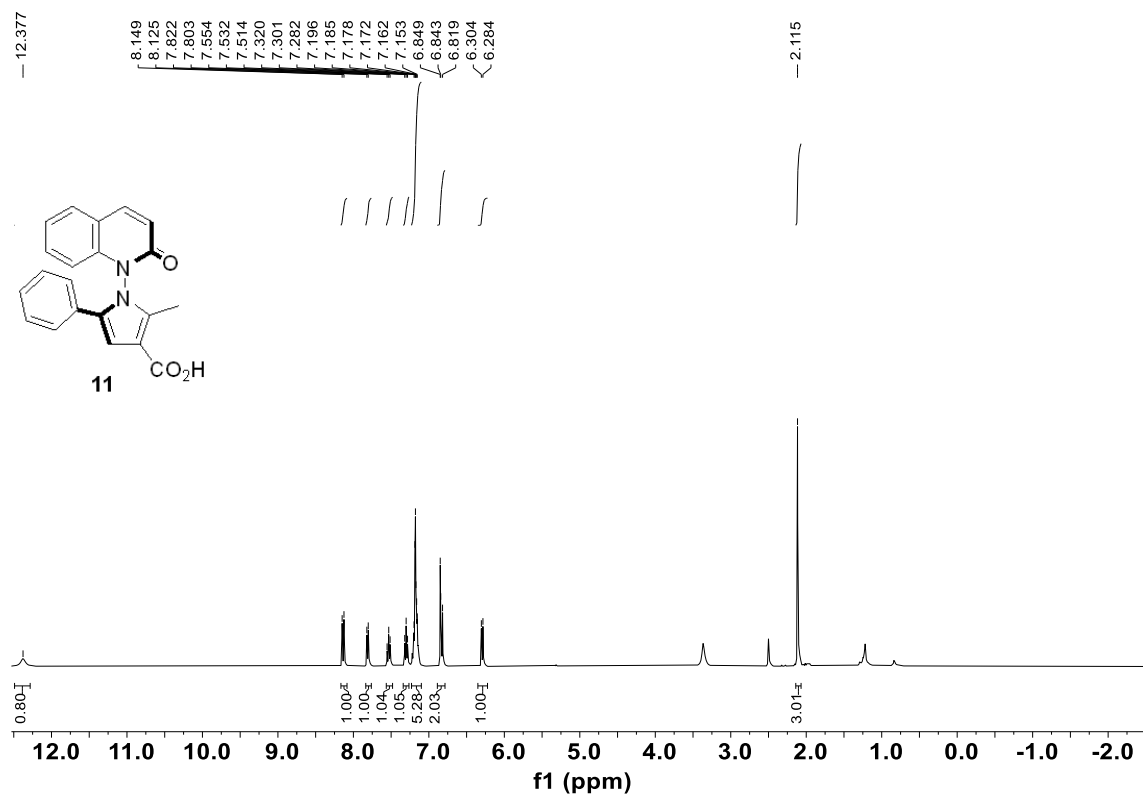

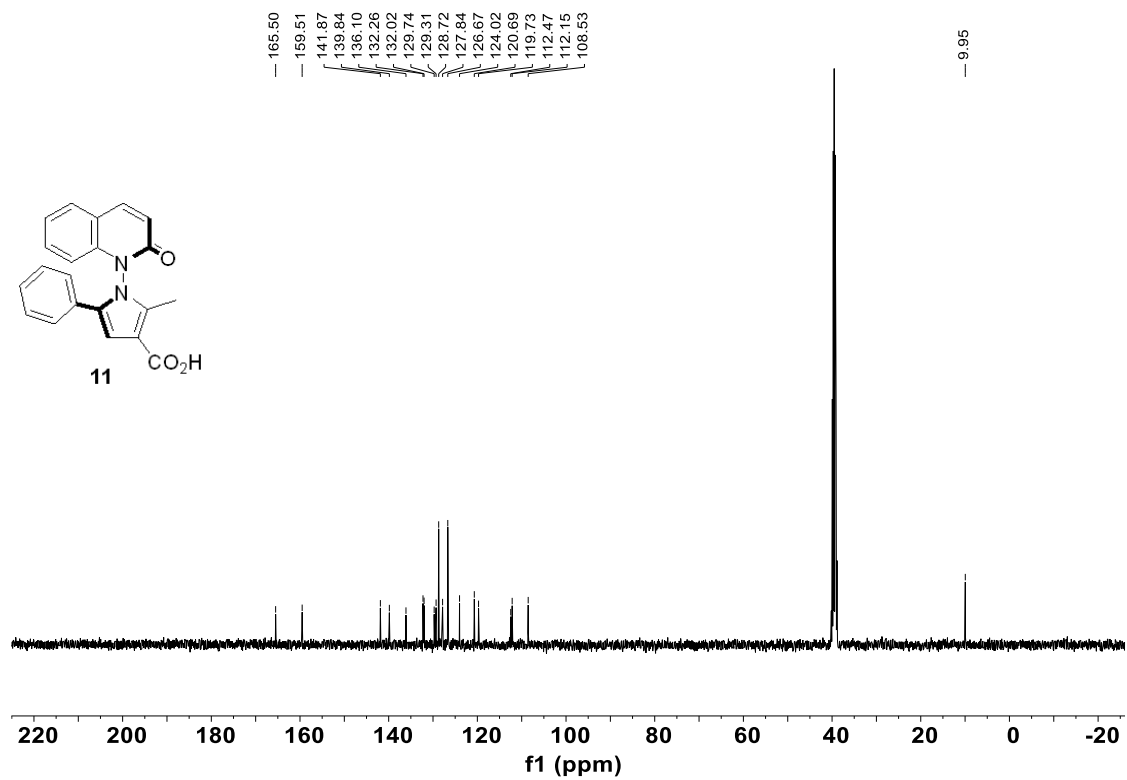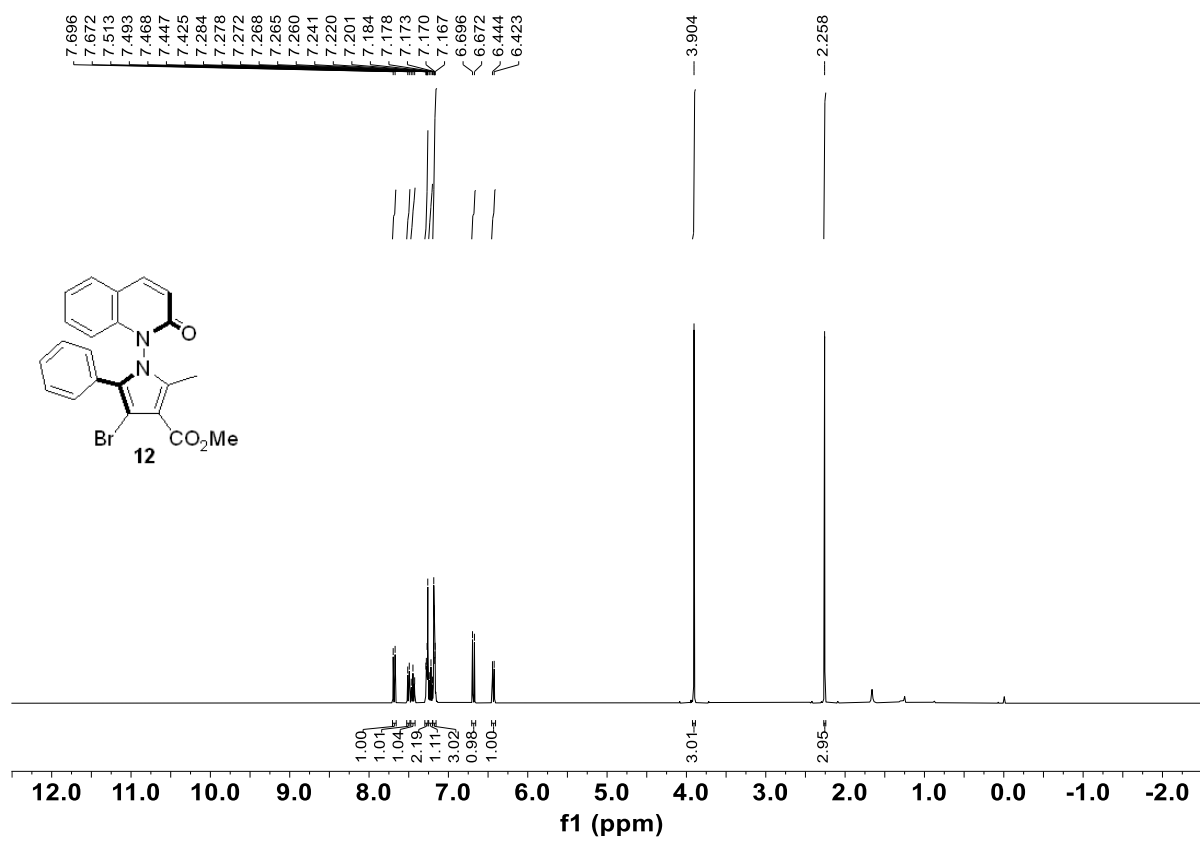



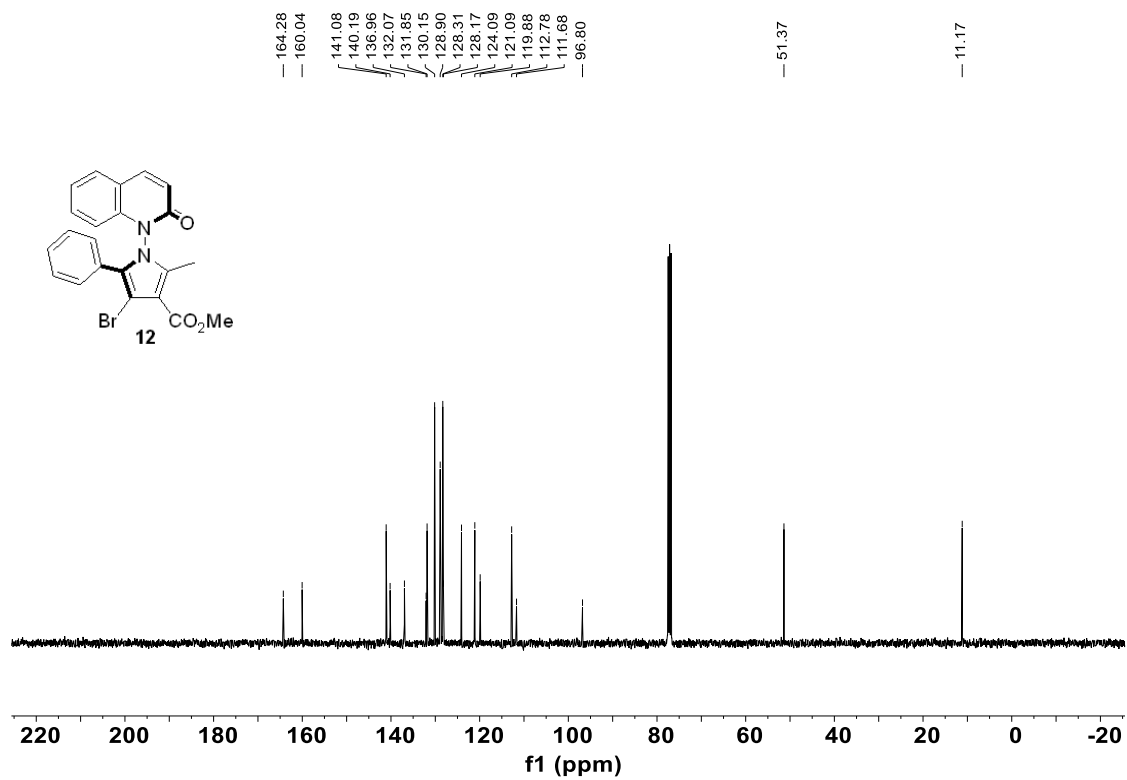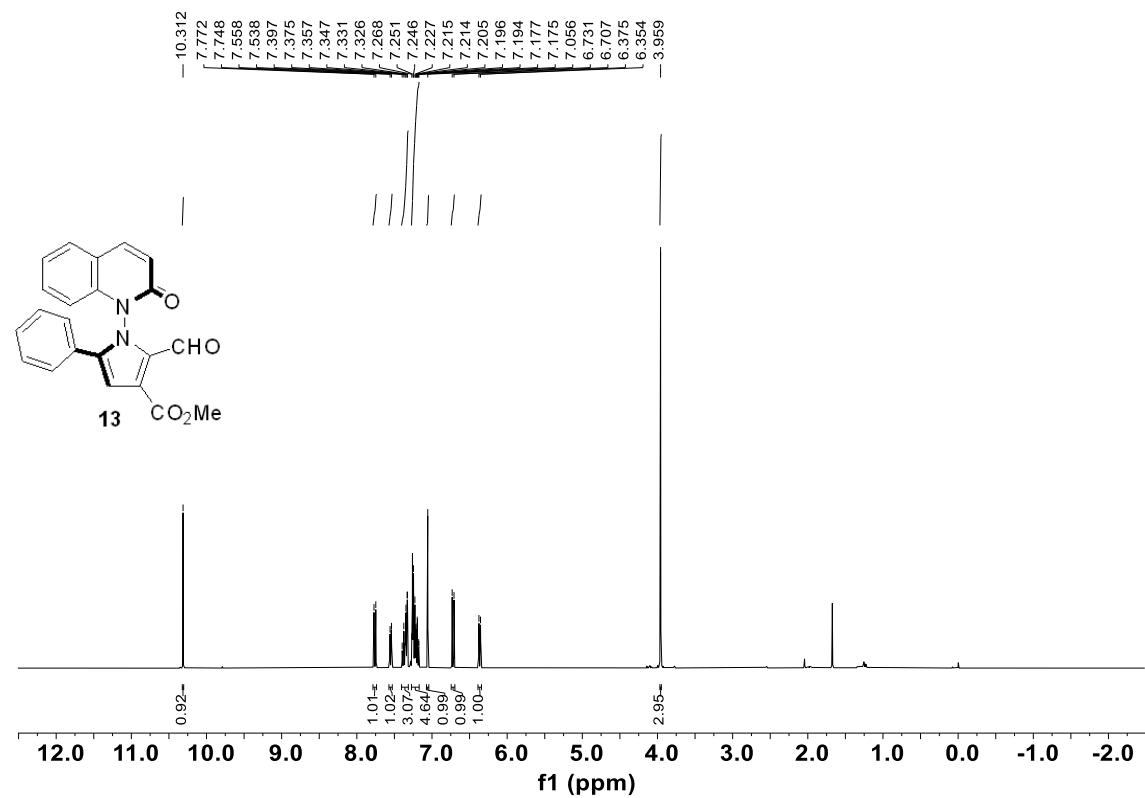

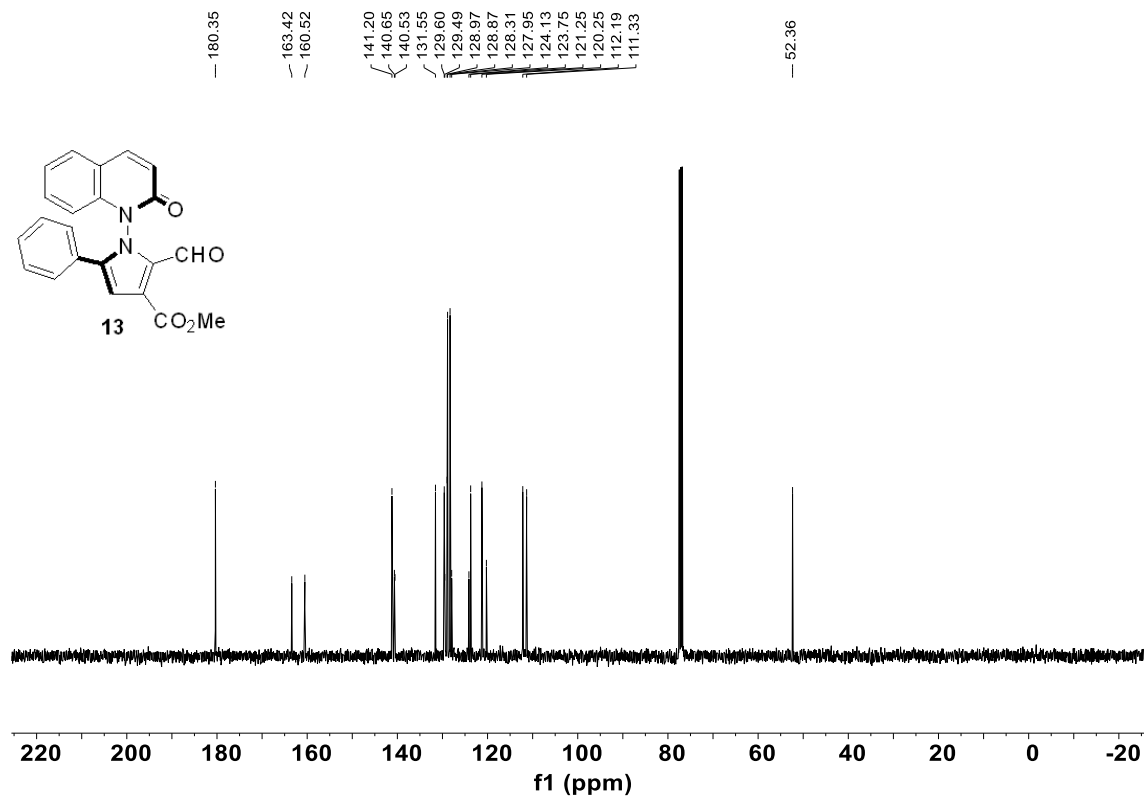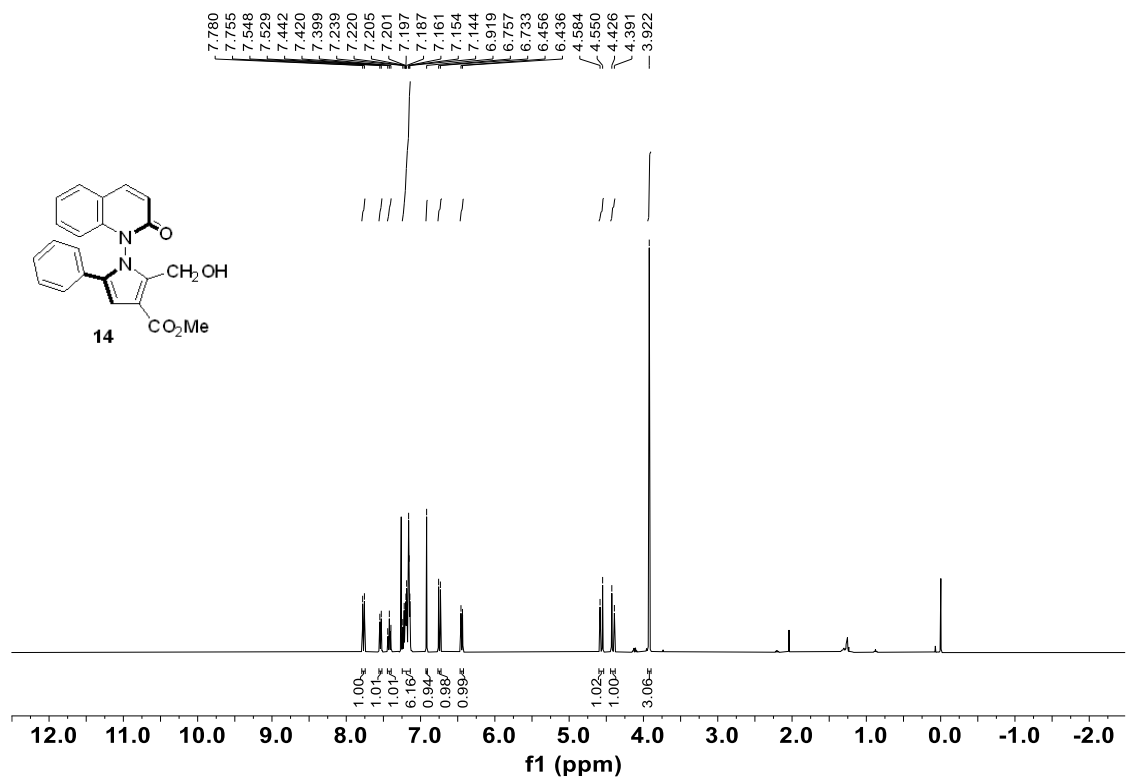

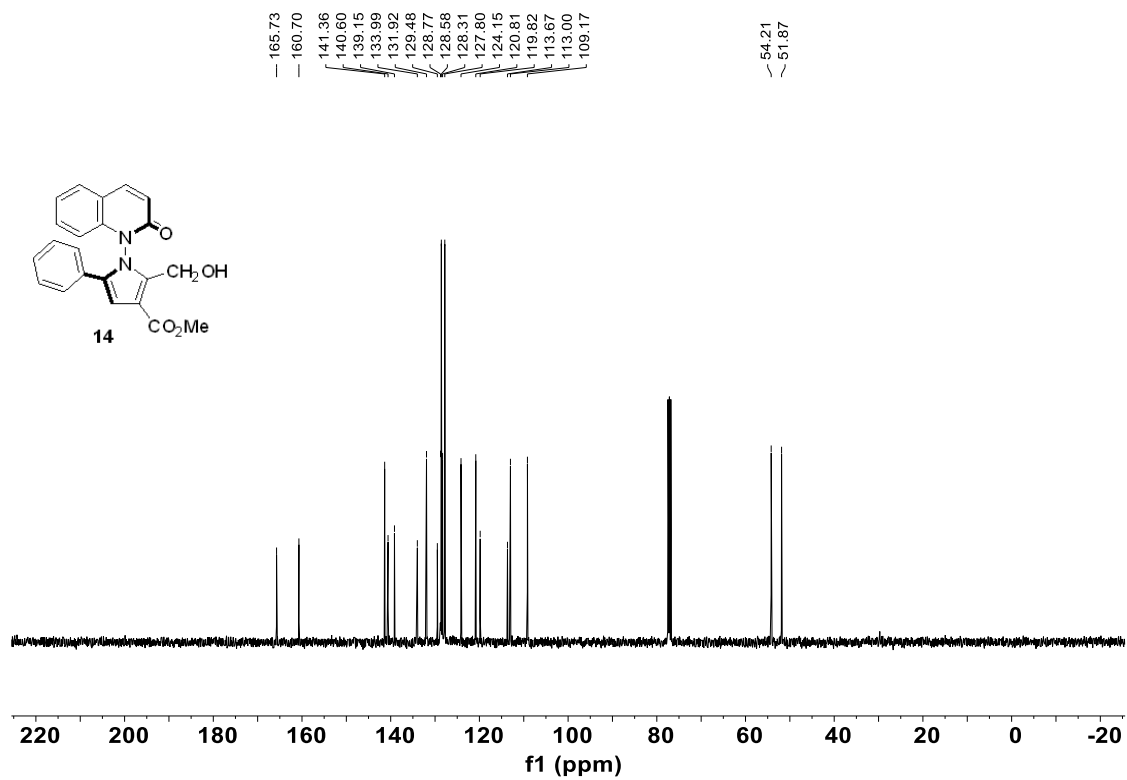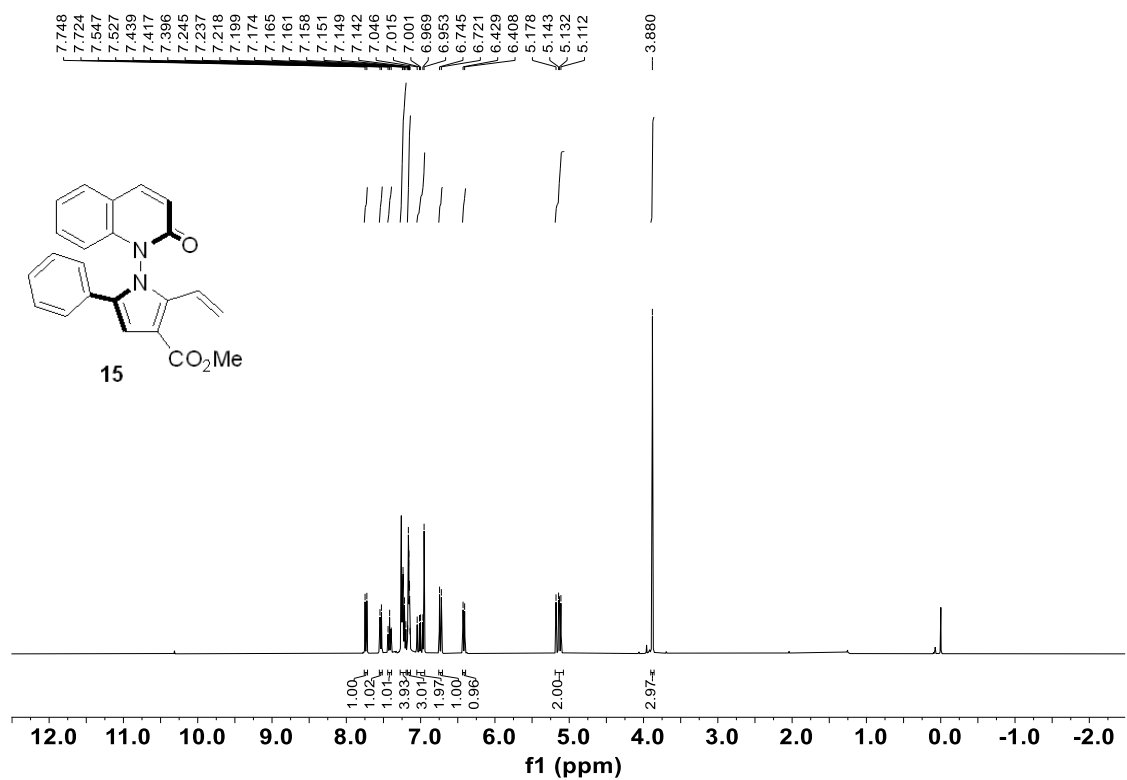

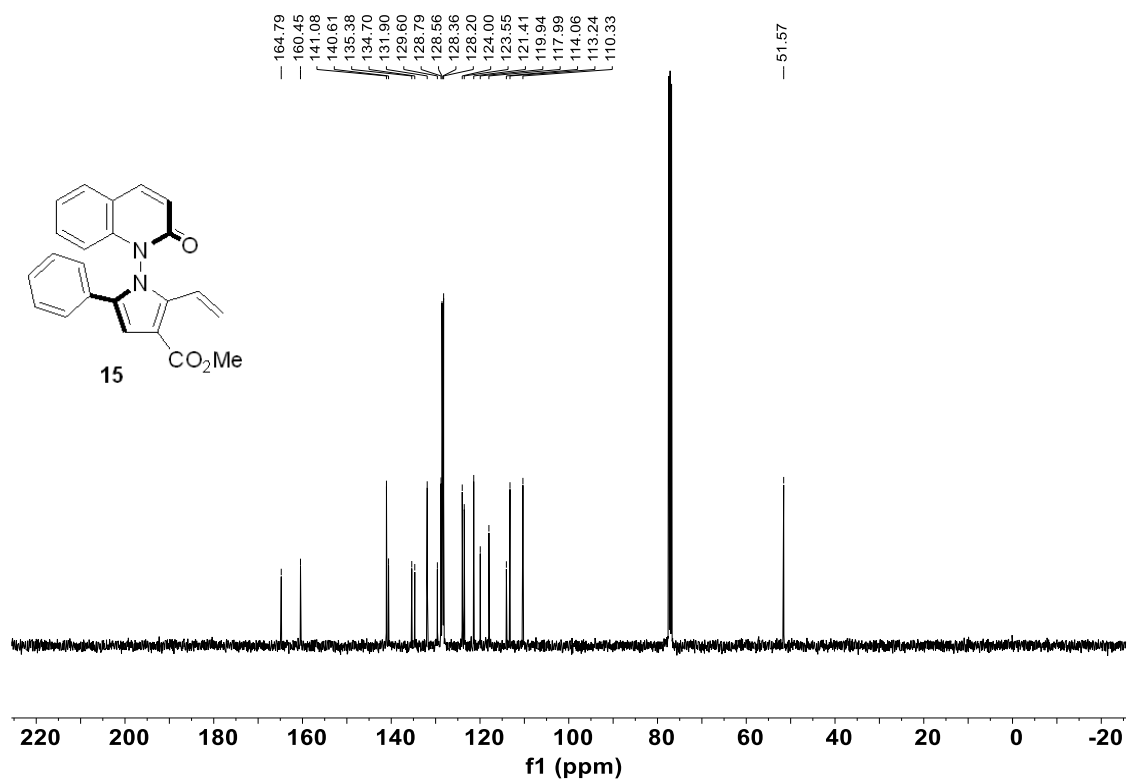

Supplement: d3qo01877f1.pdf [file d3qo01877f1.pdf]
